# Supplementary material for: LCM-seq reveals unique transcriptional adaptation mechanisms of resistant neurons and identifies protective pathways in spinal muscular atrophy
Source: Genome Res. 2020 Aug;30(8):1083–96. doi: 10.1101/gr.265017.120 (PMC7462070; doi:10.1101/gr.265017.120)
Supplement: Supplemental Material [file supp_gr.265017.120_Supplemental_Table_S2.xlsx]

## Sheet: Content
This file contains:
	Supplemental_Table_S2	Blue, Turquoise and Violet module genes and development genes (DGs) from the WGCNA of somatic control samples, related to Supplemental Fig. S6.

## Sheet: Table_S2
Blue, Turquoise and Violet module genes and development genes (DGs) from the WGCNA of somatic control samples. MM = module membership. DGs are highlighted in gray in the individual tables.
Note: positive MM values in the blue module indicate increased expression levels over time, whereas positive MM values in the turquoise and violet modules indicate lower expression levels over time															DEG = differentially expressed gene SMA versus control
Rank	geneSymbol	MM.blue	p.MM.blue		Rank	geneSymbol	MM.turquoise	p.MM.turquoise		Rank	geneSymbol	MM.violet	p.MM.violet		"Development genes"	direction development (based on MM)	direction SMA	comparison DG - DEG	earliest time point DEG
1	Gap43	0.93155	1.6776e-24		1	Actr2	-0.941921	2.66263e-26		1	Clu	0.902079	1.28087e-20	1	Cdkn1a	down	up	opposite	2
2	AW551984	0.926799	9.05261e-24		2	Usp5	0.923154	3.05951e-23		2	Tapt1	0.87326	7.2701e-18	2	Rac3	down	up	opposite	2
3	Marcksl1	0.924127	2.22355e-23		3	Pip4p2	-0.917416	1.85213e-22		3	Apba1	-0.86772	2.05988e-17	3	Tubb2b	down	up	opposite	2
4	Nav1	0.922791	3.44325e-23		4	Myef2	-0.913841	5.33038e-22		4	Hspb8	0.863182	4.67124e-17	4	Vat1	down	up	opposite	2
5	Cd63-ps	0.91949	9.81308e-23		5	Clstn1	0.906712	3.85075e-21		5	Rgs4	0.847813	6.1003e-16	5	Ano4	up	down	opposite	2
6	Cd63	0.911331	1.08994e-21		6	St13	-0.901986	1.3113e-20		6	Tmem189	0.843241	1.24134e-15	6	Gria3	up	down	opposite	2
7	Crmp1	0.911171	1.13986e-21		7	Ncdn	0.894754	7.61789e-20		7	Pls3	0.842128	1.47059e-15	7	Il23a	up	down	opposite	2
8	Kcna1	-0.9091	2.02185e-21		8	Gm12940	-0.893393	1.04587e-19		8	Plxdc1	0.839104	2.31554e-15	8	Luzp1	up	down	opposite	2
9	Spock2	-0.908511	2.37418e-21		9	Plbd2	0.89034	2.09646e-19		9	Hr	0.81699	4.93447e-14	9	Scn2b	up	down	opposite	2
10	Ldha	0.907846	2.8422e-21		10	Klhl9	-0.889259	2.66858e-19		10	Homer2	-0.802652	2.90233e-13	10	Slc4a2	up	down	opposite	2
11	Dynlt1-ps1	0.903582	8.7304e-21		11	Stx1b	0.887735	3.73448e-19		11	Pmp22	0.799521	4.19251e-13	11	Slc8b1	up	down	opposite	2
12	Jpt1	0.901511	1.47805e-20		12	Cbx3	-0.87655	3.82623e-18		12	Pet100	0.798437	4.75441e-13	12	Stim1	up	down	opposite	2
13	Scn4b	-0.899831	2.24644e-20		13	Clasp2	-0.875246	4.94532e-18		13	Ppp1r1a	-0.796308	6.07361e-13	13	Synj2bp	up	down	opposite	2
14	Kcnc3	-0.899301	2.55955e-20		14	Utp18	-0.874865	5.32733e-18		14	Gm15446	0.79233	9.52505e-13	14	Eps8	down	up	opposite	5
15	Cdc42	0.892635	1.24531e-19		15	Canx	-0.874103	6.17885e-18		15	Tmem255a	0.776735	5.08106e-12	15	Plk2	down	up	opposite	5
16	Dcx	0.888334	3.27422e-19		16	Vapa	-0.873218	7.32847e-18		16	Tmem200c	0.770911	9.17747e-12	16	Bcl6	up	down	opposite	5
17	Nat8l	-0.887901	3.60138e-19		17	Fkbp8	0.872446	8.49715e-18		17	Emc10	0.7571	3.48903e-11	17	Vgf	up	down	opposite	5
18	Nnat	0.885554	5.99057e-19		18	Arid1b	-0.864558	3.65524e-17		18	Aox1	0.75615	3.81257e-11	18	Anxa3	down	up	opposite	10
19	Nras	0.884203	7.99012e-19		19	Plec	0.862355	5.40512e-17		19	Anxa7	0.754771	4.33259e-11	19	Bloc1s2	down	up	opposite	10
20	Gnb4	0.881481	1.41213e-18		20	Gsk3b	-0.860198	7.87716e-17		20	Atp1a1	0.754661	4.37683e-11	20	Cacnb3	down	up	opposite	10
21	Dpysl3	0.879246	2.23077e-18		21	Gsdme	-0.85812	1.12552e-16		21	Pnpla6	0.752643	5.26923e-11	21	Cflar	down	up	opposite	10
22	Zbtb7a	-0.878578	2.55267e-18		22	Atp5d	0.856772	1.41443e-16		22	Caln1	0.752066	5.55461e-11	22	Chl1	down	up	opposite	10
23	Tubb2b	0.878365	2.66444e-18		23	Mt3	0.856581	1.46061e-16		23	Ifi27	0.744075	1.13661e-10	23	Col18a1	down	up	opposite	10
24	Tsc22d3	-0.874638	5.56872e-18		24	Sult4a1	0.856271	1.53872e-16		24	Nr2f2	-0.740727	1.52229e-10	24	Emx2	down	up	opposite	10
25	Marcks	0.872433	8.51911e-18		25	Dzip1	-0.855418	1.77524e-16		25	Kcns3	0.740642	1.53356e-10	25	Enc1	down	up	opposite	10
26	Hapln4	-0.871801	9.60909e-18		26	Wtap	-0.853583	2.40641e-16		26	Rhbdl3	0.738348	1.86842e-10	26	Fchsd1	down	up	opposite	10
27	Tspan6	0.870673	1.18939e-17		27	Mtch1	0.846437	7.57254e-16		27	Paqr7	0.733684	2.77491e-10	27	Fxyd6	down	up	opposite	10
28	Cd200	0.870012	1.34646e-17		28	Cetn3	-0.844234	1.06591e-15		28	Dock5	0.720762	7.96137e-10	28	Gap43	down	up	opposite	10
29	Nipsnap3b	0.869092	1.59865e-17		29	Impdh1	0.843554	1.1832e-15		29	Myo5a	-0.715819	1.17334e-09	29	Igsf10	down	up	opposite	10
30	Nefh	-0.867097	2.30909e-17		30	Hnrnpa2b1	-0.842768	1.33427e-15		30	Bace1	0.714177	1.33229e-09	30	Mmp2	down	up	opposite	10
31	Socs2	0.866678	2.49227e-17		31	Fry	-0.841985	1.50278e-15		31	Ccni	-0.713267	1.42894e-09	31	Mycn	down	up	opposite	10
32	Zmiz1	0.864553	3.65866e-17		32	Gnl3l	-0.841825	1.53957e-15		32	mt-Tl1	-0.708472	2.0576e-09	32	Nnt	down	up	opposite	10
33	Erc1	0.863694	4.26528e-17		33	Slc25a1	0.841181	1.69689e-15		33	Susd2	0.703663	2.94472e-09	33	Rcbtb1	down	up	opposite	10
34	Tusc3	0.862765	5.02808e-17		34	Mlf2	0.839875	2.06428e-15		34	Amigo1	0.696855	4.83327e-09	34	Scn3b	down	up	opposite	10
35	Gm11223	0.862697	5.08904e-17		35	Hnrnpa1	-0.839601	2.15034e-15		35	Atxn1	-0.695852	5.19329e-09	35	Serpine2	down	up	opposite	10
36	Snca	0.861702	6.0624e-17		36	Prkar1b	0.836889	3.20996e-15		36	Trim16	0.695696	5.25129e-09	36	Stmn4	down	up	opposite	10
37	Arhgdig	0.861568	6.20625e-17		37	Psma3	-0.834841	4.32338e-15		37	Plcb1	-0.690973	7.33583e-09	37	Syt1	down	up	opposite	10
38	Scn1b	-0.861498	6.28218e-17		38	Clptm1	0.833037	5.60125e-15		38	Ypel5	0.689668	8.03633e-09	38	Syt5	down	up	opposite	10
39	Kcnab2	-0.861145	6.68131e-17		39	Matr3	-0.832513	6.0357e-15		39	Kif22	0.678624	1.70761e-08	39	Acan	up	down	opposite	10
40	Hcfc1r1	0.859996	8.15737e-17		40	Syt11	0.831001	7.47502e-15		40	Ivns1abp	-0.675595	2.08788e-08	40	Aldoa	up	down	opposite	10
41	Idh1	0.858071	1.13481e-16		41	Rbm26	-0.830525	7.9918e-15		41	Rbm25	-0.674847	2.19349e-08	41	Cacna2d3	up	down	opposite	10
42	Rph3a	-0.856339	1.52127e-16		42	Arfgap1	0.83037	8.16762e-15		42	Parva	0.671729	2.68981e-08	42	Cpeb1	up	down	opposite	10
43	Kcnk1	-0.855729	1.68524e-16		43	Kcnk3	0.828559	1.05127e-14		43	Inppl1	0.669882	3.03167e-08	43	Cpne6	up	down	opposite	10
44	Thy1	-0.854761	1.98042e-16		44	Slc27a4	0.826945	1.31336e-14		44	Dcaf7	-0.664319	4.32567e-08	44	Grm4	up	down	opposite	10
45	Vamp1	-0.854698	2.00118e-16		45	Acsl4	-0.826492	1.3975e-14		45	4632428C04Rik	0.661744	5.08655e-08	45	Hapln4	up	down	opposite	10
46	Serf1	0.852685	2.78841e-16		46	Arhgdia	0.825672	1.56276e-14		46	Plcl2	-0.659667	5.79003e-08	46	Htra1	up	down	opposite	10
47	Mbnl1	-0.852496	2.87578e-16		47	Prpf39	-0.824433	1.84845e-14		47	Ptprz1	-0.647928	1.18201e-07	47	Jph3	up	down	opposite	10
48	Pkm	-0.85084	3.76328e-16		48	Set	-0.824319	1.87727e-14		48	Hsph1	0.639248	1.96519e-07	48	Kcnab1	up	down	opposite	10
49	Ctxn1	0.84963	4.57079e-16		49	Aars	0.821739	2.65124e-14		49	Mtss2	-0.637637	2.15578e-07	49	Kcng4	up	down	opposite	10
50	Septin11	0.849119	4.95909e-16		50	Ppp1cb	-0.821722	2.65698e-14		50	Rprml	0.632613	2.86791e-07	50	Kif5a	up	down	opposite	10
51	Lgi3	-0.848925	5.11445e-16		51	Tubb4b	0.821129	2.87424e-14		51	Prkaa2	-0.620602	5.55994e-07	51	L3mbtl4	up	down	opposite	10
52	Kcng4	-0.848617	5.37106e-16		52	Tuba4a	0.81901	3.79665e-14		52	Lamp1	0.611853	8.85142e-07	52	Ldlr	up	down	opposite	10
53	Eid1	0.848262	5.68267e-16		53	Map2k2	0.817754	4.4702e-14		53	Sdk2	-0.601802	1.48458e-06	53	Lin7b	up	down	opposite	10
54	Fgf11	-0.84799	5.93278e-16		54	Uchl1	0.815673	5.84329e-14		54	Igfbp5	-0.601681	1.4937e-06	54	Map2k2	up	down	opposite	10
55	Pura	-0.846419	7.59493e-16		55	Tmem59l	0.813166	8.03328e-14		55	Trp53i11	-0.593442	2.25245e-06	55	Nefh	up	down	opposite	10
56	Chl1	0.84636	7.66459e-16		56	Gatad1	-0.812034	9.26011e-14		56	Twistnb	-0.586185	3.20442e-06	56	Pdgfd	up	down	opposite	10
57	Dynlt1a	0.844804	9.76145e-16		57	Esyt1	0.811585	9.79368e-14		57	Rab4b	0.584012	3.5552e-06	57	Psmc5	up	down	opposite	10
58	Septin4	-0.844737	9.8636e-16		58	Paip1	-0.810317	1.14671e-13		58	Mast4	-0.581479	4.00922e-06	58	Rph3a	up	down	opposite	10
59	B3galt5	-0.843147	1.25926e-15		59	Ptprn	0.810292	1.15028e-13		59	Bend5	-0.578243	4.66754e-06	59	Scn4b	up	down	opposite	10
60	Fxyd6	0.843031	1.28171e-15		60	Arglu1	-0.807892	1.54519e-13		60	Mrps6	-0.561501	9.99423e-06	60	Septin4	up	down	opposite	10
61	Ftl1	0.842829	1.32178e-15		61	Mlec	0.807181	1.68513e-13		61	Rbfox2	-0.547772	1.81051e-05	61	Sez6l2	up	down	opposite	10
62	Syt2	-0.840909	1.76792e-15		62	Lyrm4	-0.806264	1.88324e-13		62	mt-Nd2	-0.535031	3.07141e-05	62	Slc16a6	up	down	opposite	10
63	Syp	-0.840757	1.80886e-15		63	Tubb4a	0.805201	2.14101e-13		63	Fblim1	-0.523344	4.8966e-05	63	Slc25a33	up	down	opposite	10
64	Gstm1	0.840735	1.81466e-15		64	Celsr2	0.804335	2.37523e-13		64	Prnp	0.522457	5.06957e-05	64	Slc38a2	up	down	opposite	10
65	Adam23	-0.840398	1.90887e-15		65	Flywch1	0.803004	2.78349e-13		65	Lrrc8d	-0.464622	0.000401097	65	Stx4a	up	down	opposite	10
66	Slc44a5	0.839902	2.05604e-15		66	Lgr4	-0.80279	2.85519e-13		66	Irf1	0.458129	0.000494875	66	Syde1	up	down	opposite	10
67	Lcp1	-0.839589	2.15422e-15		67	Tubb3	0.801665	3.26148e-13		67	Ednrb	-0.457674	0.000502122	67	Syndig1	up	down	opposite	10
68	Pxdn	0.839381	2.22216e-15		68	Tmem160	0.800321	3.81891e-13		68	Arhgap5	-0.420357	0.00155232	68	Syt3	up	down	opposite	10
69	Abca2	-0.839072	2.32654e-15		69	Schip1	-0.798017	4.99106e-13		69	Gm13725	0.400303	0.00270606	69	Tnfrsf12a	up	down	opposite	10
70	Pcdh11x	0.838744	2.44275e-15		70	Lynx1	0.797095	5.54981e-13		70	Efcab1	-0.392667	0.00331464	70	Tubb3	up	down	opposite	10
71	Dchs1	0.838375	2.57986e-15		71	Cend1	0.796257	6.10931e-13		71	Slc22a23	-0.383029	0.0042535	71	Wnt5b	up	down	opposite	10
72	Gm4204	-0.833262	5.42454e-15		72	Syn1	0.796128	6.20023e-13		72	Erp29	0.368331	0.00613626	72	Acsl4	down	down	same	2
73	Cnrip1	0.833185	5.48406e-15		73	Nfic	0.792702	9.13702e-13		73	Gm25630	-0.348672	0.00976908	73	Actb	down	down	same	2
74	Itm2c	-0.832711	5.86756e-15		74	Pmepa1	0.790009	1.23302e-12		74	Gm15155	-0.342947	0.0111274	74	Actr2	down	down	same	2
75	Hip1	0.832071	6.42652e-15		75	Sv2c	0.789786	1.26369e-12						75	Angptl3	down	down	same	2
76	Gm12892	-0.831428	7.03794e-15		76	Grin1	0.785222	2.07837e-12						76	Atp7b	down	down	same	2
77	Nos1ap	-0.830859	7.6253e-15		77	Ifitm10	0.782436	2.79943e-12						77	Bnip2	down	down	same	2
78	Dpysl5	0.829387	9.37042e-15		78	Fstl1	0.782057	2.91418e-12						78	Cbx3	down	down	same	2
79	Gnai3	0.828865	1.00771e-14		79	Faim2	0.78004	3.60408e-12						79	Gsdme	down	down	same	2
80	Klhl23	0.828753	1.02346e-14		80	Cdc37	0.779316	3.8879e-12						80	Dock7	down	down	same	2
81	Lrrc49	-0.826916	1.31863e-14		81	Dync1li1	-0.775132	5.98974e-12						81	Eef1a1	down	down	same	2
82	Asxl3	0.826219	1.45061e-14		82	Usp22	-0.774903	6.13131e-12						82	Fry	down	down	same	2
83	Ybx1	0.825376	1.62702e-14		83	Timp2	0.77451	6.38231e-12						83	Gsk3b	down	down	same	2
84	Ckb	-0.823207	2.17992e-14		84	Tet2	-0.773498	7.07286e-12						84	H2-K1	down	down	same	2
85	Eno2	-0.822609	2.36119e-14		85	Pcsk1n	0.77255	7.78458e-12						85	Hdac6	down	down	same	2
86	Ddah2	0.822534	2.38511e-14		86	Dctn2	0.772444	7.86803e-12						86	Ino80	down	down	same	2
87	Neo1	0.822068	2.53773e-14		87	Tesc	0.772421	7.88636e-12						87	Jmjd1c	down	down	same	2
88	Tes	0.821406	2.7707e-14		88	Dyrk1a	-0.772317	7.96949e-12						88	Lrrc8a	down	down	same	2
89	Prmt2	0.81889	3.85655e-14		89	Serbp1	-0.77217	8.08817e-12						89	Man2a1	down	down	same	2
90	Pkia	0.81822	4.20807e-14		90	Twf1	-0.771101	9.00458e-12						90	Map3k12	down	down	same	2
91	Cacnb3	0.818073	4.28954e-14		91	Ptbp2	-0.770184	9.86861e-12						91	Msl3	down	down	same	2
92	Gas6	-0.818071	4.29054e-14		92	Begain	0.769644	1.04135e-11						92	mt-Co1	down	down	same	2
93	Wdr6	0.817349	4.71087e-14		93	Robo1	-0.767242	1.32038e-11						93	Mtmr2	down	down	same	2
94	Psme1	0.816492	5.261e-14		94	Dohh	0.766171	1.46638e-11						94	Osbpl8	down	down	same	2
95	Fnbp1l	0.815897	5.67857e-14		95	Myo18a	0.764331	1.75379e-11						95	Picalm	down	down	same	2
96	Arl4a	0.81578	5.76365e-14		96	Picalm	-0.764227	1.7715e-11						96	Pmch	down	down	same	2
97	Fth1	-0.815591	5.90481e-14		97	Fam169a	-0.764044	1.80309e-11						97	Rdh13	down	down	same	2
98	Acly	-0.815369	6.07503e-14		98	Oaz2	0.761414	2.32132e-11						98	Rock1	down	down	same	2
99	Cacna2d1	0.813473	7.72748e-14		99	Rgs7bp	0.761306	2.34543e-11						99	Set	down	down	same	2
100	Scn3a	0.81281	8.40139e-14		100	1110008P14Rik	0.761101	2.39169e-11						100	Slc39a1	down	down	same	2
101	Trnp1	-0.811381	1.00465e-13		101	Actr1a	0.761054	2.40233e-11						101	Slitrk2	down	down	same	2
102	Cxadr	0.810445	1.12863e-13		102	Cadm3	0.759999	2.6559e-11						102	Syt12	down	down	same	2
103	Gprin1	0.809839	1.21651e-13		103	Sppl2b	0.759146	2.879e-11						103	Syt4	down	down	same	2
104	Tbc1d16	0.809461	1.27463e-13		104	Sec23ip	-0.758534	3.05006e-11						104	Ube2b	down	down	same	2
105	Vim	0.808691	1.40119e-13		105	Hmgcr	-0.757888	3.24081e-11						105	Vapa	down	down	same	2
106	Tmeff1	0.80785	1.55322e-13		106	Pebp1	0.757223	3.44936e-11						106	Ywhae	down	down	same	2
107	Fgf1	-0.807268	1.66722e-13		107	Spin1	-0.756285	3.76467e-11						107	Cbx6	up	up	same	2
108	Sv2b	-0.807259	1.66905e-13		108	Dpysl2	-0.754832	4.30833e-11						108	Eif4g1	up	up	same	2
109	Pacsin1	-0.80625	1.88654e-13		109	Neu1	0.753308	4.95782e-11						109	Irs2	up	up	same	2
110	Ppp1r3d	0.806169	1.90501e-13		110	Cbx1	-0.753121	5.0437e-11						110	Sema6b	up	up	same	2
111	Dynlt1f	0.806052	1.93222e-13		111	Gm26917	0.753098	5.05434e-11						111	Syn1	up	up	same	2
112	Erc2	0.805431	2.08246e-13		112	Nomo1	0.752393	5.39136e-11						112	Traf6	up	up	same	2
113	Syngr1	-0.80523	2.13351e-13		113	Tma7	-0.752033	5.57152e-11						113	Epb41l5	down	down	same	5
114	Ywhag	-0.805094	2.1687e-13		114	Atp6v0a1	0.748723	7.51851e-11						114	Nrbp2	down	down	same	5
115	Zfp57	0.804263	2.39572e-13		115	Psmd3	0.748227	7.86085e-11						115	Spry2	down	down	same	5
116	Sptssa	0.804173	2.42182e-13		116	Vbp1	-0.745565	9.96566e-11						116	Ak8	up	up	same	5
117	Gria3	-0.804108	2.44049e-13		117	Micu3	-0.744609	1.08432e-10						117	Pcdhb11	up	up	same	5
118	Plppr3	0.804046	2.45888e-13		118	Gm10800	-0.744445	1.10018e-10						118	Sox10	up	up	same	5
119	Svbp	0.802905	2.81657e-13		119	Tmem151a	0.744253	1.11887e-10						119	Coro1a	down	down	same	10
120	Psd	0.80248	2.96189e-13		120	Septin10	-0.744191	1.12503e-10						120	Cfap20	down	down	same	10
121	Hes1	-0.802444	2.97457e-13		121	Ythdf2	-0.743937	1.15046e-10						121	Carmil1	down	down	same	10
122	Myadm	0.801505	3.3236e-13		122	Nmt2	-0.743867	1.15751e-10						122	Nrp2	down	down	same	10
123	Taf9b	0.801482	3.33226e-13		123	Hnrnpa0	-0.743774	1.16703e-10						123	Pdk1	down	down	same	10
124	Patj	-0.801061	3.50141e-13		124	Spag9	-0.743202	1.22711e-10						124	Ppp1r1c	down	down	same	10
125	Luzp1	-0.800455	3.75929e-13		125	Ric1	-0.742334	1.32384e-10						125	Srgap2	down	down	same	10
126	Cplx1	-0.80004	3.94645e-13		126	Camk2g	0.74187	1.37844e-10						126	Tfrc	down	down	same	10
127	Wsb1	0.7989	4.5062e-13		127	Rnf187	0.741262	1.45326e-10						127	Cav1	up	up	same	10
128	Mbnl2	-0.798899	4.50682e-13		128	Rock1	-0.740377	1.56911e-10						128	Cldn10	up	up	same	10
129	Gramd1b	-0.79866	4.63345e-13		129	Ablim2	0.740316	1.57744e-10						129	Colq	up	up	same	10
130	Adora1	-0.798313	4.82317e-13		130	Coro2b	0.739841	1.64348e-10						130	Cryab	up	up	same	10
131	Fam102b	0.797507	5.29341e-13		131	Supt6	0.739347	1.71483e-10						131	Pak4	up	up	same	10
132	Ttll7	-0.797479	5.3106e-13		132	Prrc2c	-0.738435	1.85456e-10						132	Slc15a4	up	up	same	10
133	Dapk1	0.796581	5.88736e-13		133	Sub1	-0.737578	1.99568e-10						133	Slc17a6	up	up	same	10
134	Tubb5	0.796069	6.24174e-13		134	Ncs1	0.736649	2.16001e-10						134	Trp53inp1	up	up	same	10
135	Shtn1	0.795849	6.40104e-13		135	Mcmbp	-0.735626	2.35598e-10						135	Baiap2	down	up/down	-	2
136	Uhmk1	-0.795591	6.59168e-13		136	Rtl8a	0.734706	2.54627e-10						136	Magt1	up	up/down	-	2
137	Inpp5j	-0.794478	7.47958e-13		137	Arxes2	-0.734096	2.68043e-10						137	Nav1	down	ns	N/A	N/A
138	L1cam	0.793973	7.91892e-13		138	Rab11fip4	0.733662	2.78006e-10						138	Cd63	down	ns	N/A	N/A
139	Coch	0.79345	8.39981e-13		139	Krtcap2	0.733146	2.90284e-10						139	Crmp1	down	ns	N/A	N/A
140	Ldhb	-0.793274	8.56831e-13		140	Smyd2	0.732754	2.99962e-10						140	Kcna1	up	ns	N/A	N/A
141	9530082P21Rik	-0.793231	8.60967e-13		141	Atp6v0e2	0.731725	3.26835e-10						141	Dynlt1-ps1	down	ns	N/A	N/A
142	Mpc2	-0.792978	8.85772e-13		142	Lrch2	-0.731496	3.33101e-10						142	Kcnc3	up	ns	N/A	N/A
143	Slc6a6	0.792406	9.44478e-13		143	Mark2	0.730779	3.53535e-10						143	Cdc42	down	ns	N/A	N/A
144	Pcp4l1	-0.792202	9.66217e-13		144	Cbarp	0.730526	3.61006e-10						144	Dcx	down	ns	N/A	N/A
145	Cox14	-0.791794	1.01137e-12		145	Gm12346	0.729506	3.92733e-10						145	Nat8l	up	ns	N/A	N/A
146	Rprm	0.791107	1.09171e-12		146	Ankmy2	-0.728935	4.11619e-10						146	Nnat	down	ns	N/A	N/A
147	Scn9a	0.790856	1.12255e-12		147	Clip3	0.728496	4.26709e-10						147	Dpysl3	down	ns	N/A	N/A
148	Tln1	0.790823	1.12664e-12		148	Fbxo2	0.727879	4.48815e-10						148	Socs2	down	ns	N/A	N/A
149	Nrbp2	0.790803	1.12925e-12		149	Hmgn3	-0.727635	4.57855e-10						149	Tusc3	down	ns	N/A	N/A
150	Farp1	0.790157	1.21297e-12		150	H3f3b	-0.727131	4.77105e-10						150	Snca	down	ns	N/A	N/A
151	Syt3	-0.789253	1.3402e-12		151	Pcnp	-0.727068	4.79564e-10						151	Scn1b	up	ns	N/A	N/A
152	Lin7c	0.788881	1.39612e-12		152	Capns1	0.726841	4.88487e-10						152	Kcnab2	up	ns	N/A	N/A
153	Pgap1	0.788689	1.42574e-12		153	Prxl2b	0.725498	5.44778e-10						153	Kcnk1	up	ns	N/A	N/A
154	Fndc4	-0.787077	1.70032e-12		154	Lrrc20	0.724941	5.69855e-10						154	Thy1	up	ns	N/A	N/A
155	Paqr4	-0.786863	1.74032e-12		155	Stip1	0.724848	5.74127e-10						155	Mbnl1	up	ns	N/A	N/A
156	Endod1	-0.786142	1.88187e-12		156	Dctn4	-0.724687	5.81659e-10						156	Pura	up	ns	N/A	N/A
157	Got1	-0.786086	1.89328e-12		157	Smim12	0.724198	6.05015e-10						157	Syt2	up	ns	N/A	N/A
158	Slc39a6	0.785603	1.99469e-12		158	Nckipsd	0.722559	6.89985e-10						158	Syp	up	ns	N/A	N/A
159	Ywhae	0.785382	2.04278e-12		159	Necab3	0.72209	7.16354e-10						159	Dchs1	down	ns	N/A	N/A
160	1500009L16Rik	0.784951	2.13976e-12		160	Psmc3	0.721203	7.68718e-10						160	Itm2c	up	ns	N/A	N/A
161	Hap1	0.784058	2.35493e-12		161	Cacybp	-0.720234	8.30152e-10						161	Dpysl5	down	ns	N/A	N/A
162	Snph	-0.783436	2.51697e-12		162	Gm17201	0.719625	8.71046e-10						162	Neo1	down	ns	N/A	N/A
163	Purb	-0.783046	2.6237e-12		163	Fubp1	-0.719479	8.81143e-10						163	Prmt2	down	ns	N/A	N/A
164	Bzw2	0.780554	3.41488e-12		164	Ap1b1	0.719184	9.01876e-10						164	Gas6	up	ns	N/A	N/A
165	Prpf19	-0.78015	3.56269e-12		165	Ctxn2	-0.719059	9.10801e-10						165	Fth1	up	ns	N/A	N/A
166	Scn3b	0.779948	3.63927e-12		166	Camta2	0.718356	9.62551e-10						166	Cacna2d1	down	ns	N/A	N/A
167	Gm3687	0.77902	4.00972e-12		167	Tomm40	0.717683	1.01466e-09						167	Trnp1	up	ns	N/A	N/A
168	Syt16	0.778793	4.10571e-12		168	Clstn3	0.716842	1.08359e-09						168	Vim	down	ns	N/A	N/A
169	Eef1e1	0.777943	4.48488e-12		169	Zyx	0.716281	1.13193e-09						169	Fgf1	up	ns	N/A	N/A
170	Septin3	0.777376	4.75577e-12		170	Mmp15	0.715101	1.24046e-09						170	Sv2b	up	ns	N/A	N/A
171	Ghitm	-0.777175	4.85586e-12		171	Acot7	0.714827	1.26706e-09						171	Pacsin1	up	ns	N/A	N/A
172	Mapre1	0.776905	4.99272e-12		172	Camk2b	0.714723	1.27731e-09						172	Syngr1	up	ns	N/A	N/A
173	Tmx1	0.776666	5.11761e-12		173	Adam11	0.714677	1.28185e-09						173	Ywhag	up	ns	N/A	N/A
174	Dexi	-0.775811	5.58713e-12		174	Tpgs1	0.713477	1.4061e-09						174	Psd	down	ns	N/A	N/A
175	S100b	-0.775628	5.69318e-12		175	Jph3	0.713456	1.40835e-09						175	Hes1	up	ns	N/A	N/A
176	Eif5a2	-0.775077	6.0233e-12		176	Trip12	-0.713032	1.45489e-09						176	Myadm	down	ns	N/A	N/A
177	Calm1	-0.775028	6.05386e-12		177	Kdelr2	-0.712709	1.49145e-09						177	Taf9b	down	ns	N/A	N/A
178	Atp2a2	-0.774943	6.10628e-12		178	Pbrm1	-0.711432	1.64437e-09						178	Cplx1	up	ns	N/A	N/A
179	Elovl2	0.774889	6.14002e-12		179	Srpk2	-0.711077	1.68944e-09						179	Adora1	up	ns	N/A	N/A
180	Stx7	0.773939	6.76344e-12		180	Iqsec2	0.71043	1.77448e-09						180	Ttll7	up	ns	N/A	N/A
181	Tmem91	0.771979	8.24547e-12		181	Actb	-0.709095	1.96315e-09						181	Uhmk1	up	ns	N/A	N/A
182	Glul	-0.771877	8.33046e-12		182	Sec22b	-0.708686	2.02478e-09						182	Inpp5j	up	ns	N/A	N/A
183	Ccdc92	-0.771475	8.67387e-12		183	Tmem38a	0.708648	2.0305e-09						183	L1cam	down	ns	N/A	N/A
184	Rnf128	-0.77141	8.73025e-12		184	Cnot9	-0.707734	2.17492e-09						184	Coch	down	ns	N/A	N/A
185	Deaf1	0.770842	9.24144e-12		185	Fam98a	0.707695	2.18133e-09						185	Mpc2	up	ns	N/A	N/A
186	Rala	0.770654	9.41644e-12		186	Hnrnph1	-0.707464	2.2194e-09						186	Slc6a6	down	ns	N/A	N/A
187	Tom1l2	-0.770341	9.71536e-12		187	Dnm1	0.706113	2.45534e-09						187	Scn9a	down	ns	N/A	N/A
188	Ngfr	0.770041	1.00104e-11		188	Adam15	0.705431	2.58332e-09						188	Farp1	down	ns	N/A	N/A
189	Agfg2	-0.76926	1.08189e-11		189	Skil	-0.705226	2.62289e-09						189	Lin7c	down	ns	N/A	N/A
190	Agpat3	-0.76907	1.10241e-11		190	Med13l	-0.704255	2.8186e-09						190	Pgap1	down	ns	N/A	N/A
191	Ydjc	0.7677	1.26213e-11		191	Hnrnpdl	-0.704022	2.86753e-09						191	Slc39a6	down	ns	N/A	N/A
192	Suclg1	-0.766467	1.42452e-11		192	Cntnap1	0.701861	3.36196e-09						192	Hap1	down	ns	N/A	N/A
193	Prrt1	-0.766375	1.43739e-11		193	Nacad	0.701469	3.45968e-09						193	Bzw2	down	ns	N/A	N/A
194	Scn8a	-0.766344	1.44181e-11		194	Ctsd	0.701266	3.51141e-09						194	Prpf19	up	ns	N/A	N/A
195	Flna	0.766343	1.44193e-11		195	Sars	0.700301	3.76746e-09						195	S100b	up	ns	N/A	N/A
196	Inpp5f	0.766195	1.46299e-11		196	Pnkd	0.700126	3.81589e-09						196	Atp2a2	up	ns	N/A	N/A
197	Kidins220	0.766047	1.48416e-11		197	Zfp638	-0.699786	3.91113e-09						197	Glul	up	ns	N/A	N/A
198	Tmem176b	0.765339	1.59024e-11		198	Cnbd2	0.699115	4.10635e-09						198	Deaf1	down	ns	N/A	N/A
199	Tspan13	0.764422	1.7384e-11		199	Ap2s1	0.69848	4.29948e-09						199	Rala	down	ns	N/A	N/A
200	Cacng4	0.763693	1.86538e-11		200	Slc22a17	0.698039	4.43857e-09						200	Ngfr	down	ns	N/A	N/A
201	Ypel3	-0.763487	1.90273e-11		201	Cx3cl1	0.697507	4.61196e-09						201	Scn8a	up	ns	N/A	N/A
202	Aldoa	-0.763077	1.97945e-11		202	Inpp4a	-0.696328	5.01921e-09						202	Flna	down	ns	N/A	N/A
203	Tacc1	-0.763061	1.98247e-11		203	Tmem126a	-0.696152	5.08294e-09						203	Inpp5f	down	ns	N/A	N/A
204	Mycn	0.762531	2.08604e-11		204	Capn1	0.696084	5.10791e-09						204	Kidins220	down	ns	N/A	N/A
205	Rap1b	0.761219	2.36492e-11		205	Chmp1a	0.695989	5.14272e-09						205	Cacng4	down	ns	N/A	N/A
206	Srsf12	0.761005	2.41374e-11		206	Mapk8ip3	0.695141	5.46376e-09						206	Tacc1	up	ns	N/A	N/A
207	Nrep	0.75985	2.6935e-11		207	Tmem263	-0.694819	5.59025e-09						207	Rap1b	down	ns	N/A	N/A
208	Prps1	0.759575	2.76471e-11		208	Hsf2	-0.694446	5.74059e-09						208	Nrep	down	ns	N/A	N/A
209	Tmem191c	0.759505	2.78295e-11		209	Klhl42	-0.694428	5.74786e-09						209	Prps1	down	ns	N/A	N/A
210	Gm11895	0.759482	2.78896e-11		210	H4c8	0.694352	5.77902e-09						210	Nfasc	up	ns	N/A	N/A
211	Nfasc	-0.75866	3.01413e-11		211	Rab3a	0.694225	5.83156e-09						211	Adarb1	up	ns	N/A	N/A
212	Mllt11	0.758473	3.06741e-11		212	Nucks1	-0.692833	6.43588e-09						212	Fgf13	down	ns	N/A	N/A
213	Zfp704	0.758226	3.13957e-11		213	Tufm	0.69201	6.82026e-09						213	Ogdh	up	ns	N/A	N/A
214	Serpine2	0.75756	3.34228e-11		214	Cpne6	0.691512	7.06338e-09						214	Mkrn3	down	ns	N/A	N/A
215	Adarb1	-0.757295	3.42616e-11		215	Gm11613	0.690287	7.69661e-09						215	Atp8a1	down	ns	N/A	N/A
216	Fgf13	0.757219	3.45069e-11		216	Stxbp1	0.689772	7.97816e-09						216	Sox4	down	ns	N/A	N/A
217	Ogdh	-0.756304	3.75808e-11		217	Mreg	-0.689217	8.2932e-09						217	Hdgfl3	down	ns	N/A	N/A
218	Snx16	0.75619	3.7981e-11		218	Gm7209	0.688573	8.67305e-09						218	Mapk10	up	ns	N/A	N/A
219	Nr1d2	-0.756122	3.8223e-11		219	Abcd2	0.688416	8.76812e-09						219	Camk4	down	ns	N/A	N/A
220	Abcb9	-0.755451	4.06819e-11		220	Pwwp2b	0.687593	9.28254e-09						220	Sox8	up	ns	N/A	N/A
221	St8sia1	-0.755116	4.19663e-11		221	Calm2	-0.687414	9.39766e-09						221	Cspg5	down	ns	N/A	N/A
222	Bcl6	-0.754565	4.41578e-11		222	Nck2	-0.687313	9.46368e-09						222	Dclk1	down	ns	N/A	N/A
223	Asb13	-0.754537	4.42739e-11		223	Carmil2	0.686876	9.75391e-09						223	Bex1	down	ns	N/A	N/A
224	Basp1	0.754258	4.54283e-11		224	Qk	-0.686343	1.01187e-08						224	Nexn	up	ns	N/A	N/A
225	D430019H16Rik	0.753961	4.66899e-11		225	Sqstm1	0.686183	1.02306e-08						225	Fabp7	down	ns	N/A	N/A
226	Mkrn3	0.753146	5.03219e-11		226	Grid2ip	0.686158	1.02484e-08						226	Micu2	down	ns	N/A	N/A
227	Atp8a1	0.751851	5.66503e-11		227	Gadd45b	0.68598	1.03746e-08						227	Rims3	down	ns	N/A	N/A
228	Extl2	-0.751668	5.76029e-11		228	Arhgef4	0.685892	1.0437e-08						228	Sorl1	up	ns	N/A	N/A
229	Sox4	0.750992	6.12536e-11		229	Dipk1b	0.684911	1.11635e-08						229	Acsl6	up	ns	N/A	N/A
230	Ddah1	0.75095	6.14871e-11		230	Cacng2	0.68477	1.12713e-08						230	Cdh11	down	ns	N/A	N/A
231	Zfp385a	-0.749219	7.19071e-11		231	Vav3	0.684452	1.15191e-08						231	Tmsb4x	down	ns	N/A	N/A
232	Tcea2	-0.748578	7.61757e-11		232	Adcy9	0.684252	1.16777e-08						232	Slc16a1	up	ns	N/A	N/A
233	Hdgfl3	0.748149	7.91593e-11		233	Psma1	-0.683441	1.23418e-08						233	Tgfbr1	down	ns	N/A	N/A
234	Rsph9	0.747872	8.11537e-11		234	Hdlbp	0.682861	1.28374e-08						234	Plxnc1	down	ns	N/A	N/A
235	Vgf	-0.746805	8.92623e-11		235	Tle5	0.68282	1.28738e-08						235	Camk1d	up	ns	N/A	N/A
236	Plk2	0.745695	9.85123e-11		236	Dhcr24	0.682731	1.29512e-08						236	Rab10	down	ns	N/A	N/A
237	Mapk10	-0.745463	1.0056e-10		237	Gm23347	-0.682632	1.30388e-08						237	Plp1	up	ns	N/A	N/A
238	Srxn1	-0.745154	1.03344e-10		238	Mapre3	0.682536	1.31236e-08						238	Macroh2a2	down	ns	N/A	N/A
239	Fndc5	-0.745101	1.03826e-10		239	Bad	0.682444	1.32062e-08						239	Cox17	up	ns	N/A	N/A
240	Isyna1	0.744	1.14404e-10		240	Cabp1	0.682323	1.33143e-08						240	Smarca1	down	ns	N/A	N/A
241	Camk4	0.743586	1.18648e-10		241	Txndc5	0.681727	1.38627e-08						241	Atp2b1	down	ns	N/A	N/A
242	Pard6g	0.742319	1.32552e-10		242	Adap1	0.680371	1.519e-08						242	Cnih2	down	ns	N/A	N/A
243	Cenpw	0.741953	1.36852e-10		243	Hypk	-0.68036	1.52013e-08						243	Ache	up	ns	N/A	N/A
244	Sox8	-0.741807	1.38598e-10		244	5730409E04Rik	0.67983	1.57517e-08						244	Gria2	down	ns	N/A	N/A
245	Gsta4	-0.741782	1.38906e-10		245	Sh3glb2	0.679552	1.60482e-08						245	Ncam1	down	ns	N/A	N/A
246	Chga	-0.741626	1.40797e-10		246	Vsig8	0.679128	1.65103e-08						246	Zfp580	down	ns	N/A	N/A
247	Cspg5	0.741056	1.47941e-10		247	Hdac2	-0.678908	1.67546e-08						247	Scn2a	down	ns	N/A	N/A
248	Mea1	0.740811	1.51117e-10		248	Men1	0.678524	1.71905e-08						248	Ptprf	down	ns	N/A	N/A
249	Gas5	0.740777	1.51572e-10		249	Mthfsd	0.67772	1.8137e-08						249	Nptn	up	ns	N/A	N/A
250	Arpc5	0.740576	1.54226e-10		250	Guk1	0.677292	1.86597e-08						250	Sh3kbp1	down	ns	N/A	N/A
251	Setbp1	0.740174	1.59683e-10		251	Yars	0.677264	1.86952e-08						251	Kdm7a	up	ns	N/A	N/A
252	Nln	0.740115	1.60507e-10		252	Yme1l1	-0.676096	2.02003e-08						252	Scn1a	up	ns	N/A	N/A
253	Gm13456	0.739911	1.63346e-10		253	Pctp	0.675962	2.038e-08						253	Fkbp4	up	ns	N/A	N/A
254	Txndc17	0.739828	1.64527e-10		254	Mfap1b	-0.675747	2.06712e-08						254	Ntf3	down	ns	N/A	N/A
255	Stk32b	0.739494	1.69331e-10		255	Tial1	-0.675309	2.12777e-08						255	Slc20a1	up	ns	N/A	N/A
256	Dclk1	0.739278	1.72514e-10		256	Jcad	0.675267	2.13361e-08						256	Pcdha2	down	ns	N/A	N/A
257	Atg12	0.738909	1.78076e-10		257	Slc8a3	0.674543	2.2377e-08						257	Shisa7	down	ns	N/A	N/A
258	Rpl15	0.737314	2.04114e-10		258	Trpc4ap	0.674354	2.26574e-08						258	Atp1b1	up	ns	N/A	N/A
259	Arxes1	0.736934	2.10826e-10		259	Chuk	-0.674131	2.29907e-08						259	Kcnh2	up	ns	N/A	N/A
260	Bex1	0.736711	2.14866e-10		260	C2cd2l	0.673897	2.33476e-08						260	Maged2	down	ns	N/A	N/A
261	Samd8	0.73653	2.18198e-10		261	Stk24	0.673093	2.46088e-08						261	Pafah1b3	down	ns	N/A	N/A
262	Nexn	-0.736407	2.205e-10		262	4930402H24Rik	-0.673002	2.47556e-08						262	Grm3	down	ns	N/A	N/A
263	Eef1b2	0.736102	2.26284e-10		263	Evi5l	0.67284	2.50198e-08						263	Slc10a4	up	ns	N/A	N/A
264	Fabp7	0.736084	2.26616e-10		264	Gm15564	0.672461	2.56449e-08						264	Slc30a10	down	ns	N/A	N/A
265	Plac8	0.735797	2.32214e-10		265	Ap2a1	0.672432	2.56933e-08						265	Atp2c1	down	ns	N/A	N/A
266	Zdhhc2	0.735669	2.34746e-10		266	Dusp14	0.67235	2.58321e-08						266	Mbp	up	ns	N/A	N/A
267	Fscn1	0.73507	2.46935e-10		267	Chac1	0.672037	2.63642e-08						267	Ccdc88a	down	ns	N/A	N/A
268	Reg3b	0.734958	2.49272e-10		268	Nipsnap2	-0.671772	2.68224e-08						268	Nav2	down	ns	N/A	N/A
269	Micu2	0.73475	2.53692e-10		269	Tns1	0.670014	3.00604e-08						269	Kif2a	down	ns	N/A	N/A
270	Rims3	0.73422	2.65263e-10		270	Adam10	-0.669919	3.02449e-08						270	Islr2	down	ns	N/A	N/A
271	Sh3bp5	0.733913	2.72195e-10		271	6720483E21Rik	0.669123	3.18378e-08						271	Mapt	down	ns	N/A	N/A
272	Sorl1	-0.733848	2.73682e-10		272	P2rx6	0.669103	3.18787e-08						272	Psap	up	ns	N/A	N/A
273	Acsl6	-0.733253	2.87687e-10		273	Slc16a6	0.669033	3.20234e-08						273	Akap5	down	ns	N/A	N/A
274	Nacc2	-0.733156	2.90034e-10		274	Mapk12	0.667538	3.52486e-08						274	Rcc2	up	ns	N/A	N/A
275	Cdh11	0.733087	2.91715e-10		275	Gga1	0.666996	3.64908e-08						275	Klf7	down	ns	N/A	N/A
276	Ccdc28a	-0.733048	2.92671e-10		276	Atp2b2	0.666084	3.86756e-08						276	Ugt8a	up	ns	N/A	N/A
277	Crebl2	-0.732934	2.95466e-10		277	Lratd1	-0.665506	4.01235e-08						277	Ncor2	up	ns	N/A	N/A
278	Ppp1r1c	0.732696	3.01422e-10		278	Slc2a6	0.66488	4.17472e-08						278	Nap1l1	up	ns	N/A	N/A
279	Pacsin2	-0.732343	3.1043e-10		279	Ankrd13c	-0.664483	4.28094e-08						279	Arf4	down	ns	N/A	N/A
280	Tmsb4x	0.731242	3.40194e-10		280	Chd1	-0.663627	4.51878e-08						280	Bcan	up	ns	N/A	N/A
281	1500009C09Rik	-0.730882	3.50511e-10		281	Gm8121	-0.662895	4.73195e-08						281	Bin1	up	ns	N/A	N/A
282	Slc16a1	-0.730871	3.50832e-10		282	Bmp2k	-0.662565	4.83133e-08						282	Nptxr	down	ns	N/A	N/A
283	Tgfbr1	0.730537	3.60687e-10		283	Bclaf1	-0.661971	5.01482e-08						283	Glipr2	down	ns	N/A	N/A
284	Dkkl1	0.730464	3.62868e-10		284	Crls1	-0.661876	5.04478e-08						284	Trappc4	down	ns	N/A	N/A
285	Plxnc1	0.730183	3.71397e-10		285	Scx	0.661668	5.11085e-08						285	Rhou	down	ns	N/A	N/A
286	Clec2l	-0.730022	3.76373e-10		286	Tnpo2	0.66118	5.26913e-08						286	B4galt2	down	ns	N/A	N/A
287	Ndrg3	-0.729975	3.77815e-10		287	Disp2	0.661128	5.28619e-08						287	Stx1a	down	ns	N/A	N/A
288	Camk1d	-0.729882	3.80733e-10		288	Ppfia2	-0.65995	5.68921e-08						288	Top2b	down	ns	N/A	N/A
289	Fndc10	-0.729725	3.85706e-10		289	Caskin1	0.659442	5.87165e-08						289	Caprin1	down	ns	N/A	N/A
290	Garnl3	0.729526	3.92078e-10		290	Fgfr1	0.659371	5.8976e-08						290	Nol3	up	ns	N/A	N/A
291	Fbn2	0.728769	4.17264e-10		291	Fam76b	-0.658453	6.24246e-08						291	Cask	down	ns	N/A	N/A
292	Ptpn9	0.728687	4.2006e-10		292	Arf3	0.658002	6.419e-08						292	Atp6v1b2	up	ns	N/A	N/A
293	B3glct	0.728142	4.39269e-10		293	Get3	0.657842	6.48272e-08						293	H1f0	up	ns	N/A	N/A
294	Rab10	0.72787	4.49157e-10		294	Arhgap44	-0.657539	6.60482e-08						294	Cltc	up	ns	N/A	N/A
295	Tlcd3b	-0.727463	4.64355e-10		295	Trim37	0.657494	6.62349e-08						295	Id2	down	ns	N/A	N/A
296	Fam171a1	0.726946	4.84348e-10		296	Ankrd34a	0.657425	6.65162e-08						296	Cntn2	up	ns	N/A	N/A
297	Anapc5	0.726818	4.89407e-10		297	Cltb	0.657214	6.73863e-08						297	Scai	down	ns	N/A	N/A
298	Sptb	-0.726733	4.92805e-10		298	Gpx4	0.656724	6.94472e-08						298	Rnd2	up	ns	N/A	N/A
299	Cnn3	0.726387	5.0688e-10		299	Abcf1	0.656722	6.94563e-08						299	Glrb	up	ns	N/A	N/A
300	Ypel4	-0.726026	5.21933e-10		300	Lars2	0.656636	6.98259e-08						300	Stc1	down	ns	N/A	N/A
301	Plp1	-0.725744	5.34015e-10		301	Ino80	-0.655957	7.27951e-08						301	Ptprr	down	ns	N/A	N/A
302	Macroh2a2	0.72534	5.5177e-10		302	Acot2	-0.65569	7.39966e-08						302	Kdm2b	down	ns	N/A	N/A
303	Cox17	-0.725144	5.60586e-10		303	Ubxn2b	-0.655398	7.53276e-08						303	Grm5	down	ns	N/A	N/A
304	Smarca1	0.724934	5.70157e-10		304	Slc4a3	0.654863	7.78315e-08						304	Rerg	up	ns	N/A	N/A
305	Atp2b1	0.724671	5.82383e-10		305	Gm2986	-0.65408	8.16352e-08						305	Ptma	down	ns	N/A	N/A
306	Zscan18	0.724198	6.05047e-10		306	Mpnd	0.654051	8.17779e-08						306	Mboat7	down	ns	N/A	N/A
307	Stmn4	0.72354	6.37903e-10		307	Lsm11	0.653563	8.42425e-08						307	Asph	up	ns	N/A	N/A
308	Sucla2	-0.723439	6.43078e-10		308	Lztfl1	-0.653207	8.60821e-08						308	Srcin1	down	ns	N/A	N/A
309	Traf3	-0.723364	6.46965e-10		309	Mapk8ip1	0.653002	8.71601e-08						309	Slit2	down	ns	N/A	N/A
310	Adamtsl5	-0.723312	6.49632e-10		310	Ccng1	-0.652732	8.85943e-08						310	Ctnnd2	down	ns	N/A	N/A
311	Ndufa4	-0.722992	6.66501e-10		311	Klc2	0.652698	8.87792e-08						311	Cdkn1c	down	ns	N/A	N/A
312	Cnih2	0.722824	6.75555e-10		312	Igsf9b	0.652654	8.90158e-08						312	Astn1	down	ns	N/A	N/A
313	Ache	-0.722551	6.90431e-10		313	Amer1	0.651824	9.35943e-08						313	Pink1	up	ns	N/A	N/A
314	Fabp5	0.722015	7.20638e-10		314	Tia1	-0.650515	1.01268e-07						314	Cpne5	down	ns	N/A	N/A
315	Smim17	-0.721887	7.27997e-10		315	Npdc1	0.650148	1.03523e-07						315	Prkaca	up	ns	N/A	N/A
316	Psd2	0.721838	7.30854e-10		316	Six4	0.649277	1.09066e-07						316	Dusp15	up	ns	N/A	N/A
317	2310061I04Rik	-0.721764	7.35185e-10		317	Cndp2	0.649182	1.09688e-07						317	Nisch	down	ns	N/A	N/A
318	Ttc9b	0.721733	7.37014e-10		318	Urm1	0.64836	1.15202e-07						318	Slc25a22	up	ns	N/A	N/A
319	Gria2	0.720903	7.87262e-10		319	Rrn3	-0.648323	1.15458e-07						319	Isl1	down	ns	N/A	N/A
320	Prdx5	-0.720584	8.07414e-10		320	Bola2	0.648113	1.16909e-07						320	Pomgnt2	up	ns	N/A	N/A
321	Ncam1	0.720321	8.24448e-10		321	Pcgf6	-0.648003	1.17675e-07						321	Flrt3	down	ns	N/A	N/A
322	Cct4	0.720281	8.27058e-10		322	Pianp	0.647802	1.19091e-07						322	Slc1a2	up	ns	N/A	N/A
323	Gmpr	-0.719569	8.74935e-10		323	Cox7b2	0.647704	1.19792e-07						323	Hcn2	up	ns	N/A	N/A
324	Adamts15	0.719436	8.84106e-10		324	Rfx3	-0.647148	1.23813e-07						324	Atat1	down	ns	N/A	N/A
325	Plppr1	0.719374	8.88456e-10		325	Atp1a3	0.646934	1.25389e-07						325	Ddx3x	up	ns	N/A	N/A
326	Ldlr	-0.719196	9.00996e-10		326	Fbxo31	0.646369	1.29659e-07						326	Sema4g	down	ns	N/A	N/A
327	Chic1	-0.719177	9.02348e-10		327	Lancl1	0.646316	1.30066e-07						327	Sema4f	down	ns	N/A	N/A
328	Tdrp	-0.719064	9.10423e-10		328	Adrb3	0.646265	1.3046e-07						328	Dll3	down	ns	N/A	N/A
329	Tceal3	-0.718821	9.28029e-10		329	Zfyve28	0.645945	1.32947e-07						329	Pcdh8	down	ns	N/A	N/A
330	Arf5	-0.718758	9.32612e-10		330	Rad21	-0.645927	1.33091e-07						330	Slc35b1	down	ns	N/A	N/A
331	Zfp580	0.71845	9.55457e-10		331	Tspyl1	-0.645433	1.37023e-07						331	Cdh8	down	ns	N/A	N/A
332	Dffa	-0.718067	9.84632e-10		332	Pgls	0.645408	1.37226e-07						332	Mpp2	down	ns	N/A	N/A
333	Scn2a	0.716967	1.07301e-09		333	Syde1	0.645307	1.38051e-07						333	Fitm2	up	ns	N/A	N/A
334	Bloc1s2	0.716328	1.1278e-09		334	Tuba1b	0.645189	1.3901e-07						334	Ank1	up	ns	N/A	N/A
335	Fh1	-0.715958	1.16071e-09		335	AI837181	0.644939	1.41072e-07						335	Nedd4l	down	ns	N/A	N/A
336	Abhd17c	0.715404	1.21171e-09		336	Tnni3k	0.643524	1.53286e-07						336	Syt9	down	ns	N/A	N/A
337	Ptprf	0.715151	1.2357e-09		337	Ccdc74a	0.643201	1.56218e-07						337	Racgap1	down	ns	N/A	N/A
338	Bbip1	0.714302	1.31947e-09		338	Ttc1	0.642722	1.60652e-07						338	Fa2h	up	ns	N/A	N/A
339	Pdk2	-0.714237	1.32614e-09		339	Pou6f1	0.642254	1.65089e-07						339	Ndrg4	up	ns	N/A	N/A
340	Cuta	-0.713976	1.35304e-09		340	B4galnt1	0.641295	1.7457e-07						340	Pbx1	down	ns	N/A	N/A
341	Hsbp1	0.713966	1.35414e-09		341	Igsf8	0.641136	1.76189e-07						341	Ccl2	down	ns	N/A	N/A
342	Nptn	-0.713549	1.39827e-09		342	Cmpk1	-0.641046	1.77103e-07						342	Slc7a14	up	ns	N/A	N/A
343	Sidt1	0.713175	1.43905e-09		343	Map4	-0.640502	1.82785e-07						343	Cthrc1	down	ns	N/A	N/A
344	Lrrc3	0.712801	1.48097e-09		344	Dip2c	-0.640344	1.84457e-07						344	Nr3c1	up	ns	N/A	N/A
345	Map4k2	-0.712528	1.51225e-09		345	Ncoa3	-0.639366	1.95184e-07						345	Sipa1l1	up	ns	N/A	N/A
346	Ralgds	0.71222	1.54831e-09		346	Slc35d3	0.63924	1.96611e-07						346	Mapk8ip2	up	ns	N/A	N/A
347	Sh3kbp1	0.711662	1.6158e-09		347	Syvn1	0.63917	1.97402e-07						347	Kcnt2	down	ns	N/A	N/A
348	Syt4	0.711575	1.62655e-09		348	Frmd8	0.639108	1.98107e-07						348	Slc8a2	down	ns	N/A	N/A
349	Gm10074	0.711543	1.63048e-09		349	Fgfr2	0.639048	1.988e-07						349	Sdc3	down	ns	N/A	N/A
350	Ppcs	-0.711329	1.65729e-09		350	Fis1	0.63899	1.9946e-07						350	Cdc42ep5	down	ns	N/A	N/A
351	Gm21399	0.711246	1.66781e-09		351	Gpm6a	-0.638824	2.01375e-07						351	Dpy30	down	ns	N/A	N/A
352	Wsb2	0.71099	1.70066e-09		352	Tango2	0.638541	2.04683e-07						352	Pitpna	up	ns	N/A	N/A
353	Kdm7a	-0.710906	1.71146e-09		353	Rxra	0.638407	2.0626e-07						353	Kmt2a	down	ns	N/A	N/A
354	Rcn1	0.710741	1.73306e-09		354	Ggt7	0.637837	2.13129e-07						354	Doc2b	down	ns	N/A	N/A
355	Selenoh	0.7106	1.75178e-09		355	2010015M23Rik	0.637744	2.14269e-07						355	Kat6b	down	ns	N/A	N/A
356	Gnal	0.710305	1.79143e-09		356	Uchl4	-0.636871	2.25252e-07						356	Lrrn2	up	ns	N/A	N/A
357	Magel2	0.7101	1.81951e-09		357	Rbm15	-0.636746	2.26866e-07						357	Nedd4	down	ns	N/A	N/A
358	Scn1a	-0.709884	1.84954e-09		358	Atp7b	-0.636698	2.27488e-07						358	Sirt2	up	ns	N/A	N/A
359	Fkbp4	-0.709391	1.91974e-09		359	Dennd5b	-0.636408	2.31278e-07						359	Chd3	down	ns	N/A	N/A
360	Eps8	0.709134	1.95742e-09		360	Glg1	0.636166	2.3449e-07						360	Nlgn3	down	ns	N/A	N/A
361	Ntf3	0.708647	2.0307e-09		361	Cant1	0.635905	2.38015e-07						361	Shank2	down	ns	N/A	N/A
362	Slc20a1	-0.708279	2.08772e-09		362	Hspb6	0.635662	2.41321e-07						362	Palmd	up	ns	N/A	N/A
363	S100a11	0.708158	2.10686e-09		363	Htra1	0.635547	2.42904e-07						363	Slc9b2	down	ns	N/A	N/A
364	Ccdc82	0.706476	2.38972e-09		364	Nrxn2	0.635122	2.48857e-07						364	Synj1	up	ns	N/A	N/A
365	Tuba1a	0.706127	2.45276e-09		365	Pcmtd2	-0.63498	2.50871e-07						365	Nyap2	down	ns	N/A	N/A
366	Pcdha2	0.706043	2.46825e-09		366	Csdc2	0.634355	2.5991e-07						366	Saraf	down	ns	N/A	N/A
367	Shisa7	0.705363	2.59626e-09		367	Marchf2	0.634227	2.61806e-07						367	Dnmt3a	up	ns	N/A	N/A
368	Glo1	-0.705036	2.6601e-09		368	Gm10710	0.632797	2.83821e-07						368	Hmgb1	down	ns	N/A	N/A
369	Atp1b1	-0.704829	2.70138e-09		369	Sec14l1	0.632677	2.85758e-07						369	Kcna6	down	ns	N/A	N/A
370	Pgrmc1	0.704584	2.75079e-09		370	Yam1	0.632578	2.87358e-07						370	Mapk6	down	ns	N/A	N/A
371	Slc25a33	-0.704583	2.751e-09		371	Nol6	0.632536	2.88023e-07						371	Bag6	up	ns	N/A	N/A
372	Mpzl1	0.704247	2.82026e-09		372	Rogdi	0.632203	2.93469e-07						372	Scrt1	up	ns	N/A	N/A
373	Ldhb-ps	-0.70407	2.8574e-09		373	Dhx15	-0.632165	2.94098e-07						373	Gabra4	down	ns	N/A	N/A
374	Nxpe3	-0.704031	2.86574e-09		374	Nabp2	0.63194	2.97844e-07						374	Ophn1	down	ns	N/A	N/A
375	Pi4k2a	-0.703853	2.90371e-09		375	Mrps7	0.631935	2.97921e-07						375	Eml1	down	ns	N/A	N/A
376	Gm11560	0.703749	2.92602e-09		376	Tmem63b	0.631916	2.98244e-07						376	Flrt2	down	ns	N/A	N/A
377	Apol6	-0.703531	2.97341e-09		377	Mpzl3	0.631378	3.07382e-07						377	Cebpb	up	ns	N/A	N/A
378	Gabarapl1	-0.703516	2.9767e-09		378	Gm12350	0.631141	3.11494e-07						378	Kcnq3	down	ns	N/A	N/A
379	Ankrd35	-0.703326	3.01878e-09		379	Ube2o	0.630766	3.18095e-07						379	Cnp	up	ns	N/A	N/A
380	Kcnh2	-0.7031	3.06936e-09		380	Mrpl12	0.63048	3.23232e-07						380	Wasl	up	ns	N/A	N/A
381	Srsf3	0.702659	3.17071e-09		381	Pcbp4	0.63047	3.23411e-07						381	Fzd10	up	ns	N/A	N/A
382	Maged2	0.701952	3.33954e-09		382	Rbm4b	-0.630394	3.2479e-07						382	Mobp	up	ns	N/A	N/A
383	Runx1t1	0.700789	3.63598e-09		383	Wars	0.629917	3.33549e-07						383	Fxyd1	up	ns	N/A	N/A
384	Pafah1b3	0.700756	3.64454e-09		384	Mrpl2	0.629129	3.48507e-07						384	Kcnj3	up	ns	N/A	N/A
385	Grm3	0.700442	3.72897e-09		385	Ncln	0.629054	3.49958e-07						385	Slc7a8	up	ns	N/A	N/A
386	Rgs19	0.700413	3.7369e-09		386	Araf	-0.62866	3.57715e-07						386	Slc25a25	up	ns	N/A	N/A
387	Slc10a4	-0.70008	3.82845e-09		387	Kcnj14	0.628493	3.61035e-07						387	Slc9a1	up	ns	N/A	N/A
388	Miga2	-0.699322	4.04523e-09		388	Alg6	-0.628033	3.7036e-07						388	Grik3	down	ns	N/A	N/A
389	Nuak1	-0.698979	4.1471e-09		389	Rchy1	-0.627187	3.88105e-07						389	Lgals3	down	ns	N/A	N/A
390	Cdc37l1	-0.697887	4.48723e-09		390	Slc9a8	0.62673	3.98014e-07						390	Mag	up	ns	N/A	N/A
391	Ablim3	0.697527	4.60532e-09		391	Actn4	0.626234	4.09041e-07						391	Rps19	down	ns	N/A	N/A
392	Slc30a10	0.696642	4.90775e-09		392	Cyc1	0.62608	4.12512e-07						392	Bhlhb9	down	ns	N/A	N/A
393	Gng3	0.69655	4.94016e-09		393	Cdh22	0.626004	4.14239e-07						393	Ube2n	down	ns	N/A	N/A
394	Hpca	0.695949	5.15746e-09		394	Pak1	0.625538	4.24984e-07						394	Dnajc2	down	ns	N/A	N/A
395	Abhd3	-0.695367	5.37604e-09		395	Dync1li2	0.625359	4.29198e-07						395	Klk6	up	ns	N/A	N/A
396	Atp2c1	0.695306	5.39952e-09		396	Anxa4	0.624763	4.43435e-07						396	Ina	down	ns	N/A	N/A
397	Mbp	-0.69461	5.67411e-09		397	Ccnt2	-0.624402	4.52287e-07						397	Cacna1g	up	ns	N/A	N/A
398	Ccdc88a	0.694434	5.74559e-09		398	Klhdc3	0.624373	4.53011e-07						398	Mmd	down	ns	N/A	N/A
399	Grk3	0.694248	5.82214e-09		399	Gm16286	0.624358	4.53384e-07						399	Ttc3	down	ns	N/A	N/A
400	C1qtnf12	0.693936	5.95242e-09		400	Nans	0.624242	4.56252e-07						400	Taf9	down	ns	N/A	N/A
401	Fhl3	0.693193	6.27428e-09		401	Banp	0.623677	4.70564e-07						401	Sfpq	down	ns	N/A	N/A
402	Nav2	0.69203	6.81087e-09		402	Snhg11	-0.623588	4.72841e-07						402	Robo2	down	ns	N/A	N/A
403	Mt1	-0.69171	6.9659e-09		403	Rrp7a	0.62272	4.95714e-07						403	Atrx	down	ns	N/A	N/A
404	Kif2a	0.691312	7.16334e-09		404	Pdgfd	0.62199	5.15762e-07						404	Mad2l2	down	ns	N/A	N/A
405	Nfe2l1	-0.690322	7.67766e-09		405	Dync1i2	-0.621797	5.21193e-07						405	Plxna3	down	ns	N/A	N/A
406	Islr2	0.68982	7.95166e-09		406	Sp3	-0.621759	5.22272e-07						406	Nasp	down	ns	N/A	N/A
407	Mapt	0.689245	8.27684e-09		407	Pole4	-0.621733	5.23004e-07						407	Elp1	down	ns	N/A	N/A
408	Slc19a2	-0.688861	8.50111e-09		408	Cxxc5	0.621661	5.25045e-07						408	Bsn	down	ns	N/A	N/A
409	Lrrc58	0.688736	8.57517e-09		409	Slc25a36	-0.620767	5.51061e-07						409	Dcdc2a	down	ns	N/A	N/A
410	Gm9847	0.688658	8.62175e-09		410	Slc25a10	0.619853	5.78894e-07						410	Kcnj9	up	ns	N/A	N/A
411	Ttc39b	-0.688577	8.6702e-09		411	Lamtor4	0.61978	5.81157e-07						411	Rnf2	down	ns	N/A	N/A
412	Plppr5	0.688168	8.9201e-09		412	Zmiz2	0.619596	5.86925e-07						412	Efna2	down	ns	N/A	N/A
413	Rps3a1	0.687924	9.07233e-09		413	Polr2e	0.619512	5.89595e-07						413	Arc	up	ns	N/A	N/A
414	Tgoln1	-0.687898	9.08859e-09		414	Ppp1r11	0.61949	5.90283e-07						414	Dbndd2	up	ns	N/A	N/A
415	Cabp7	-0.687719	9.20172e-09		415	Rtbdn	0.619488	5.90368e-07						415	Ulk2	down	ns	N/A	N/A
416	Lpcat4	-0.687692	9.21923e-09		416	Akt1	0.619388	5.93528e-07						416	Trim62	down	ns	N/A	N/A
417	Galnt13	0.687629	9.25895e-09		417	Birc6	-0.619311	5.9601e-07						417	Rras2	down	ns	N/A	N/A
418	Psap	-0.6874	9.40709e-09		418	Slc7a1	0.618856	6.10742e-07						418	Fgf12	up	ns	N/A	N/A
419	Akap5	0.686867	9.75946e-09		419	Clcn5	0.618086	6.36437e-07						419	Omg	up	ns	N/A	N/A
420	Rcc2	-0.686386	1.00885e-08		420	Pbld2	0.617867	6.43937e-07						420	Ptprg	down	ns	N/A	N/A
421	Tspan3	-0.68635	1.01133e-08		421	Immp1l	-0.61767	6.50772e-07						421	Setd7	up	ns	N/A	N/A
422	Ube2m	-0.686333	1.01255e-08		422	Ppp3cb	-0.617328	6.62749e-07						422	Slc30a4	down	ns	N/A	N/A
423	Taf1d	0.68631	1.01416e-08		423	Hadha	0.617309	6.63435e-07						423	Tacr1	up	ns	N/A	N/A
424	Zfp575	0.686168	1.02408e-08		424	Gm20387	0.617278	6.64505e-07						424	Shroom2	down	ns	N/A	N/A
425	n-R5-8s1	-0.686089	1.02969e-08		425	Clta	0.616209	7.0345e-07						425	Akap13	down	ns	N/A	N/A
426	Sec61b	0.685986	1.03697e-08		426	Gprasp2	-0.615792	7.19186e-07						426	Alg2	down	ns	N/A	N/A
427	Esrra	-0.68573	1.05536e-08		427	Abhd17a	0.615199	7.42144e-07						427	Syt17	down	ns	N/A	N/A
428	Klf7	0.685605	1.06447e-08		428	Hook1	-0.614496	7.70255e-07						428	Phpt1	down	ns	N/A	N/A
429	Ugt8a	-0.685406	1.07913e-08		429	Tmem170b	-0.614469	7.71377e-07						429	Prkca	down	ns	N/A	N/A
430	Ncor2	-0.684826	1.12285e-08		430	Brd8	-0.614117	7.85825e-07						430	Slc25a12	up	ns	N/A	N/A
431	Hdac6	0.684764	1.12759e-08		431	R3hcc1	0.61405	7.88612e-07						431	Tspyl4	up	ns	N/A	N/A
432	Prkar1a	-0.684593	1.14093e-08		432	Eme2	0.613607	8.07261e-07						432	Car7	up	ns	N/A	N/A
433	Cd1d1	0.683696	1.21291e-08		433	Tor3a	0.613582	8.08322e-07						433	Il15ra	up	ns	N/A	N/A
434	Get1	0.683622	1.21907e-08		434	Plod1	0.613425	8.15019e-07						434	Gnaq	down	ns	N/A	N/A
435	Plppr4	0.683614	1.21972e-08		435	Mvb12a	0.612407	8.59808e-07						435	Psmd10	down	ns	N/A	N/A
436	Cpeb1	-0.683538	1.22602e-08		436	Srsf11	-0.612383	8.60887e-07						436	Hes6	down	ns	N/A	N/A
437	Nap1l1	-0.682885	1.28165e-08		437	Kmt5a	0.612358	8.62011e-07						437	Rcor1	up	ns	N/A	N/A
438	Arf4	0.682488	1.31669e-08		438	Larp1	0.612017	8.77561e-07						438	Arl6	down	ns	N/A	N/A
439	Bcan	-0.681669	1.39171e-08		439	Nudc	0.612001	8.78286e-07						439	Micu1	up	ns	N/A	N/A
440	Fam171b	0.680752	1.4805e-08		440	Rdh13	-0.61194	8.81113e-07						440	Kdm6b	up	ns	N/A	N/A
441	Bin1	-0.680693	1.48638e-08		441	Uqcr11	0.611854	8.85055e-07						441	Plin2	down	ns	N/A	N/A
442	Btbd8	0.680349	1.52117e-08		442	Slc19a1	0.610935	9.28604e-07						442	Crb2	down	ns	N/A	N/A
443	Cyb561d2	0.680261	1.53018e-08		443	Pgbd5	0.610677	9.41201e-07						443	Acvr1b	down	ns	N/A	N/A
444	Cryab	-0.679876	1.57034e-08		444	Nmt1	0.610287	9.60507e-07						444	Ano2	down	ns	N/A	N/A
445	B3galnt1	0.678794	1.68827e-08		445	Ehd3	0.610203	9.6475e-07						445	Sv2a	up	ns	N/A	N/A
446	Opalin	-0.678533	1.71803e-08		446	Atp6v1e1	0.609997	9.75113e-07						446	Actr3	down	ns	N/A	N/A
447	Gm8606	0.678334	1.74098e-08		447	Uba2	-0.609884	9.80862e-07						447	Smurf2	down	ns	N/A	N/A
448	Nsmce1	0.678097	1.76872e-08		448	Hk1os	0.609587	9.96151e-07						448	Scml2	down	ns	N/A	N/A
449	Magee2	0.67806	1.7731e-08		449	Tmed7	-0.609325	1.00979e-06						449	Scrt2	up	ns	N/A	N/A
450	Kctd15	-0.677855	1.7974e-08		450	Tmed10	-0.609285	1.01189e-06						450	Npm1	down	ns	N/A	N/A
451	Rps3	0.677409	1.85153e-08		451	Fubp3	-0.609261	1.01316e-06						451	Mtf2	down	ns	N/A	N/A
452	Ankra2	0.677298	1.86529e-08		452	Cptp	0.609106	1.02132e-06						452	Hey1	up	ns	N/A	N/A
453	Ltbp3	-0.676872	1.91881e-08		453	Fbxl3	-0.609049	1.02432e-06						453	Rap1gap	up	ns	N/A	N/A
454	Nptxr	0.67662	1.95113e-08		454	Cbln4	-0.608789	1.03821e-06						454	Trpc7	down	ns	N/A	N/A
455	Pkig	0.676095	2.02006e-08		455	Ddx5	-0.608672	1.04457e-06						455	Ddr1	up	ns	N/A	N/A
456	Ranbp6	-0.676026	2.02936e-08		456	Cpsf6	-0.60858	1.04953e-06						456	Vdac3	down	ns	N/A	N/A
457	Rtn1	0.675981	2.03541e-08		457	Ankrd52	0.608501	1.05381e-06						457	Gjd2	up	ns	N/A	N/A
458	Zbtb46	0.675257	2.13506e-08		458	Eef1d	0.608461	1.05602e-06						458	Slc9a6	down	ns	N/A	N/A
459	Habp4	-0.674919	2.18312e-08		459	Gm10762	0.608308	1.06441e-06						459	B3gnt5	down	ns	N/A	N/A
460	Gm24601	-0.674363	2.2644e-08		460	Tnfrsf21	0.60772	1.09725e-06						460	Cnih3	down	ns	N/A	N/A
461	Vash2	0.674145	2.29709e-08		461	Ube2b	-0.607343	1.11876e-06						461	Aplp1	down	ns	N/A	N/A
462	Gm26673	-0.673946	2.32719e-08		462	Zdhhc3	0.607332	1.1194e-06						462	Apba3	up	ns	N/A	N/A
463	Syt1	0.673925	2.33035e-08		463	Ltk	0.606721	1.15517e-06						463	Apbb2	down	ns	N/A	N/A
464	Enc1	0.673912	2.33246e-08		464	Spry2	-0.60664	1.16002e-06						464	Lck	down	ns	N/A	N/A
465	Inhbb	-0.673682	2.36779e-08		465	Ube2e3	-0.606087	1.19343e-06						465	Mcrs1	down	ns	N/A	N/A
466	Atp5mpl	-0.673028	2.47134e-08		466	Pfdn4	-0.605969	1.20065e-06						466	Clasp1	up	ns	N/A	N/A
467	Glipr2	0.672659	2.53161e-08		467	Luc7l3	-0.605946	1.20212e-06						467	Pllp	up	ns	N/A	N/A
468	Trappc4	0.672614	2.53911e-08		468	Rcor3	-0.605557	1.22628e-06						468	Sox12	down	ns	N/A	N/A
469	Rhou	0.672428	2.57001e-08		469	Mvk	0.605413	1.23536e-06						469	Elof1	down	ns	N/A	N/A
470	Dync1i1	-0.672046	2.63491e-08		470	Sh3rf1	-0.605034	1.25958e-06						470	Kcnq4	down	ns	N/A	N/A
471	Efr3b	-0.671656	2.70249e-08		471	Pip5k1c	0.605028	1.25997e-06						471	Gja1	down	ns	N/A	N/A
472	Emc9	-0.670824	2.85256e-08		472	Kcnj12	0.604855	1.27114e-06						472	B3gnt1	down	ns	N/A	N/A
473	Slc37a3	0.670553	2.90298e-08		473	Apln	0.604607	1.28736e-06						473	Trf	up	ns	N/A	N/A
474	B4galt2	0.670488	2.9152e-08		474	Dse	-0.604222	1.31293e-06						474	Timp1	down	ns	N/A	N/A
475	Gm20501	0.670433	2.9257e-08		475	Chpf	0.603773	1.3433e-06						475	Atp5pb	up	ns	N/A	N/A
476	Nfs1	-0.670329	2.94532e-08		476	Cgnl1	0.603165	1.3855e-06						476	Zfp423	down	ns	N/A	N/A
477	Cbx6	-0.670136	2.98232e-08		477	Nlgn2	0.602751	1.41493e-06						477	Slc6a8	up	ns	N/A	N/A
478	Grsf1	-0.669925	3.02336e-08		478	Amhr2	0.602688	1.41945e-06						478	Gnai1	down	ns	N/A	N/A
479	Tceal9	0.669819	3.04404e-08		479	Actr1b	0.60256	1.42867e-06						479	Slc25a37	up	ns	N/A	N/A
480	Dmp1	-0.668924	3.22491e-08		480	Mrps33	-0.602235	1.45242e-06						480	Efnb2	down	ns	N/A	N/A
481	Stx1a	0.668646	3.28302e-08		481	Lrsam1	0.602055	1.46571e-06						481	Gria4	up	ns	N/A	N/A
482	Psme2b	0.668331	3.35014e-08		482	Guf1	-0.602032	1.4674e-06						482	Grn	down	ns	N/A	N/A
483	Top2b	0.668159	3.38726e-08		483	Man2c1os	0.601426	1.5131e-06						483	Grm1	up	ns	N/A	N/A
484	Neto2	0.668011	3.4196e-08		484	Myt1l	-0.601186	1.53149e-06						484	Slc1a3	down	ns	N/A	N/A
485	Minar2	0.66791	3.4419e-08		485	Fam122a	0.601066	1.54084e-06						485	Zbtb18	up	ns	N/A	N/A
486	Hhatl	-0.667442	3.5464e-08		486	Bscl2	0.601027	1.54383e-06						486	Kcnk12	up	ns	N/A	N/A
487	Cerk	-0.667428	3.54975e-08		487	Uchl3	-0.600611	1.57655e-06						487	Myb	up	ns	N/A	N/A
488	Ap2a2	0.666208	3.83709e-08		488	Ipo4	0.600378	1.59521e-06						488	Dkk1	down	ns	N/A	N/A
489	Sult6b25	0.665537	4.00441e-08		489	BC049762	0.599326	1.68173e-06						489	Ldb2	down	ns	N/A	N/A
490	Plekhb2	-0.665296	4.06604e-08		490	Mzt2	0.599202	1.69227e-06						490	Oprm1	down	ns	N/A	N/A
491	Pfkm	-0.665184	4.09522e-08		491	Edem3	-0.599076	1.70294e-06						491	Slc39a14	up	ns	N/A	N/A
492	Hic2	0.665125	4.1104e-08		492	Gm16581	0.599048	1.70534e-06						492	Gng4	down	ns	N/A	N/A
493	Gm17066	0.664777	4.20204e-08		493	Zfp235	0.598324	1.76827e-06						493	Sema6d	down	ns	N/A	N/A
494	KCTD12	0.663847	4.45674e-08		494	Gm26631	-0.598044	1.79316e-06						494	Tac1	down	ns	N/A	N/A
495	Caprin1	0.663787	4.47363e-08		495	Tbkbp1	0.597979	1.799e-06						495	Evl	down	ns	N/A	N/A
496	Nol3	-0.663532	4.54611e-08		496	Rpa3	-0.597685	1.82559e-06						496	Ndrg1	down	ns	N/A	N/A
497	Map7d2	-0.663448	4.57028e-08		497	Coq9	0.597552	1.8378e-06						497	Sdk1	down	ns	N/A	N/A
498	Cspp1	0.663178	4.64868e-08		498	Ndufa10	0.597284	1.86247e-06						498	Csnk1d	up	ns	N/A	N/A
499	Cask	0.663156	4.655e-08		499	Vgll4	0.596994	1.88959e-06						499	Ctnna2	down	ns	N/A	N/A
500	Pde6d	0.662678	4.79696e-08		500	Usp19	0.596255	1.9602e-06						500	Coro1c	down	ns	N/A	N/A
501	Atp6v1b2	-0.66222	4.93687e-08		501	Tram1l1	-0.596236	1.96205e-06						501	Grin2c	up	ns	N/A	N/A
502	Phyhip	-0.661983	5.01089e-08		502	Arhgef17	0.596194	1.96617e-06						502	Elp5	down	ns	N/A	N/A
503	H1f0	-0.661969	5.01531e-08		503	Ano3	0.595531	2.03183e-06						503	Shank3	down	ns	N/A	N/A
504	Itpripl1	0.661622	5.12558e-08		504	Qpct	-0.59551	2.03396e-06						504	Oxtr	down	ns	N/A	N/A
505	Cltc	-0.661445	5.18267e-08		505	Zfp275	-0.595273	2.05796e-06						505	Cldn11	up	ns	N/A	N/A
506	Mblac2	0.661379	5.20416e-08		506	Uba52	0.595039	2.08189e-06						506	Dlg5	down	ns	N/A	N/A
507	Ikzf4	0.66135	5.2135e-08		507	E2f1	0.594996	2.08641e-06						507	Slc44a1	up	ns	N/A	N/A
508	Pdia6	0.660868	5.37268e-08		508	Macir	-0.594843	2.10218e-06						508	Dact3	up	ns	N/A	N/A
509	Id2	0.660719	5.42297e-08		509	Dner	-0.594508	2.13724e-06						509	Ephb1	down	ns	N/A	N/A
510	Cntn2	-0.660407	5.52954e-08		510	Rab1b	0.594267	2.16285e-06						510	Id4	down	ns	N/A	N/A
511	Afap1	0.659804	5.74096e-08		511	Sirpa	0.594148	2.17554e-06						511	Amigo3	up	ns	N/A	N/A
512	Ccdc85a	0.659701	5.77797e-08		512	Cdr1	0.593996	2.19188e-06						512	Dpysl4	down	ns	N/A	N/A
513	Nrip2	-0.659542	5.83533e-08		513	Trappc6b	-0.593912	2.20093e-06						513	Atp6v1a	up	ns	N/A	N/A
514	Gpr62	-0.658952	6.0525e-08		514	Mtx2	-0.593414	2.2556e-06						514	Doc2a	down	ns	N/A	N/A
515	Gdpd1	0.658161	6.35626e-08		515	Prdx6	0.592935	2.30925e-06						515	Pex2	down	ns	N/A	N/A
516	Dpy19l1	0.658123	6.37117e-08		516	Tbc1d10b	0.592901	2.31314e-06						516	Smyd1	up	ns	N/A	N/A
517	Acan	-0.657841	6.48325e-08		517	Tmtc1	0.592435	2.36654e-06						517	Msn	up	ns	N/A	N/A
518	Pacs1	0.657612	6.57531e-08		518	Bod1	0.592132	2.40194e-06						518	Ptpro	down	ns	N/A	N/A
519	Scai	0.657139	6.76966e-08		519	Lsm12	-0.591921	2.42689e-06						519	Steap1	down	ns	N/A	N/A
520	Mypop	-0.657083	6.79305e-08		520	Pld6	-0.591658	2.45826e-06						520	Gas2l1	up	ns	N/A	N/A
521	Rassf8	-0.656919	6.86186e-08		521	Cog4	0.5916	2.46532e-06						521	Arcn1	down	ns	N/A	N/A
522	Coro6	-0.656549	7.02002e-08		522	Depp1	0.590879	2.55358e-06						522	Ywhaz	down	ns	N/A	N/A
523	Gm12529	-0.65652	7.03234e-08		523	Pla2g12a	0.59065	2.58222e-06						523	Lsm1	down	ns	N/A	N/A
524	Med8	0.656508	7.03747e-08		524	E430024P14Rik	0.590543	2.59569e-06						524	Apod	up	ns	N/A	N/A
525	Specc1	-0.655923	7.29461e-08		525	Hif1an	0.590233	2.63515e-06						525	Bak1	down	ns	N/A	N/A
526	Slc45a4	-0.65586	7.32265e-08		526	Gmppa	0.590215	2.6375e-06						526	Sun2	up	ns	N/A	N/A
527	Coq10a	-0.655792	7.35324e-08		527	Pnisr	-0.589419	2.74146e-06						527	Nab2	up	ns	N/A	N/A
528	Mtln	-0.655507	7.48297e-08		528	Extl1	0.58908	2.78689e-06						528	Smyd3	down	ns	N/A	N/A
529	Ice1	0.655257	7.598e-08		529	Aard	0.588983	2.79999e-06						529	Cryaa	down	ns	N/A	N/A
530	Hrk	0.654437	7.98813e-08		530	Rap2a	0.588752	2.83156e-06						530	Eif2b4	up	ns	N/A	N/A
531	Rnd2	-0.65421	8.09908e-08		531	Lamp5	0.588726	2.83503e-06						531	Hbegf	down	ns	N/A	N/A
532	Vat1	0.653866	8.27048e-08		532	Gcc1	0.588396	2.88065e-06						532	Pcm1	down	ns	N/A	N/A
533	Glrb	-0.653679	8.36514e-08		533	Gjb6	0.588259	2.89986e-06						533	Zfp703	up	ns	N/A	N/A
534	Gpr153	0.653005	8.71397e-08		534	Ar	0.587819	2.9621e-06						534	Lingo4	up	ns	N/A	N/A
535	Ndufaf2	-0.652719	8.86636e-08		535	Stard13	0.587787	2.96662e-06						535	Tfr2	down	ns	N/A	N/A
536	Hmbox1	-0.652266	9.11314e-08		536	Kcnc1	0.587784	2.96708e-06						536	Dok4	down	ns	N/A	N/A
537	Them4	0.651862	9.3379e-08		537	Rtn4ip1	0.587681	2.98181e-06						537	Tenm1	down	ns	N/A	N/A
538	Cds1	-0.65172	9.41842e-08		538	Gars	0.587616	2.99118e-06						538	Prkg1	down	ns	N/A	N/A
539	Emc2	0.65171	9.42391e-08		539	Ndufaf8	0.587603	2.99305e-06						539	Tpp1	up	ns	N/A	N/A
540	Fam43b	-0.651473	9.55984e-08		540	Aatk	0.586653	3.13309e-06						540	Kif5c	up	ns	N/A	N/A
541	Stc1	0.650548	1.01067e-07		541	Plekhj1	0.586374	3.17541e-06						541	Smad9	up	ns	N/A	N/A
542	Pde2a	0.650406	1.01933e-07		542	Golga7b	0.58627	3.19139e-06						542	Fktn	down	ns	N/A	N/A
543	Ptprr	0.650358	1.02225e-07		543	Gm9034	0.586224	3.19843e-06						543	Dscam	up	ns	N/A	N/A
544	Tcea3	-0.650271	1.02762e-07		544	Golga2	0.585932	3.2435e-06						544	Atp4a	down	ns	N/A	N/A
545	Arhgap36	-0.648869	1.11758e-07		545	Fyttd1	-0.585888	3.2504e-06						545	Spred1	up	ns	N/A	N/A
546	Man2a1	0.648866	1.11778e-07		546	Traf3ip1	-0.585741	3.27327e-06						546	Prokr2	down	ns	N/A	N/A
547	Got2	-0.648089	1.17078e-07		547	Naxe	0.585701	3.27967e-06						547	Camk1	down	ns	N/A	N/A
548	Syndig1	-0.64745	1.21613e-07		548	Polr3h	0.585577	3.29914e-06						548	Nipal2	up	ns	N/A	N/A
549	Kdm2b	0.647269	1.22923e-07		549	Rimkla	0.585222	3.35566e-06						549	Itgav	up	ns	N/A	N/A
550	Gm11451	0.647179	1.23586e-07		550	Msc	0.585181	3.36227e-06						550	Bag5	up	ns	N/A	N/A
551	Bckdhb	-0.645506	1.36441e-07		551	Hnrnpll	-0.584587	3.45901e-06						551	Trim35	down	ns	N/A	N/A
552	Nagk	0.645405	1.37255e-07		552	Otud3	0.584414	3.4878e-06						552	Map6d1	up	ns	N/A	N/A
553	Ppm1e	-0.645207	1.38864e-07		553	Glrx5	0.583201	3.6951e-06						553	Vwc2	up	ns	N/A	N/A
554	Grm5	0.64512	1.39574e-07		554	Rictor	-0.583198	3.69551e-06						554	Chmp2b	down	ns	N/A	N/A
555	2010001A14Rik	-0.644608	1.43846e-07		555	Atp6v0d1	0.583112	3.71073e-06						555	Dnmt1	down	ns	N/A	N/A
556	Rerg	-0.644168	1.47614e-07		556	Acvr1c	-0.583013	3.72829e-06						556	Eif4e	down	ns	N/A	N/A
557	Ptma	0.644066	1.48495e-07		557	Lgr5	0.582964	3.73691e-06						557	Vegfa	up	ns	N/A	N/A
558	Mboat7	0.644032	1.48791e-07		558	Nsf	0.582728	3.77902e-06						558	Fmnl2	down	ns	N/A	N/A
559	Zfp428	0.643991	1.49156e-07		559	Zdhhc7	0.581891	3.93176e-06						559	Drd5	up	ns	N/A	N/A
560	Asph	-0.643886	1.50071e-07		560	Rnf227	-0.581716	3.96457e-06						560	Bend6	up	ns	N/A	N/A
561	Srcin1	0.643064	1.57474e-07		561	Hnrnpk	-0.581602	3.98583e-06						561	Cited1	down	ns	N/A	N/A
562	Slit2	0.642862	1.59342e-07		562	Psmc1	0.580868	4.12647e-06						562	Opa1	up	ns	N/A	N/A
563	Ctnnd2	0.642834	1.59599e-07		563	Wee1	0.580767	4.14614e-06						563	Tmed2	down	ns	N/A	N/A
564	Cdkn1c	0.642356	1.64117e-07		564	Ubqln1	0.580331	4.23223e-06						564	Zmynd8	up	ns	N/A	N/A
565	Tnfaip1	0.641741	1.70095e-07		565	Slc45a1	0.580226	4.25314e-06						565	Rom1	up	ns	N/A	N/A
566	Gm12709	-0.641257	1.74948e-07		566	Copg2	0.580037	4.29103e-06						566	Pcdhga9	down	ns	N/A	N/A
567	Astn1	0.641198	1.75549e-07		567	Kif5a	0.579732	4.35302e-06						567	H3f3a	down	ns	N/A	N/A
568	Ak1	-0.640981	1.77781e-07		568	Gm20699	0.579721	4.35524e-06						568	Lrp8	down	ns	N/A	N/A
569	Creb3l1	0.640708	1.80609e-07		569	Rab11fip5	0.579205	4.46191e-06						569	Zmym3	down	ns	N/A	N/A
570	St8sia2	0.639747	1.90937e-07		570	Cox6a1	0.578944	4.51686e-06						570	Col25a1	down	ns	N/A	N/A
571	Shoc2	0.639652	1.91992e-07		571	Prkcz	0.578334	4.64763e-06						571	Asf1b	down	ns	N/A	N/A
572	Epdr1	-0.639639	1.92138e-07		572	Mrpl32	-0.578152	4.68745e-06						572	Brsk2	up	ns	N/A	N/A
573	Arhgap33	0.639587	1.92713e-07		573	Sema6b	0.577926	4.73728e-06						573	Herc1	down	ns	N/A	N/A
574	Galnt16	-0.639348	1.95389e-07		574	Zfp207	-0.577838	4.75669e-06						574	Postn	down	ns	N/A	N/A
575	Pink1	-0.639088	1.98333e-07		575	Adgrb3	-0.577606	4.80855e-06						575	Prmt6	up	ns	N/A	N/A
576	Cpne5	0.638836	2.01239e-07		576	Sst	0.57666	5.02492e-06						576	Cgrrf1	up	ns	N/A	N/A
577	Gm10684	-0.638786	2.01814e-07		577	Rangap1	0.576505	5.06138e-06						577	Ccn1	down	ns	N/A	N/A
578	Sh3bgrl	0.638772	2.01974e-07		578	Tmem104	0.57641	5.08366e-06						578	Pafah1b1	up	ns	N/A	N/A
579	Cpne2	0.638738	2.0238e-07		579	Itfg1	-0.576293	5.11133e-06						579	Mkln1	down	ns	N/A	N/A
580	Idh3b	-0.638143	2.09418e-07		580	Zdhhc8	0.575983	5.18548e-06						580	Spty2d1	up	ns	N/A	N/A
581	Slc35f1	0.637979	2.11392e-07		581	Mbip	-0.575922	5.20019e-06						581	Pih1d1	down	ns	N/A	N/A
582	Psme2	0.637817	2.13371e-07		582	Dnaja4	0.575039	5.41737e-06						582	Kcns2	down	ns	N/A	N/A
583	D930028M14Rik	0.637396	2.18579e-07		583	Tafa5	0.574825	5.47111e-06						583	Camsap1	down	ns	N/A	N/A
584	Prkaca	-0.637172	2.21397e-07		584	Foxj1	0.574415	5.5758e-06						584	Cacna1b	down	ns	N/A	N/A
585	Rab24	-0.637077	2.22614e-07		585	Sf3b6	-0.573961	5.69366e-06						585	Npy5r	up	ns	N/A	N/A
586	Cnot6	0.636942	2.24332e-07		586	Popdc3	0.573349	5.85648e-06						586	Kars	down	ns	N/A	N/A
587	Dusp15	-0.636806	2.26089e-07		587	Zfp771	0.573025	5.94429e-06						587	Mylk	up	ns	N/A	N/A
588	Nisch	0.636795	2.26223e-07		588	Mink1	0.57298	5.95662e-06						588	Kcnk9	up	ns	N/A	N/A
589	Lhpp	0.636502	2.3004e-07		589	Mrpl33	-0.572807	6.00415e-06						589	Mef2a	up	ns	N/A	N/A
590	Rnf167	-0.636444	2.30802e-07		590	Traf6	0.572433	6.10787e-06						590	Igfbp3	down	ns	N/A	N/A
591	Lig1	0.636102	2.35348e-07		591	Znrf3	-0.572157	6.18586e-06						591	Fam155a	up	ns	N/A	N/A
592	Auh	-0.635869	2.38506e-07		592	Dmtn	0.572137	6.1913e-06						592	Camk2d	down	ns	N/A	N/A
593	Cops9	-0.634527	2.574e-07		593	Rnf157	0.571916	6.25435e-06						593	Slc37a1	down	ns	N/A	N/A
594	Tpi1	-0.63429	2.60871e-07		594	Gnl3	-0.571685	6.32091e-06						594	Zbtb1	up	ns	N/A	N/A
595	Plekha6	-0.634197	2.62245e-07		595	Arl8b	-0.571469	6.38358e-06						595	Carf	up	ns	N/A	N/A
596	Snu13	0.634086	2.63902e-07		596	Mras	0.571373	6.41176e-06						596	Pcx	up	ns	N/A	N/A
597	Gm6960	0.633843	2.67556e-07		597	Ociad1	0.571101	6.49176e-06						597	Il4	down	ns	N/A	N/A
598	Slc25a22	-0.633639	2.70668e-07		598	Nhej1	0.570866	6.56187e-06						598	Unc119	down	ns	N/A	N/A
599	Gm10076	0.633455	2.73493e-07		599	Apeh	0.570672	6.62e-06						599	Gabra3	down	ns	N/A	N/A
600	Isl1	0.633124	2.78642e-07		600	Pdzd8	-0.570504	6.67096e-06						600	Ccna2	down	ns	N/A	N/A
601	Pank3	0.633123	2.7866e-07		601	Slc35b2	0.570452	6.6868e-06						601	Ifrd1	up	ns	N/A	N/A
602	Rplp0	0.632853	2.82941e-07		602	Plekhd1	0.570421	6.6962e-06						602	Phldb2	down	ns	N/A	N/A
603	Pomgnt2	-0.632745	2.84658e-07		603	Osbpl8	-0.570326	6.72537e-06						603	Sri	down	ns	N/A	N/A
604	Flrt3	0.632734	2.8483e-07		604	Gmppb	0.570193	6.76606e-06						604	Arsb	up	ns	N/A	N/A
605	Igf2r	-0.632195	2.93603e-07		605	Zranb2	-0.569887	6.86097e-06						605	Atp6v1d	up	ns	N/A	N/A
606	Slc1a2	-0.632056	2.95912e-07		606	Ykt6	0.569664	6.93082e-06						606	Megf8	up	ns	N/A	N/A
607	Tmed9	-0.631333	3.08164e-07		607	Tssc4	0.569619	6.9451e-06						607	Nap1l2	up	ns	N/A	N/A
608	Sh3glb1	0.630785	3.17769e-07		608	Gpat4	0.569571	6.96023e-06						608	Abi1	down	ns	N/A	N/A
609	Thrsp	-0.630589	3.21262e-07		609	Rora	0.569336	7.03477e-06						609	Brd3	down	ns	N/A	N/A
610	Hcn2	-0.630563	3.21733e-07		610	Tnfsf13b	0.568829	7.19869e-06						610	Osgin2	down	ns	N/A	N/A
611	Card9	-0.630442	3.23919e-07		611	Pnn	-0.568638	7.2611e-06						611	Prmt7	down	ns	N/A	N/A
612	Mtfp1	-0.630382	3.24997e-07		612	Fam234b	0.568193	7.40876e-06						612	Psmg1	down	ns	N/A	N/A
613	Tm7sf3	0.630323	3.26078e-07		613	Atp6ap1	0.567892	7.5104e-06						613	Rtn4	down	ns	N/A	N/A
614	Samd14	0.630011	3.31799e-07		614	Zmat3	0.567802	7.54071e-06						614	Snap29	down	ns	N/A	N/A
615	Pah	-0.629909	3.33696e-07		615	Rnf112	0.567649	7.59308e-06						615	Dapk2	up	ns	N/A	N/A
616	Atat1	0.629225	3.46657e-07		616	Osbp2	0.567335	7.70159e-06						616	Trim32	up	ns	N/A	N/A
617	Tnip1	-0.629044	3.50153e-07		617	Ntpcr	0.56726	7.72758e-06						617	Mafk	up	ns	N/A	N/A
618	Gm5353	-0.628913	3.52719e-07		618	Ccser2	0.567121	7.77615e-06						618	Glmn	down	ns	N/A	N/A
619	Mical2	-0.628745	3.56014e-07		619	Gm20632	0.567096	7.78497e-06						619	Gal3st1	up	ns	N/A	N/A
620	Gm7027	0.628627	3.58354e-07		620	Cit	0.566976	7.82695e-06						620	Mtss1	down	ns	N/A	N/A
621	Hadhb	-0.62855	3.59901e-07		621	Phlda3	0.56682	7.88225e-06						621	Flrt1	down	ns	N/A	N/A
622	Dda1	0.628436	3.62183e-07		622	H2ax	0.566406	8.03029e-06						622	Ubr2	down	ns	N/A	N/A
623	Grpel2	0.628086	3.69282e-07		623	Med25	0.566307	8.06646e-06						623	Cntn1	down	ns	N/A	N/A
624	Ddx3x	-0.627921	3.72669e-07		624	Prkd3	0.566299	8.06906e-06						624	Slc1a7	up	ns	N/A	N/A
625	Lysmd2	-0.627895	3.73193e-07		625	Rnf126	0.566229	8.09474e-06						625	L3mbtl3	down	ns	N/A	N/A
626	Col6a2	0.627547	3.80465e-07		626	Nvl	-0.565705	8.28729e-06						626	Magi2	down	ns	N/A	N/A
627	Gm14586	0.627388	3.83812e-07		627	Slitrk3	0.565559	8.34158e-06						627	Rapgef4	down	ns	N/A	N/A
628	Polr2d	0.627331	3.85023e-07		628	Ptges	0.565525	8.3543e-06						628	Dicer1	down	ns	N/A	N/A
629	Uqcrh-ps2	-0.627231	3.87166e-07		629	Csnk1g1	-0.564931	8.57986e-06						629	Myrf	up	ns	N/A	N/A
630	Reps2	-0.627226	3.87271e-07		630	Mtag2	0.564849	8.61123e-06						630	Adra2a	down	ns	N/A	N/A
631	Fgd5	0.62712	3.89537e-07		631	Tank	-0.56437	8.79769e-06						631	Tmem63a	up	ns	N/A	N/A
632	Dtx4	0.626996	3.9221e-07		632	Exog	0.564316	8.81879e-06						632	Hmga2	down	ns	N/A	N/A
633	Wdr47	0.626664	3.99471e-07		633	Ppwd1	-0.564131	8.89183e-06						633	Ube3a	down	ns	N/A	N/A
634	Sema4g	0.626633	4.00149e-07		634	Hdac11	0.564033	8.93097e-06						634	Rbl2	down	ns	N/A	N/A
635	Zfyve9	-0.62626	4.08457e-07		635	Clip2	0.563992	8.94708e-06						635	Ldlrad4	up	ns	N/A	N/A
636	Gm12854	0.62621	4.0957e-07		636	Slc26a8	0.563803	9.02296e-06						636	Pparg	up	ns	N/A	N/A
637	Gjb1	-0.626136	4.1126e-07		637	Gm4799	0.563768	9.03687e-06						637	Ncbp1	up	ns	N/A	N/A
638	Npas3	0.625243	4.31918e-07		638	Pmm1	0.563736	9.04985e-06						638	Tnfrsf23	up	ns	N/A	N/A
639	Sema4f	0.624821	4.4203e-07		639	Pygo2	0.563605	9.10303e-06						639	Fmnl1	up	ns	N/A	N/A
640	Dll3	0.624765	4.43398e-07		640	Zscan26	-0.563351	9.20653e-06						640	Usp51	down	ns	N/A	N/A
641	D430041D05Rik	-0.623972	4.63049e-07		641	Cnot7	-0.563065	9.32444e-06						641	Nipal3	up	ns	N/A	N/A
642	Pcdh8	0.623857	4.65945e-07		642	Ppp5c	0.562685	9.48331e-06						642	Prdm16	up	ns	N/A	N/A
643	Rev3l	0.623591	4.72764e-07		643	Palld	0.562658	9.4947e-06						643	Efnb3	down	ns	N/A	N/A
644	Ppp1r13b	-0.622297	5.07242e-07		644	Nfix	0.562456	9.58e-06						644	Ep400	down	ns	N/A	N/A
645	Rubcnl	-0.622023	5.14831e-07		645	Taf1b	-0.562438	9.58763e-06						645	Pcsk5	down	ns	N/A	N/A
646	Micos10	-0.621991	5.15747e-07		646	Cdc34	0.561837	9.84685e-06						646	Calhm6	up	ns	N/A	N/A
647	Ergic2	0.62196	5.16614e-07		647	Mtmr2	-0.561531	9.98116e-06						647	Sema5b	down	ns	N/A	N/A
648	Slc35b1	0.621935	5.17314e-07		648	S100a16	0.561524	9.98419e-06						648	Lrrn3	down	ns	N/A	N/A
649	Cdh8	0.621902	5.18234e-07		649	Calb2	0.561177	1.01386e-05						649	Fxn	down	ns	N/A	N/A
650	Hgsnat	-0.621655	5.25207e-07		650	Hspbp1	0.561053	1.01942e-05						650	Ptger3	down	ns	N/A	N/A
651	Grina	-0.620088	5.71607e-07		651	Slc9a9	0.560852	1.02851e-05						651	Slc25a15	up	ns	N/A	N/A
652	Aprt	0.620002	5.74265e-07		652	Catsper2	0.56074	1.03359e-05						652	Kndc1	up	ns	N/A	N/A
653	Kcnab1	-0.619424	5.92405e-07		653	Gm5228	0.560387	1.04982e-05						653	Ptpru	down	ns	N/A	N/A
654	Mog	-0.618914	6.08848e-07		654	Shisa4	0.560277	1.05493e-05						654	Tirap	down	ns	N/A	N/A
655	Tbc1d24	0.618762	6.13806e-07		655	Gm5776	-0.560075	1.06434e-05						655	Stat5a	down	ns	N/A	N/A
656	Gm9385	0.618742	6.14488e-07		656	Rnf38	-0.559967	1.06945e-05						656	Serinc5	up	ns	N/A	N/A
657	Mpp2	0.618167	6.33691e-07		657	Mark4	0.559914	1.07192e-05						657	Klf15	up	ns	N/A	N/A
658	Hacd1	0.617648	6.51529e-07		658	Itpr3	0.559846	1.07515e-05						658	Nck1	up	ns	N/A	N/A
659	Pld3	0.617527	6.55745e-07		659	Wdr89	0.559819	1.07642e-05						659	Slc13a3	up	ns	N/A	N/A
660	Dynlt3	-0.617386	6.60708e-07		660	Tcf25	0.559089	1.11154e-05						660	Rims2	down	ns	N/A	N/A
661	Fitm2	-0.617007	6.74174e-07		661	Svop	0.558825	1.12448e-05						661	Rnf168	up	ns	N/A	N/A
662	Dusp3	0.616812	6.81233e-07		662	Slitrk2	-0.558781	1.12664e-05						662	Igsf9	down	ns	N/A	N/A
663	Ank1	-0.616633	6.87752e-07		663	Esd	0.558658	1.13273e-05						663	Lin7a	up	ns	N/A	N/A
664	Synpr	0.616412	6.95871e-07		664	Glt8d1	-0.55858	1.13662e-05						664	Nom1	up	ns	N/A	N/A
665	Cstad	-0.616336	6.98691e-07		665	Gm8659	0.558465	1.14236e-05						665	Pkd2l2	down	ns	N/A	N/A
666	Cenpt	0.616041	7.09745e-07		666	Fzr1	0.558417	1.14475e-05						666	Nsd2	down	ns	N/A	N/A
667	B230219D22Rik	0.615554	7.28329e-07		667	Ano10	0.557919	1.16999e-05						667	Ntf5	down	ns	N/A	N/A
668	Idh3g	-0.615155	7.43898e-07		668	CK137956	0.557806	1.17578e-05						668	Anks1	up	ns	N/A	N/A
669	Fgl2	0.614922	7.53103e-07		669	Rapgef6	-0.557676	1.18251e-05						669	Sdcbp	up	ns	N/A	N/A
670	Snhg4	0.614569	7.67293e-07		670	Hebp2	0.55765	1.18381e-05						670	Cyba	down	ns	N/A	N/A
671	Nedd4l	0.614564	7.67502e-07		671	Bpnt1	-0.557648	1.18395e-05						671	Rhcg	down	ns	N/A	N/A
672	Agpat4	0.614308	7.7796e-07		672	Arhgef25	0.556987	1.21859e-05						672	Adm	up	ns	N/A	N/A
673	Fn3k	-0.613844	7.97227e-07		673	Pip5k1b	0.556926	1.22184e-05						673	Mkks	up	ns	N/A	N/A
674	Krt222	-0.613561	8.09203e-07		674	Eif4g1	0.556892	1.22363e-05						674	Sparc	up	ns	N/A	N/A
675	Elapor1	0.613455	8.13724e-07		675	Cops6	0.556302	1.2555e-05						675	Fn1	down	ns	N/A	N/A
676	Ebpl	0.613367	8.17507e-07		676	Dapk3	0.556015	1.27128e-05						676	Fez2	up	ns	N/A	N/A
677	Syt9	0.613079	8.29998e-07		677	Fzd10os	0.555933	1.27583e-05						677	Csmd3	down	ns	N/A	N/A
678	Galk1	0.612818	8.41444e-07		678	Chek2	0.555849	1.28047e-05						678	Ptpn22	up	ns	N/A	N/A
679	Racgap1	0.612636	8.49541e-07		679	Tceal1	-0.555598	1.29452e-05						679	Sdha	up	ns	N/A	N/A
680	Elovl5	-0.612321	8.63675e-07		680	Wdr82	-0.555203	1.31686e-05						680	Ermn	up	ns	N/A	N/A
681	Pdhb	-0.612265	8.6623e-07		681	A330041J22Rik	0.554992	1.32897e-05						681	Sall2	up	ns	N/A	N/A
682	Myo9a	0.612077	8.74782e-07		682	Prrt3	0.554916	1.33338e-05						682	Slc4a10	down	ns	N/A	N/A
683	Fa2h	-0.611851	8.85224e-07		683	Aldoart2	0.554713	1.34511e-05						683	Cdk5r1	down	ns	N/A	N/A
684	Pop5	-0.61139	9.06812e-07		684	Ube4b	0.554672	1.34753e-05						684	Fxyd2	down	ns	N/A	N/A
685	Cdr2l	-0.611165	9.17564e-07		685	Zbtb39	0.554663	1.34805e-05						685	Rhoa	down	ns	N/A	N/A
686	Atp11b	0.611065	9.22346e-07		686	Tfcp2	-0.554554	1.3544e-05						686	Bloc1s6	down	ns	N/A	N/A
687	Ndrg4	-0.61084	9.33262e-07		687	Psmc5	0.554522	1.35627e-05						687	Lgi1	down	ns	N/A	N/A
688	Fdx1	-0.610441	9.52845e-07		688	Pdlim2	0.553889	1.39388e-05						688	Smurf1	down	ns	N/A	N/A
689	Nrsn2	0.610352	9.57284e-07		689	Gm15186	-0.553886	1.39408e-05						689	Ssh2	down	ns	N/A	N/A
690	Pbx1	0.610317	9.59027e-07		690	Fam98c	0.553835	1.39717e-05						690	Cfdp1	down	ns	N/A	N/A
691	Syt5	0.609795	9.85433e-07		691	Ube2l3	0.553824	1.39785e-05						691	Klk8	down	ns	N/A	N/A
692	Ccl2	0.609654	9.92656e-07		692	Dock7	-0.553569	1.4133e-05						692	Hdac3	up	ns	N/A	N/A
693	Slc7a14	-0.609631	9.93884e-07		693	P4htm	0.553542	1.41491e-05						693	Mbd2	up	ns	N/A	N/A
694	Atpaf1	-0.609512	1.00003e-06		694	Kdm5c	-0.553323	1.42835e-05						694	Sema4a	down	ns	N/A	N/A
695	Sbk1	0.60928	1.01214e-06		695	Ssbp3	0.55326	1.43225e-05						695	Nalcn	up	ns	N/A	N/A
696	Gm6142	0.609062	1.02365e-06		696	Spock1	0.553202	1.43581e-05						696	Slitrk5	up	ns	N/A	N/A
697	Pex5l	-0.608217	1.0694e-06		697	Tex2	-0.553008	1.44786e-05						697	Pf4	down	ns	N/A	N/A
698	Cthrc1	0.608081	1.07698e-06		698	Smap2	0.552946	1.45174e-05						698	Yeats2	down	ns	N/A	N/A
699	Nr3c1	-0.607711	1.09777e-06		699	Isca2	-0.552933	1.45255e-05						699	Mal	up	ns	N/A	N/A
700	Gm10320	0.60763	1.10231e-06		700	Lrp1	0.552182	1.50021e-05						700	Adgrb1	up	ns	N/A	N/A
701	Zfp605	0.607464	1.11179e-06		701	2310069G16Rik	0.551952	1.5151e-05						701	Cnnm4	down	ns	N/A	N/A
702	Sipa1l1	-0.607358	1.1179e-06		702	Jmjd8	0.551543	1.54187e-05						702	Maf1	down	ns	N/A	N/A
703	Tmem87b	0.607206	1.12672e-06		703	Plekhb1	0.551531	1.54267e-05						703	Ss18l1	down	ns	N/A	N/A
704	Fam117b	0.607176	1.12843e-06		704	Gm11892	0.551503	1.54453e-05						704	Clca1	down	ns	N/A	N/A
705	Gm3294	-0.607129	1.13121e-06		705	Dym	0.551442	1.54855e-05						705	Xpr1	down	ns	N/A	N/A
706	Plce1	-0.60697	1.14046e-06		706	Gp5	0.551423	1.54987e-05						706	Npy4r	down	ns	N/A	N/A
707	Cycs	-0.606117	1.1916e-06		707	Npr2	0.551265	1.56038e-05						707	Kcnh8	down	ns	N/A	N/A
708	Fabp5l2	0.606095	1.19292e-06		708	Sap30l	0.551225	1.56305e-05						708	Cirbp	down	ns	N/A	N/A
709	Mapk8ip2	-0.605585	1.22452e-06		709	Sestd1	-0.551078	1.57292e-05						709	Map6	down	ns	N/A	N/A
710	Kcnt2	0.605341	1.23994e-06		710	Fam78b	0.551007	1.5777e-05						710	Fut9	down	ns	N/A	N/A
711	Tspan4	0.605245	1.24605e-06		711	Crk	-0.55064	1.60266e-05						711	Tbc1d32	down	ns	N/A	N/A
712	Tmem179	-0.605067	1.25747e-06		712	Ppp4r3a	-0.550557	1.60835e-05						712	Braf	down	ns	N/A	N/A
713	Abhd12	-0.604858	1.27099e-06		713	Pask	0.55016	1.63577e-05						713	Nrg3	down	ns	N/A	N/A
714	Mettl9	0.604806	1.27434e-06		714	Hdhd3	0.550145	1.63687e-05						714	Eny2	down	ns	N/A	N/A
715	Gm7846	0.604404	1.30079e-06		715	Neu4	0.549848	1.65771e-05						715	Slc5a6	up	ns	N/A	N/A
716	Stx4a	-0.604212	1.31356e-06		716	Ssr3	-0.549717	1.66701e-05						716	Shc1	up	ns	N/A	N/A
717	Slc8a2	0.604078	1.32256e-06		717	Naga	0.549411	1.68883e-05						717	Cox8b	up	ns	N/A	N/A
718	Sdc3	0.603937	1.33214e-06		718	Hmox1	0.548765	1.73589e-05						718	Golga4	up	ns	N/A	N/A
719	Galc	-0.603903	1.33439e-06		719	Srsf9	0.548328	1.76834e-05						719	Trip6	down	ns	N/A	N/A
720	Borcs6	-0.60352	1.36068e-06		720	Tra2a	-0.548074	1.78747e-05						720	Exosc9	down	ns	N/A	N/A
721	Mapkapk3	-0.603422	1.3675e-06		721	Eif4a1	-0.547863	1.80353e-05						721	Rnf165	down	ns	N/A	N/A
722	Iqsec3	-0.603376	1.37068e-06		722	Zc3h7a	-0.547661	1.81902e-05						722	Numb	down	ns	N/A	N/A
723	Cdc42ep5	0.603114	1.38908e-06		723	Apc2	0.547036	1.86773e-05						723	Trim46	down	ns	N/A	N/A
724	Zfp612	-0.602878	1.4058e-06		724	Mpv17l	-0.546965	1.87333e-05						724	Mfsd10	up	ns	N/A	N/A
725	Fat1	0.602769	1.41364e-06		725	Tmem196	0.546822	1.88472e-05						725	Adcy1	down	ns	N/A	N/A
726	Kif3b	0.602074	1.46432e-06		726	Stx6	0.546482	1.91189e-05						726	Kcnt1	up	ns	N/A	N/A
727	Tmem229b	-0.600911	1.55293e-06		727	Hlf	0.545925	1.95733e-05						727	Derl2	down	ns	N/A	N/A
728	Insig1	-0.600871	1.55607e-06		728	Puf60	0.545661	1.97913e-05						728	Tgfb2	down	ns	N/A	N/A
729	Gm26154	0.600684	1.57075e-06		729	Abca7	0.545389	2.0019e-05						729	Clcn7	up	ns	N/A	N/A
730	Tppp	-0.600476	1.58736e-06		730	Dyrk1b	0.545291	2.01014e-05						730	Ndrg2	down	ns	N/A	N/A
731	Pacsin3	-0.600301	1.60141e-06		731	Tigar	0.544707	2.06005e-05						731	Npas4	up	ns	N/A	N/A
732	Uba1	0.600142	1.6142e-06		732	Nploc4	0.544392	2.08739e-05						732	Prmt5	down	ns	N/A	N/A
733	Banf1	0.60011	1.61685e-06		733	Rabggta	0.544017	2.12038e-05						733	Clic4	up	ns	N/A	N/A
734	Dpy30	0.599996	1.6261e-06		734	Gm16030	-0.543918	2.12918e-05						734	Atp2b3	up	ns	N/A	N/A
735	Pitpna	-0.599856	1.6376e-06		735	Reep1	0.54371	2.14785e-05						735	Rap1gap2	up	ns	N/A	N/A
736	Chp1	-0.599728	1.64818e-06		736	Eif2a	-0.543627	2.15528e-05						736	Trim27	down	ns	N/A	N/A
737	Caly	0.598752	1.73087e-06		737	Uggt1	0.543486	2.16801e-05						737	Adam9	up	ns	N/A	N/A
738	Kmt2a	0.598461	1.75622e-06		738	Zer1	0.543379	2.17774e-05						738	Agrn	down	ns	N/A	N/A
739	Prr36	0.598105	1.78771e-06		739	Ctf2	0.543264	2.18817e-05						739	Atp13a3	down	ns	N/A	N/A
740	Bzw1	0.598052	1.79251e-06		740	Vipr2	0.54319	2.19498e-05						740	Apc	down	ns	N/A	N/A
741	Cd302	0.597945	1.80211e-06		741	Dnlz	0.543072	2.2058e-05						741	Ston2	down	ns	N/A	N/A
742	A330023F24Rik	-0.597575	1.83566e-06		742	Zfp516	0.542351	2.27306e-05						742	Nf1	down	ns	N/A	N/A
743	Clip4	-0.596885	1.8998e-06		743	Mfsd13a	0.541754	2.33011e-05						743	Igfbp4	down	ns	N/A	N/A
744	Cyb5a	0.596555	1.93123e-06		744	Phb	0.541673	2.338e-05						744	Rab11b	down	ns	N/A	N/A
745	Doc2b	0.596497	1.93679e-06		745	Gne	0.541667	2.33857e-05						745	Ror2	down	ns	N/A	N/A
746	Prune2	-0.596456	1.94076e-06		746	Rtn3	0.541541	2.35081e-05						746	Slc22a3	down	ns	N/A	N/A
747	Gm12596	-0.596273	1.95848e-06		747	Pef1	0.541116	2.39265e-05						747	Tro	down	ns	N/A	N/A
748	Kat6b	0.595784	2.00656e-06		748	A330033J07Rik	0.541032	2.40093e-05						748	Kirrel3	down	ns	N/A	N/A
749	Lrrn2	-0.595338	2.05132e-06		749	Hdac1	0.540963	2.40782e-05						749	Clstn1	up	ns	N/A	N/A
750	Tmem125	-0.595111	2.07451e-06		750	Scyl1	0.540333	2.4714e-05						750	Ncdn	up	ns	N/A	N/A
751	Nedd4	0.595032	2.0827e-06		751	Gm9211	0.53996	2.50986e-05						751	Stx1b	up	ns	N/A	N/A
752	Krtdap	0.594986	2.08742e-06		752	Rasa2	-0.539052	2.60552e-05						752	Clasp2	down	ns	N/A	N/A
753	Gpr137	-0.594372	2.15163e-06		753	Ttc14	-0.538714	2.64209e-05						753	Fkbp8	up	ns	N/A	N/A
754	Sirt2	-0.594176	2.17254e-06		754	Rnf7	-0.538621	2.65215e-05						754	Arid1b	down	ns	N/A	N/A
755	Chd3	0.593958	2.19594e-06		755	Azin1	-0.538581	2.65652e-05						755	Atp5d	up	ns	N/A	N/A
756	Nlgn3	0.593892	2.20318e-06		756	Ube2f	0.538111	2.70832e-05						756	Mt3	up	ns	N/A	N/A
757	Gm7694	-0.593529	2.24286e-06		757	Slc4a2	0.537814	2.74148e-05						757	Slc25a1	up	ns	N/A	N/A
758	Aldh1l2	0.593368	2.26068e-06		758	Rnf208	0.53766	2.75888e-05						758	Syt11	up	ns	N/A	N/A
759	Lin7b	-0.593258	2.27292e-06		759	Armcx1	-0.537492	2.77801e-05						759	Kcnk3	up	ns	N/A	N/A
760	Snx6	0.592975	2.30469e-06		760	Tub	-0.537332	2.79626e-05						760	Slc27a4	up	ns	N/A	N/A
761	Gm6421	0.592874	2.31614e-06		761	Stk38	-0.537169	2.8149e-05						761	Arhgdia	up	ns	N/A	N/A
762	Shank2	0.59287	2.31664e-06		762	Insl6	0.536911	2.84485e-05						762	Aars	up	ns	N/A	N/A
763	Adamts16	0.592733	2.33226e-06		763	Fxr2	0.536759	2.86256e-05						763	Uchl1	up	ns	N/A	N/A
764	Dgkk	-0.592607	2.34668e-06		764	Sort1	0.536444	2.89959e-05						764	Gatad1	down	ns	N/A	N/A
765	Tceal6	-0.592263	2.38665e-06		765	Gm4950	0.536269	2.92044e-05						765	Celsr2	up	ns	N/A	N/A
766	Palmd	-0.592083	2.40769e-06		766	Mff	-0.536247	2.92297e-05						766	Lynx1	up	ns	N/A	N/A
767	Trbv29	0.592046	2.41205e-06		767	Sar1a	0.535751	2.98268e-05						767	Cend1	up	ns	N/A	N/A
768	Ifngr1	-0.591896	2.42986e-06		768	A130014A01Rik	0.535652	2.99482e-05						768	Sv2c	up	ns	N/A	N/A
769	Ssna1	0.591631	2.46157e-06		769	Nub1	0.53559	3.00241e-05						769	Grin1	up	ns	N/A	N/A
770	Cinp	0.591579	2.46782e-06		770	Prdm5	0.535565	3.00541e-05						770	Faim2	up	ns	N/A	N/A
771	Cox6b2	0.591188	2.51535e-06		771	Gosr1	-0.535271	3.04156e-05						771	Usp22	down	ns	N/A	N/A
772	Slc9b2	0.591136	2.52173e-06		772	Trpm4	0.535115	3.06101e-05						772	Timp2	up	ns	N/A	N/A
773	Synj1	-0.590685	2.57781e-06		773	Adam8	0.534965	3.07964e-05						773	Tet2	down	ns	N/A	N/A
774	Ppp1r26	0.590526	2.59789e-06		774	Ahsa1	0.53473	3.10925e-05						774	Robo1	down	ns	N/A	N/A
775	Pde1b	-0.59018	2.64196e-06		775	Tmem259	0.534485	3.14032e-05						775	Spin1	down	ns	N/A	N/A
776	Gpr3	-0.589958	2.67063e-06		776	Rplp2	0.534461	3.14334e-05						776	Dpysl2	down	ns	N/A	N/A
777	Ndufb5	-0.589766	2.69567e-06		777	Slc9a3r2	0.534214	3.175e-05						777	Neu1	up	ns	N/A	N/A
778	Abracl	0.589669	2.70833e-06		778	Smc5	-0.534169	3.18083e-05						778	Atp6v0a1	up	ns	N/A	N/A
779	Nexmif	0.589566	2.72201e-06		779	AY036118	0.533954	3.20859e-05						779	Spag9	down	ns	N/A	N/A
780	Sgcb	0.589544	2.72493e-06		780	Chat	0.5338	3.22872e-05						780	Camk2g	up	ns	N/A	N/A
781	Vta1	0.589177	2.77384e-06		781	Rcn2	-0.533682	3.24418e-05						781	Supt6	up	ns	N/A	N/A
782	Rrp1	-0.588928	2.80744e-06		782	Ypel2	0.533658	3.24738e-05						782	Ncs1	up	ns	N/A	N/A
783	Gnaz	0.588838	2.8198e-06		783	Hsp90ab1	0.533655	3.24777e-05						783	Smyd2	up	ns	N/A	N/A
784	Tmx2	-0.588737	2.8335e-06		784	Rnf216	0.53354	3.26289e-05						784	Atp6v0e2	up	ns	N/A	N/A
785	Nyap2	0.588676	2.842e-06		785	Borcs5	0.533093	3.32231e-05						785	Mark2	up	ns	N/A	N/A
786	Ddt	-0.588083	2.92455e-06		786	Gtf3c1	0.533035	3.33018e-05						786	Hmgn3	down	ns	N/A	N/A
787	Ipo11	0.587722	2.9759e-06		787	Samd4b	0.532719	3.37286e-05						787	Nckipsd	up	ns	N/A	N/A
788	Mcm6	0.587477	3.01134e-06		788	Nup50	0.532685	3.37749e-05						788	Tomm40	up	ns	N/A	N/A
789	Saraf	0.587196	3.0523e-06		789	Vars	0.532227	3.44045e-05						789	Clstn3	up	ns	N/A	N/A
790	Dnmt3a	-0.587086	3.06863e-06		790	Gm26981	0.532015	3.47001e-05						790	Camk2b	up	ns	N/A	N/A
791	Hmgb1	0.586981	3.08418e-06		791	Gm25076	0.531203	3.58511e-05						791	Tpgs1	up	ns	N/A	N/A
792	Coa8	0.586958	3.08754e-06		792	Tnfrsf13c	0.531013	3.61265e-05						792	Pbrm1	down	ns	N/A	N/A
793	Ccdc126	-0.586677	3.12952e-06		793	Slc4a1ap	-0.530997	3.61496e-05						793	Iqsec2	up	ns	N/A	N/A
794	Eef1a1	0.586564	3.14656e-06		794	Ccdc124	0.530893	3.63007e-05						794	Tmem38a	up	ns	N/A	N/A
795	Kcna6	0.586054	3.22454e-06		795	Klhl7	-0.530745	3.65169e-05						795	Dnm1	up	ns	N/A	N/A
796	Epb41l4a	0.585929	3.24401e-06		796	Slc48a1	0.530469	3.69233e-05						796	Adam15	up	ns	N/A	N/A
797	Capn5	0.585898	3.24883e-06		797	App	0.530232	3.72748e-05						797	Skil	down	ns	N/A	N/A
798	Zfp512	0.585828	3.25971e-06		798	Adgrl1	0.529991	3.76371e-05						798	Cntnap1	up	ns	N/A	N/A
799	Atg13	-0.585533	3.30616e-06		799	Rundc3b	-0.529649	3.81549e-05						799	Pnkd	up	ns	N/A	N/A
800	Cnih1	0.585175	3.36318e-06		800	Gm13092	-0.52946	3.84442e-05						800	Slc22a17	up	ns	N/A	N/A
801	Pcsk4	0.58515	3.36726e-06		801	Por	0.529227	3.88032e-05						801	Cx3cl1	up	ns	N/A	N/A
802	9130230N09Rik	-0.584757	3.4311e-06		802	Gm4217	0.528933	3.92611e-05						802	Tmem126a	down	ns	N/A	N/A
803	Mapk6	0.584174	3.52778e-06		803	Cd82	0.528612	3.9766e-05						803	Mapk8ip3	up	ns	N/A	N/A
804	Gpd2	0.583751	3.59964e-06		804	Pcdh1	0.528543	3.98762e-05						804	Rab3a	up	ns	N/A	N/A
805	Wbp2	-0.583506	3.64189e-06		805	9130023H24Rik	0.528118	4.05552e-05						805	Nucks1	down	ns	N/A	N/A
806	Gnao1	0.58284	3.75894e-06		806	Zbtb3	0.527593	4.14102e-05						806	Stxbp1	up	ns	N/A	N/A
807	Mapk15	0.582262	3.86343e-06		807	Tbc1d13	0.527422	4.16921e-05						807	Nck2	down	ns	N/A	N/A
808	Usp45	-0.582074	3.89784e-06		808	Sdr42e1	0.527289	4.1914e-05						808	Grid2ip	up	ns	N/A	N/A
809	Bag6	-0.581539	3.99775e-06		809	Slc40a1	0.526716	4.28765e-05						809	Cacng2	up	ns	N/A	N/A
810	Rabgap1l	0.581462	4.01229e-06		810	Tmem150c	0.526689	4.29219e-05						810	Bad	up	ns	N/A	N/A
811	Cdk2ap1	-0.581141	4.07356e-06		811	Lman2	0.526395	4.34246e-05						811	Hdac2	down	ns	N/A	N/A
812	Cd164	-0.581054	4.09036e-06		812	Rdh5	0.526297	4.35926e-05						812	Men1	up	ns	N/A	N/A
813	Nkain4	0.580564	4.18589e-06		813	Abhd8	0.526058	4.40068e-05						813	Pctp	up	ns	N/A	N/A
814	Lclat1	0.580166	4.26513e-06		814	Sh3bgrl2	0.525366	4.52259e-05						814	Slc8a3	up	ns	N/A	N/A
815	Scrt1	-0.579885	4.32181e-06		815	Gm14567	-0.524761	4.63165e-05						815	Stk24	up	ns	N/A	N/A
816	Arl4c	-0.579141	4.47552e-06		816	Alas1	0.524754	4.63294e-05						816	Chac1	up	ns	N/A	N/A
817	Gabra4	0.578702	4.56837e-06		817	Ung	0.524569	4.66677e-05						817	Adam10	down	ns	N/A	N/A
818	Cercam	0.578611	4.58796e-06		818	Tvp23b	-0.524378	4.70187e-05						818	P2rx6	up	ns	N/A	N/A
819	Fam102a	-0.578473	4.61766e-06		819	Senp2	0.524339	4.70913e-05						819	Atp2b2	up	ns	N/A	N/A
820	Leprot	0.578314	4.65215e-06		820	Cdh18	0.524137	4.74657e-05						820	Chd1	down	ns	N/A	N/A
821	Gm16580	0.578036	4.7129e-06		821	Tmco1	-0.523974	4.77707e-05						821	Fgfr1	up	ns	N/A	N/A
822	Rac3	0.577788	4.76777e-06		822	Dlgap3	0.523481	4.87045e-05						822	Arhgap44	down	ns	N/A	N/A
823	Baiap2	0.577698	4.78786e-06		823	Crlf1	0.523328	4.89963e-05						823	Trim37	up	ns	N/A	N/A
824	Marchf1	0.57682	4.98783e-06		824	Tecta	0.523169	4.93032e-05						824	Gpx4	up	ns	N/A	N/A
825	Gm8216	0.576722	5.01061e-06		825	Acap3	0.523143	4.93537e-05						825	Slc4a3	up	ns	N/A	N/A
826	Lrrc40	0.57657	5.04607e-06		826	Gys1	0.523045	4.95421e-05						826	Igsf9b	up	ns	N/A	N/A
827	Ophn1	0.576205	5.13242e-06		827	Sgms1	-0.522104	5.1398e-05						827	Six4	up	ns	N/A	N/A
828	Myh7b	-0.575728	5.24729e-06		828	Ccl25	0.522104	5.13993e-05						828	Rrn3	down	ns	N/A	N/A
829	Eml1	0.575717	5.24989e-06		829	Coro1b	0.522037	5.15332e-05						829	Rfx3	down	ns	N/A	N/A
830	Spag1	-0.575664	5.26275e-06		830	Tmem256	0.521817	5.19773e-05						830	Atp1a3	up	ns	N/A	N/A
831	D17H6S53E	-0.575313	5.34905e-06		831	Chm	-0.521807	5.19983e-05						831	Fbxo31	up	ns	N/A	N/A
832	Prpf38a	0.574939	5.44231e-06		832	Ak8	0.521102	5.34459e-05						832	Tspyl1	down	ns	N/A	N/A
833	Flrt2	0.574643	5.51732e-06		833	Frem3	0.520768	5.41437e-05						833	Igsf8	up	ns	N/A	N/A
834	Orc6	0.574586	5.53177e-06		834	Nol10	0.520713	5.42603e-05						834	Map4	down	ns	N/A	N/A
835	Gm7784	-0.574575	5.53481e-06		835	Atg4c	-0.520709	5.4268e-05						835	Fgfr2	up	ns	N/A	N/A
836	Pak7	0.574462	5.56353e-06		836	Zswim6	0.520663	5.4365e-05						836	Gpm6a	down	ns	N/A	N/A
837	Cebpb	-0.574154	5.64328e-06		837	6330562C20Rik	0.519701	5.64321e-05						837	Rxra	up	ns	N/A	N/A
838	Kcnq3	0.573702	5.76202e-06		838	Srsf10	-0.519029	5.79177e-05						838	Nrxn2	up	ns	N/A	N/A
839	Cnp	-0.57368	5.76794e-06		839	Cd99l2	0.518934	5.81313e-05						839	Sec14l1	up	ns	N/A	N/A
840	Wasl	-0.573613	5.78559e-06		840	Pla2g3	0.518934	5.81313e-05						840	Rogdi	up	ns	N/A	N/A
841	Pfkp	0.573378	5.84871e-06		841	Akr1a1	0.518301	5.95689e-05						841	Tmem63b	up	ns	N/A	N/A
842	Hccs	-0.573351	5.8558e-06		842	Ccdc9	0.518282	5.9612e-05						842	Kcnj14	up	ns	N/A	N/A
843	Flt3	-0.572983	5.95568e-06		843	Peli3	0.518271	5.96392e-05						843	Slc9a8	up	ns	N/A	N/A
844	Pycrl	0.572871	5.98658e-06		844	Gm15270	0.518004	6.02555e-05						844	Actn4	up	ns	N/A	N/A
845	Sh3bp1	-0.571227	6.45464e-06		845	Trpm2	0.517248	6.20335e-05						845	Cyc1	up	ns	N/A	N/A
846	Gadd45a	-0.570939	6.53995e-06		846	Ogfod1	0.516759	6.32106e-05						846	Pak1	up	ns	N/A	N/A
847	Fzd10	-0.570917	6.54653e-06		847	Tmem132e	0.516634	6.35139e-05						847	Banp	up	ns	N/A	N/A
848	Ermp1	-0.570869	6.56077e-06		848	Rab18	-0.516604	6.3587e-05						848	Dync1i2	down	ns	N/A	N/A
849	Adk	-0.570715	6.60712e-06		849	Abca5	-0.516555	6.37077e-05						849	Pole4	down	ns	N/A	N/A
850	Kctd3	0.570652	6.62625e-06		850	Spast	-0.516492	6.38601e-05						850	Slc25a10	up	ns	N/A	N/A
851	Rab37	-0.570637	6.63061e-06		851	Kif1a	0.516346	6.42199e-05						851	Akt1	up	ns	N/A	N/A
852	Gm27031	-0.570262	6.74481e-06		852	Zfyve1	0.516202	6.45744e-05						852	Slc7a1	up	ns	N/A	N/A
853	Gtf2a1	0.570187	6.76799e-06		853	Gm2449	0.516199	6.45807e-05						853	Clcn5	up	ns	N/A	N/A
854	Dstn	0.569926	6.84881e-06		854	Trap1	0.516038	6.49805e-05						854	Brd8	down	ns	N/A	N/A
855	Caml	0.569611	6.94761e-06		855	Vapb	0.515718	6.57822e-05						855	Kmt5a	up	ns	N/A	N/A
856	Tcerg1l	0.569016	7.13775e-06		856	Klhl11	0.515654	6.59432e-05						856	Slc19a1	up	ns	N/A	N/A
857	Anks1b	0.568875	7.18353e-06		857	Gm26721	0.51545	6.64585e-05						857	Atp6v1e1	up	ns	N/A	N/A
858	Nt5c3	0.568527	7.29775e-06		858	Bclaf3	-0.515325	6.67777e-05						858	Cptp	up	ns	N/A	N/A
859	Mobp	-0.568451	7.32273e-06		859	Fam181b	0.515278	6.68969e-05						859	Tnfrsf21	up	ns	N/A	N/A
860	Fxyd1	-0.568203	7.40547e-06		860	Acsl5	0.515228	6.70271e-05						860	Ltk	up	ns	N/A	N/A
861	Ddx25	0.567731	7.56513e-06		861	Spns1	0.514989	6.76403e-05						861	Pip5k1c	up	ns	N/A	N/A
862	Kcnj3	-0.567676	7.58396e-06		862	Hsf4	0.51446	6.90184e-05						862	Kcnj12	up	ns	N/A	N/A
863	Dhrs13	0.567625	7.60136e-06		863	Elfn2	0.514351	6.93062e-05						863	Nlgn2	up	ns	N/A	N/A
864	Tuba8	-0.567515	7.63914e-06		864	Capzb	0.514315	6.94003e-05						864	Myt1l	down	ns	N/A	N/A
865	Stat4	0.567442	7.66434e-06		865	Ctbp1	0.5143	6.94419e-05						865	Ipo4	up	ns	N/A	N/A
866	Slc7a8	-0.56732	7.70654e-06		866	Krt9	0.514186	6.97418e-05						866	E2f1	up	ns	N/A	N/A
867	Adam7	0.567294	7.71588e-06		867	Slc8b1	0.514028	7.0162e-05						867	Macir	down	ns	N/A	N/A
868	Slc25a25	-0.566728	7.91497e-06		868	Sema3e	-0.513856	7.06229e-05						868	Dner	down	ns	N/A	N/A
869	Cacna2d3	-0.566701	7.92461e-06		869	Tars	0.513827	7.07011e-05						869	Pla2g12a	up	ns	N/A	N/A
870	Slc9a1	-0.566585	7.96607e-06		870	Septin2	-0.513689	7.10749e-05						870	Rap2a	up	ns	N/A	N/A
871	Fbxw9	0.566585	7.96624e-06		871	Impdh2-ps	0.513546	7.14598e-05						871	Ar	up	ns	N/A	N/A
872	Fem1b	0.566552	7.97809e-06		872	Pthlh	-0.512856	7.33565e-05						872	Stard13	up	ns	N/A	N/A
873	Zfp532	0.566203	8.10398e-06		873	Ampd2	0.512731	7.37059e-05						873	Kcnc1	up	ns	N/A	N/A
874	Grik3	0.565997	8.17926e-06		874	Ankfy1	-0.512551	7.42098e-05						874	Rtn4ip1	up	ns	N/A	N/A
875	Nr3c2	-0.565628	8.31585e-06		875	Hfe	0.512518	7.43015e-05						875	Aatk	up	ns	N/A	N/A
876	Cpt1a	-0.565345	8.42209e-06		876	Dock2	0.512503	7.43457e-05						876	Golga2	up	ns	N/A	N/A
877	Lgals3	0.565313	8.43412e-06		877	Hid1	0.512436	7.4535e-05						877	Traf3ip1	down	ns	N/A	N/A
878	Nktr	0.565235	8.46362e-06		878	Ndufv1	0.512309	7.48933e-05						878	Atp6v0d1	up	ns	N/A	N/A
879	Nrp2	0.565091	8.51844e-06		879	2310033P09Rik	0.51205	7.56318e-05						879	Acvr1c	down	ns	N/A	N/A
880	Ublcp1	-0.565079	8.52302e-06		880	Snx29	0.512024	7.57054e-05						880	Nsf	up	ns	N/A	N/A
881	Ankrd50	-0.565019	8.54605e-06		881	Pcyt2	0.511577	7.69947e-05						881	Hnrnpk	down	ns	N/A	N/A
882	Mapre2	0.564582	8.71456e-06		882	Gm15892	-0.511315	7.77601e-05						882	Wee1	up	ns	N/A	N/A
883	Psmb6	0.564566	8.72103e-06		883	Uba6	-0.510871	7.90734e-05						883	Prkcz	up	ns	N/A	N/A
884	Cgn	0.564474	8.75661e-06		884	Rnft2	0.510835	7.91803e-05						884	Adgrb3	down	ns	N/A	N/A
885	Arl2bp	-0.564423	8.77676e-06		885	Trip10	0.510762	7.93976e-05						885	Sst	up	ns	N/A	N/A
886	Mag	-0.564354	8.80369e-06		886	Gpld1	0.510726	7.95061e-05						886	Mbip	down	ns	N/A	N/A
887	Pdcl3	0.563489	9.15021e-06		887	Hjurp	0.510634	7.97808e-05						887	Foxj1	up	ns	N/A	N/A
888	Msrb1	-0.563413	9.18115e-06		888	Nnt	-0.510436	8.03769e-05						888	Mink1	up	ns	N/A	N/A
889	Golm2	0.563336	9.21261e-06		889	Gm10649	0.510406	8.04696e-05						889	Dmtn	up	ns	N/A	N/A
890	Ormdl1	0.56326	9.24394e-06		890	Pxmp2	0.510242	8.09682e-05						890	Pdzd8	down	ns	N/A	N/A
891	St3gal5	-0.562572	9.53073e-06		891	Itga3	0.510136	8.12895e-05						891	Slc35b2	up	ns	N/A	N/A
892	Entpd5	-0.562462	9.57742e-06		892	Gm11836	0.510005	8.16911e-05						892	Rora	up	ns	N/A	N/A
893	Rps19	0.562335	9.63182e-06		893	Fcer1g	0.509692	8.26561e-05						893	Atp6ap1	up	ns	N/A	N/A
894	Bhlhb9	0.562311	9.64194e-06		894	Irs2	0.509256	8.40215e-05						894	Zmat3	up	ns	N/A	N/A
895	Ube2n	0.562203	9.68827e-06		895	Poln	0.509226	8.4114e-05						895	Rnf112	up	ns	N/A	N/A
896	Dnajc2	0.562165	9.70477e-06		896	Mrto4	0.509112	8.44753e-05						896	Osbp2	up	ns	N/A	N/A
897	Tomm7	-0.562057	9.75125e-06		897	Ovgp1	0.509099	8.45171e-05						897	Cit	up	ns	N/A	N/A
898	Gstm5	0.56157	9.96372e-06		898	Atrip	0.508808	8.5444e-05						898	H2ax	up	ns	N/A	N/A
899	Snn	-0.560822	1.02987e-05		899	Tnnc1	0.508493	8.64565e-05						899	Slitrk3	up	ns	N/A	N/A
900	Leprotl1	-0.560785	1.03156e-05		900	Amz1	0.508393	8.67791e-05						900	Csnk1g1	down	ns	N/A	N/A
901	Lpar2	0.560639	1.03824e-05		901	Dpp9	0.508141	8.76001e-05						901	Hdac11	up	ns	N/A	N/A
902	Herc3	-0.560617	1.03924e-05		902	Ano5	-0.508109	8.77043e-05						902	Slc26a8	up	ns	N/A	N/A
903	Selenov	0.560427	1.04797e-05		903	Gm6946	0.507954	8.8214e-05						903	Pygo2	up	ns	N/A	N/A
904	Ralgapa1	0.560335	1.05225e-05		904	Tha1	0.507927	8.83029e-05						904	Ppp5c	up	ns	N/A	N/A
905	Klk6	-0.560319	1.05298e-05		905	Trpc5	0.507876	8.84739e-05						905	Palld	up	ns	N/A	N/A
906	Tcaf1	0.560298	1.05395e-05		906	Tpst2	0.507764	8.88413e-05						906	Nfix	up	ns	N/A	N/A
907	Ina	0.560281	1.05473e-05		907	Ddx56	0.507695	8.90709e-05						907	Slc9a9	up	ns	N/A	N/A
908	Plk3	0.560223	1.05745e-05		908	Rabl6	0.507319	9.03284e-05						908	Catsper2	up	ns	N/A	N/A
909	Cacna1g	-0.560184	1.05928e-05		909	Edf1	0.506816	9.20377e-05						909	Mark4	up	ns	N/A	N/A
910	Mmd	0.560121	1.06221e-05		910	Cep104	0.506794	9.21125e-05						910	Itpr3	up	ns	N/A	N/A
911	Ctsf	-0.559992	1.06827e-05		911	Arhgap27	0.506449	9.33032e-05						911	Ano10	up	ns	N/A	N/A
912	Dram2	0.559676	1.08322e-05		912	Ktn1	-0.506038	9.47383e-05						912	Dapk3	up	ns	N/A	N/A
913	Ttc3	0.559399	1.09649e-05		913	Rab7	0.506016	9.48143e-05						913	Wdr82	down	ns	N/A	N/A
914	Taf9	0.559286	1.10196e-05		914	Zfyve27	0.505825	9.54875e-05						914	Ube4b	up	ns	N/A	N/A
915	Sfpq	0.559053	1.1133e-05		915	Dtwd2	-0.5058	9.55774e-05						915	Kdm5c	down	ns	N/A	N/A
916	Zfp365	-0.558916	1.11999e-05		916	Eif3c	0.505759	9.57244e-05						916	Ssbp3	up	ns	N/A	N/A
917	Tubb2a	0.558915	1.12004e-05		917	Septin7	-0.505701	9.5929e-05						917	Spock1	up	ns	N/A	N/A
918	Epb41l5	0.558802	1.12559e-05		918	Pds5a	0.50559	9.63245e-05						918	Lrp1	up	ns	N/A	N/A
919	Klf11	0.558646	1.13334e-05		919	Plxna4	0.505499	9.66493e-05						919	Gp5	up	ns	N/A	N/A
920	Robo2	0.558429	1.14416e-05		920	Eef1akmt2	-0.505351	9.71828e-05						920	Npr2	up	ns	N/A	N/A
921	Rasgrp2	0.558372	1.14703e-05		921	Shh	0.505181	9.77966e-05						921	Crk	down	ns	N/A	N/A
922	Gm8773	0.558011	1.16529e-05		922	Kif18a	0.505109	9.80565e-05						922	Ssr3	down	ns	N/A	N/A
923	Atrx	0.557993	1.16623e-05		923	Sipa1l3	0.50496	9.85997e-05						923	Apc2	up	ns	N/A	N/A
924	Plp2	0.557916	1.17013e-05		924	Ninj1	0.504831	9.9071e-05						924	Abca7	up	ns	N/A	N/A
925	Ankrd40	-0.55773	1.17968e-05		925	Mansc1	0.504773	9.92829e-05						925	Phb	up	ns	N/A	N/A
926	Mad2l2	0.557708	1.18083e-05		926	Nup85	0.504567	0.00010004						926	Hdac1	up	ns	N/A	N/A
927	Gm8730	0.557665	1.18306e-05		927	Efna1	0.504382	0.000100727						927	Rnf7	down	ns	N/A	N/A
928	Cope	-0.55758	1.18744e-05		928	Trim24	-0.504274	0.00010113						928	Prdm5	up	ns	N/A	N/A
929	Slc35f5	0.557496	1.19183e-05		929	Zfp952	-0.504017	0.000102093						929	Trpm4	up	ns	N/A	N/A
930	Elavl2	0.557347	1.19958e-05		930	Cuedc2	0.503888	0.000102578						930	Adam8	up	ns	N/A	N/A
931	Plxna3	0.556869	1.22489e-05		931	Pold1	0.503875	0.000102628						931	Chat	up	ns	N/A	N/A
932	Prr13	-0.556761	1.23066e-05		932	Wdfy1	-0.503461	0.000104208						932	Samd4b	up	ns	N/A	N/A
933	Nampt	0.556225	1.25969e-05		933	Gjc3	0.503209	0.000105178						933	Nup50	up	ns	N/A	N/A
934	Mroh1	-0.555882	1.27865e-05		934	Snrpb	0.502663	0.000107311						934	App	up	ns	N/A	N/A
935	Antkmt	-0.555538	1.29788e-05		935	Palm3	0.502394	0.000108374						935	Tmco1	down	ns	N/A	N/A
936	Mapkapk2	-0.555434	1.30373e-05		936	Foxn2	-0.502245	0.000108968						936	Ccl25	up	ns	N/A	N/A
937	Ica1l	0.555328	1.30977e-05		937	Anapc16	0.501919	0.000110279						937	Coro1b	up	ns	N/A	N/A
938	Armc10	0.55527	1.31307e-05		938	Snx17	0.501713	0.000111116						938	Zswim6	up	ns	N/A	N/A
939	Cdkn1a	0.555202	1.31692e-05		939	D930019O06Rik	0.501525	0.000111882						939	Spast	down	ns	N/A	N/A
940	Nasp	0.555148	1.32004e-05		940	Phb2	0.501516	0.00011192						940	Kif1a	up	ns	N/A	N/A
941	Elp1	0.555089	1.32338e-05		941	Lrrc73	0.501429	0.000112278						941	Vapb	up	ns	N/A	N/A
942	Ddi2	-0.555003	1.32835e-05		942	Capza2	-0.501251	0.000113011						942	Acsl5	up	ns	N/A	N/A
943	Bsn	0.554568	1.35361e-05		943	Mcoln1	0.500637	0.000115575						943	Hsf4	up	ns	N/A	N/A
944	Gm8113	0.554232	1.37339e-05		944	Khdrbs3	-0.50021	0.000117386						944	Capzb	up	ns	N/A	N/A
945	Septin6	0.553874	1.3948e-05		945	Krit1	-0.500131	0.000117727						945	Ctbp1	up	ns	N/A	N/A
946	Gusb	0.553762	1.40156e-05		946	Jup	0.499586	0.000120083						946	Sema3e	down	ns	N/A	N/A
947	Gm11507	0.553697	1.4055e-05		947	Eif3g	0.499447	0.000120694						947	Septin2	down	ns	N/A	N/A
948	B3gnt7	0.553538	1.41517e-05		948	Smarcc2	0.499238	0.000121615						948	Hfe	up	ns	N/A	N/A
949	Nit2	0.553145	1.43933e-05		949	Nr2c2ap	0.49913	0.000122093						949	Uba6	down	ns	N/A	N/A
950	Tmem86a	-0.552981	1.44955e-05		950	Gpn2	0.498484	0.00012499						950	Trip10	up	ns	N/A	N/A
951	Ano4	-0.552955	1.45119e-05		951	Nsmce2	-0.498354	0.00012558						951	Gpld1	up	ns	N/A	N/A
952	Scaper	0.552498	1.48001e-05		952	Cenpq	0.497974	0.000127322						952	Hjurp	up	ns	N/A	N/A
953	Ccdc112	0.551969	1.51396e-05		953	Borcs8	0.497246	0.000130718						953	Itga3	up	ns	N/A	N/A
954	Dcdc2a	0.551627	1.53632e-05		954	Trim3	0.497172	0.000131067						954	Fcer1g	up	ns	N/A	N/A
955	Cpeb4	0.550847	1.58854e-05		955	Tnpo1	-0.497021	0.000131784						955	Ano5	down	ns	N/A	N/A
956	Snhg6	0.550487	1.61312e-05		956	Susd4	0.496989	0.000131935						956	Trpc5	up	ns	N/A	N/A
957	Esyt3	0.550078	1.64156e-05		957	Vars2	0.49678	0.000132932						957	Ddx56	up	ns	N/A	N/A
958	E2f6	-0.549877	1.65565e-05		958	Atad1	-0.496758	0.000133037						958	Zfyve27	up	ns	N/A	N/A
959	Socs1	0.549669	1.67043e-05		959	Paics	-0.496712	0.000133258						959	Septin7	down	ns	N/A	N/A
960	Gm6977	-0.549233	1.70165e-05		960	Abcf3	0.496675	0.000133437						960	Plxna4	up	ns	N/A	N/A
961	Arhgap9	-0.549185	1.70515e-05		961	Cert1	-0.496216	0.000135663						961	Shh	up	ns	N/A	N/A
962	Srpk3	-0.54872	1.73921e-05		962	1810013L24Rik	-0.495962	0.000136909						962	Efna1	up	ns	N/A	N/A
963	Kcnj9	-0.548707	1.74018e-05		963	Gm7741	0.495933	0.000137052						963	Gjc3	up	ns	N/A	N/A
964	Fcor	0.548422	1.76132e-05		964	Gm25911	0.495671	0.000138351						964	Mcoln1	up	ns	N/A	N/A
965	Ppa2	-0.547835	1.8057e-05		965	Map3k4	0.495629	0.000138559						965	Krit1	down	ns	N/A	N/A
966	Celf2	0.547833	1.80581e-05		966	Cfap100	0.495534	0.000139033						966	Smarcc2	up	ns	N/A	N/A
967	Ncald	0.547649	1.81997e-05		967	Cdk5	0.495339	0.000140011						967	Atad1	down	ns	N/A	N/A
968	Rps6ka6	0.547602	1.82358e-05		968	Fam214b	0.495306	0.000140174						968	Cdk5	up	ns	N/A	N/A
969	Ckmt1	-0.54755	1.82758e-05		969	Aspa	0.495233	0.000140543						969	Aspa	up	ns	N/A	N/A
970	Nceh1	-0.547319	1.84554e-05		970	Zfp651	0.49512	0.000141113						970	Hmgn1	down	ns	N/A	N/A
971	Vps50	0.547246	1.85126e-05		971	Chil1	0.494906	0.0001422						971	Sbf1	up	ns	N/A	N/A
972	Rnf2	0.547129	1.86042e-05		972	Atf6b	0.494792	0.000142784						972	Ephb3	up	ns	N/A	N/A
973	Tef	-0.546983	1.87195e-05		973	Hdhd5	0.494434	0.000144627						973	Adgrb2	up	ns	N/A	N/A
974	Efna2	0.546809	1.88569e-05		974	Knop1	0.494419	0.000144705						974	Tgfbr2	up	ns	N/A	N/A
975	Phf24	-0.546458	1.91384e-05		975	Lum	0.494366	0.00014498						975	Rpgr	down	ns	N/A	N/A
976	Mir124a-1hg	-0.54637	1.92095e-05		976	Zfp706	-0.494349	0.000145069						976	Arhgef39	up	ns	N/A	N/A
977	Sac3d1	-0.546362	1.92164e-05		977	Tbl2	0.494112	0.000146305						977	Olig1	up	ns	N/A	N/A
978	Arc	-0.546219	1.9332e-05		978	Thap11	0.493941	0.000147201						978	Rarg	up	ns	N/A	N/A
979	Gm8202	0.54606	1.94624e-05		979	Aldh7a1	0.493784	0.000148029						979	Ireb2	down	ns	N/A	N/A
980	Msmo1	-0.545963	1.95421e-05		980	Fam135b	0.493718	0.000148381						980	Epc1	down	ns	N/A	N/A
981	Sec11a	0.545946	1.95554e-05		981	Gpr83	0.493604	0.000148981						981	Babam1	up	ns	N/A	N/A
982	Hs2st1	0.545555	1.98796e-05		982	Tecpr1	0.493599	0.000149011						982	Tnik	down	ns	N/A	N/A
983	0610010F05Rik	0.545533	1.98987e-05		983	Dhrs7	0.493584	0.00014909						983	Zmym4	down	ns	N/A	N/A
984	Dbndd2	-0.545473	1.99486e-05		984	Ell2	0.493482	0.000149636						984	Mib1	down	ns	N/A	N/A
985	Ulk2	0.54514	2.02296e-05		985	Aff4	-0.493427	0.00014993						985	Ambra1	up	ns	N/A	N/A
986	Isca1	-0.544913	2.04233e-05		986	Hmgn1	-0.49341	0.000150019						986	Kcna2	up	ns	N/A	N/A
987	Trim62	0.544774	2.05425e-05		987	Sbf1	0.493382	0.000150169						987	Efhd1	up	ns	N/A	N/A
988	Slc2a13	0.543547	2.16249e-05		988	Rps6kb2	0.493118	0.000151593						988	Rxrb	up	ns	N/A	N/A
989	Zbtb4	-0.543537	2.16338e-05		989	Adra1d	0.492908	0.000152728						989	Kdm8	up	ns	N/A	N/A
990	Gm12174	0.543404	2.17547e-05		990	Ephb3	0.492687	0.000153935						990	Igfbp7	up	ns	N/A	N/A
991	Rras2	0.543237	2.19069e-05		991	Rbm12	-0.492659	0.000154092						991	Smdt1	up	ns	N/A	N/A
992	Kctd13	0.543069	2.20605e-05		992	Ppt2	0.492641	0.000154192						992	Hcn4	up	ns	N/A	N/A
993	Tns2	-0.542662	2.24382e-05		993	Gm4895	0.492565	0.000154607						993	Jade3	down	ns	N/A	N/A
994	Camkv	0.542493	2.25962e-05		994	Adgrb2	0.492507	0.000154926						994	Brd2	up	ns	N/A	N/A
995	Stum	0.542368	2.27139e-05		995	Ttk	0.492374	0.000155659						995	Th	down	ns	N/A	N/A
996	Fgf12	-0.541449	2.35983e-05		996	Yipf3	0.492292	0.000156115						996	Ucn	up	ns	N/A	N/A
997	Nars	-0.541418	2.36283e-05		997	Ptov1	0.492212	0.00015656						997	Kmt2e	down	ns	N/A	N/A
998	Nbdy	0.540983	2.40586e-05		998	Tgfbr2	0.492196	0.000156653						998	Flot1	up	ns	N/A	N/A
999	Omg	-0.540758	2.42839e-05		999	Rpgr	-0.492136	0.000156983						999	Tdrd3	down	ns	N/A	N/A
1000	Etl4	-0.540747	2.42952e-05		1000	Cenpm	0.491979	0.000157862						1000	Atad2	up	ns	N/A	N/A
1001	Sae1	0.540321	2.47272e-05		1001	Gm15496	0.491957	0.000157987						1001	Apba2	up	ns	N/A	N/A
1002	Rpl7	0.54012	2.49334e-05		1002	Reep4	0.491922	0.000158182						1002	Atp1a2	up	ns	N/A	N/A
1003	Spsb4	0.539926	2.51337e-05		1003	Arhgef39	0.49175	0.000159151						1003	Lmtk2	up	ns	N/A	N/A
1004	Ptprg	0.539765	2.53011e-05		1004	Gm11772	0.491697	0.00015945						1004	Rufy3	up	ns	N/A	N/A
1005	Scrn3	-0.539301	2.57898e-05		1005	Tatdn1	-0.491466	0.000160764						1005	Synpo2	up	ns	N/A	N/A
1006	Fbxo33	-0.538793	2.63349e-05		1006	Olig1	0.491408	0.000161095						1006	Eif4enif1	down	ns	N/A	N/A
1007	Mex3d	0.538385	2.67805e-05		1007	Gm6298	0.491344	0.000161465						1007	Jade1	down	ns	N/A	N/A
1008	Setd7	-0.5382	2.69849e-05		1008	Rab22a	0.491315	0.000161628						1008	Dr1	down	ns	N/A	N/A
1009	R74862	0.538171	2.70168e-05		1009	Rarg	0.491272	0.000161873						1009	Twf2	up	ns	N/A	N/A
1010	Ubl3	-0.537991	2.72168e-05		1010	Gm5507	0.491061	0.000163089						1010	Supt3	up	ns	N/A	N/A
1011	Simc1	0.537778	2.74561e-05		1011	Gm7189	0.490998	0.000163457						1011	Kazald1	up	ns	N/A	N/A
1012	Apol8	-0.537775	2.7459e-05		1012	Tars2	0.49092	0.000163909						1012	Slc23a2	up	ns	N/A	N/A
1013	Soat1	-0.53777	2.7465e-05		1013	Tbca	-0.490909	0.00016397						1013	Bbs7	down	ns	N/A	N/A
1014	Uqcrc2	-0.537742	2.74963e-05		1014	Filip1	0.490631	0.000165594						1014	Prkacb	up	ns	N/A	N/A
1015	Nbea	0.537521	2.7747e-05		1015	Rexo4	0.490469	0.000166548						1015	Mfsd2a	up	ns	N/A	N/A
1016	Prxl2a	0.537331	2.79633e-05		1016	Atmin	0.490446	0.000166684						1016	Mapk1	up	ns	N/A	N/A
1017	Tbc1d12	0.536989	2.8358e-05		1017	Nek9	0.49026	0.000167782						1017	Brms1	up	ns	N/A	N/A
1018	Gatm	0.536908	2.84516e-05		1018	Elovl6	0.490141	0.000168487						1018	Ttbk1	up	ns	N/A	N/A
1019	Cers6	0.536902	2.8458e-05		1019	Ecd	0.489995	0.000169357						1019	Macrod2	down	ns	N/A	N/A
1020	Pde4a	-0.536813	2.85627e-05		1020	Ireb2	-0.489937	0.000169705						1020	H1f4	up	ns	N/A	N/A
1021	Galnt15	0.536715	2.86771e-05		1021	Cdyl	0.489876	0.000170071						1021	Zmym5	down	ns	N/A	N/A
1022	Aacs	0.536494	2.89367e-05		1022	Camkk1	0.48969	0.000171193						1022	Azin2	up	ns	N/A	N/A
1023	Slc30a4	0.536345	2.91135e-05		1023	Gm26772	0.489552	0.000172027						1023	Rab29	up	ns	N/A	N/A
1024	Smoc1	0.536236	2.92434e-05		1024	2900079G21Rik	0.48953	0.000172161						1024	Ctnnb1	down	ns	N/A	N/A
1025	Porcn	-0.535738	2.98434e-05		1025	Phf2os1	0.48943	0.000172768						1025	Chd4	up	ns	N/A	N/A
1026	Nectin3	0.535411	3.02429e-05		1026	Epc1	-0.489349	0.000173266						1026	Lhx1	up	ns	N/A	N/A
1027	Tacr1	-0.535404	3.02521e-05		1027	Xpo6	0.489268	0.000173759						1027	Wasf1	down	ns	N/A	N/A
1028	Zcchc12	0.535363	3.03021e-05		1028	Babam1	0.489214	0.000174089						1028	Dnm2	up	ns	N/A	N/A
1029	Cyp4f14	-0.534868	3.09188e-05		1029	Scrn2	0.488804	0.000176622						1029	Tkt	up	ns	N/A	N/A
1030	Cdk18	-0.534781	3.10277e-05		1030	Laptm4b	0.488419	0.000179031						1030	Stoml2	up	ns	N/A	N/A
1031	Bhlhe40	-0.534491	3.13955e-05		1031	Gpc4	0.488417	0.00017904						1031	Ap3d1	up	ns	N/A	N/A
1032	Sec62	-0.534459	3.1436e-05		1032	Rundc3a	0.488384	0.000179253						1032	Per1	up	ns	N/A	N/A
1033	Dhps	0.534237	3.17209e-05		1033	Tnik	-0.487806	0.000182928						1033	Ppp2r1a	up	ns	N/A	N/A
1034	Hipk3	0.534198	3.17709e-05		1034	Zmym4	-0.48771	0.000183543						1034	Hs6st1	up	ns	N/A	N/A
1035	Shroom2	0.534094	3.19042e-05		1035	Papolg	-0.487602	0.000184241						1035	Phip	down	ns	N/A	N/A
1036	Mrpl44	-0.533709	3.24062e-05		1036	Mib1	-0.48735	0.000185875						1036	Slc25a24	up	ns	N/A	N/A
1037	Ahnak	0.533677	3.24483e-05		1037	H2-T10	0.487246	0.000186552						1037	Bap1	up	ns	N/A	N/A
1038	Gmcl1	0.533566	3.25943e-05		1038	Ncam2	-0.486884	0.000188933						1038	Nkx2-2	up	ns	N/A	N/A
1039	4930593A02Rik	-0.533251	3.30118e-05		1039	2700081O15Rik	0.486758	0.000189766						1039	Cox15	up	ns	N/A	N/A
1040	Necab2	0.533221	3.30529e-05		1040	Akap8	-0.486744	0.000189858						1040	Med23	down	ns	N/A	N/A
1041	Paqr9	-0.532958	3.34049e-05		1041	Pcna-ps2	-0.486653	0.000190464						1041	Synpo	up	ns	N/A	N/A
1042	Akap13	0.532815	3.35984e-05		1042	Zfand3	0.486371	0.000192352						1042	Cxcl16	up	ns	N/A	N/A
1043	Acyp2	-0.532662	3.38072e-05		1043	Xpo1	-0.486329	0.000192629						1043	Ift140	up	ns	N/A	N/A
1044	Gm16168	-0.532535	3.398e-05		1044	Tspan15	0.486322	0.000192677						1044	Aldh5a1	down	ns	N/A	N/A
1045	Snrpd1	0.53235	3.42342e-05		1045	Gm8805	0.485812	0.000196139						1045	mt-Cytb	down	ns	N/A	N/A
1046	Rwdd2a	0.532347	3.42393e-05		1046	Sympk	0.485777	0.000196377						1046	Frzb	up	ns	N/A	N/A
1047	Mpp3	0.531813	3.4983e-05		1047	Gm15675	0.485626	0.000197412						1047	Mvp	up	ns	N/A	N/A
1048	Mmp2	0.531805	3.49942e-05		1048	Ambra1	0.485279	0.000199817						1048	Wnt11	up	ns	N/A	N/A
1049	Etfb	-0.531732	3.50978e-05		1049	Cks2	0.484984	0.000201874						1049	Fbxw8	up	ns	N/A	N/A
1050	Pde10a	0.531467	3.54741e-05		1050	Gstt3	0.484973	0.000201955						1050	Phf8	down	ns	N/A	N/A
1051	Zbtb8os	-0.531405	3.5562e-05		1051	Pdia4	-0.484941	0.000202176						1051	Fgd4	down	ns	N/A	N/A
1052	Dennd6b	-0.531324	3.56781e-05		1052	Gm9796	0.484879	0.000202617						1052	Zmynd11	down	ns	N/A	N/A
1053	Sgsm2	0.531277	3.57457e-05		1053	Ift81	-0.484681	0.000204014						1053	Wfdc1	up	ns	N/A	N/A
1054	Alg2	0.530636	3.66771e-05		1054	Ctif	0.48438	0.00020616						1054	Shc3	up	ns	N/A	N/A
1055	Sh3pxd2a	-0.530435	3.6974e-05		1055	Sh2d3c	0.4842	0.000207448						1055	Slc4a9	up	ns	N/A	N/A
1056	Usp8	-0.530321	3.71418e-05		1056	Kcna2	0.483713	0.000210985						1056	Atp6v0a2	up	ns	N/A	N/A
1057	Lbhd2	-0.53022	3.72927e-05		1057	Efhd1	0.483539	0.000212259						1057	Mef2d	up	ns	N/A	N/A
1058	Syt17	0.529995	3.7631e-05		1058	Rxrb	0.483504	0.000212513						1058	Kcns1	up	ns	N/A	N/A
1059	Gm25986	0.529969	3.76688e-05		1059	Slc15a4	0.483479	0.000212699						1059	Mcam	up	ns	N/A	N/A
1060	Zbtb7c	0.52977	3.79711e-05		1060	Adamtsl1	0.48329	0.000214094						1060	Slc26a2	up	ns	N/A	N/A
1061	Phpt1	0.529679	3.81083e-05		1061	Cdipt	0.48321	0.000214689						1061	Pgf	up	ns	N/A	N/A
1062	Rpl27	0.529511	3.83657e-05		1062	Kdm8	0.4832	0.000214765						1062	Phf20	up	ns	N/A	N/A
1063	Fads1	0.529321	3.86571e-05		1063	Stt3b	-0.483166	0.000215018						1063	Mcm2	up	ns	N/A	N/A
1064	2210408F21Rik	-0.529215	3.88209e-05		1064	Cadm2	-0.482795	0.000217791						1064	Gna13	down	ns	N/A	N/A
1065	Prkca	0.529197	3.88494e-05		1065	Mlxip	0.482559	0.000219573						1065	Atp5e	up	ns	N/A	N/A
1066	Slc25a12	-0.529051	3.9076e-05		1066	Igfbp7	0.482173	0.000222515						1066	Kalrn	down	ns	N/A	N/A
1067	Pgap6	-0.528799	3.94712e-05		1067	2900076A07Rik	-0.481985	0.000223961						1067	Pnpla8	down	ns	N/A	N/A
1068	Yipf6	-0.528457	4.00121e-05		1068	Psmd8	0.481733	0.000225919						1068	Bambi	up	ns	N/A	N/A
1069	Tspyl4	-0.528391	4.0117e-05		1069	Chst8	0.481583	0.000227084						1069	Csnk2b	up	ns	N/A	N/A
1070	Car7	-0.52821	4.04074e-05		1070	Eci1	0.481517	0.000227605						1070	Afdn	down	ns	N/A	N/A
1071	Gm21092	0.527968	4.07988e-05		1071	Trp53i13	0.481315	0.000229186						1071	Smg9	up	ns	N/A	N/A
1072	Il15ra	-0.527777	4.1109e-05		1072	2900005J15Rik	0.481175	0.000230295						1072	Pafah1b2	up	ns	N/A	N/A
1073	Gnaq	0.52766	4.13006e-05		1073	Repin1	-0.481166	0.000230365						1073	Rffl	up	ns	N/A	N/A
1074	Ppp2r3c	0.526791	4.27488e-05		1074	Borcs7	-0.481165	0.000230373						1074	Smarce1	down	ns	N/A	N/A
1075	Gm11660	0.526738	4.28391e-05		1075	Gm11557	0.480995	0.000231726						1075	Abr	up	ns	N/A	N/A
1076	Desi1	-0.526663	4.29656e-05		1076	Nek4	0.480843	0.000232934						1076	Cldn5	up	ns	N/A	N/A
1077	Psmd10	0.526626	4.30294e-05		1077	Smdt1	0.48071	0.000233999						1077	Slk	down	ns	N/A	N/A
1078	Hes6	0.526469	4.3297e-05		1078	Gm13054	0.480699	0.000234089						1078	Actr6	down	ns	N/A	N/A
1079	Gpr150	0.526239	4.36934e-05		1079	Pnmal2	0.480478	0.000235871						1079	Sertad1	up	ns	N/A	N/A
1080	Ostc	0.526195	4.37685e-05		1080	Grk5	0.480134	0.000238669						1080	Kank1	up	ns	N/A	N/A
1081	Rcor1	-0.525844	4.43802e-05		1081	Cnot3	0.479951	0.000240176						1081	Slc24a2	up	ns	N/A	N/A
1082	Dnajc13	0.52562	4.47752e-05		1082	Derl1	0.479722	0.000242066						1082	Dok5	down	ns	N/A	N/A
1083	Copz1	0.52551	4.49695e-05		1083	Cox11	0.479618	0.000242923						1083	Sertad3	up	ns	N/A	N/A
1084	B4galt1	0.525197	4.55268e-05		1084	Mrps18c	-0.479612	0.000242975						1084	Mier1	down	ns	N/A	N/A
1085	Snx25	0.524627	4.65607e-05		1085	Rbmx	-0.479599	0.000243081						1085	Ift20	up	ns	N/A	N/A
1086	Sptlc2	0.524098	4.75382e-05		1086	Zfp763	-0.479515	0.000243781						1086	Clp1	up	ns	N/A	N/A
1087	Rab34	0.524026	4.76727e-05		1087	Thg1l	-0.479273	0.000245806						1087	Suds3	up	ns	N/A	N/A
1088	Arl6	0.523989	4.77422e-05		1088	Psmg3	0.479139	0.000246936						1088	Wnk4	up	ns	N/A	N/A
1089	Gm16164	-0.523777	4.81415e-05		1089	Hcn4	0.478828	0.000249574						1089	Kdm2a	up	ns	N/A	N/A
1090	Vsig10l	0.523659	4.83654e-05		1090	Jade3	-0.478489	0.000252478						1090	Csnk1g2	up	ns	N/A	N/A
1091	Mthfd2l	0.523577	4.85204e-05		1091	Cav1	0.478439	0.000252904						1091	Panx2	up	ns	N/A	N/A
1092	Ankrd9	-0.523399	4.88607e-05		1092	B130006D01Rik	0.47826	0.000254451						1092	Me2	up	ns	N/A	N/A
1093	Tnks2	0.523248	4.91502e-05		1093	Eloc	-0.478234	0.000254681						1093	Inhba	up	ns	N/A	N/A
1094	Gpc6	0.52309	4.94546e-05		1094	Brd2	0.477979	0.000256897						1094	Rhot1	up	ns	N/A	N/A
1095	Plekhh3	-0.522837	4.99483e-05		1095	Nacc1	0.477723	0.000259144						1095	Tra2b	down	ns	N/A	N/A
1096	Pif1	0.522534	5.05429e-05		1096	Dcaf5	0.477261	0.000263247						1096	Rapgef2	down	ns	N/A	N/A
1097	Coro1a	0.522393	5.08217e-05		1097	Thoc1	-0.477183	0.000263948						1097	Ccar1	down	ns	N/A	N/A
1098	Fkbp2	-0.522345	5.09165e-05		1098	2610035D17Rik	0.477101	0.000264684						1098	Rab23	down	ns	N/A	N/A
1099	Snhg9	0.522265	5.10773e-05		1099	Tug1	-0.477088	0.000264797						1099	Sesn1	down	ns	N/A	N/A
1100	Gna14	-0.522246	5.11149e-05		1100	Relt	0.477028	0.000265343						1100	Git1	up	ns	N/A	N/A
1101	Micu1	-0.521433	5.27608e-05		1101	Gkap1	-0.47659	0.000269313						1101	Stard10	up	ns	N/A	N/A
1102	Ccnl2	0.521353	5.29259e-05		1102	Th	-0.476341	0.000271597						1102	H2aj	up	ns	N/A	N/A
1103	Gm14164	0.521025	5.36048e-05		1103	Ucn	0.476262	0.00027232						1103	Paqr3	up	ns	N/A	N/A
1104	Smim7	0.520958	5.3746e-05		1104	Kmt2e	-0.476173	0.000273142						1104	Dnajb2	up	ns	N/A	N/A
1105	S100pbp	0.520541	5.46239e-05		1105	Gm10801	-0.475964	0.000275086						1105	Gorasp1	up	ns	N/A	N/A
1106	Gjc2	-0.520072	5.56267e-05		1106	Pan3	-0.475734	0.000277229						1106	Lama4	up	ns	N/A	N/A
1107	Pip4k2a	-0.520019	5.57398e-05		1107	Gm8756	0.475682	0.000277721						1107	Tssk6	up	ns	N/A	N/A
1108	Asah1	0.520012	5.57552e-05		1108	Grm4	0.475505	0.000279383						1108	Ssr4	up	ns	N/A	N/A
1109	Kdm6b	-0.519936	5.59205e-05		1109	Gm12989	0.47546	0.000279806						1109	Ttpa	up	ns	N/A	N/A
1110	Ndufa7	0.519834	5.61413e-05		1110	Marchf8	-0.475291	0.000281412						1110	St6gal1	up	ns	N/A	N/A
1111	Hivep1	0.519785	5.62487e-05		1111	Dtd2	-0.475212	0.000282158						1111	Snap47	up	ns	N/A	N/A
1112	Mmp11	0.519707	5.64185e-05		1112	Tpbgl	0.475179	0.000282479						1112	Cntnap2	up	ns	N/A	N/A
1113	Glod5	0.519481	5.6914e-05		1113	Cpm	0.475118	0.000283055						1113	Ulk1	up	ns	N/A	N/A
1114	Snrnp40	0.519371	5.7157e-05		1114	Fbxl6	0.47505	0.000283708						1114	Sigmar1	up	ns	N/A	N/A
1115	Pmpcb	-0.519199	5.75396e-05		1115	Gm17344	0.474888	0.000285259						1115	Babam2	up	ns	N/A	N/A
1116	Wnt5b	-0.519021	5.79355e-05		1116	0610010K14Rik	0.474814	0.000285978						1116	Bax	up	ns	N/A	N/A
1117	Ptpa	-0.518819	5.83905e-05		1117	Fbxw4	0.474711	0.000286971						1117	Bspry	up	ns	N/A	N/A
1118	Mydgf	0.518431	5.92704e-05		1118	Cops7a	0.474456	0.000289449						1118	Ogt	down	ns	N/A	N/A
1119	Dusp11	0.518391	5.93639e-05		1119	Flot1	0.474054	0.000293386						1119	Mecp2	down	ns	N/A	N/A
1120	Chsy1	0.518306	5.95586e-05		1120	Luc7l	-0.474009	0.000293832						1120	Crhr1	up	ns	N/A	N/A
1121	Lrrk1	0.518104	6.00233e-05		1121	Tdrd3	-0.473981	0.000294107						1121	Brsk1	up	ns	N/A	N/A
1122	Plin2	0.51796	6.03567e-05		1122	Atg9b	0.473959	0.000294323						1122	Dbnl	up	ns	N/A	N/A
1123	Abhd16a	-0.517732	6.08887e-05		1123	Atad2	0.473726	0.000296645						1123	Slc25a13	up	ns	N/A	N/A
1124	Cdo1	0.517637	6.11121e-05		1124	Apba2	0.473709	0.000296809						1124	Ano8	up	ns	N/A	N/A
1125	Taf2	0.517553	6.13117e-05		1125	Zdhhc16	0.473523	0.000298669						1125	Mmp28	up	ns	N/A	N/A
1126	Crb2	0.517294	6.19234e-05		1126	Magt1	0.473387	0.000300036						1126	Gpr68	up	ns	N/A	N/A
1127	Klhdc8a	-0.517003	6.26199e-05		1127	Zfp511	-0.473362	0.000300285						1127	Id1	up	ns	N/A	N/A
1128	Kctd7	-0.516781	6.31559e-05		1128	Atg2a	0.473265	0.000301272						1128	Actl6a	up	ns	N/A	N/A
1129	1110004F10Rik	0.516771	6.318e-05		1129	Trim23	-0.473183	0.000302096						1129	Ppox	up	ns	N/A	N/A
1130	Usp11	0.516611	6.3571e-05		1130	Atp1a2	0.473005	0.000303911						1130	Suz12	down	ns	N/A	N/A
1131	Cish	0.516345	6.42211e-05		1131	Pdss2	0.472687	0.000307165						1131	Mbd3	up	ns	N/A	N/A
1132	Acaa2	0.516324	6.42732e-05		1132	Coq5	0.472674	0.000307297						1132	Kdm4c	down	ns	N/A	N/A
1133	Bcas1	-0.516319	6.4285e-05		1133	Lmtk2	0.472546	0.000308617						1133	Plxnb2	down	ns	N/A	N/A
1134	Dlat	-0.515941	6.52221e-05		1134	Lnpk	-0.472379	0.000310347						1134	Ccnb1	up	ns	N/A	N/A
1135	9330132A10Rik	0.515665	6.59148e-05		1135	Fgfrl1	0.472375	0.000310386						1135	Trim28	up	ns	N/A	N/A
1136	Fndc3a	0.515537	6.62389e-05		1136	Zfp759	0.472106	0.000313193						1136	Elavl3	up	ns	N/A	N/A
1137	Celf5	0.515375	6.66506e-05		1137	1700037H04Rik	0.472036	0.000313932						1137	Dag1	up	ns	N/A	N/A
1138	Acvr1b	0.515061	6.74547e-05		1138	Gm15594	0.471752	0.000316915						1138	Lrfn4	up	ns	N/A	N/A
1139	Tmem88b	-0.514957	6.77233e-05		1139	Septin9	0.471736	0.000317084						1139	Rep15	up	ns	N/A	N/A
1140	Usp27x	0.514901	6.78668e-05		1140	Rufy3	0.471521	0.000319379						1140	Clcn3	down	ns	N/A	N/A
1141	Zfp280b	-0.514897	6.78787e-05		1141	Fam83d	0.471519	0.000319395						1141	Ier2	up	ns	N/A	N/A
1142	Ano2	0.514746	6.82711e-05		1142	9530080O11Rik	0.471428	0.000320361						1142	Rnd1	up	ns	N/A	N/A
1143	S100g	-0.514641	6.85443e-05		1143	Synpo2	0.47102	0.000324755						1143	Stx2	up	ns	N/A	N/A
1144	Tmem135	-0.514371	6.92526e-05		1144	Eif4enif1	-0.470904	0.000326009						1144	Prkcsh	up	ns	N/A	N/A
1145	Sv2a	-0.514178	6.97646e-05		1145	AI429214	0.470813	0.000327002						1145	Slc12a4	up	ns	N/A	N/A
1146	Cyp4x1	0.51374	7.09365e-05		1146	Gm12791	0.470447	0.00033101						1146	Kif17	up	ns	N/A	N/A
1147	Dnajc27	-0.513635	7.12202e-05		1147	Far1	-0.470306	0.000332569						1147	Mmp24	up	ns	N/A	N/A
1148	Frrs1	0.513597	7.13235e-05		1148	Emd	0.469815	0.00033803						1148	Lcn2	up	ns	N/A	N/A
1149	Epn2	0.513415	7.1817e-05		1149	Scand1	0.469465	0.000341988						1149	Gatad2b	up	ns	N/A	N/A
1150	Itpa	0.512727	7.37181e-05		1150	Phax	0.469356	0.000343224						1150	Dtx1	up	ns	N/A	N/A
1151	Ppp1r12c	-0.512486	7.43921e-05		1151	Ttf2	0.469145	0.000345629						1151	Sema3f	up	ns	N/A	N/A
1152	Actr3	0.512255	7.50459e-05		1152	Sec22c	-0.468931	0.000348092						1152	Ppp1r9b	up	ns	N/A	N/A
1153	Col26a1	0.512229	7.51192e-05		1153	Ube4a	0.46884	0.000349136						1153	Slc39a10	down	ns	N/A	N/A
1154	Prep	0.51215	7.53454e-05		1154	Ripply2	0.468783	0.000349805						1154	Bmpr1b	up	ns	N/A	N/A
1155	Frmd3	0.511995	7.57888e-05		1155	Mns1	0.468686	0.000350925						1155	Sh3gl2	up	ns	N/A	N/A
1156	Dynlrb1	0.511716	7.65902e-05		1156	Poc5	0.468602	0.000351899						1156	Btbd6	up	ns	N/A	N/A
1157	Ebi3	0.511293	7.78237e-05		1157	Bace2	0.468575	0.000352209						1157	Map1s	up	ns	N/A	N/A
1158	Rpn2	0.511255	7.79364e-05		1158	Nol7	-0.468441	0.000353783						1158	Dek	down	ns	N/A	N/A
1159	Prdx3	-0.510771	7.93714e-05		1159	Jade1	-0.468322	0.000355176						1159	Wasf3	up	ns	N/A	N/A
1160	Gm13828	-0.510758	7.94104e-05		1160	RP23-103I12.13	0.467809	0.000361242						1160	Fgf14	up	ns	N/A	N/A
1161	Nxnl2	0.510592	7.9908e-05		1161	Phactr1	0.467754	0.000361898						1161	Vegfb	up	ns	N/A	N/A
1162	Smurf2	0.510547	8.00422e-05		1162	Irak4	0.467423	0.000365874						1162	Rab3b	up	ns	N/A	N/A
1163	Scml2	0.510404	8.04737e-05		1163	Dr1	-0.467027	0.00037067						1163	Ufl1	down	ns	N/A	N/A
1164	Pard6a	-0.509997	8.17149e-05		1164	Dlst	0.46679	0.000373573						1164	Arid4b	down	ns	N/A	N/A
1165	Amn1	0.509733	8.25316e-05		1165	Dnah9	0.466582	0.000376144						1165	Stim2	up	ns	N/A	N/A
1166	Aifm3	-0.509601	8.29402e-05		1166	Cmip	0.466523	0.000376874						1166	Slc25a23	up	ns	N/A	N/A
1167	Scrt2	-0.509528	8.31693e-05		1167	Syce1l	0.46618	0.000381134						1167	Rab8a	down	ns	N/A	N/A
1168	Nr0b2	-0.509045	8.46864e-05		1168	Ppp1r13l	0.46611	0.00038202						1168	Arid1a	down	ns	N/A	N/A
1169	Gm10269	0.508966	8.49395e-05		1169	Gm16618	0.465851	0.000385278						1169	Grid1	up	ns	N/A	N/A
1170	Dctn6	0.508895	8.51643e-05		1170	Med27	0.465328	0.000391934						1170	Hey2	up	ns	N/A	N/A
1171	Npm1	0.508711	8.57547e-05		1171	Twf2	0.465006	0.000396093						1171	Rnf8	up	ns	N/A	N/A
1172	Mtf2	0.508204	8.73945e-05		1172	Flvcr1	-0.464863	0.000397946						1172	Slc12a6	up	ns	N/A	N/A
1173	Dnajc18	-0.508048	8.79044e-05		1173	Rtl4	0.46468	0.000400339						1173	Stmn3	up	ns	N/A	N/A
1174	Cyth1	-0.507953	8.82174e-05		1174	Supt3	0.464594	0.000401467						1174	Pdcd10	down	ns	N/A	N/A
1175	Aqr	0.507927	8.8304e-05		1175	Kazald1	0.463869	0.000411083						1175	Ubtf	up	ns	N/A	N/A
1176	Lysmd4	-0.507769	8.88252e-05		1176	Drap1	0.463839	0.000411475						1176	Atp5b	up	ns	N/A	N/A
1177	Hecw1	-0.507736	8.89366e-05		1177	Lrp8os3	0.46356	0.000415238						1177	Napa	up	ns	N/A	N/A
1178	D630045J12Rik	0.507656	8.92005e-05		1178	Sra1	-0.463456	0.00041664						1178	Capn7	down	ns	N/A	N/A
1179	Rnf130	-0.507642	8.9247e-05		1179	Gba	0.463036	0.00042238						1179	Sfxn3	up	ns	N/A	N/A
1180	Map3k6	0.507625	8.93044e-05		1180	1700007K13Rik	0.462698	0.00042705						1180	Tle6	up	ns	N/A	N/A
1181	Pi15	0.507612	8.9349e-05		1181	Mprip	0.462674	0.00042738						1181	Chrna5	up	ns	N/A	N/A
1182	A730020M07Rik	-0.507501	8.97194e-05		1182	Slc23a2	0.462524	0.000429468						1182	Vtn	up	ns	N/A	N/A
1183	Hey1	-0.507205	9.07154e-05		1183	4930520O04Rik	0.462359	0.00043177						1183	Dock4	down	ns	N/A	N/A
1184	Stk39	-0.50716	9.08674e-05		1184	Traf2	0.462254	0.00043324						1184	Wdr5	up	ns	N/A	N/A
1185	St3gal3	-0.506891	9.17795e-05		1185	Larp7	0.462134	0.000434929						1185	Cxcl14	up	ns	N/A	N/A
1186	Carhsp1	0.506838	9.1962e-05		1186	Gm14285	0.462049	0.000436142						1186	Setd1b	down	ns	N/A	N/A
1187	Rap1gap	-0.506659	9.25759e-05		1187	Zfp606	-0.462024	0.000436484						1187	Slc32a1	up	ns	N/A	N/A
1188	4930563E22Rik	0.506428	9.33739e-05		1188	6330409D20Rik	0.461692	0.000441203						1188	Vrk3	down	ns	N/A	N/A
1189	Ufc1	-0.506392	9.35003e-05		1189	Zfp277	-0.461579	0.000442826						1189	Cabin1	up	ns	N/A	N/A
1190	Tmem9b	0.506373	9.35658e-05		1190	Bbs7	-0.461484	0.000444197						1190	Pla2g6	up	ns	N/A	N/A
1191	Tmem25	-0.506372	9.35706e-05		1191	Gm15545	0.461106	0.000449661						1191	Dbn1	up	ns	N/A	N/A
1192	B230216N24Rik	0.506293	9.38443e-05		1192	Eral1	0.460906	0.000452578						1192	Kcnc4	up	ns	N/A	N/A
1193	Npc2	0.505718	9.58693e-05		1193	Prkacb	0.460896	0.000452724						1193	Eif2ak4	down	ns	N/A	N/A
1194	Gm13597	0.505678	9.60117e-05		1194	Dusp6	-0.460857	0.000453296						1194	Slc5a3	down	ns	N/A	N/A
1195	Lmbrd1	-0.505463	9.67783e-05		1195	Mfsd2a	0.460595	0.000457146						1195	Wnt5a	up	ns	N/A	N/A
1196	Trpc7	0.505414	9.69555e-05		1196	Gm15129	0.460546	0.000457864						1196	Slc12a7	up	ns	N/A	N/A
1197	Ddr1	-0.505396	9.70208e-05		1197	Ldhd	0.460449	0.000459298						1197	Impact	down	ns	N/A	N/A
1198	Vdac3	0.50537	9.71124e-05		1198	Fundc2	-0.46032	0.000461222						1198	Nhsl1	down	ns	N/A	N/A
1199	Zfp239	0.505213	9.76806e-05		1199	Btrc	0.460282	0.000461774						1199	Rit2	down	ns	N/A	N/A
1200	Maml2	0.504994	9.8473e-05		1200	Klhl28	0.460262	0.000462084						1200	Chrnb1	up	ns	N/A	N/A
1201	Rabgap1	0.504928	9.87135e-05		1201	Gm10558	-0.460056	0.000465156						1201	Nkx6-2	up	ns	N/A	N/A
1202	B630019K06Rik	-0.504812	9.91394e-05		1202	Mmp17	0.45984	0.000468402						1202	Mrtfa	up	ns	N/A	N/A
1203	Gjd2	-0.50476	9.9329e-05		1203	Aspscr1	0.459834	0.000468491						1203	Strip2	down	ns	N/A	N/A
1204	Cd248	0.50466	9.96968e-05		1204	Erlec1	-0.459682	0.000470793						1204	Grik5	up	ns	N/A	N/A
1205	Gjb3	0.504571	0.000100026		1205	Mirg	0.459666	0.000471032						1205	Hyal1	up	ns	N/A	N/A
1206	Klhl18	0.504526	0.000100193		1206	Mapk1	0.459632	0.000471546						1206	Chrnb2	up	ns	N/A	N/A
1207	Map4k3	0.504515	0.000100233		1207	Tmem250-ps	0.459475	0.000473948						1207	Grin2d	up	ns	N/A	N/A
1208	Fam168b	-0.504078	0.000101865		1208	Brms1	0.45923	0.000477689						1208	Edn2	up	ns	N/A	N/A
1209	Tagln	0.503941	0.000102378		1209	Emc8	0.459205	0.000478066						1209	Hck	up	ns	N/A	N/A
1210	Slc9a6	0.503936	0.0001024		1210	Cdc34b	0.459198	0.000478186						1210	Atp5l-ps1	up	ns	N/A	N/A
1211	Ptrh2	0.503827	0.00010281		1211	Ttbk1	0.45918	0.000478464						1211	Smarcad1	down	ns	N/A	N/A
1212	Acyp1	-0.503759	0.00010307		1212	Macrod2	-0.459101	0.00047967						1212	Tsg101	down	ns	N/A	N/A
1213	Lgalsl	0.503493	0.000104083		1213	Sarnp	-0.458863	0.000483357						1213	Ncmap	up	ns	N/A	N/A
1214	Rack1	0.503372	0.000104548		1214	H1f4	0.458842	0.000483682						1214	Cdc42ep1	up	ns	N/A	N/A
1215	mt-Co1	0.503182	0.000105282		1215	Paxbp1	-0.458832	0.000483843						1215	Palm	up	ns	N/A	N/A
1216	B3gnt5	0.502867	0.000106509		1216	Rnls	0.458829	0.000483884						1216	Nanos1	down	ns	N/A	N/A
1217	Cnih3	0.502512	0.000107908		1217	Cyb5r1	0.458628	0.000487007						1217	Fgd1	up	ns	N/A	N/A
1218	Phlda1	-0.502323	0.000108659		1218	Aasdh	0.458506	0.000488918						1218	Map3k1	down	ns	N/A	N/A
1219	Mab21l2	0.502268	0.000108876		1219	Zfp446	0.458362	0.000491186						1219	Taok1	down	ns	N/A	N/A
1220	Gm10443	0.50194	0.000110193		1220	Zmym5	-0.458355	0.000491301						1220	Pin1	up	ns	N/A	N/A
1221	Aplp1	0.501737	0.000111018		1221	Ccdc189	0.458342	0.000491495						1221	Fnbp1	up	ns	N/A	N/A
1222	Klhl13	0.501691	0.000111205		1222	Azin2	0.458342	0.000491506						1222	Rif1	down	ns	N/A	N/A
1223	Mfn2	-0.50163	0.000111453		1223	Cep170	-0.458132	0.000494825						1223	Cpox	up	ns	N/A	N/A
1224	5031439G07Rik	-0.501502	0.000111976		1224	Dph1	0.457818	0.000499822						1224	Rab13	up	ns	N/A	N/A
1225	Znrf2	0.500391	0.000116617		1225	Hacd3	0.457485	0.000505167						1225	Rit1	up	ns	N/A	N/A
1226	Apba3	-0.500263	0.00011716		1226	Rex1bd	0.457362	0.000507173						1226	Rb1	down	ns	N/A	N/A
1227	Apbb2	0.499485	0.000120528		1227	Cfap97	0.457355	0.000507285						1227	Abcd3	up	ns	N/A	N/A
1228	Eif1a	0.499334	0.000121191		1228	Rab29	0.457106	0.000511334						1228	H1f5	up	ns	N/A	N/A
1229	Srrm1	0.499251	0.000121558		1229	Ctnnb1	-0.45684	0.000515683						1229	Znhit1	up	ns	N/A	N/A
1230	Mus81	-0.49919	0.000121829		1230	Raver1	0.456815	0.000516098						1230	Gja4	up	ns	N/A	N/A
1231	Lck	0.499163	0.000121947		1231	1700030M09Rik	0.456683	0.000518275						1231	Kat6a	down	ns	N/A	N/A
1232	Gm24451	0.499157	0.000121971		1232	Gm27040	0.456647	0.000518877						1232	Cpne9	up	ns	N/A	N/A
1233	Acss2	-0.498879	0.000123209		1233	Uck1	0.456349	0.000523834						1233	Bud23	up	ns	N/A	N/A
1234	Letmd1	0.498665	0.000124169		1234	Ing1	0.456239	0.000525662						1234	Mbtd1	down	ns	N/A	N/A
1235	Trp53bp1	0.498591	0.000124504		1235	Ap3s1	-0.456176	0.000526724						1235	Fut10	up	ns	N/A	N/A
1236	Zfp292	0.498542	0.000124725		1236	Rpl38	0.456067	0.000528556						1236	Eif4g2	down	ns	N/A	N/A
1237	Ehbp1l1	0.498064	0.000126907		1237	Thap4	0.455943	0.00053064						1237	Adgrg1	up	ns	N/A	N/A
1238	Mcrs1	0.497853	0.00012788		1238	Mis12	0.455925	0.000530946						1238	Tsc1	down	ns	N/A	N/A
1239	Ttc33	-0.497698	0.0001286		1239	Arhgap11a	0.455903	0.000531324						1239	Tmc7	down	ns	N/A	N/A
1240	Dnaja1	0.497243	0.00013073		1240	Chd4	0.455869	0.000531903						1240	Taf1	down	ns	N/A	N/A
1241	Clasp1	-0.496859	0.000132557		1241	9530059O14Rik	0.45558	0.000536809						1241	Rnf41	up	ns	N/A	N/A
1242	Fundc1	-0.496839	0.000132652		1242	Lhx1	0.455197	0.00054338						1242	Lrrtm3	up	ns	N/A	N/A
1243	Pllp	-0.496775	0.00013296		1243	Rfc4	0.45511	0.000544886						1243	Bloc1s1	up	ns	N/A	N/A
1244	Sox12	0.496557	0.000134009		1244	Pdss1	-0.455073	0.000545531						1244	Kat2b	down	ns	N/A	N/A
1245	Elof1	0.496475	0.000134404		1245	Wasf1	-0.454558	0.000554513						1245	Gucy1b1	down	ns	N/A	N/A
1246	Sacm1l	-0.496409	0.000134721		1246	Taf7	-0.454421	0.000556912						1246	Slc12a1	down	ns	N/A	N/A
1247	Kcnq4	0.496304	0.000135234		1247	Dnm2	0.45393	0.000565639						1247	Xrcc1	down	ns	N/A	N/A
1248	Fam124a	0.495825	0.000137586		1248	Tkt	0.45383	0.000567429						1248	Metrn	up	ns	N/A	N/A
1249	Senp3	0.495601	0.0001387		1249	Tmem94	0.453798	0.000568016						1249	Mrgbp	down	ns	N/A	N/A
1250	Gja1	0.495438	0.000139513		1250	Dhodh	0.453529	0.000572858						1250	Lrfn2	up	ns	N/A	N/A
1251	B3gnt2	0.495164	0.000140891		1251	Pik3r2	0.453485	0.000573661						1251	Ddx11	up	ns	N/A	N/A
1252	Greb1	0.495006	0.000141692		1252	Ccnc	-0.453485	0.000573661						1252	Frmd5	down	ns	N/A	N/A
1253	Gpx8	0.494822	0.00014263		1253	Zfp692	0.453406	0.000575086						1253	Chrm4	down	ns	N/A	N/A
1254	A930024E05Rik	-0.494671	0.000143407		1254	Stoml2	0.453384	0.000575487						1254	Rhod	up	ns	N/A	N/A
1255	Trf	-0.494503	0.000144268		1255	Usp32	-0.453265	0.000577649						1255	Slit3	up	ns	N/A	N/A
1256	Gm15418	-0.494164	0.000146031		1256	Ap3d1	0.453254	0.000577859						1256	Sptbn2	up	ns	N/A	N/A
1257	Timp1	0.494078	0.000146479		1257	Ubash3b	-0.45312	0.000580296						1257	Gdpd5	up	ns	N/A	N/A
1258	Relch	0.493365	0.000150259		1258	Gm16222	0.453008	0.00058235						1258	Grcc10	up	ns	N/A	N/A
1259	Atp5pb	-0.493242	0.000150923		1259	Svil	0.45297	0.00058305						1259	Plcg2	up	ns	N/A	N/A
1260	Rpl30	0.492802	0.000153306		1260	Mgmt	0.452906	0.000584231						1260	Slc38a5	up	ns	N/A	N/A
1261	Zfp711	0.492334	0.000155885		1261	Per1	0.452894	0.000584461						1261	Aldh1a7	up	ns	N/A	N/A
1262	Vezt	0.492208	0.000156581		1262	Praf2	0.452828	0.000585679						1262	Chd5	down	ns	N/A	N/A
1263	Dysf	-0.492137	0.000156981		1263	Gm12924	0.452758	0.000586959						1263	Taf10	up	ns	N/A	N/A
1264	Hcrtr1	0.491971	0.000157911		1264	AA986860	0.452686	0.000588299						1264	Gas8	up	ns	N/A	N/A
1265	Phc2	-0.491763	0.000159082		1265	Gm26670	0.452084	0.000599556						1265	Pkn2	up	ns	N/A	N/A
1266	Iffo1	-0.491306	0.000161683		1266	Ssb	-0.452067	0.000599875						1266	P2ry6	up	ns	N/A	N/A
1267	Gm6166	0.490931	0.000163845		1267	Ube2j1	0.451965	0.000601809						1267	Slc37a4	up	ns	N/A	N/A
1268	Tbcc	-0.490375	0.000167101		1268	Akr7a5	0.451902	0.000602998						1268	Myh10	up	ns	N/A	N/A
1269	Zfp423	0.4902	0.000168139		1269	Qrfprl	0.451879	0.000603425						1269	Vcl	up	ns	N/A	N/A
1270	Gatd3a	-0.490173	0.000168295		1270	Zfp820	0.451828	0.000604408						1270	Ext1	down	ns	N/A	N/A
1271	Slc6a8	-0.489666	0.00017134		1271	Tmem131	-0.451773	0.000605453						1271	Zeb1	up	ns	N/A	N/A
1272	Gnai1	0.489567	0.000171935		1272	Slc25a39	0.451609	0.000608575						1272	Cracr2b	up	ns	N/A	N/A
1273	Marchf4	0.489474	0.000172501		1273	Ppp2r1a	0.451508	0.000610498						1273	Egr1	up	ns	N/A	N/A
1274	Cdip1	-0.489146	0.000174508		1274	Prpsap2	-0.451349	0.000613556						1274	Twsg1	down	ns	N/A	N/A
1275	Gpd1	-0.489099	0.000174798		1275	Timmdc1	-0.451283	0.00061483						1275	Ntsr1	down	ns	N/A	N/A
1276	Jazf1	0.488991	0.000175464		1276	Wdr25	0.451233	0.000615797						1276	Aqp4	up	ns	N/A	N/A
1277	Slc25a37	-0.488436	0.000178925		1277	Hs6st1	0.4511	0.000618374						1277	Ada	up	ns	N/A	N/A
1278	Bcat1	-0.488302	0.000179769		1278	Phip	-0.450999	0.000620337						1278	Micall2	up	ns	N/A	N/A
1279	Tnk2	-0.487894	0.00018236		1279	Pigz	0.450997	0.00062038						1279	Epha8	up	ns	N/A	N/A
1280	Ap2b1	0.487657	0.000183883		1280	Egln1	0.450849	0.000623251						1280	Iqgap1	down	ns	N/A	N/A
1281	Zbtb41	0.487621	0.000184115		1281	Secisbp2l	-0.450799	0.000624228						1281	Ryr3	down	ns	N/A	N/A
1282	4930526A20Rik	0.487085	0.000187607		1282	Tdrd1	0.450711	0.000625963						1282	Cdkl5	up	ns	N/A	N/A
1283	Dld	-0.48698	0.000188299		1283	E130307A14Rik	-0.450477	0.000630556						1283	Nme7	up	ns	N/A	N/A
1284	Vstm5	0.486838	0.000189236		1284	Fam227b	0.450352	0.000633034						1284	Rlf	up	ns	N/A	N/A
1285	Efnb2	0.486687	0.000190237		1285	Gm20033	0.450164	0.000636768						1285	Slc17a7	up	ns	N/A	N/A
1286	Tnks1bp1	-0.486545	0.000191186		1286	Slc25a24	0.449973	0.000640582						1286	Dennd5a	down	ns	N/A	N/A
1287	Fam78a	-0.486486	0.000191576		1287	Mrap2	0.449444	0.000651245						1287	Gpr89	up	ns	N/A	N/A
1288	Gria4	-0.486312	0.000192743		1288	B3galt4	0.449028	0.000659757						1288	Cacnb4	up	ns	N/A	N/A
1289	Gm24204	-0.486019	0.000194726		1289	Bap1	0.448841	0.000663615						1289	Grm2	up	ns	N/A	N/A
1290	Hs3st1	0.485938	0.00019528		1290	Ercc1	0.448782	0.000664836						1290	Hltf	down	ns	N/A	N/A
1291	2610524H06Rik	0.485917	0.000195419		1291	Gm26597	0.448711	0.000666304						1291	Ptchd1	up	ns	N/A	N/A
1292	Grn	0.485831	0.000196009		1292	Acsbg1	0.448623	0.000668135						1292	Zfp639	down	ns	N/A	N/A
1293	Amer3	0.485725	0.000196735		1293	Gm15397	0.448611	0.000668377						1293	Pabpc1l	up	ns	N/A	N/A
1294	Scd3	-0.484797	0.000203196		1294	Nkx2-2	0.448584	0.000668942						1294	Strip1	up	ns	N/A	N/A
1295	Grm1	-0.484402	0.000205999		1295	Chchd5	0.448524	0.000670194						1295	Hectd1	down	ns	N/A	N/A
1296	Slc1a3	0.484377	0.000206181		1296	Stim1	0.448047	0.000680205						1296	Idh2	down	ns	N/A	N/A
1297	Zbtb18	-0.484144	0.000207853		1297	Eif1ax	-0.44797	0.000681824						1297	Ank3	down	ns	N/A	N/A
1298	Kcnk12	-0.484051	0.000208528		1298	Ncapg2	0.447806	0.000685316						1298	Pln	up	ns	N/A	N/A
1299	Igsf21	-0.483889	0.000209702		1299	B230217O12Rik	0.447732	0.000686885						1299	Nap1l4	up	ns	N/A	N/A
1300	Rab15	0.483712	0.000210992		1300	Ddx50	-0.447687	0.000687856						1300	Ddb1	up	ns	N/A	N/A
1301	Myb	-0.483556	0.000212136		1301	Prodh	0.447614	0.0006894						1301	Mmp14	up	ns	N/A	N/A
1302	Lrrcc1	0.483474	0.000212738		1302	Rpusd1	0.447608	0.000689542						1302	Mfsd8	up	ns	N/A	N/A
1303	Dkk1	0.483384	0.000213402		1303	Yod1	-0.447566	0.000690445						1303	Casp6	up	ns	N/A	N/A
1304	Ldb2	0.48334	0.000213723		1304	Cox15	0.447449	0.000692947						1304	Nrgn	up	ns	N/A	N/A
1305	Oprm1	0.483275	0.000214207		1305	Tmem198	0.447403	0.000693933						1305	Nfe2l2	up	ns	N/A	N/A
1306	Stk38l	-0.483258	0.000214334		1306	Gnpnat1	-0.447325	0.000695616						1306	Lingo1	up	ns	N/A	N/A
1307	Slc39a14	-0.483232	0.000214526		1307	Med23	-0.446831	0.000706345						1307	Mycbp2	up	ns	N/A	N/A
1308	Nradd	0.482908	0.000216943		1308	Cfap61	0.446793	0.000707174						1308	Epb41l3	down	ns	N/A	N/A
1309	Gm8292	0.482655	0.000218848		1309	Phldb1	0.446442	0.000714894						1309	Tcf7	up	ns	N/A	N/A
1310	Smc6	0.482386	0.000220886		1310	Dgcr6	0.446353	0.000716862						1310	Vamp2	up	ns	N/A	N/A
1311	Gng4	0.482162	0.000222605		1311	Synpo	0.446276	0.000718577						1311	Lrrc55	up	ns	N/A	N/A
1312	AI593442	-0.482152	0.000222677		1312	Cxcl16	0.446266	0.000718798						1312	Lemd2	up	ns	N/A	N/A
1313	Gpr162	-0.482108	0.000223014		1313	Ergic1	0.446034	0.000723961						1313	Clu	up	ns	N/A	N/A
1314	Gm2a	0.482063	0.000223364		1314	Trappc12	0.445965	0.000725518						1314	Apba1	down	ns	N/A	N/A
1315	Surf2	0.481563	0.000227242		1315	1700001K19Rik	0.445948	0.000725895						1315	Hr	up	ns	N/A	N/A
1316	Armh4	-0.480903	0.000232459		1316	Dnaaf5	0.445818	0.000728813						1316	Pmp22	up	ns	N/A	N/A
1317	Zc3h14	0.480722	0.000233906		1317	Crebzf	-0.445778	0.000729698						1317	Anxa7	up	ns	N/A	N/A
1318	Sema6d	0.480613	0.000234785		1318	Ift140	0.445732	0.000730735						1318	Atp1a1	up	ns	N/A	N/A
1319	Tac1	0.48059	0.000234967		1319	Rps21	0.445725	0.000730906						1319	Nr2f2	down	ns	N/A	N/A
1320	Sfr1	0.480138	0.000238637		1320	Fance	0.445389	0.000738522						1320	Kcns3	up	ns	N/A	N/A
1321	Evl	0.480054	0.000239324		1321	Aldh5a1	-0.445359	0.000739206						1321	Dock5	up	ns	N/A	N/A
1322	Ndrg1	0.479925	0.000240382		1322	Ggact	0.445092	0.000745293						1322	Myo5a	down	ns	N/A	N/A
1323	Umad1	0.479828	0.000241187		1323	mt-Cytb	-0.444994	0.000747553						1323	Bace1	up	ns	N/A	N/A
1324	Gm14277	0.479459	0.000244252		1324	Nek8	0.444897	0.000749778						1324	Amigo1	up	ns	N/A	N/A
1325	Rbm18	0.479273	0.00024581		1325	Sftpc	0.444895	0.000749835						1325	Atxn1	down	ns	N/A	N/A
1326	Cflar	0.478913	0.000248853		1326	Frzb	0.44478	0.000752496						1326	Trim16	up	ns	N/A	N/A
1327	Sdk1	0.478799	0.000249817		1327	A830005F24Rik	0.444428	0.000760678						1327	Plcb1	down	ns	N/A	N/A
1328	Socs5	-0.478606	0.000251468		1328	Mvp	0.444346	0.000762596						1328	Parva	up	ns	N/A	N/A
1329	Dpf2	-0.478495	0.000252426		1329	Gm15266	-0.443475	0.000783244						1329	Inppl1	up	ns	N/A	N/A
1330	Csnk1d	-0.478443	0.00025287		1330	Gm26578	0.443359	0.000786034						1330	Plcl2	down	ns	N/A	N/A
1331	Gpd1l	0.478231	0.000254705		1331	Rnmt	-0.443334	0.00078665						1331	Ptprz1	down	ns	N/A	N/A
1332	Plppr2	0.477954	0.000257119		1332	Wnt11	0.443314	0.000787115						1332	Prkaa2	down	ns	N/A	N/A
1333	Gm6104	0.477799	0.00025848		1333	Sord	0.443168	0.000790661						1333	Sdk2	down	ns	N/A	N/A
1334	Cmss1	0.477445	0.000261605		1334	Shld2	0.442937	0.000796262						1334	Igfbp5	down	ns	N/A	N/A
1335	Ctnna2	0.477397	0.000262033		1335	Junos	0.442927	0.000796497						1335	Rbfox2	down	ns	N/A	N/A
1336	Cep20	0.47734	0.000262544		1336	Gm12691	0.442839	0.000798657						1336	Fblim1	down	ns	N/A	N/A
1337	Arhgap26	0.477244	0.000263402		1337	Aamp	0.442563	0.00080542						1337	Prnp	up	ns	N/A	N/A
1338	Purg	0.47712	0.000264516		1338	Sox10	0.442148	0.000815696						1338	Lrrc8d	down	ns	N/A	N/A
1339	Rps23rg1	-0.476749	0.000267866		1339	Cdc27	-0.441817	0.000823973						1339	Ednrb	down	ns	N/A	N/A
1340	Cib2	0.47664	0.00026886		1340	Rsrp1	-0.441801	0.000824373						1340	Arhgap5	down	ns	N/A	N/A
1341	Spata2l	0.47631	0.000271876		1341	Plgrkt	-0.441585	0.000829813						1341	Slc22a23	down	ns	N/A	N/A
1342	Fam189b	-0.476094	0.00027387		1342	1700030K09Rik	0.441226	0.000838939
1343	Ccdc50	0.475714	0.000277422		1343	Fbxw8	0.440982	0.00084518
1344	6330403K07Rik	0.475614	0.000278355		1344	Thoc2l	-0.440906	0.000847146
1345	Coro1c	0.474831	0.000285814		1345	Rdm1	0.440452	0.000858901
1346	Epb41	-0.474804	0.000286069		1346	Ndufb8	-0.440335	0.000861963
1347	Rnf144b	-0.47444	0.0002896		1347	Tbl3	0.440183	0.000865934
1348	Gpm6b	0.474394	0.000290048		1348	Stac2	0.440129	0.000867377
1349	Grin2c	-0.474298	0.00029099		1349	Bcl7b	0.440105	0.000867988
1350	Colq	-0.474016	0.000293763		1350	Gm12129	0.440028	0.000870023
1351	Gm10327	-0.473792	0.000295987		1351	Phf8	-0.43996	0.000871827
1352	Ipo9	0.473637	0.000297533		1352	Map2k4	0.439881	0.000873918
1353	Ehd2	0.473625	0.000297645		1353	4732414G09Rik	0.43967	0.000879505
1354	Entpd7	-0.473451	0.000299394		1354	Oxld1	0.439648	0.000880096
1355	Gm5393	0.473332	0.000300587		1355	Washc2	0.439618	0.000880899
1356	Cct2	0.47333	0.000300615		1356	Cluh	0.439546	0.000882828
1357	Maml3	0.472645	0.0003076		1357	Tradd	0.439514	0.000883679
1358	Paxx	0.472391	0.000310221		1358	E2f3	0.439434	0.000885818
1359	Elp5	0.472293	0.000311245		1359	Fgd4	-0.438943	0.000899083
1360	Lgi2	-0.471842	0.000315969		1360	Zmynd11	-0.438912	0.000899933
1361	Shank3	0.471808	0.000316323		1361	Lipe	0.438896	0.000900362
1362	Oxtr	0.471656	0.000317933		1362	Gm23849	0.438732	0.000904825
1363	Cldn11	-0.471561	0.00031895		1363	1700112D23Rik	0.438732	0.000904828
1364	Blvrb	-0.471529	0.000319284		1364	Dgcr2	0.438649	0.000907096
1365	Dlg5	0.471487	0.000319741		1365	Wfdc1	0.438489	0.0009115
1366	Sh3yl1	0.47146	0.000320022		1366	Jakmip2	-0.438317	0.000916234
1367	Slc44a1	-0.471295	0.000321792		1367	Shc3	0.438095	0.000922383
1368	Lncenc1	0.470919	0.000325847		1368	Nrbp1	0.438088	0.000922593
1369	Ndufc1	-0.470899	0.000326061		1369	Gm13080	-0.437847	0.000929311
1370	Col4a5	-0.470529	0.000330108		1370	Smg1	-0.437746	0.00093213
1371	Commd10	0.470086	0.000335001		1371	Slc4a9	0.437667	0.000934363
1372	Gadd45gip1	-0.47002	0.000335745		1372	Sf1	0.437638	0.000935167
1373	Smim19	-0.469767	0.000338571		1373	RP24-113D21.1	-0.437605	0.000936094
1374	Nono	0.46957	0.0003408		1374	Exoc5	-0.43754	0.000937946
1375	Dact3	-0.469487	0.00034173		1375	Zfyve16	-0.437445	0.000940611
1376	Ddx24	-0.46938	0.000342951		1376	Dpy19l4	-0.437426	0.000941151
1377	Ephb1	0.469373	0.000343027		1377	Ube2cbp	0.437417	0.000941402
1378	Mtmr4	-0.46922	0.000344777		1378	Urod	0.437364	0.000942915
1379	Catsperz	0.468712	0.000350625		1379	Atp6v0a2	0.436747	0.00096056
1380	Cables2	-0.468484	0.000353276		1380	Hmgn2	-0.436702	0.000961864
1381	Cryga	-0.46844	0.000353786		1381	Fcmr	0.436576	0.000965492
1382	Gm13404	0.468388	0.000354398		1382	Pithd1	0.436546	0.000966384
1383	Upf3b	0.468372	0.000354582		1383	Mef2d	0.436486	0.000968117
1384	Smim1	0.46816	0.000357078		1384	C230037L18Rik	0.436382	0.000971146
1385	Snrpert	0.467853	0.000360721		1385	Trabd	0.436146	0.000978021
1386	Aggf1	-0.467803	0.000361312		1386	Lrrc8a	-0.436085	0.000979814
1387	Vcpip1	-0.467602	0.000363713		1387	Mad1l1	0.436082	0.000979901
1388	Pdcd5	0.467293	0.000367438		1388	Gm8245	0.43603	0.000981435
1389	Pgm2l1	0.467245	0.000368018		1389	Gclm	0.435987	0.0009827
1390	Dipk1a	0.46686	0.00037271		1390	Kcns1	0.435647	0.000992769
1391	Gm5069	-0.466854	0.000372794		1391	Fam168a	0.43544	0.000998909
1392	Gm14200	0.466803	0.00037342		1392	Arl10	0.435192	0.00100634
1393	Tox	0.466501	0.000377139		1393	Mcam	0.435013	0.00101174
1394	Ppp4r1	0.466483	0.000377365		1394	Slc26a2	0.43493	0.00101425
1395	Insyn1	-0.465983	0.000383615		1395	Brix1	-0.43476	0.00101941
1396	Pcca	-0.465966	0.000383821		1396	A230083G16Rik	0.434725	0.00102048
1397	Zc2hc1a	0.465735	0.000386742		1397	Pnpla7	0.434719	0.00102066
1398	H2-Ab1	-0.465706	0.000387114		1398	Ankrd13d	0.434682	0.00102178
1399	Nhp2	0.46568	0.000387438		1399	Pgf	0.43452	0.00102673
1400	Id4	0.465609	0.000388348		1400	Gm10717	-0.43404	0.00104153
1401	Chchd10	-0.465079	0.000395149		1401	Phf20	0.433949	0.00104436
1402	Dnajb14	-0.465057	0.000395432		1402	Gm10240	-0.433801	0.00104897
1403	Amigo3	-0.46493	0.000397075		1403	Mgme1	0.433566	0.00105634
1404	Dpysl4	0.464423	0.000403711		1404	Wbp11	0.433496	0.00105854
1405	Erlin1	0.46383	0.000411606		1405	Lancl3	0.433323	0.00106399
1406	Atp6v1a	-0.46375	0.000412677		1406	Usp28	-0.433223	0.00106715
1407	A2ml1	-0.463741	0.000412795		1407	Ppa1	0.432796	0.00108077
1408	Doc2a	0.463654	0.000413973		1408	2300009A05Rik	0.432754	0.0010821
1409	Arpp19	-0.463471	0.000416437		1409	Lamtor2	0.432739	0.00108259
1410	Krba1	0.463266	0.000419228		1410	Gm14204	0.432707	0.00108361
1411	Lmcd1	-0.463024	0.000422546		1411	Mcm2	0.432505	0.00109014
1412	Rps5	0.463014	0.000422681		1412	Rhov	0.432475	0.0010911
1413	Selenos	0.46284	0.000425084		1413	Gna13	-0.432348	0.00109521
1414	Gtf2a2	0.462795	0.000425707		1414	Atp5e	0.432338	0.00109552
1415	Gm11578	0.462757	0.000426234		1415	Kalrn	-0.432217	0.00109947
1416	Pex2	0.462535	0.000429305		1416	Pnpla8	-0.432211	0.00109965
1417	Scd1	-0.46251	0.000429661		1417	Bambi	0.431968	0.0011076
1418	Gm20645	-0.462504	0.00042974		1418	Evc2	0.43171	0.0011161
1419	Ccdc184	-0.461812	0.000439492		1419	Tmem229a	-0.43152	0.00112238
1420	Smyd1	-0.461788	0.000439845		1420	Tmem98	0.431407	0.00112614
1421	Mfsd14b	-0.461727	0.000440712		1421	Ddost	0.43133	0.00112867
1422	Ptgfrn	0.46159	0.000442672		1422	Daam2	0.431144	0.00113491
1423	D430036J16Rik	0.461501	0.000443949		1423	Rad51ap1	0.431034	0.0011386
1424	Serinc3	-0.461452	0.000444646		1424	Pfas	-0.430805	0.00114631
1425	Msn	-0.461374	0.000445774		1425	St3gal6	0.430661	0.00115117
1426	Nt5dc2	0.461182	0.000448548		1426	Tmbim1	0.430444	0.00115856
1427	Pcyt1a	-0.461049	0.000450479		1427	Fchsd1	-0.430339	0.00116214
1428	Unc79	0.460946	0.000451981		1428	Il17rc	0.430262	0.00116478
1429	Dlgap4	0.460917	0.000452416		1429	4930481B07Rik	0.430255	0.00116502
1430	Trappc2l	0.460679	0.000455896		1430	Csnk2b	0.430102	0.00117027
1431	Dgkd	0.460373	0.000460429		1431	Afdn	-0.42997	0.00117486
1432	Gas2l3	-0.460351	0.000460756		1432	Mpp6	0.429912	0.00117686
1433	Alkbh8	0.460315	0.000461285		1433	Med9	0.42986	0.00117865
1434	Coq8a	-0.460245	0.000462327		1434	Uqcrc1	0.429821	0.00118002
1435	Rpl13a	0.460211	0.000462839		1435	Smg9	0.429734	0.00118303
1436	Cilk1	0.459677	0.000470873		1436	Gm10570	0.429683	0.00118481
1437	Xrn2	0.459566	0.00047255		1437	Tnfrsf12a	0.429637	0.00118639
1438	Gm16372	0.459405	0.000475015		1438	B230110C06Rik	0.429582	0.00118832
1439	Myadml2	-0.459304	0.000476561		1439	Pafah1b2	0.429495	0.00119137
1440	Eif3e	0.459303	0.000476569		1440	Magee1	-0.429405	0.00119453
1441	Eif1b	-0.459298	0.000476645		1441	Lyrm9	0.429382	0.00119532
1442	Gm14016	0.459229	0.000477703		1442	Gm12848	0.42929	0.00119855
1443	Ptpro	0.459076	0.000480066		1443	Rffl	0.429217	0.00120113
1444	Tbc1d9b	-0.458967	0.000481745		1444	Nup155	-0.429164	0.001203
1445	Vamp4	-0.458818	0.000484046		1445	Cyp39a1	0.429143	0.00120373
1446	Steap1	0.458342	0.000491498		1446	Hnrnpa3	-0.42901	0.00120845
1447	Pigg	-0.45825	0.000492949		1447	Prorp	0.428856	0.0012139
1448	Gm10033	-0.457021	0.00051272		1448	Srrd	0.428845	0.00121428
1449	Med19	0.456809	0.000516193		1449	Gm26944	0.428833	0.00121471
1450	Rpl35a	0.456718	0.000517698		1450	Sh3bp5l	0.428807	0.00121564
1451	Notch2	-0.456648	0.000518854		1451	Smarce1	-0.4288	0.0012159
1452	Gas2l1	-0.456566	0.000520217		1452	Abr	0.428684	0.00122005
1453	Gk	-0.456308	0.000524511		1453	Rps4l	-0.428607	0.00122278
1454	Pnma3	0.456043	0.000528964		1454	Tctex1d2	-0.428387	0.00123069
1455	Faap100	0.45602	0.000529348		1455	A830035O19Rik	0.42816	0.00123891
1456	Gpx1	0.455973	0.000530141		1456	Gm25582	0.427951	0.0012465
1457	Gm12180	0.455664	0.000535379		1457	Gm26777	0.427887	0.00124882
1458	Arcn1	0.455326	0.000541161		1458	Fam120a	-0.42785	0.00125016
1459	Dnajc15	-0.455156	0.000544091		1459	Zcchc7	-0.42785	0.00125017
1460	Acadl	-0.455069	0.0005456		1460	Ro60	-0.427822	0.00125119
1461	Ywhaz	0.454967	0.000547362		1461	Mrpl54	0.427817	0.00125139
1462	Bcl2l2	-0.4548	0.000550277		1462	Cryzl1	-0.427786	0.0012525
1463	Pcbd2	-0.454439	0.000556604		1463	Dnajb6	-0.427518	0.00126236
1464	Ciao2b	0.454268	0.000559626		1464	Ankdd1b	0.427492	0.0012633
1465	Mex3a	0.454092	0.000562756		1465	Gm11838	0.42749	0.0012634
1466	Mkrn1	-0.453966	0.000564997		1466	Tfrc	-0.427338	0.00126901
1467	Mmp16	0.453613	0.000571346		1467	Cldn5	0.427235	0.00127283
1468	Gm11413	-0.453322	0.000576622		1468	Slk	-0.426983	0.00128219
1469	Coq3	-0.453182	0.000579176		1469	Pigq	0.426714	0.00129229
1470	Gm14639	0.453065	0.000581307		1470	Mrpl28	0.426522	0.00129955
1471	Lonrf2	0.452403	0.000593574		1471	Smtn	0.426495	0.00130057
1472	Catsperg1	0.451894	0.000603158		1472	Tmem248	0.426428	0.00130309
1473	Oga	0.451547	0.000609754		1473	Gopc	-0.425724	0.00133002
1474	Ccdc92b	-0.451546	0.000609784		1474	Gm26970	0.425669	0.00133216
1475	Lsm1	0.451313	0.000614263		1475	Pdcd6ip	0.425434	0.00134128
1476	Isoc2a	-0.451262	0.000615247		1476	Gm10643	0.425185	0.00135098
1477	Ssr2	0.450994	0.000620428		1477	Gm11942	0.425141	0.00135272
1478	Gm12739	0.450905	0.000622173		1478	Atg4b	0.425086	0.00135486
1479	Apod	-0.450415	0.00063178		1479	Gm7535	0.424952	0.00136015
1480	Bak1	0.450415	0.00063179		1480	Zkscan3	-0.42489	0.00136259
1481	Nhlh2	0.450178	0.000636479		1481	Actr6	-0.424822	0.00136528
1482	Ovgp1	0.450098	0.000638085		1482	Hpgds	0.424821	0.0013653
1483	C2cd2	0.449835	0.000643342		1483	Map1a	0.424806	0.00136593
1484	Sun2	-0.449581	0.000648473		1484	Slc18a2	-0.424729	0.00136894
1485	Nab2	-0.449565	0.000648802		1485	Vit	0.424688	0.00137058
1486	Dolk	-0.44953	0.000649511		1486	Ythdc1	-0.424675	0.00137109
1487	Dtna	0.448979	0.000660768		1487	Foxp4	0.424491	0.00137842
1488	Ccdc47	-0.448882	0.000662754		1488	Cipc	0.424313	0.00138555
1489	Smyd3	0.448737	0.00066575		1489	Sertad1	0.424223	0.00138913
1490	Gm13629	-0.448646	0.000667658		1490	Irgq	0.42421	0.00138965
1491	Mrps17	0.448495	0.000670802		1491	1700001O22Rik	0.424041	0.00139647
1492	Xkrx	-0.448443	0.000671885		1492	Kank1	0.424032	0.00139684
1493	Rps11	0.448278	0.000675331		1493	Slc24a2	0.423981	0.00139888
1494	Gm13470	0.448191	0.000677154		1494	Dok5	-0.423841	0.00140457
1495	Otud4	0.44818	0.0006774		1495	Fnip2	-0.423812	0.00140573
1496	Polr3k	0.448171	0.000677577		1496	Ccdc174	0.423385	0.00142316
1497	Mast3	0.448166	0.0006777		1497	Pak4	0.42336	0.00142419
1498	Sptbn1	0.448126	0.000678527		1498	Sgta	0.423316	0.00142598
1499	Erlin2	0.447923	0.000682827		1499	Stard4	0.423269	0.0014279
1500	Hacd2	-0.447581	0.000690122		1500	Ttll3	0.422965	0.00144048
1501	Gns	-0.447036	0.000701872		1501	2810429I04Rik	-0.422716	0.00145085
1502	Syt12	0.44681	0.000706805		1502	Mnd1-ps	0.422575	0.00145674
1503	Rps24-ps3	0.44624	0.00071937		1503	Sertad3	0.422241	0.00147078
1504	Cryaa	0.446207	0.000720114		1504	Gm17786	0.42221	0.00147208
1505	Ggt5	0.446202	0.000720211		1505	Spag6	0.422003	0.00148088
1506	Ap3s1-ps1	0.446098	0.000722545		1506	Mrpl4	0.421903	0.00148514
1507	Eif2b4	-0.446027	0.000724114		1507	Btbd17	0.421674	0.0014949
1508	Rgs9	0.445951	0.000725819		1508	1700056E22Rik	0.421523	0.00150138
1509	Ptbp3	0.445598	0.000733764		1509	Mier1	-0.421386	0.00150733
1510	Sbf2	0.445566	0.000734484		1510	Rnf26	0.421184	0.00151607
1511	Msrb3	-0.44556	0.000734625		1511	Ift20	0.421089	0.00152018
1512	Dcaf15	0.445531	0.000735282		1512	Clp1	0.421048	0.00152198
1513	Lcat	-0.445331	0.00073983		1513	Rpl3l	0.420969	0.00152542
1514	St8sia6	0.445143	0.000744138		1514	Zfp326	-0.420922	0.00152745
1515	2610001J05Rik	0.444933	0.000748949		1515	Dmgdh	-0.420898	0.00152853
1516	Rnpc3	0.444811	0.000751769		1516	Usp39	0.420782	0.00153358
1517	Zhx1	0.444782	0.00075245		1517	Suds3	0.420772	0.00153403
1518	Rps12	0.44478	0.000752504		1518	Wnk4	0.420728	0.00153596
1519	Klf8	0.444673	0.000754972		1519	Parp3	0.420588	0.00154214
1520	Rbis	0.444364	0.000762173		1520	Kdm2a	0.420517	0.00154526
1521	Gm14681	0.444156	0.000767073		1521	Scamp5	0.420352	0.00155258
1522	Commd2	0.444122	0.000767864		1522	Paip2b	0.420164	0.00156093
1523	Usp35	-0.443912	0.000772841		1523	Mvb12b	0.419937	0.00157108
1524	Glrx2	-0.443901	0.000773086		1524	Gm8098	0.419897	0.00157285
1525	Gm21846	0.4438	0.000775478		1525	Gm17212	0.419854	0.00157479
1526	Jakmip1	0.443757	0.000776507		1526	Ddhd2	-0.419787	0.0015778
1527	Sprr1a	0.443608	0.000780071		1527	Csnk1g2	0.419639	0.00158447
1528	Zfp91	-0.44353	0.000781944		1528	Heatr6	-0.419591	0.00158663
1529	Haus7	0.443226	0.000789255		1529	Gramd1a	0.419528	0.00158951
1530	Carmil1	0.443214	0.000789551		1530	Dipk2a	0.419315	0.00159918
1531	Asnsd1	0.443182	0.000790323		1531	Serp2	0.419131	0.00160757
1532	Srsf6	0.443065	0.000793146		1532	Imp3	0.418927	0.00161694
1533	Hbegf	0.443051	0.000793488		1533	Eef2kmt	0.418915	0.00161746
1534	Cers5	0.443012	0.000794433		1534	Panx2	0.418874	0.00161937
1535	Rassf7	0.442717	0.000801643		1535	Cfap300	0.418631	0.0016306
1536	Pcm1	0.442643	0.000803445		1536	Gfpt1	-0.418616	0.0016313
1537	Tmem130	0.442616	0.000804114		1537	Me2	0.418231	0.00164922
1538	Flnb	0.442498	0.000807025		1538	Inhba	0.4178	0.00166949
1539	mt-Ti	0.442471	0.000807677		1539	Rhot1	0.41775	0.00167188
1540	Npy	0.442213	0.000814068		1540	Rab8b	-0.417642	0.001677
1541	Mtmr1	0.442186	0.000814753		1541	Tra2b	-0.417545	0.00168162
1542	Zfp703	-0.441968	0.000820174		1542	A330017A19Rik	0.417471	0.00168512
1543	Tmx3	-0.441683	0.000827343		1543	Fuca2	0.417162	0.00169993
1544	Fancl	0.441643	0.000828361		1544	Gm10605	0.417138	0.00170107
1545	Apoo	-0.441082	0.000842614		1545	F8a	0.417079	0.00170393
1546	Ppp3r2	0.441044	0.000843593		1546	Gm14127	0.416987	0.00170835
1547	Patz1	0.441024	0.000844112		1547	Glrx3	0.416958	0.00170977
1548	Casp7	0.440803	0.000849799		1548	Rapgef2	-0.416914	0.00171188
1549	Slc35f2	0.440595	0.000855187		1549	L3mbtl4	0.416881	0.00171351
1550	Wwp1	-0.440313	0.000862548		1550	Poldip2	0.416837	0.00171561
1551	Fam220a	0.440181	0.000866008		1551	Mrpl53	0.416734	0.00172061
1552	Lingo4	-0.440166	0.000866388		1552	Rbm19	0.416721	0.00172127
1553	Nectin2	0.440089	0.000868409		1553	Gin1	0.416298	0.00174191
1554	Map7d1	-0.439837	0.000875092		1554	Rps2-ps9	0.416284	0.00174264
1555	Naa38	0.439544	0.000882878		1555	Ccar1	-0.416186	0.00174744
1556	Arl5a	0.439336	0.000888463		1556	Top3b	0.415836	0.00176476
1557	Gtf2h4	-0.439277	0.000890051		1557	Zfp729a	0.41537	0.00178806
1558	Zfp354c	0.439253	0.000890695		1558	Ap5b1	0.415363	0.00178841
1559	Gm12163	-0.438989	0.000897835		1559	Tk1	0.415283	0.00179247
1560	Tox2	-0.438938	0.000899213		1560	Dqx1	0.415091	0.00180215
1561	Gm13998	0.438518	0.000910699		1561	Ubc	0.415064	0.00180355
1562	Pacs2	-0.438302	0.000916635		1562	D930030I03Rik	0.414978	0.00180787
1563	Ppp2cb	0.437982	0.000925529		1563	Rnf138	-0.414785	0.0018177
1564	Sike1	-0.437943	0.000926624		1564	Galnt9	0.414722	0.00182094
1565	Aamdc	-0.437938	0.000926748		1565	Rab23	-0.414479	0.0018334
1566	Prkag2	0.437926	0.000927094		1566	Nme4	0.414454	0.0018347
1567	Mbtps1	-0.437273	0.000945512		1567	Psma7	0.414039	0.00185615
1568	Osbpl10	-0.437239	0.000946464		1568	Aip	0.413938	0.00186142
1569	Gm24507	0.43711	0.000950149		1569	Sez6l2	0.41385	0.00186602
1570	Brox	-0.436832	0.000958111		1570	Chmp7	0.413766	0.00187043
1571	Tnrc6a	-0.436795	0.000959174		1571	Traip	0.413686	0.0018746
1572	Shroom1	0.4366	0.0009648		1572	Rad9a	0.413364	0.0018916
1573	Gm5860	-0.436532	0.00096678		1573	Wipf1	0.413049	0.00190828
1574	Numa1	-0.436341	0.000972336		1574	Sesn1	-0.412865	0.00191815
1575	Cbx5	0.436265	0.000974551		1575	Ecsit	0.412743	0.0019247
1576	Sorbs2	0.436213	0.000976075		1576	Ilf2	-0.412558	0.00193462
1577	Hspa9	-0.435917	0.000984773		1577	Gm8492	0.412406	0.00194286
1578	Gpr180	0.435692	0.000991406		1578	Asb8	0.412103	0.00195933
1579	Epn3	-0.435575	0.000994886		1579	Git1	0.412076	0.00196081
1580	Tfr2	0.435539	0.000995956		1580	Egln2	0.411919	0.0019694
1581	Dok4	0.435382	0.00100064		1581	Tmem68	-0.41184	0.00197374
1582	Tenm1	0.435022	0.00101149		1582	Tmem123	0.411814	0.00197515
1583	Uqcrh	-0.434941	0.00101393		1583	Stard10	0.411779	0.00197709
1584	Gm15191	-0.434906	0.00101499		1584	Yju2	0.411737	0.00197939
1585	Zfp946	0.434901	0.00101514		1585	H2aj	0.411704	0.00198121
1586	Sh3gl3	0.434894	0.00101535		1586	Gm10123	-0.411653	0.00198401
1587	Sdr39u1	-0.434889	0.00101549		1587	Efcab7	0.41147	0.00199415
1588	Gm13017	-0.434615	0.00102384		1588	Gm7820	0.411381	0.00199907
1589	Scn2b	-0.434577	0.00102501		1589	Nbr1	-0.411371	0.00199965
1590	Prkg1	0.434547	0.0010259		1590	Galns	0.411336	0.00200159
1591	Srsf7	0.434438	0.00102926		1591	Ppm1j	0.411269	0.00200533
1592	Erp27	-0.434368	0.00103141		1592	Paqr3	0.41096	0.0020226
1593	Cab39	-0.43433	0.00103256		1593	Gm26638	0.410841	0.00202933
1594	H19	0.434223	0.00103588		1594	Wnk3	-0.410808	0.00203117
1595	Shc2	0.434065	0.00104075		1595	Hbq1a	0.410736	0.00203524
1596	Agap3	-0.433909	0.0010456		1596	Dnajb2	0.410675	0.00203867
1597	Tpp1	-0.433714	0.00105167		1597	Gorasp1	0.410511	0.00204796
1598	Ncoa2	0.433627	0.0010544		1598	Rab9	-0.410426	0.00205282
1599	Zfp868	0.433454	0.00105985		1599	Pde3b	-0.410307	0.00205958
1600	4930444P10Rik	0.433347	0.00106322		1600	Lama4	0.410291	0.00206049
1601	Arhgap25	0.432763	0.00108182		1601	Tssk6	0.40961	0.00209969
1602	Lta4h	-0.432622	0.00108635		1602	Ssr4	0.409579	0.00210151
1603	Oaz1	-0.432113	0.00110285		1603	Dhx35	-0.409481	0.00210721
1604	Zdhhc14	0.431905	0.00110967		1604	Mis18bp1	0.409297	0.00211795
1605	Gm26815	-0.431861	0.00111111		1605	Rnf185	0.409198	0.00212373
1606	Tmie	0.431648	0.00111813		1606	Rps13	0.409192	0.0021241
1607	Enpp6	-0.431559	0.00112108		1607	Ttpa	0.408975	0.00213684
1608	Kif5c	-0.431503	0.00112293		1608	Tpd52	-0.408974	0.00213691
1609	mt-Tn	0.431396	0.00112648		1609	St6gal1	0.408739	0.0021508
1610	Aftph	-0.4313	0.00112969		1610	Prpf8	0.408731	0.00215126
1611	Gm12715	0.431272	0.00113062		1611	Tmem178	0.408727	0.00215149
1612	Gm15495	0.430936	0.00114188		1612	E130317F20Rik	0.408509	0.0021645
1613	Dlx3	0.430836	0.00114525		1613	Plcd3	0.408488	0.0021657
1614	Stradb	0.430819	0.00114584		1614	Ewsr1	-0.408244	0.0021803
1615	Smpdl3a	-0.430748	0.00114823		1615	Snap47	0.408005	0.00219472
1616	Pycr2	-0.430667	0.00115099		1616	Snrpd3	0.407934	0.00219903
1617	Tecrl	0.430665	0.00115104		1617	Smg5	0.407912	0.00220032
1618	Smad9	-0.430587	0.0011537		1618	Lcorl	-0.407875	0.00220258
1619	Fktn	0.430283	0.00116409		1619	2210016L21Rik	0.407599	0.00221936
1620	Asah2	-0.430086	0.00117085		1620	2410004I01Rik	0.407582	0.00222042
1621	Rps20	0.430015	0.00117328		1621	9330161L09Rik	0.406853	0.00226529
1622	2410006H16Rik	0.429719	0.00118353		1622	Cntnap2	0.406311	0.00229918
1623	Ndufaf7	-0.429546	0.00118958		1623	Mir1191	0.405992	0.00231934
1624	Iftap	-0.429347	0.00119655		1624	Prg4	-0.405343	0.00236076
1625	Dscam	-0.429302	0.00119811		1625	Gtpbp3	0.404906	0.00238909
1626	Mir129-1	-0.429199	0.00120177		1626	Gm11637	0.404842	0.00239326
1627	Fam136a	0.429195	0.00120191		1627	Ulk1	0.404795	0.00239633
1628	Srgap2	0.429182	0.00120236		1628	Ints7	-0.404782	0.00239716
1629	Eno4	-0.429124	0.00120442		1629	Faim	-0.404687	0.00240339
1630	C1qtnf2	0.429056	0.00120679		1630	Tbp	-0.404662	0.00240506
1631	Lrrc4	-0.428649	0.00122129		1631	Emp1	0.404583	0.00241023
1632	Gm7281	0.428301	0.00123381		1632	Cers4	0.404553	0.00241216
1633	Kbtbd2	-0.427649	0.00125752		1633	Tatdn2	0.404502	0.00241552
1634	Unc80	-0.427556	0.00126094		1634	Ralgps1	-0.404211	0.00243472
1635	Phex	-0.427215	0.00127357		1635	Nrm	0.404149	0.00243882
1636	Ahcyl1	-0.427161	0.00127558		1636	Ccdc158	0.403805	0.00246172
1637	Tardbp	-0.426779	0.00128987		1637	Gm6368	0.403804	0.00246179
1638	Fdxr	-0.426613	0.00129608		1638	Spire2	0.403627	0.00247366
1639	Rfc3	0.426511	0.00129996		1639	Naa10	0.403571	0.00247741
1640	Ppt2	-0.426286	0.00130851		1640	RP23-296I6.5	0.403534	0.00247994
1641	Uap1l1	-0.426196	0.00131193		1641	Ppil6	0.403409	0.00248837
1642	Cggbp1	0.426151	0.00131364		1642	Sigmar1	0.403237	0.00250003
1643	Stxbp2	0.425884	0.00132387		1643	Metap2	-0.403209	0.0025019
1644	Atp4a	0.425867	0.00132452		1644	Irf8	0.402454	0.00255357
1645	Ak2	0.425807	0.00132683		1645	Dstyk	0.402432	0.0025551
1646	Wiz	0.425279	0.00134733		1646	Tmem35a	0.402365	0.00255973
1647	Gm1848	0.425232	0.00134914		1647	Tpd52l2	0.402246	0.002568
1648	Synj2bp	-0.425063	0.00135578		1648	Nova2	0.40224	0.00256842
1649	Gm11582	0.424798	0.00136621		1649	Gdap1l1	0.401994	0.00258554
1650	Mfsd6	-0.42475	0.00136812		1650	Cox10	0.401977	0.00258672
1651	Ascc3	0.424664	0.00137154		1651	Ppig	-0.401854	0.00259535
1652	Zfhx2	0.424561	0.00137562		1652	Kdsr	-0.401393	0.00262784
1653	Psd3	0.424194	0.0013903		1653	Babam2	0.401257	0.00263748
1654	Spred1	-0.424063	0.00139558		1654	Cracd	-0.401243	0.00263846
1655	Gm24455	0.42377	0.00140744		1655	Ppip5k2	-0.401167	0.00264385
1656	Prokr2	0.423551	0.00141636		1656	Tspan33	0.401162	0.00264423
1657	Fut7	-0.423518	0.00141771		1657	Gm1043	0.401015	0.00265474
1658	Camk1	0.423503	0.00141833		1658	Abca3	0.401011	0.00265502
1659	Akr1c13	0.423328	0.00142548		1659	Bax	0.400836	0.00266755
1660	Nipal2	-0.423007	0.00143873		1660	Smpd1	0.400715	0.00267621
1661	Itgav	-0.422661	0.00145315		1661	Spsb3	0.400644	0.00268135
1662	Lrrc59	0.422648	0.00145368		1662	Lgmn	0.400627	0.0026826
1663	Gm22769	0.422598	0.00145578		1663	Zfp386	0.400367	0.00270143
1664	Tmem214	0.422238	0.0014709		1664	Surf1	0.40028	0.00270776
1665	Acy3	-0.42223	0.00147124		1665	Psmc4	0.400138	0.0027181
1666	Gm12371	0.422035	0.00147951		1666	Lrrc14	0.400098	0.002721
1667	Macrod1	-0.421909	0.00148487		1667	Bspry	0.40008	0.00272231
1668	Cpxm1	0.421136	0.00151815		1668	Plbd1	0.400033	0.00272578
1669	Gm26780	0.421123	0.0015187		1669	Gm12736	0.399849	0.00273923
1670	Rps27a	0.42099	0.0015245		1670	Ell	0.399833	0.00274045
1671	Kbtbd3	-0.420901	0.00152838		1671	Tubgcp5	-0.399363	0.00277518
1672	Ccdc93	-0.420792	0.00153316		1672	mmu-mir-7067	0.39935	0.00277613
1673	Gm26848	0.420723	0.00153621		1673	Ogt	-0.399347	0.00277637
1674	Lrrfip2	-0.420525	0.00154492		1674	Nlrx1	0.399291	0.00278056
1675	Pdzrn3	0.4203	0.00155489		1675	Noct	-0.399253	0.00278337
1676	Slc29a4	-0.420218	0.00155853		1676	Gon7	-0.399222	0.00278572
1677	Bag5	-0.419657	0.00158368		1677	Atn1	0.399182	0.0027887
1678	Trim35	0.419268	0.00160131		1678	Nkiras2	0.39873	0.00282261
1679	Rnf145	0.418925	0.00161701		1679	Ggcx	-0.398378	0.00284933
1680	Map6d1	-0.418741	0.00162551		1680	Fan1	0.398355	0.00285107
1681	Qrsl1	-0.418138	0.00165355		1681	Mecp2	-0.398331	0.00285293
1682	Adcy8	-0.418069	0.00165683		1682	4930513N10Rik	0.398302	0.00285509
1683	Vwc2	-0.418038	0.00165828		1683	Ppme1	0.398032	0.00287573
1684	Chmp2b	0.418005	0.00165981		1684	Crhr1	0.397988	0.00287916
1685	Galnt7	0.417949	0.00166245		1685	Gucy1a2	0.397798	0.00289376
1686	Septin8	-0.417873	0.00166602		1686	Tmem128	0.397784	0.00289487
1687	Grhpr	-0.417486	0.00168442		1687	Zcchc8	-0.397706	0.00290091
1688	Gtf2f1	-0.417395	0.00168875		1688	Recql5	0.397343	0.00292912
1689	Pmch	0.417001	0.00170771		1689	Mbtps2	-0.397179	0.00294193
1690	Dnmt1	0.416808	0.00171703		1690	Cchcr1	0.396979	0.00295763
1691	H2-DMa	0.416455	0.00173424		1691	Sorbs1	0.39659	0.00298837
1692	Eif4e	0.416307	0.00174147		1692	Ptgr1	0.396498	0.00299569
1693	Zfp641	0.416251	0.00174423		1693	Nkiras1	0.396206	0.00301896
1694	Rgl1	-0.41601	0.00175616		1694	mmu-mir-6398	0.396129	0.00302519
1695	Tor2a	0.415657	0.0017737		1695	Trak1	0.395999	0.00303562
1696	Snord64	0.415402	0.00178648		1696	2510039O18Rik	0.395941	0.00304032
1697	Rrp12	-0.415249	0.00179415		1697	Bbs5	-0.395884	0.00304492
1698	Chst7	0.415151	0.00179914		1698	1110019D14Rik	0.395795	0.00305207
1699	Pkdcc	-0.414915	0.00181108		1699	Shmt1	0.395761	0.00305487
1700	Gm15422	0.414758	0.00181908		1700	Polr3g	0.395738	0.00305671
1701	Neurl1b	0.414545	0.00183001		1701	Cic	0.395724	0.00305779
1702	Vti1b	0.414248	0.00184533		1702	Brsk1	0.395632	0.0030653
1703	Man2a2	0.41393	0.00186186		1703	Gm11235	0.395445	0.00308054
1704	Vegfa	-0.413792	0.00186907		1704	Kbtbd7	-0.395257	0.00309592
1705	Kank2	0.413752	0.00187114		1705	Lgals8	0.395168	0.00310317
1706	Inha	-0.413604	0.0018789		1706	Gm13525	0.394853	0.00312914
1707	Fmnl2	0.413401	0.00188964		1707	Hs3st3a1	0.394744	0.00313821
1708	Arfgef3	0.41309	0.00190612		1708	Hspd1	0.394665	0.00314471
1709	Drd5	-0.412959	0.0019131		1709	Ppid	-0.394662	0.00314496
1710	Ttc39c	-0.41282	0.00192052		1710	Leng9	0.394475	0.00316052
1711	Bend6	-0.412654	0.00192948		1711	Rassf5	0.3942	0.0031836
1712	Cited1	0.412613	0.00193169		1712	Gm12367	0.39415	0.00318778
1713	Stag1	0.41254	0.00193558		1713	Csnk2a2	0.39414	0.00318864
1714	Opa1	-0.412467	0.00193953		1714	Clec16a	0.393805	0.00321692
1715	Tmed2	0.412337	0.00194661		1715	Dbnl	0.393752	0.00322138
1716	Mtcl1	0.412149	0.00195684		1716	Cutc	0.393716	0.00322448
1717	Gm14696	0.411835	0.00197401		1717	Pole2	0.393411	0.00325048
1718	Cdkl2	0.411813	0.00197524		1718	Rexo1	0.393383	0.00325287
1719	Pon3	-0.411762	0.00197802		1719	Dimt1	-0.393368	0.00325417
1720	Zmynd8	-0.411713	0.00198071		1720	Gm15531	0.393241	0.00326503
1721	Spock3	0.41154	0.00199027		1721	Dazap1	0.393223	0.0032666
1722	Ciao3	-0.411445	0.00199555		1722	Plekhd1os	0.393202	0.0032684
1723	Rom1	-0.411104	0.00201452		1723	Slc25a13	0.393187	0.00326963
1724	Zfand2a	-0.410986	0.00202115		1724	Zfp184	-0.393035	0.00328274
1725	Gm26644	-0.410873	0.00202749		1725	Sidt2	0.39288	0.00329613
1726	2900060B14Rik	0.410756	0.00203409		1726	Gm26783	0.392636	0.00331739
1727	Smpd2	0.410705	0.00203699		1727	Gm16493	0.39262	0.00331875
1728	Pcdhga9	0.410679	0.00203843		1728	Ano8	0.392414	0.00333674
1729	Adar	-0.410505	0.00204828		1729	Mmp28	0.392392	0.00333862
1730	Ywhab	0.410408	0.00205381		1730	Supt20	-0.392348	0.00334253
1731	Rab11fip3	-0.410157	0.00206814		1731	Ddhd1	0.392315	0.0033454
1732	Msantd4	-0.410079	0.0020726		1732	Gm6612	0.392278	0.00334863
1733	H3f3a	0.409937	0.00208077		1733	Arrdc2	0.392256	0.00335058
1734	Urgcp	-0.409893	0.00208333		1734	Gpr68	0.392196	0.00335586
1735	Gm13588	0.409682	0.00209552		1735	Lig3	0.392109	0.00336357
1736	Gpr85	0.409649	0.00209741		1736	Id1	0.391985	0.00337451
1737	Gm19705	0.409554	0.00210292		1737	Abcg4	0.391919	0.0033803
1738	0610040F04Rik	-0.409462	0.00210831		1738	Lrpap1	0.391691	0.00340059
1739	Cnst	0.409169	0.00212544		1739	Mrpl15	-0.391605	0.00340822
1740	Marchf9	0.409079	0.00213073		1740	Mettl24	0.391527	0.00341519
1741	Lrp8	0.408956	0.00213796		1741	Hrob	0.39146	0.00342118
1742	Gpr26	0.408944	0.00213868		1742	Tbc1d2b	0.391323	0.00343352
1743	Camkk2	0.408616	0.00215811		1743	Mir153	0.391308	0.00343487
1744	Exosc8	0.408496	0.00216527		1744	Fdft1	0.391239	0.00344099
1745	Nus1	0.408269	0.00217885		1745	Ccdc137	0.390948	0.00346728
1746	Prpf6	-0.408145	0.00218626		1746	Armh3	0.390939	0.00346812
1747	Eif3l	0.408087	0.00218978		1747	Gm10638	0.39087	0.00347437
1748	Hunk	0.407927	0.00219942		1748	Gnb2	0.390697	0.00349009
1749	Dmkn	0.407737	0.00221096		1749	Alpl	0.390692	0.00349054
1750	B230369F24Rik	-0.407643	0.0022167		1750	Gpr108	0.390674	0.00349218
1751	Trim72	-0.407505	0.00222511		1751	Rpl38-ps1	0.390511	0.00350705
1752	Eif5	-0.407285	0.00223855		1752	BC064078	0.39024	0.00353196
1753	Rps8	0.407109	0.0022494		1753	Olfr155	0.389917	0.0035618
1754	Emid1	0.406945	0.00225956		1754	Dync2li1	-0.389888	0.00356452
1755	H2-M5	0.406905	0.00226204		1755	Actl6a	0.389851	0.00356795
1756	Armc8	0.406881	0.00226351		1756	Traf3ip2	0.389751	0.00357717
1757	Twist2	0.40683	0.00226668		1757	Slc39a1	-0.389577	0.00359342
1758	Otop2	0.406824	0.00226709		1758	Hacl1	0.389303	0.00361915
1759	Zmym3	0.406579	0.00228236		1759	Ppox	0.389231	0.0036259
1760	Col25a1	0.406563	0.00228335		1760	Suz12	-0.389203	0.00362851
1761	Trib3	0.406456	0.00229006		1761	Gm7763	0.389138	0.0036347
1762	Asf1b	0.40586	0.00232769		1762	Cyp4x1os	0.389071	0.00364098
1763	Ube2q2	-0.405836	0.0023292		1763	Mbd3	0.388929	0.00365451
1764	Pdzd4	0.405416	0.00235609		1764	Thumpd3	-0.388891	0.0036581
1765	Napg	-0.405315	0.00236262		1765	A830039N20Rik	-0.388438	0.00370128
1766	Lactb2	-0.405143	0.00237373		1766	Kdm4c	-0.388414	0.00370366
1767	Acta1	0.405109	0.0023759		1767	A730081D07Rik	0.388267	0.00371778
1768	Mau2	-0.405095	0.00237682		1768	Gm12353	0.388167	0.00372736
1769	Ppif	-0.405035	0.00238071		1769	Plxnb2	-0.388158	0.00372825
1770	Nicn1	0.404919	0.00238823		1770	Maz	0.388076	0.00373622
1771	Foxred1	-0.404909	0.00238891		1771	Gm23986	0.387951	0.00374828
1772	Ccdc106	0.404841	0.00239336		1772	Os9	0.387781	0.00376484
1773	Smyd5	0.404808	0.0023955		1773	Ccnb1	0.387765	0.00376638
1774	Lmtk3	-0.404755	0.00239892		1774	Trim28	0.38765	0.00377759
1775	Msrb2	-0.404597	0.00240927		1775	Ube2g1	-0.387544	0.003788
1776	Fjx1	0.404483	0.0024168		1776	Pcnx3	0.387366	0.00380542
1777	Brsk2	-0.404468	0.00241775		1777	Ufsp1	0.387235	0.00381837
1778	Idnk	-0.404374	0.00242395		1778	1700025G04Rik	0.386981	0.00384345
1779	RP24-465O15.1	0.404292	0.00242939		1779	Plekhn1	0.386966	0.003845
1780	Styk1	0.403746	0.00246571		1780	Elavl3	0.386393	0.00390216
1781	Sla	0.403741	0.00246602		1781	Stk40	0.385942	0.00394771
1782	Herc1	0.403529	0.0024803		1782	Lrp3	0.385861	0.003956
1783	Far2	0.403526	0.00248046		1783	Ttll9	0.385829	0.00395929
1784	Acadm	0.403295	0.00249605		1784	Med31	-0.385564	0.00398631
1785	Postn	0.403191	0.0025031		1785	Gm14013	0.38554	0.00398872
1786	4930517E11Rik	0.403068	0.00251149		1786	Gm8100	0.385009	0.00404355
1787	Plpp5	0.402631	0.00254139		1787	Dag1	0.384849	0.00406009
1788	Supt5	-0.402594	0.00254394		1788	Lrfn4	0.38483	0.00406213
1789	Lrrc3b	0.402455	0.00255351		1789	Rep15	0.384752	0.00407029
1790	Map9	0.402358	0.00256022		1790	Clcn3	-0.384735	0.00407199
1791	Prmt6	-0.401915	0.00259106		1791	Ier2	0.384625	0.00408347
1792	Cgrrf1	-0.40171	0.00260543		1792	Tmod1	0.384143	0.00413417
1793	Tnrc6c	0.401372	0.0026293		1793	Rnd1	0.38388	0.00416214
1794	Homer1	0.401183	0.0026427		1794	Gm10010	0.383802	0.00417043
1795	Atf2	0.401077	0.00265031		1795	Ginm1	-0.383736	0.00417747
1796	Gm27015	0.401008	0.0026552		1796	Stx2	0.383526	0.00419992
1797	Gp1bb	0.400349	0.00270274		1797	Prkcsh	0.383478	0.00420506
1798	Ccn1	0.400324	0.00270456		1798	Nthl1	0.383423	0.004211
1799	Nkap	0.399744	0.00274699		1799	9430091E24Rik	0.383384	0.00421516
1800	Mrnip	0.39928	0.00278137		1800	Wdr24	0.383319	0.00422222
1801	Cmc2	-0.399214	0.00278631		1801	Slc12a4	0.383016	0.00425496
1802	Ccl7	0.399176	0.00278913		1802	Kif17	0.382909	0.00426657
1803	Igsf1	0.398867	0.00281232		1803	Mmp24	0.382892	0.00426837
1804	mt-Tr	0.398737	0.00282209		1804	Gm26316	0.382823	0.00427597
1805	Hexim1	-0.398717	0.00282364		1805	Wdr26	0.382813	0.00427698
1806	Pafah1b1	-0.398409	0.00284695		1806	9330171B17Rik	0.382731	0.00428596
1807	2310039H08Rik	0.39829	0.00285605		1807	Fam189a1	0.382504	0.00431084
1808	Tspoap1	-0.39809	0.00287135		1808	Frmd6	0.382483	0.00431307
1809	Mcee	0.397987	0.00287924		1809	Lcn2	0.382207	0.00434348
1810	B930095G15Rik	0.397905	0.00288551		1810	Fcf1	-0.382043	0.00436168
1811	Mkln1	0.397853	0.00288956		1811	Zfp280d	-0.382015	0.0043648
1812	Srsf5	0.397779	0.00289523		1812	Zfand6	-0.382004	0.00436604
1813	Tspan2os	0.397777	0.00289539		1813	4930451G09Rik	0.381969	0.00436993
1814	Gdpd2	0.397533	0.00291428		1814	Gm26935	0.381899	0.00437767
1815	Gm15166	0.397526	0.00291487		1815	Gm16617	0.381887	0.00437898
1816	Inf2	0.397513	0.00291588		1816	Rtraf	0.381816	0.00438691
1817	Anxa3	0.397416	0.00292342		1817	Mrpl43	0.38152	0.00442004
1818	Spag7	0.397324	0.0029306		1818	mmu-mir-6240	0.381462	0.00442649
1819	Vill	0.396932	0.00296129		1819	Gatad2b	0.381435	0.0044295
1820	Rlim	0.396845	0.00296816		1820	Larp6	0.381408	0.00443257
1821	Rpl31	0.39611	0.00302672		1821	Lonp2	-0.381341	0.00444015
1822	Taldo1	-0.396045	0.0030319		1822	Dtx1	0.381102	0.00446706
1823	Osbpl5	0.395908	0.00304293		1823	Sema3f	0.38107	0.00447071
1824	Fam131c	-0.39564	0.00306468		1824	Apol9a	0.381064	0.00447142
1825	Tmem200a	0.395504	0.00307568		1825	Ppp1r9b	0.380868	0.00449369
1826	Pak1ip1	-0.395407	0.0030836		1826	Gm5863	0.380858	0.00449479
1827	A930019D19Rik	-0.39519	0.00310138		1827	Slc39a10	-0.380724	0.00451014
1828	Mmel1	-0.39506	0.00311206		1828	As3mt	-0.380597	0.00452466
1829	Spty2d1	-0.395019	0.00311547		1829	Bmpr1b	0.380482	0.0045378
1830	Mms19	0.394992	0.00311765		1830	Gm11229	0.380446	0.00454191
1831	Gm26666	-0.394899	0.00312533		1831	Sh3gl2	0.380287	0.00456021
1832	Gm12017	-0.394803	0.00313328		1832	Erap1	0.379996	0.00459393
1833	Pih1d1	0.394764	0.00313653		1833	Btbd6	0.379642	0.00463509
1834	Vps16	-0.394713	0.00314073		1834	Serhl	0.379574	0.00464316
1835	Lmln	-0.39452	0.00315677		1835	Map1s	0.379536	0.00464759
1836	Gtf2e2	0.394118	0.00319046		1836	Tigd2	0.379503	0.00465141
1837	Gm12468	0.393955	0.00320422		1837	Sirt4	-0.379319	0.00467301
1838	Fhl2	0.39364	0.0032309		1838	Fbxl18	0.379266	0.00467927
1839	Gm14328	0.393604	0.00323399		1839	Dek	-0.379244	0.00468193
1840	Fut8	0.393244	0.00326481		1840	Acat2	0.379113	0.00469742
1841	Ube3c	-0.393214	0.00326733		1841	Ube2r2	0.37899	0.00471199
1842	Kcns2	0.393143	0.00327343		1842	Wasf3	0.378836	0.00473021
1843	Gsr	0.392894	0.00329491		1843	Psma5	0.378666	0.00475056
1844	Camsap1	0.392859	0.003298		1844	Fgf14	0.378468	0.00477432
1845	Cacna1b	0.392763	0.00330632		1845	Gm22897	0.378453	0.00477606
1846	Fam53c	0.392398	0.0033381		1846	Vegfb	0.37834	0.00478963
1847	Zdhhc20	-0.392323	0.00334471		1847	Mrps18a	0.378202	0.00480634
1848	Npy5r	-0.392245	0.00335154		1848	Pex14	0.377997	0.00483115
1849	Glud1	-0.392189	0.0033565		1849	Fcho2	-0.377971	0.00483427
1850	Kars	0.392076	0.00336643		1850	Rab3b	0.377834	0.00485096
1851	Ccdc159	-0.391773	0.00339326		1851	Rab40c	0.377685	0.00486908
1852	Arhgef6	-0.391389	0.00342759		1852	Gm25862	0.377277	0.00491913
1853	M6pr	-0.391142	0.00344976		1853	Acss1	0.377253	0.00492205
1854	Mettl7a1	-0.391038	0.00345915		1854	Tab1	0.377077	0.00494384
1855	Eea1	0.390672	0.00349236		1855	Gm11960	0.37705	0.00494719
1856	Mylk	-0.390524	0.00350585		1856	Gm12925	0.377038	0.00494862
1857	Kcnk9	-0.390517	0.00350656		1857	Dusp26	-0.3769	0.00496583
1858	Napepld	-0.389814	0.00357133		1858	Golt1b	-0.376799	0.00497832
1859	Vps35l	0.389791	0.00357353		1859	Ldah	0.376777	0.00498109
1860	Gm8609	-0.38956	0.00359505		1860	Tmem119	0.37654	0.00501067
1861	Mef2a	-0.38949	0.00360163		1861	Fam149b	-0.376472	0.00501922
1862	Nutf2	0.389452	0.00360514		1862	Lats1	-0.37625	0.0050471
1863	Smim4	-0.389396	0.00361044		1863	Tbc1d23	-0.376209	0.00505236
1864	Ypel1	0.389319	0.00361764		1864	Wdr54	0.376177	0.0050563
1865	Gldc	0.389264	0.00362283		1865	Etfa	-0.376001	0.00507867
1866	Sstr3	-0.389226	0.00362638		1866	Prkab2	0.375925	0.00508832
1867	Igfbp3	0.389076	0.0036405		1867	Gm16755	0.37567	0.00512075
1868	Fam155a	-0.389056	0.00364247		1868	Mrpl1	-0.37553	0.00513862
1869	Gle1	0.388783	0.00366832		1869	A730060N03Rik	0.375512	0.00514099
1870	Sbno2	0.388695	0.00367676		1870	Rpl19-ps11	0.375189	0.00518243
1871	Camk2d	0.388547	0.00369085		1871	Glod4	-0.375121	0.00519124
1872	Phtf2	0.388537	0.00369182		1872	Ufl1	-0.374874	0.00522326
1873	Slc37a1	0.388433	0.00370184		1873	Mtmr6	-0.374728	0.00524227
1874	Rad52	0.388264	0.00371802		1874	Rad51	0.374665	0.00525046
1875	Sertm1	0.388188	0.00372538		1875	Arid4b	-0.374398	0.00528544
1876	Zbtb1	-0.388149	0.00372914		1876	Gm15265	0.374386	0.00528692
1877	A330040F15Rik	0.38782	0.00376103		1877	Rps29	0.374345	0.00529231
1878	Zbtb10	0.387585	0.00378396		1878	Crygn	0.374334	0.00529379
1879	Carf	-0.387123	0.00382939		1879	Hars2	-0.374305	0.00529766
1880	Pcx	-0.387123	0.00382941		1880	Tent2	-0.374274	0.0053017
1881	Il4	0.3868	0.00386144		1881	Dap3	0.374226	0.00530801
1882	Qser1	0.386693	0.00387207		1882	Ythdf3	-0.374088	0.00532617
1883	Aym1	0.386641	0.00387733		1883	Stim2	0.373991	0.00533908
1884	Unc119	0.386488	0.0038926		1884	Pja2	0.373897	0.00535154
1885	Gabra3	0.386412	0.00390028		1885	Gm11224	0.37386	0.00535643
1886	Esyt2	0.386304	0.00391111		1886	Naa80	0.373312	0.00542957
1887	Ccna2	0.385743	0.00396804		1887	Map3k12	-0.373234	0.00544007
1888	Ifrd1	-0.385296	0.00401379		1888	Dedd2	0.373214	0.00544283
1889	Gm7204	0.385071	0.00403712		1889	Cpped1	0.373132	0.00545393
1890	1110059E24Rik	0.385011	0.0040433		1890	Dkk2	0.37297	0.00547572
1891	Tmem243	-0.384939	0.00405073		1891	Gm9727	0.372848	0.00549231
1892	Gm15796	0.384883	0.00405657		1892	Exoc3l	0.372825	0.00549546
1893	Rpl3	0.384652	0.00408067		1893	Zfp39	-0.372317	0.00556478
1894	Rpf2	0.384543	0.00409212		1894	Trim33	-0.372307	0.00556623
1895	Mfsd12	-0.384496	0.00409707		1895	Prss36	0.372175	0.00558433
1896	Ndufb4	-0.384426	0.00410443		1896	Hbq1b	0.372061	0.00560012
1897	Phldb2	0.384245	0.00412347		1897	Fbxo44	0.37165	0.00565705
1898	0610025J13Rik	-0.384106	0.00413813		1898	Mzt1	-0.371604	0.00566348
1899	Pitpnm2	0.383887	0.00416141		1899	Bnc2	0.371452	0.00568474
1900	Dhtkd1	0.383718	0.0041794		1900	Stx5a	0.371379	0.0056949
1901	Hoga1	0.383682	0.00418324		1901	Asrgl1	0.371344	0.00569982
1902	Gm15627	-0.383489	0.00420393		1902	Cdc42bpa	0.371341	0.00570024
1903	Sri	0.383386	0.00421501		1903	Slc25a23	0.371291	0.00570723
1904	Arsb	-0.383265	0.00422805		1904	Plekhm2	0.371064	0.00573916
1905	Atp6v1d	-0.382833	0.0042748		1905	Ppp1r16b	-0.371033	0.00574357
1906	Dipk1c	-0.382385	0.00432388		1906	Tbc1d17	0.370811	0.00577502
1907	Hsd11b1	-0.382312	0.00433198		1907	D17H6S56E-5	0.370409	0.00583226
1908	Prr3	0.382233	0.00434063		1908	Polr2l	0.370359	0.00583938
1909	Megf8	-0.382202	0.00434407		1909	Eif4g3	0.370349	0.00584091
1910	Nap1l2	-0.38218	0.00434649		1910	Il23a	0.370326	0.00584409
1911	Abi1	0.38212	0.0043531		1911	Rab8a	-0.370321	0.00584489
1912	Cpne4	0.382076	0.00435803		1912	Gm22205	0.370312	0.00584615
1913	Mpv17	0.381634	0.00440728		1913	Ndufab1-ps	-0.370287	0.0058498
1914	Dmwd	0.381544	0.00441736		1914	Gm10687	0.370275	0.00585146
1915	Arhgef10l	-0.381457	0.00442712		1915	Crybb1	0.370163	0.00586754
1916	Nhsl2	0.381421	0.00443115		1916	Mindy4	0.370093	0.00587767
1917	Serpina9	-0.381324	0.00444206		1917	Tm2d1	-0.369864	0.00591071
1918	Aanat	-0.381301	0.00444459		1918	Cbr3	0.369825	0.00591633
1919	Bcl9	0.381266	0.00444854		1919	Tpm2	0.369489	0.00596528
1920	Rpp25	-0.381036	0.00447453		1920	Tnmd	0.369371	0.00598248
1921	Lrfn5	0.380956	0.0044837		1921	Pkp4	0.36934	0.00598702
1922	Zfas1	0.380943	0.00448518		1922	Bnip2	-0.36929	0.00599429
1923	Snhg18	0.380334	0.00455487		1923	Fbxo8	-0.369169	0.00601199
1924	Brd3	0.380244	0.00456521		1924	Gins3	0.368864	0.00605709
1925	Nmbr	0.380084	0.00458375		1925	Pabpn1	0.368839	0.00606065
1926	Osgin2	0.379989	0.00459472		1926	Pemt	0.368528	0.00610689
1927	Btbd11	-0.379938	0.00460064		1927	Gm26823	-0.368503	0.00611061
1928	Prmt7	0.379522	0.00464922		1928	Hook2	-0.36844	0.00611998
1929	Pik3ca	-0.379237	0.00468272		1929	Cfp	0.368391	0.00612728
1930	Shisa8	-0.379192	0.00468799		1930	Plscr3	0.368343	0.0061345
1931	Gm5637	0.379108	0.00469796		1931	Eif3d	0.368187	0.00615789
1932	Dazap2	-0.379034	0.00470671		1932	Gpt2	0.368171	0.00616027
1933	Cstb	-0.378834	0.00473047		1933	Gpam	0.36814	0.00616495
1934	Cenpc1	0.378801	0.00473438		1934	Jam2	0.368058	0.0061773
1935	Olfr1260	0.378458	0.00477544		1935	Arid1a	-0.367729	0.00622699
1936	Eif3f	0.378146	0.00481308		1936	Tasor	-0.367679	0.00623446
1937	Eif3k	0.377792	0.00485602		1937	Rpl10a	-0.367257	0.00629878
1938	Eif3s6-ps2	0.377693	0.00486813		1938	Maneal	0.367209	0.00630613
1939	Arl4d	-0.37762	0.00487703		1939	Myo1a	0.367189	0.00630917
1940	Tox3	0.37748	0.00489419		1940	Mindy2	-0.367165	0.00631292
1941	Gm13005	0.377464	0.00489611		1941	Tedc2	0.366825	0.00636523
1942	Ergic3	0.377291	0.00491744		1942	Rab33a	0.366819	0.00636617
1943	Fam32a	0.377153	0.00493443		1943	Gm5177	0.366801	0.00636892
1944	Igsf10	0.377065	0.00494539		1944	Pip4p1	0.366731	0.00637981
1945	Coro2a	0.377033	0.00494933		1945	Grid1	0.366728	0.00638019
1946	Psmg1	0.376842	0.00497295		1946	Zfp248	-0.366663	0.00639022
1947	Tdg-ps2	0.37682	0.0049758		1947	Mrps23	0.366469	0.00642035
1948	Rtn4	0.376709	0.0049896		1948	Lzts3	-0.366345	0.00643978
1949	Snap29	0.376607	0.00500228		1949	Tvp23bos	0.366284	0.00644921
1950	Sybu	0.37651	0.00501446		1950	Gm20517	0.366168	0.00646738
1951	Chmp5	-0.37645	0.00502205		1951	Vsig10	0.366119	0.0064751
1952	Txndc9	0.376217	0.00505125		1952	Mas1	0.365734	0.00653562
1953	Lor	0.376109	0.00506496		1953	Pidd1	0.365537	0.00656684
1954	3830406C13Rik	-0.375959	0.00508393		1954	Hey2	0.36551	0.0065712
1955	Mrvi1	-0.375782	0.00510644		1955	Rnf8	0.365377	0.00659234
1956	Pus1	-0.37572	0.00511441		1956	Cyhr1	0.365341	0.00659803
1957	Gng11	-0.375711	0.00511551		1957	Brat1	0.365302	0.00660432
1958	5530401A14Rik	0.375524	0.00513942		1958	Rc3h1	-0.365237	0.00661468
1959	5430416N02Rik	0.375427	0.00515184		1959	Vkorc1l1	0.365139	0.00663023
1960	Col6a1	0.37541	0.00515405		1960	E230029C05Rik	0.365122	0.00663308
1961	Naa16	-0.375297	0.00516854		1961	Atxn2l	0.365115	0.00663411
1962	Leng1	-0.375251	0.00517441		1962	Pstk	-0.365007	0.00665149
1963	4933421O10Rik	-0.375109	0.0051928		1963	Slc12a6	0.364962	0.00665873
1964	Mosmo	-0.374766	0.00523728		1964	Cep70	-0.3648	0.00668467
1965	Snhg7	0.374682	0.00524829		1965	Prkcq	0.364689	0.00670265
1966	Gabbr2	0.374307	0.0052973		1966	Stmn3	0.364305	0.00676498
1967	Nol12	0.374207	0.00531046		1967	Pdcd10	-0.363951	0.00682275
1968	Tmem183a	0.374017	0.00533562		1968	Rnf139	-0.363856	0.00683843
1969	Dbf4	0.373971	0.00534174		1969	Zfp119a	0.363741	0.00685732
1970	Emp3	0.373727	0.0053741		1970	Gm16162	0.363513	0.00689509
1971	Eif5b	0.373645	0.005385		1971	Evi2a	0.363435	0.00690803
1972	Mxra7	0.373627	0.00538747		1972	Cfap298	0.363391	0.0069153
1973	Prss56	0.373533	0.00540002		1973	Gm17732	0.363315	0.00692782
1974	Grem2	-0.373493	0.00540535		1974	RP23-296I6.3	0.363211	0.00694518
1975	Ccdc142os	-0.373486	0.00540626		1975	Arhgef19	0.362932	0.00699187
1976	Srrm3	-0.373147	0.00545178		1976	D330050G23Rik	0.362729	0.00702594
1977	1700012C14Rik	0.373112	0.00545657		1977	Rrs1	0.362694	0.00703182
1978	Cldnd1	0.372959	0.00547718		1978	2310002F09Rik	0.36269	0.00703253
1979	Dapk2	-0.372926	0.00548172		1979	Nemf	-0.362634	0.00704192
1980	Rps6ka3	0.372612	0.00552439		1980	Stat6	0.362613	0.00704549
1981	Kctd8	0.372355	0.0055596		1981	Tcta	0.362575	0.00705182
1982	Trmt1l	-0.372345	0.00556092		1982	Gm14403	0.362572	0.00705237
1983	Dennd3	0.371724	0.00564681		1983	Rhof	0.362485	0.00706716
1984	Nfe2l3	0.371709	0.00564884		1984	Ubtf	0.362412	0.00707948
1985	Gm15506	-0.371586	0.00566599		1985	Fbrsl1	-0.362381	0.00708474
1986	Vps39	-0.371561	0.00566951		1986	Dancr	-0.362281	0.00710171
1987	Ankhd1	-0.371469	0.00568229		1987	Gm6498	0.362204	0.00711484
1988	Trim32	-0.371187	0.00572193		1988	Atp5b	0.36216	0.00712235
1989	6430548M08Rik	-0.371184	0.00572235		1989	Zfp551	0.362082	0.00713561
1990	Zhx3	-0.370996	0.00574884		1990	Ghdc	0.362043	0.00714232
1991	Orc3	0.370806	0.00577564		1991	Napa	0.361956	0.00715711
1992	Mafk	-0.369948	0.00589857		1992	Noxo1	0.361899	0.00716687
1993	Crygs	-0.369864	0.00591075		1993	1700029I15Rik	0.361835	0.0071779
1994	Commd1	0.369796	0.00592058		1994	Ciao2a	-0.361823	0.0071799
1995	Sumo3	0.369587	0.00595099		1995	Capn7	-0.361612	0.00721614
1996	Mrpl47	-0.369045	0.00603033		1996	Eps15	-0.361466	0.00724138
1997	Rnf103	-0.368911	0.00605002		1997	Arhgap12	-0.361434	0.00724692
[truncated: 776 more rows]
