# Supplementary material for: LCM-seq reveals unique transcriptional adaptation mechanisms of resistant neurons and identifies protective pathways in spinal muscular atrophy
Source: Genome Res. 2020 Aug;30(8):1083–96. doi: 10.1101/gr.265017.120 (PMC7462070; doi:10.1101/gr.265017.120)
Supplement: Supplemental Material [file supp_gr.265017.120_Supplemental_Table_S5.xlsx]

## Sheet: Info
DESeq2, pairwise comparisons
Differentially expressed genes between SMA and control per cell type and time point
baseMean	Mean count over all samples
log2FoldChange	negative log2 fold changes indicate upregulated genes in SMA compared to control, positive log2 fold changes indicate downregulated genes in SMA compared to control
lfcMLE	unshrunken maximum likelihood estimate
lfcSE	Standard error
stat	Statistic
pvalue	P-value
padj	BH adjusted P- values, shown are genes < 0.05

## Sheet: RN_P2
	baseMean	log2FoldChange	lfcMLE	lfcSE	stat	pvalue	padj
Smn1	90.1091127741564	4.76886786808811	7.5915556717459	0.373515091237536	12.7675373230244	2.48905569444972e-37	5.24344472592778e-33
Gm26917	465.001103975632	-2.11858178417134	-2.54703376069972	0.316751980269649	-6.68845631957157	2.25536942293045e-11	2.37558061317264e-07
Dbpht2	60.8533263210158	2.38775218598677	3.49614938605773	0.390130795019261	6.12038889641841	9.33472509869341e-10	5.76844520661695e-06
Golt1b	547.364571936512	1.09763877848124	1.15195845871449	0.180092431517633	6.09486345001547	1.09530906799904e-09	5.76844520661695e-06
Crabp1	24.9805803725042	-2.36807897214391	-4.41531405948435	0.416892055975008	-5.68031685469649	1.34445444310543e-08	5.66445545969178e-05
Ubap1l	28.6430081914323	-2.31639683657457	-5.64037924104998	0.424631322084286	-5.45507765466905	4.89514481401098e-08	0.000171868534419926
Gad2	161.702288890741	-2.24985852617103	-4.6321416588252	0.423692944839216	-5.3101156240041	1.09555708611757e-07	0.000329700079659325
Igfbp7	19.87285118041	-2.2132430021427	-4.49659334353889	0.421506479631049	-5.25079235811508	1.51446323806345e-07	0.000398796032163057
Odf4	20.158501715683	-2.17445679645216	-4.28725138187311	0.420712199016093	-5.1685137762525	2.35962897861958e-07	0.000552310489595557
Cdh12	59.2743973001735	-2.12403922964593	-4.04788192817722	0.421264932650689	-5.0420508924895	4.60568749956215e-07	0.000970234128657763
Gm24336	21.501694656711	-2.10098218295062	-4.19068624947665	0.421788483882269	-4.98112742105365	6.32148969081702e-07	0.00117678601214222
Gtf3c4	124.81574555067	1.41881953265537	1.63108608427795	0.285490289317279	4.96976459706678	6.70342359522766e-07	0.00117678601214222
Tnc	36.9553618810897	-1.97995407627431	-3.17176512221197	0.406322015139934	-4.87286930685366	1.0998898838647e-06	0.00178232925334568
Olig2	54.3767579698268	-1.99691119858315	-3.48096444061855	0.416577809765558	-4.79360914520861	1.63807272700124e-06	0.00243970189540354
Orai1	76.3326908576492	-1.98776546878068	-3.42125397133877	0.415692567417967	-4.78181623772466	1.73718448832493e-06	0.00243970189540354
Dnah8	15.3478603724475	-2.01315659367008	-4.37713112719761	0.423888608343539	-4.74925854114607	2.04163797918829e-06	0.00253868056733201
Lct	38.8598751156801	-1.90155183799442	-2.91785232171709	0.400447956285334	-4.74856172480875	2.04868364400666e-06	0.00253868056733201
Gm21992	15.4829925008319	-2.00438442440756	-4.42469000059521	0.424241264994912	-4.72463333907794	2.30530915662983e-06	0.00269798014964244
Actr2	3696.39293412232	1.09319970647685	1.19024829053838	0.232496481923288	4.70200536985998	2.57618723324918e-06	0.00285631369766459
C330011M18Rik	17.286682691402	1.93145439450861	5.17655071854814	0.424008140937843	4.55522950629324	5.23284131883278e-06	0.00551175176112657
D730003I15Rik	13.1553793022973	1.90718806829651	4.76753447354769	0.424683403406206	4.49084671781324	7.09405923476888e-06	0.00711635484950673
Aga	34.9365343049781	-1.89328972192949	-3.69535818295188	0.42289918940422	-4.47692918162541	7.57243543896658e-06	0.00725095113442136
Smim1	37.6105654148549	-1.87567258579554	-5.44738859585454	0.422245436804235	-4.44213820282244	8.90693184844456e-06	0.00815797505736231
A930038B10Rik	13.2525150755024	-1.86702505109053	-4.18982203088222	0.42467476696633	-4.39636445656437	1.10079045958814e-05	0.0096621882590349
Enpp1	18.9057858902553	-1.8560580314111	-4.18303546284329	0.424826558836438	-4.36897833434585	1.24829148620878e-05	0.0105186033793897
L3mbtl1	77.0836957735006	-1.5517465911795	-2.01991591951561	0.357198009019958	-4.34421959807956	1.39771646024502e-05	0.0113247288275083
Syt4	23574.7267161755	1.05488325192753	1.16175732286916	0.245546509996252	4.29606290044044	1.73858270119512e-05	0.0135648085864357
Rbms2	18.3619995780904	-1.80758674556751	-4.98067349913004	0.423249154933173	-4.27073917218549	1.94826157772532e-05	0.0146578851415577
Susd6	85.8719123665947	1.50898050634299	1.96263917033681	0.357092470422769	4.22574159728564	2.38155155388476e-05	0.0170752912545312
Tctex1d2	342.692017066614	0.902172531288022	0.967944424107564	0.213736872423204	4.22094943684634	2.4327550536925e-05	0.0170752912545312
Arhgef9	173.22033370496	-1.41621942989781	-1.76075988359966	0.336286785627559	-4.21134427644828	2.53855520367244e-05	0.0170752912545312
Phxr4	16.4896062175323	-1.78101045985303	-3.559547013632	0.423396929557604	-4.20647939443953	2.59379720946073e-05	0.0170752912545312
Aurka	38.7062040409786	1.78027402006252	3.87053668451405	0.424852463506474	4.19033469964896	2.78543274384903e-05	0.0177811897520981
Klhl23	1076.51987469664	0.671933255536566	0.698025234064753	0.161188656154751	4.1686137943322	3.06457750384383e-05	0.0189877616752865
Fbn1	37.9048302731678	-1.75664058839867	-4.01982948472437	0.424793251049284	-4.13528365636597	3.54516462505321e-05	0.021337839426106
Adamts10	145.731186100796	-1.2570182888818	-1.48337557549535	0.304985087626014	-4.12157295514466	3.76294264246951e-05	0.0220194860295174
Gm17137	21.1738387198753	-1.73766481638528	-4.6557970665974	0.422909858045479	-4.10883024674827	3.97668236585674e-05	0.0223679423165282
B230216N24Rik	22.8271441610936	-1.72571775055095	-5.29686947940231	0.420345466633939	-4.10547487134862	4.03485145745785e-05	0.0223679423165282
Desi2	233.878219901286	-0.947962232162204	-1.03174090141029	0.232059900995089	-4.0849893846256	4.40788316968253e-05	0.0230806561516197
A730011C13Rik	12.4551455993937	-1.73327208346756	-4.39854027835454	0.424316508945332	-4.08485657976336	4.41040494163257e-05	0.0230806561516197
Meis2	55.7249347217241	-1.71389740046345	-5.0180565360913	0.420230397122769	-4.07847079173271	4.53328962709571e-05	0.0230806561516197
Cystm1	836.253041688746	0.839983140271826	0.89625059570403	0.206131430933556	4.07498815909635	4.60166884253312e-05	0.0230806561516197
Gm24514	45.0511934309841	-1.71381516196962	-3.2145086466976	0.421841078773795	-4.06270334541939	4.85076596911353e-05	0.0237642409082199
B3galnt1	729.457022260417	1.01355848886215	1.12116367723533	0.250196765305637	4.05104553459756	5.09892826387964e-05	0.0244122779106565
Zfp112	17.1234128397498	-1.68940286906653	-4.06412307789151	0.42446256104827	-3.98009865674446	6.88866737355315e-05	0.0322481481980601
Selenos	337.751730549379	1.32319537112808	1.63623165275335	0.333764116429787	3.96446264290498	7.35614650558057e-05	0.0331478981505391
Lars2	1586.68254286362	-1.30903918480202	-1.6082948420441	0.330299603199978	-3.96318727639969	7.39557207384097e-05	0.0331478981505391
2900026A02Rik	73.195632601448	-1.64177144866724	-2.76220991323217	0.41481462863214	-3.95784366159173	7.56294301418659e-05	0.0331918661535114
Erich3	59.5708693599865	-1.5831652041413	-2.46393724838186	0.404590048364572	-3.91301073899555	9.11524792786826e-05	0.0391881250711169
Obscn	14.0418447815586	-1.65763652451811	-3.63422257861627	0.424861099055128	-3.90159637633245	9.55604008290998e-05	0.0402615080773163
Cpm	15.6101873896038	-1.64839153875173	-4.10056405828482	0.424053125604738	-3.88722883813431	0.000101395156321979	0.0414443939238866
Dipk1c	31.4570162618958	1.60561493263272	6.05101997428507	0.413278827063943	3.88506457986122	0.000102302690783353	0.0414443939238866
Arrb2	288.824684503115	-1.12959753366145	-1.30896330095486	0.292051808105567	-3.86779846010451	0.000109822371456639	0.0436512844736897
Slc66a1	147.629738195869	1.12288450378673	1.30228754197352	0.292681761047697	3.83653733586677	0.000124781233230294	0.0486785455412849
1110004F10Rik	367.634037358068	0.926572651025899	1.01719474345477	0.241959070948172	3.8294602777028	0.000128424609799561	0.0489339648732473
Rab31	104.585966788566	-1.05428921693543	-1.19812039416362	0.275757684197246	-3.82324510740128	0.000131706736327211	0.0489339648732473
Rrm2	64.4682325705006	1.36950617013674	1.7856173259965	0.358327267919251	3.82194237711587	0.000132404632952392	0.0489339648732473

## Sheet: RN_P5
	baseMean	log2FoldChange	lfcMLE	lfcSE	stat	pvalue	padj
Smn1	123.007719641477	3.82720430628725	6.58291708728656	0.437155123938858	8.75479685975851	2.04471428690324e-18	4.63679858841048e-14
Ptprc	40.1994098179764	2.61842883973039	6.66813876851236	0.447349652615223	5.85320414226982	4.82191653284117e-09	5.46733006076196e-05
Mgst1	163.253345650298	1.84473605080325	2.41679524787036	0.3847305204673	4.79487836983301	1.62773561775732e-06	0.011437131157984
Rpusd1	177.007365048201	-1.40491873140416	-1.60802597378482	0.295668184118089	-4.75167368986525	2.01739756722389e-06	0.011437131157984
Col6a3	17.6300146925366	2.04162909848634	4.30845285751588	0.448569677648358	4.55142021455764	5.32850041304354e-06	0.0210386470637549
Rab11fip1	27.2273274339629	2.03422319450916	4.47684082811076	0.447847886465708	4.5422190345983	5.56651595813068e-06	0.0210386470637549
Zfp945	326.676077088404	1.21279124571657	1.35853964939015	0.278730433124231	4.35112604003319	1.35440164137349e-05	0.0401390601285585
Pimreg	49.2279837110043	-1.94426357302395	-5.25948185415024	0.448582039889852	-4.33424301494851	1.46262534703823e-05	0.0401390601285585
Zfp52	73.343715061096	1.88054145417635	3.01937456399874	0.43671541997779	4.30610271162853	1.66155930192462e-05	0.0401390601285585
Lrr1	29.8833336839602	1.8409923451569	6.22150133328232	0.43089740424766	4.27246097797048	1.93327393179514e-05	0.0401390601285585
Ednrb	336.528544895192	1.30799643204863	1.50995258444593	0.306978027387987	4.26087965701684	2.03623860982953e-05	0.0401390601285585
Nme4	29.5246676905323	1.89658661447252	4.16267500110942	0.447417630918409	4.23896262330882	2.2455503773482e-05	0.0401390601285585
Msc	40.8319835787529	-1.89684864934115	-4.53189021630816	0.448059142798406	-4.23347828033184	2.30104414901116e-05	0.0401390601285585
Kmt5c	78.2769059793841	1.22569484864493	1.3911027830732	0.291758417900487	4.20106078674648	2.65667241642644e-05	0.0430324002766446

## Sheet: RN_P10
	baseMean	log2FoldChange	lfcMLE	lfcSE	stat	pvalue	padj
Smn1	28.0517200887011	3.9062351628643	5.97298048082126	0.439266247558165	8.89263671993615	5.96756622157994e-19	1.29239581660757e-14
Plek2	21.3338779096189	-2.4602249268141	-3.65082187995023	0.444482603647682	-5.53503085750503	3.11173565445972e-08	0.000336954295343171
Gm12002	10.1082133150245	2.59977780753889	4.88068147577565	0.481418039398685	5.40025008366146	6.65480605013724e-08	0.000480410448759407
Tsix	25.3657676444576	2.36896243425768	3.72040607270788	0.465471424401766	5.08938317170022	3.59230092648401e-07	0.0019449615291216
A930003A15Rik	14.4338003784491	2.193683606333	4.24750858637685	0.487892942093852	4.49623968102211	6.91657669892936e-06	0.0250076932315754
Itpripl1	15.0615382369364	-2.11640045410027	-3.59919956684753	0.470742260695501	-4.49587944573614	6.92829844343409e-06	0.0250076932315754
Pnrc2	89.5027632645902	-1.55889984632843	-1.83065125909468	0.349524107560254	-4.46006387716673	8.19352288767994e-06	0.0253495893112121
Egfr	8.94846727365382	-2.08253373616062	-3.64460123261354	0.470645139201893	-4.42484913302647	9.65097050399459e-06	0.0261263835256264
Hmmr	18.6121594157889	2.13949569401946	4.27972174124338	0.489319537893475	4.37238967246232	1.22893924601338e-05	0.0276320254104411
Rhno1	35.924150914762	-1.95863445801778	-2.90435053308862	0.448795855681347	-4.36419907453078	1.27589349450252e-05	0.0276320254104411
Traf6	27.1650292117492	1.96910102688811	2.947482886836	0.459342295292188	4.28678361881648	1.81278713713336e-05	0.0356904827535428
Ptgds	19.8415863319954	2.08614453241732	5.76628277304359	0.489886290547317	4.25842603206269	2.05871316390289e-05	0.0371546258255374

## Sheet: CN3CN4_P2
	baseMean	log2FoldChange	lfcMLE	lfcSE	stat	pvalue	padj
Smn1	58.4719836303802	3.91456874461805	6.9210888462277	0.399157767459695	9.80707144829224	1.04970777712544e-22	2.32951149899678e-18
Mapk11	151.99930900292	1.42447643340385	1.59167802881496	0.25484765377495	5.5895214741187	2.27696208594376e-08	0.000252651713056319
Gm23347	71.6106831867405	1.39334471488916	1.55938214273279	0.256229050922465	5.43788735068448	5.39160434599765e-08	0.000320405151230016
Myef2	1502.67402994107	1.1370529399052	1.22039804806506	0.209570792983667	5.42562693835786	5.77514692195415e-08	0.000320405151230016
Snhg11	21993.891099139	0.852844204877721	0.887708899177981	0.161193175291395	5.29082080141422	1.21768631263782e-07	0.000540457893001171
Gm17066	305.057472321473	1.12225159969372	1.21260349309352	0.218175875003232	5.1437932799724	2.69245795828248e-07	0.000995850450170081
Ubp1	164.225553072296	1.15942264417508	1.2623882122428	0.227478806710667	5.09683807885348	3.4537349436531e-07	0.00109493265527928
Col5a2	2613.27743665494	0.99134462909317	1.05675007609218	0.200114642105813	4.95388352726825	7.274676086887e-07	0.00182493249298005
Klhl23	874.907406201349	0.817502681961919	0.852719024530992	0.165134268321452	4.95053322530584	7.40104201370784e-07	0.00182493249298005
Col1a2	25.9725234892042	2.01404000722887	4.87789487061222	0.412240234366288	4.88559786097767	1.0311547276234e-06	0.00213156244758839
Lysmd2	367.79294470802	0.952436144821596	1.01224053772827	0.19574256516891	4.86575898297706	1.14018397025902e-06	0.00213156244758839
Gm12940	1487.55676680088	1.19254402244068	1.3195679519175	0.245267678471566	4.86221433607664	1.16079830109273e-06	0.00213156244758839
Prima1	21.4302065124065	-1.96283390267585	-3.58710575882388	0.404895408138262	-4.84775540355247	1.24866221244814e-06	0.00213156244758839
Pnn	642.490619245853	0.820977142530418	0.85874916330369	0.170155812698444	4.82485511080001	1.40105080805981e-06	0.00218843710835887
Ttyh2	46.8078077775734	-1.84342483175418	-2.77772534102086	0.383601572408325	-4.80557162521727	1.54309981211321e-06	0.00218843710835887
Arsj	27.4352745432711	1.98011934843987	4.74790688163799	0.412428780794864	4.80111825518975	1.57782055397179e-06	0.00218843710835887
Gm17477	32.4411509103915	1.98106266610662	4.1356129035812	0.414382977287808	4.78075301035033	1.74639815492839e-06	0.00226905621039525
Rbm26	636.560160345735	1.04535437963934	1.13042923531446	0.219142711277122	4.77019917088374	1.84043852681662e-06	0.00226905621039525
Nup37	52.0083786753362	-1.69897700985931	-2.29607947297492	0.358112224260514	-4.74425862833256	2.09271341009269e-06	0.00244428926298827
Agt	145.683524164614	-1.45033808496386	-1.74256579171711	0.306958097738858	-4.7248731851268	2.30259001966402e-06	0.00255495388581919
Pitrm1	108.610441457902	1.22493548700999	1.37756445203729	0.260938165990945	4.69435156163584	2.67453732952584e-06	0.00282634916270654
Arl10	20.8988633689954	-1.93451364408538	-5.04468589017472	0.414399581733979	-4.66823261739495	3.03801820307678e-06	0.0030627998854926
Flnb	246.347984075243	1.40197610584292	1.65756419740682	0.30090451502614	4.65920594684704	3.17431494981659e-06	0.0030627998854926
Sema5a	138.078523377354	-1.55006421191835	-2.00551587383895	0.343140881688008	-4.51728224364622	6.26383894822955e-06	0.00570790249855329
Tmed8	117.959984636488	1.19105164854112	1.34373810328559	0.263990076892523	4.51172885951327	6.43013529487348e-06	0.00570790249855329
Etaa1os	9.41401827331347	-1.84115353212088	-3.85876761268959	0.410789421851863	-4.4819886642184	7.39506726641264e-06	0.00626320623235006
Arglu1	4479.25618575402	1.11545393320266	1.23910198362537	0.249230745282684	4.47558719907322	7.62015898852972e-06	0.00626320623235006
Syn1	2729.07550755779	-0.405442573089442	-0.410475926107	0.091214007216804	-4.44495955676804	8.79084031153751e-06	0.0068515769585708
Msl3	189.850001859679	1.31736790685108	1.54822294235741	0.296636557983616	4.44101669668054	8.95348467008621e-06	0.0068515769585708
Magi1	1249.78473569421	1.1311256044645	1.26660186823919	0.257033833347718	4.40068760494384	1.07908385210572e-05	0.0079823429486434
4921531C22Rik	24.82713745312	1.81579377481325	3.62178965368931	0.414359773858753	4.38216711507382	1.17504620614067e-05	0.00841181464731414
Slc4a2	135.626150173251	1.35003099331938	1.61614580499607	0.308988233894366	4.36919871123933	1.24703257044863e-05	0.00846796336654309
Jmjd1c	797.527148896456	0.945463824959349	1.0203782698194	0.216697645911378	4.36305535753725	1.28258472196467e-05	0.00846796336654309
Ube2b	1819.53975993724	0.701076800675199	0.729589296757537	0.160777171553611	4.3605494107192	1.29736280850065e-05	0.00846796336654309
Pdpk1	517.965006891413	0.532732833290282	0.544945673639666	0.122757374068762	4.33972164467995	1.42663310049353e-05	0.00904566907604357
Klhdc4	128.554692290241	1.31344530010096	1.56348632581905	0.305205170142052	4.30348312739802	1.68133657985678e-05	0.0103645059389394
Zscan26	864.19233287808	1.24163134689461	1.44616159563488	0.29010053000598	4.28000371756997	1.86890191599161e-05	0.0109205774779698
Rock1	312.420228868879	0.792630249613858	0.836579579734564	0.185199283201608	4.27987752388329	1.86996189691264e-05	0.0109205774779698
Slc25a35	22.8785863018107	-1.71677534235637	-2.9647931164506	0.403015840538894	-4.25982100371235	2.04590678979709e-05	0.011373830222958
Dock7	396.607767818211	0.981395570307082	1.07130177932668	0.230408849746208	4.25936578125395	2.05007754559444e-05	0.011373830222958
Gm11418	36.4247971477626	1.69979922192677	2.68697280055795	0.400294996861358	4.24636639292172	2.1726523810014e-05	0.0115016199577598
Cpq	111.064088775259	1.74102343912746	3.02361950593629	0.4102395066272	4.24391949337438	2.19649180753293e-05	0.0115016199577598
Miat	3309.53016491743	0.862079303967775	0.92106410561828	0.203288750031494	4.24066409889489	2.22859435014271e-05	0.0115016199577598
Bdnf	17.9588135060854	-1.6421803058557	-2.53595118916714	0.388935198214474	-4.22224656805202	2.41879296779708e-05	0.0121995121684893
Ankrd13a	430.98506977773	0.761231713900891	0.801201205662222	0.180700621610075	4.2126679317325	2.52371952963575e-05	0.0124458630670392
Gbp3	20.7106423621048	1.68019695250062	5.38771166726398	0.399853973434986	4.20202639995476	2.64536274152429e-05	0.0127621499912842
Ccdc151	14.3548362897334	-1.7318705061946	-3.85399464965627	0.413502272576837	-4.18829743160065	2.8105501767754e-05	0.0132705807495744
Pwwp2b	70.5377886735633	-1.43563134829986	-1.86381717857576	0.3446103316396	-4.16595562143876	3.10051017770816e-05	0.0143346920549374
Gria3	1082.44207769	0.691303041173179	0.721701368114428	0.166671604118534	4.14769537276151	3.35838844861191e-05	0.015078966016359
Adamts16	256.447483388883	1.12972057758939	1.28769851402152	0.272970710082554	4.13861464201682	3.49409266181137e-05	0.015078966016359
C2cd5	542.177833029076	1.05864769562391	1.1842719890449	0.256060798953853	4.13436066726753	3.55944119421418e-05	0.015078966016359
Nudt5	165.087245740776	1.0796440119333	1.21448070007063	0.261185677725769	4.13362639687642	3.57083768262986e-05	0.015078966016359
Btg2	57.6487353587464	-1.53805403964271	-2.17625058877191	0.372394349753176	-4.13017555358222	3.62486327607323e-05	0.015078966016359
A2m	8.97524774197102	-1.69430480087432	-3.44212560524785	0.410771177687103	-4.1246925122992	3.71230375114525e-05	0.015078966016359
Tlr3	14.9913589233217	1.67775656557561	4.51209214135549	0.406910537542405	4.1231583131483	3.73712658119929e-05	0.015078966016359
Tmtc4	683.969665836573	0.908670627289189	0.984231957996653	0.22114797360446	4.10888063986702	3.97581484268705e-05	0.0155481490250562
Zbtb6	67.6119710910886	1.35828769418322	1.69235109002366	0.33121240471134	4.10095659118506	4.1144574474353e-05	0.0155481490250562
Gm3468	15.1059402793574	1.51317336820157	2.07993106594208	0.369020504755044	4.10051297611773	4.12235318686281e-05	0.0155481490250562
Gsap	64.3171986033714	1.65988743110311	2.72305085656593	0.405365856640166	4.09478845816201	4.2255402326026e-05	0.0155481490250562
Tial1	1470.9836185494	0.908538905202632	0.984905721108076	0.222157156669596	4.08962249437617	4.32075837318348e-05	0.0155481490250562
Cplane1	502.403444190504	0.945367039578238	1.03272301660622	0.231223455020494	4.0885430048368	4.34091079135558e-05	0.0155481490250562
Rtel1	181.548207023374	1.22966342796372	1.45407222861871	0.300769863389564	4.08838642976351	4.34384120202544e-05	0.0155481490250562
Kcnq5	15.5574858313486	-1.67975462363325	-3.5327454187341	0.412658599154	-4.07056735780363	4.68987779309197e-05	0.0165048925996698
Rcor3	357.950831322817	0.779493585278153	0.826154509709554	0.191657636782661	4.06711466531384	4.75988250891704e-05	0.0165048925996698
Bicd1	966.437701419223	0.660678066782705	0.688314318478487	0.162872909990585	4.05640242334282	4.98343677193019e-05	0.0170102911483894
Fam120a	446.768708664606	0.892279722230502	0.965673411550255	0.220159023880151	4.05288734708524	5.05893662488149e-05	0.0170102911483894
Osbpl8	481.989441608188	1.03090139761578	1.15238777351167	0.255347099709284	4.03725516674941	5.40802371060759e-05	0.0174179484504074
Nktr	1454.61653718665	0.730712695163626	0.769356930314919	0.181268720524807	4.0311019631411	5.55159514618492e-05	0.0174179484504074
Acsl1	123.631628410962	1.04945638545185	1.17988519640944	0.260574587580997	4.02747019651576	5.6380211440793e-05	0.0174179484504074
Ino80	329.076748497011	1.02061030147075	1.13884083772955	0.253517124598853	4.02580418614991	5.67809259374029e-05	0.0174179484504074
Tmem236	22.5552873584375	1.60265650081515	5.14382387066836	0.398114445971817	4.02561755050859	5.6825983832688e-05	0.0174179484504074
Gm10125	31.6276575846442	-1.58499832965177	-2.50532838814969	0.393986970515372	-4.02297143882308	5.7468467774053e-05	0.0174179484504074
Fkbp14	71.6580511124741	-1.6452234948079	-3.05338226802521	0.408984045198478	-4.02270825506037	5.75327444134501e-05	0.0174179484504074
4930594M22Rik	73.7343152032585	1.41501339640038	1.84327617428406	0.351951740862488	4.02047562808686	5.80807581709693e-05	0.0174179484504074
Fubp3	345.331861108547	1.25568227793589	1.51242959809584	0.312737126145295	4.01513658903585	5.94113776831804e-05	0.0175794305806019
Cbx6	10.1497302661694	-1.64871822546442	-3.41379679066975	0.412239315126202	-3.99942015467322	6.34978654446597e-05	0.0185413767098406
Nrm	30.1335299664135	-1.61988500797084	-2.89236395173144	0.406122552309658	-3.98866056257748	6.64474210068119e-05	0.0189914623153907
Fbxo11	732.387590833891	0.81299182242445	0.868991272886952	0.203906570022696	3.98708007463399	6.68914542988964e-05	0.0189914623153907
Hapln1	1188.52452986546	0.638380842004525	0.66417003787631	0.160297749192592	3.98246915642921	6.82029782100502e-05	0.0189914623153907
Evi5	304.417514649743	0.982787122972661	1.08933768030017	0.246939363887604	3.97987225487461	6.89523103343468e-05	0.0189914623153907
Cnot9	848.13578472645	0.851146036175474	0.916674000144713	0.213930283606803	3.97861406915093	6.93181528274446e-05	0.0189914623153907
Angptl3	57.8380484027717	1.55471903174961	2.34040899394486	0.392722987992942	3.95881850383952	7.53214461867836e-05	0.0203647226538469
Fam13a	165.768237716555	1.39394242918309	1.81781925130703	0.352347799559513	3.95615477356668	7.61658246336197e-05	0.0203647226538469
Bhlhe41	535.344911440738	0.79421505786317	0.847278788173277	0.201192035671405	3.94754720390779	7.89559539385683e-05	0.0208594110691037
Ythdc2	200.710354086498	0.994597412579054	1.10875838917344	0.252602420071021	3.93740254863518	8.2368365366406e-05	0.0215049266377798
Ano4	351.859090327239	1.03804787286424	1.17148990728329	0.264206150389301	3.92893152311065	8.53241297795168e-05	0.0220175940472911
Rce1	88.678393461965	-1.5055372731924	-2.23897005302221	0.384083948183469	-3.91981305210194	8.86176831295887e-05	0.0226046393564578
Katna1	60.2636603577623	-1.48728278681747	-2.17097812881059	0.379728894505658	-3.91669638085787	8.97706923603097e-05	0.0226385364188635
Stat4	28.8511554849773	1.61655030066236	3.26512225041521	0.414461285419867	3.90036502209061	9.60477639479039e-05	0.023949348062156
Atp7b	138.293225679783	1.22598692297817	1.48614394987636	0.316232967604278	3.87684728845957	0.00010581872829596	0.0256293269967319
Ddx31	53.0746307454253	1.46827831107781	2.07859957272955	0.378988262037823	3.87420524103533	0.000106973231639226	0.0256293269967319
Ice1	797.323489909435	0.909251274768808	0.996424755338208	0.234737875094623	3.87347493199505	0.000107294447550262	0.0256293269967319
Smpd4	326.949657894182	0.866388429847226	0.940437278736979	0.223686602445903	3.87322450416653	0.000107404804014783	0.0256293269967319
Actr2	3064.81799490775	1.01086873911614	1.13715192788551	0.261263617951403	3.86915234138787	0.000109214389745594	0.0257838908216406
Ube2m	1366.49095992142	-0.467171836288538	-0.477569859346175	0.120922205965869	-3.86340815201799	0.000111815947570123	0.0261202053523807
Naa15	392.024970278478	0.850987910812537	0.921461584903731	0.22073452798278	3.85525508215427	0.000115609021184975	0.0267249520639268
Wtap	1728.91055282701	1.18596477229032	1.41767836835759	0.307942612945825	3.85125254652224	0.000117515234581123	0.026885547276539
Sdcbp2	12.3264101631383	1.5320439370951	4.83529652733332	0.398719203679734	3.84241321450294	0.000121830498784176	0.0275883921328412
Eipr1	241.689426601682	-0.836895369951817	-0.905191023086744	0.218404222448365	-3.83186442354463	0.000127175820054507	0.0281674560625745
Thoc2l	636.345673099856	1.06761230923206	1.22535249399915	0.278642393828562	3.83147838547828	0.000127375566165945	0.0281674560625745
Pip4p2	954.429190937046	0.893200159189557	0.977596153609259	0.233335168909559	3.82797056853339	0.0001292042016276	0.0281674560625745
Mrps34	83.5580309266651	-1.51722752763332	-2.43430425852714	0.396404327456418	-3.82747468315702	0.000129464695312842	0.0281674560625745
Nr1d2	241.119714640267	0.824929541512322	0.890046385405802	0.216292075873281	3.81396099779274	0.000136757060134824	0.0294465244403297
Abcc5	4587.11420396545	1.06314890177606	1.22066989600096	0.278915039538496	3.8117302800709	0.000137997410859512	0.0294465244403297
Card10	169.316283230985	0.874882391225579	0.954577714284683	0.22968045299259	3.80912863862126	0.000139457392673371	0.029474651982928
Mtmr6	843.064235550675	0.732780166151238	0.777142766015382	0.192561698309474	3.80543053257432	0.000141557741637598	0.0296363151171847
Gas5	1169.12155944066	0.691705927062226	0.728794935640002	0.182383009491716	3.79260068681806	0.000149077773736316	0.0309190089229562
Lmo2	136.393227995827	0.811514975185886	0.87457446531646	0.214642218119072	3.78077985914077	0.000156337869416316	0.032124537019323
Hdac6	359.131323030347	0.683807096554011	0.719860753683368	0.181007669577641	3.77777968275925	0.000158232762080329	0.0322156096888685
Glis2	116.978113858222	0.881223592983927	0.964839201184948	0.23363844507053	3.77174053147762	0.000162112783259927	0.0327055171464026
C030014I23Rik	27.76512458326	-1.3198450527695	-1.74429161962373	0.350497922876187	-3.7656287430717	0.000166130492742276	0.0332141251796089
Man2a1	91.9593758371561	1.0136628491676	1.15250539485601	0.270535392334057	3.74687703676098	0.000179049799600487	0.0352212536267694
Luc7l	932.491599491032	0.571970991451096	0.592778409028054	0.152669512453979	3.74646504241318	0.000179343982508334	0.0352212536267694
Ccnt2	630.36514381429	0.839241445017117	0.911477939182122	0.224388937304397	3.74011952237483	0.000183932771989542	0.0358055796139642
Tppp	349.472009087073	0.908919539766762	1.00443883604697	0.24375694564134	3.72879442419718	0.000192398025879314	0.0371277999157715
Luzp1	669.025156792777	0.626197556152482	0.654300585012444	0.168179234937364	3.72339401107218	0.000196562399938348	0.0376044205123432
B830012L14Rik	593.392943382021	0.927279396409573	1.03019208220375	0.249203769375874	3.72096858218447	0.00019846013033551	0.0376429676273987
Snhg20	686.893076860034	0.829539860834995	0.900583763784607	0.223884723777395	3.70520974740461	0.000211215875980885	0.0397229044048118
Acad10	21.9251941110909	1.5300330316917	3.17655849855702	0.414331969724124	3.69277087816915	0.000221823862959483	0.0413673543428306
Las1l	535.100996932158	0.589865753538161	0.613642848203256	0.160095629473486	3.68445881675896	0.000229189076995651	0.0423846999723957
Gm26205	20.1915719209976	1.51739081467753	2.82131895844114	0.41322642380742	3.67205659477551	0.000240606379859309	0.0437525263121883
Chrac1	232.26301997845	0.970478919285584	1.0955715861682	0.264366666298985	3.67095796482913	0.000241643082979809	0.0437525263121883
Micu3	4258.67789055715	1.02043169955428	1.1704041580726	0.278042757285583	3.67005315842907	0.000242500033183091	0.0437525263121883
Rasal3	11.29898567235	1.45277737348637	4.69615627545285	0.39626507464726	3.66617566481117	0.000246204832273405	0.0439251084191867
Med7	147.522414369444	1.00328020618465	1.14507912543654	0.273752226808693	3.66492071272092	0.000247415219556522	0.0439251084191867
Etfb	530.253611012319	0.759127220785696	0.813667855233572	0.207637727017141	3.65601777524287	0.000256163600146061	0.0451173223368365
Uggt1	189.18884572375	-1.21125981664751	-1.52189204557456	0.331549411018476	-3.65333122724207	0.000258859957909402	0.0452332298104366
Frmpd3	115.271791365995	1.13633886016095	1.36598148549448	0.311252899928011	3.65085388898793	0.000261369905202012	0.0453150073143989
Sgpp1	249.520195565732	0.938803997235132	1.05224276462736	0.257822390432749	3.6412818749348	0.000271283916084888	0.0466692454709755
Mtif2	183.978553161098	1.09640752763696	1.29848680893445	0.301690781252768	3.63420958069763	0.000278834141061811	0.0475991327572593
Arsa	117.923451438322	0.675638574596049	0.713537253883032	0.186066697168819	3.63116336709647	0.000282146506308735	0.0477969104427744
Adamts15	114.285707942154	1.33089895343899	1.80701030607477	0.3670520116161	3.62591379782703	0.000287941403891909	0.0484090578421913
Lgr4	916.365531945959	1.05383770306873	1.22964887531987	0.291271587004249	3.61805871251477	0.000296821070381534	0.0495267157436617
Traf6	44.5714326378706	-1.45277301073393	-2.43892925552379	0.401796746483355	-3.61569132515143	0.000299547141073723	0.0496085832440901

## Sheet: CN3CN4_P5
	baseMean	log2FoldChange	lfcMLE	lfcSE	stat	pvalue	padj
Gal	257.062233339638	1.86376212562004	1.96474491366739	0.198615720015522	9.38375937954148	6.36614580634675e-21	1.49171528534317e-16
Smn1	80.858116730979	3.28516665537598	5.51977790783642	0.428487699813906	7.66688671997525	1.76221282201381e-14	2.06460854227138e-10
Tmem30c	32.921713593408	2.58949620865017	4.05662862845919	0.423504420195099	6.11444907105632	9.6891106122072e-10	7.56784132884131e-06
Cdkn1a	1052.65982900625	-1.61342607326063	-1.82936482486507	0.28997196531909	-5.56407607019938	2.63544971297386e-08	0.000154384644186009
Gm12592	21.5768916081225	-2.38726291070515	-4.25263729391934	0.439276952891169	-5.43452802381962	5.4941662362301e-08	0.000257478606494688
Ncoa3	914.317954243443	1.15084837305831	1.22510385932199	0.214558019640649	5.36380963520173	8.14847811450065e-08	0.000318225231964965
Mgat3	995.097593134944	0.770381916189553	0.791814672060368	0.145962228203125	5.27795393146141	1.30634294895571e-07	0.000437288971141861
Mlana	14.4055205635874	-2.28606389851894	-4.43278904923183	0.444259137780744	-5.14578925700608	2.66398361063091e-07	0.000780280799553793
Pcdhb11	34.8001881286722	-2.19119378578648	-3.51115606995541	0.430252277867915	-5.09281158636692	3.52792252480824e-07	0.000917580867570692
Zfp286	114.130756084357	1.64421906775381	1.94455080180235	0.324111799051632	5.0729997259121	3.91593064002514e-07	0.000917580867570692
Tln1	535.534122934929	0.743706480917953	0.76563804061351	0.150028672656685	4.95709565210777	7.15547539599256e-07	0.00140307954957933
Ddias	33.6957680478257	-2.04832976877652	-2.98525757243776	0.413279420933942	-4.95628300133512	7.18545348026287e-07	0.00140307954957933
Eda2r	10.6951860294971	-2.13121962799521	-3.79027470772806	0.439018694096813	-4.85450769329934	1.20686184912926e-06	0.00217532206529206
Zbtb33	93.1320886219173	1.8366137735135	2.41631960772299	0.382519603766498	4.80135855895801	1.57592800859597e-06	0.00258417398347541
Tsku	146.711793304745	1.78377311280744	2.29754886308061	0.373346663640793	4.77779309827623	1.77229603921965e-06	0.00258417398347541
Gbp7	16.4285358047446	-2.1373207111606	-4.64790078238904	0.448918400703332	-4.76104500909742	1.92593085767639e-06	0.00258417398347541
Snrpa1	689.142220224417	-0.933699068908614	-0.983012211256116	0.196311692236148	-4.7562071228312	1.97264080743441e-06	0.00258417398347541
Magt1	185.59970496479	1.07154198614975	1.14909529017517	0.225353697962246	4.75493411396899	1.98511145879812e-06	0.00258417398347541
3110001I22Rik	21.502214377567	2.08792855215538	5.15127145168461	0.44960741884138	4.64389257084745	3.41905393479465e-06	0.00405441704533885
Cmas	1459.28384840899	0.74026923766625	0.765145488645581	0.159492694888388	4.64139901946159	3.46058129509973e-06	0.00405441704533885
Hnrnpu	2011.10247025831	0.59940655574214	0.612682624385195	0.130943080913001	4.5776115206911	4.70315070319768e-06	0.00524782034653943
Vgf	1637.08169136687	0.620713326221637	0.635928304752752	0.137424619371	4.51675492399162	6.27945099160651e-06	0.00668818616524199
Gm4419	31.9726616300035	-1.88500898898778	-2.87250848787262	0.423381336985247	-4.45227227636033	8.49663303896712e-06	0.00865622197256859
Hcst	8.04672869731086	-1.9685253297817	-3.769375013807	0.444407449672617	-4.42955069999807	9.44296123576989e-06	0.00885364769508367
Cdkn1b	295.13754263032	1.56342565267336	1.93304850276155	0.352959277016016	4.42947885062225	9.4461075613303e-06	0.00885364769508367
Spag16	8.75705520205399	-1.93823932281541	-3.92451854555796	0.447384044651875	-4.33238365557632	1.47503613941782e-05	0.0132674578169361
Gabrd	13.6720344209278	-1.94439454671666	-4.38326023828288	0.449622790833979	-4.32450175203555	1.52876989184566e-05	0.0132674578169361
Abi3bp	11.1535688738132	-1.89890461274658	-3.37745709667934	0.441281169291745	-4.3031625749957	1.68377202826865e-05	0.0138994869147237
Gm2a	1944.3899469528	1.16538813452353	1.29656796700495	0.271120392498688	4.29841563662226	1.72023352904997e-05	0.0138994869147237
Gad1	274.440779742865	1.9254723698799	4.34082448520577	0.449658312464846	4.28207889525102	1.85155305826344e-05	0.0144618637537429
Decr2	695.361556299014	1.08882662843547	1.19431063321368	0.255144905648118	4.26748331764509	1.97690549424311e-05	0.0145692229786402
Sirt6	2020.37389524905	1.34753059069835	1.57498316729386	0.315892107421109	4.26579379174543	1.99192698416341e-05	0.0145692229786402
Gas2l2	7.18873160411635	-1.89396684298015	-3.62765677205638	0.444943329561505	-4.25664734618377	2.07515290862655e-05	0.0145692229786402
Tmppe	310.707349876248	1.63003226928135	2.1465382541318	0.383311837719993	4.25249655470353	2.11400469987098e-05	0.0145692229786402
Zscan26	1478.97674791691	1.50760330194695	1.87231287667288	0.355598690490092	4.23961994873813	2.23898530809162e-05	0.0149896867826294
Megf6	32.0613457920094	1.77992717679178	2.73500134593655	0.42507081531884	4.18736622851108	2.82210252940691e-05	0.0183687517969619
Per3	243.265809623656	1.11519045879712	1.2369917155657	0.267871303238841	4.16315762574533	3.13876527619232e-05	0.019877715662632
Pde11a	11.6484847636396	1.72597032695347	2.58776813096491	0.41943160082541	4.11502214796619	3.87142239726239e-05	0.0238724130559611
Slc36a1	931.972480546686	0.735060232312207	0.766960283947872	0.179593067991956	4.09292096031863	4.25972953143437e-05	0.0244003983779677
Snord13	30.1096847492379	-1.74485250543543	-2.69423763993614	0.426380197026275	-4.0922456474401	4.27215733505754e-05	0.0244003983779677
Nvl	715.482179297654	1.25488567469302	1.45034376004061	0.306920033373427	4.08864048690564	4.3390872944047e-05	0.0244003983779677
Nrbp2	988.437535117299	0.673355578592686	0.697635068279593	0.16481540601674	4.08551357464904	4.39794290701347e-05	0.0244003983779677
Sema4b	1003.13725396798	1.30562670364467	1.5351889804238	0.320463833765873	4.0741780072398	4.6177152873214e-05	0.0244003983779677
Ndufb7	4815.4283733877	0.634427862203219	0.654722926786228	0.155871261527807	4.0702041927725	4.69719490792095e-05	0.0244003983779677
Pik3c2a	202.699170939788	1.09400884020149	1.21513428571163	0.269294141984645	4.06250515565937	4.85488751029311e-05	0.0244003983779677
Rbm38	14.9607292034561	-1.79860737626241	-3.24072133309354	0.44286833198616	-4.06126888367945	4.88067198105767e-05	0.0244003983779677
Gm26705	9.51502028408047	1.82538461392233	4.16669559222746	0.449682311715434	4.05927599633376	4.9225104006365e-05	0.0244003983779677
Pde1c	18.2486204093219	1.81789362344749	3.62212680464144	0.448231449818202	4.05570297261561	4.99837453969976e-05	0.0244003983779677
Ube2l6	26.7894129171707	-1.80819993346401	-3.4992868955207	0.447419697352506	-4.04139545970726	5.31340671600137e-05	0.0254089277896621
Chrac1	350.076701151282	-0.901101160189702	-0.964976722546533	0.223536753057659	-4.03110964019985	5.55141378988231e-05	0.0260161455849045
Ano3	45.9831191843185	-1.74674548057533	-2.89970560339415	0.437194408560604	-3.9953518306106	6.45982481197678e-05	0.0296797284302431
Galm	23.5929832036428	1.78079029252954	4.96409818983933	0.446563048886317	3.98776902157636	6.66975526203609e-05	0.0298320386432427
Tmem258	2023.66723220435	0.558936337743654	0.5732713395652	0.140428389493868	3.98022322806786	6.88505842413611e-05	0.0298320386432427
Iars2	481.159092833704	0.839062974359788	0.891139577137088	0.210892060847799	3.97863708565748	6.93114438615913e-05	0.0298320386432427
Cdan1	262.108997385742	1.25260824823101	1.46242108642146	0.315025673545775	3.97621004704875	7.00222825784546e-05	0.0298320386432427
Zc3h7a	235.243130343907	0.929254929840311	1.00313777980238	0.234948532857391	3.95514250946333	7.64890440019533e-05	0.0320052014116745
Acaa1a	416.94336787614	0.943229607817698	1.02145673067146	0.239092662816738	3.94503786400452	7.97873700280181e-05	0.0324050814481518
AI480526	138.867472917042	1.11810081434206	1.25946290899528	0.283512078533564	3.94375019267368	8.02172188211248e-05	0.0324050814481518
Fmc1	1334.27183934301	0.63183491063987	0.653321622567175	0.160377595879023	3.93967067018812	8.15935389826286e-05	0.0324050814481518
Kif13b	16.3539081489994	-1.76710093530139	-3.77106026429473	0.449488119068354	-3.93136294450681	8.44656439732066e-05	0.032986649493003
AU021092	12.4355631444914	1.75990565945677	4.5634507804412	0.448304983754002	3.92568836670013	8.64820617178765e-05	0.033028027960102
R3hdm4	3891.28416764221	1.07923540461558	1.20522388411455	0.275092541576142	3.92317217483287	8.73906509698841e-05	0.033028027960102
Gm26798	9.99964971633181	-1.70113683586327	-2.82048282116319	0.43541249238225	-3.90695459047563	9.34667105823426e-05	0.0342243847851219
Pax8	19.6009374270809	1.75236949754895	4.35652557756073	0.448620748509391	3.90612673036513	9.37873376161806e-05	0.0342243847851219
Pgr	10.8020045914488	-1.74336897597606	-3.33490864165808	0.446653743190145	-3.90317780284199	9.49379058993224e-05	0.0342243847851219
Lratd1	992.222752905127	1.12895923864587	1.27979810445727	0.28987949093369	3.89458127930866	9.83685042673466e-05	0.0349237998786737
Qtrt1	154.970739610841	1.26970666012646	1.50550869942373	0.326630433297592	3.88728829493251	0.000101370331989634	0.0351978648347519
Gm11613	9.83072443388938	-1.70802618155135	-2.93887645946192	0.439619683799247	-3.88523590843427	0.000102230569374975	0.0351978648347519
Gm24289	10.5095401059623	-1.74260651408454	-3.59308091288377	0.448906470618291	-3.88189217162409	0.000103646836531149	0.0351978648347519
Pzp	49.1529236939078	1.69162561042627	2.80281334376447	0.43736017493841	3.86780897612474	0.000109817636791724	0.0363000299978861
Bhlhe22	15.046493548874	-1.73691216591729	-4.15056411361214	0.449231999417677	-3.86640348009222	0.000110452148254418	0.0363000299978861
Actb	129950.407824517	1.27396580277714	1.51716858034686	0.329700294808895	3.86401171862941	0.000111539866842259	0.0363000299978861
Abcc5	6449.4181251988	1.28076340402767	1.53076956831643	0.33217537964696	3.85568432371142	0.000115406334665105	0.0364206767886444
Ptgs1	11.0257839122158	1.73288894722285	3.92502608365513	0.449676533707131	3.85363437343934	0.000116377345688081	0.0364206767886444
Serpina3c	32.2817932301572	-1.69608707230087	-2.89322228182665	0.440173702650418	-3.8532221759006	0.000116573521643408	0.0364206767886444
Arglu1	6607.87214382143	1.20128201082485	1.397772338578	0.312427033593262	3.84500021335783	0.000120552333629601	0.0371681879159053
Kif22	105.693409189776	0.92953363446022	1.00916502261645	0.242284922866112	3.83653107037901	0.00012478441527195	0.037973356086394
Rpl28	150.586026642591	-0.876158745153778	-0.941613524949088	0.228714558924697	-3.83079568381236	0.000127729537760115	0.0383509190998275
Trpc2	136.258404722913	1.05037823893364	1.17250301854357	0.274558478439605	3.82569951910879	0.000130401270136235	0.0383509190998275
Cdc45	8.48231426643173	1.71944557083577	3.80127263250597	0.449659684317488	3.82388199521515	0.000131366806717893	0.0383509190998275
Gm26547	7.94803184031463	-1.71275418721507	-3.51281695720618	0.448566239734144	-3.81828598654722	0.000134382090187557	0.0383509190998275
Gm5898	5.49775934922136	-1.65406821098918	-2.7359247254971	0.433250873624492	-3.81780698363413	0.000134643197440565	0.0383509190998275
Ppp4r1	282.008205290429	0.731143155978621	0.767767961770244	0.191618792169802	3.81561300799099	0.000135845266528068	0.0383509190998275
Spry2	3053.0616910893	1.32235693998293	1.61875389799154	0.347438283191487	3.8060196701298	0.000141221156190808	0.0392335343576552
Actc1	5.81722835571706	-1.69714888926477	-3.2786358517519	0.446136702705982	-3.80410057942093	0.000142320349112355	0.0392335343576552
Nipsnap2	5893.9670689729	1.20134300763815	1.40455959292451	0.316194101755973	3.79938462155533	0.000145055823964174	0.0395226519433549
Epb41l5	327.218293765438	0.819067788511406	0.87256860505575	0.215752997504902	3.79632171039848	0.000146858893771065	0.0395539953890069
Mrpl42	2283.00580705012	0.667599135477811	0.695460531647281	0.176366136945962	3.78530225267882	0.000153521871067305	0.040673738343503
Hsf2	3033.45123387876	1.35815225898191	1.69722275635543	0.359095969999494	3.78214285998203	0.00015548408049561	0.040673738343503
Kctd2	208.010388394478	1.26586850195607	1.51878589977582	0.334800682817747	3.78096153001324	0.00015622381576115	0.040673738343503
Zc2hc1c	11.2714282157116	-1.64585689827954	-2.72650129980163	0.436090055192812	-3.7741216032818	0.000160572427569704	0.0413465178331132
Clvs2	584.027374024602	0.801150674943708	0.851797434401915	0.21267832398137	3.76695969737794	0.000165247664813667	0.041643877300362
Magi1	2023.63922900351	1.14973229698961	1.3261654819161	0.305295455329798	3.76596597465758	0.000165906386775138	0.041643877300362
Lig1	393.447631506213	0.965240503887278	1.05990158618171	0.256435213345997	3.76407160035747	0.00016716898446924	0.041643877300362
Lepr	13.7086124210231	-1.68326225420835	-4.37306196109367	0.447755117171788	-3.7593367214663	0.000170364419576314	0.041643877300362
Sdcbp2	9.01883903321867	-1.68970342259369	-3.96523738596399	0.449512182176369	-3.75897136850169	0.000170613358690455	0.041643877300362
Erf	12.6617733607249	-1.65530393678766	-2.88284579360522	0.441234080552047	-3.7515323719252	0.0001757570542563	0.04245710613746
Cr2	6.73387701939636	-1.6730805334173	-3.50827021925596	0.449044269552645	-3.72586991274623	0.000194642774215704	0.0465394845451264
Ak8	8.30847928036557	-1.67231903183429	-3.8520563355771	0.449612549797148	-3.71946697793198	0.000199643645549998	0.0472530293184601
Gm12115	124.219357535209	0.846399609183162	0.909023963180775	0.227717390887076	3.71688611873692	0.000201693300430933	0.0472607741569762

## Sheet: CN3CN4_P10
	baseMean	log2FoldChange	lfcMLE	lfcSE	stat	pvalue	padj
Cdkn1a	1232.51511398398	-4.88417339146942	-5.86846917535525	0.237143028284911	-20.5958970280224	2.98704503998792e-94	6.94906158102789e-90
Smn1	57.2531018693718	4.1436889323195	6.76255070595864	0.28949915374829	14.3133024006084	1.80723458757085e-46	2.10217527226241e-42
Iapp	75.3153489990876	-3.69219912531126	-7.21505184467467	0.31119120392045	-11.8647284331825	1.80487163827373e-32	1.39961779309333e-28
Cpne2	229.453789694345	-3.07867039869737	-4.11851534555402	0.276997178043728	-11.1144467984846	1.06709943298126e-28	6.20625030221899e-25
Ly6d	63.6325717370958	-3.34187260199801	-6.76005367999759	0.315680720446077	-10.5862423187445	3.45171180658286e-26	1.60601246936687e-22
Gpx3	391.141369815871	-2.64817684797116	-3.3140065894905	0.257647357578831	-10.2783000487824	8.82707354410312e-25	3.42255064883358e-21
Ccl17	321.812170635528	-1.68868414207761	-1.81577701643052	0.165048921429783	-10.2314157975036	1.4340729482453e-24	4.76603900971122e-21
Ddit4l	70.7165972493869	-3.18550193682722	-5.70539546693036	0.311831392777405	-10.2154626205359	1.69070715028465e-24	4.91657639302777e-21
Psrc1	47.5457677547592	-3.18072921843168	-6.31833364505519	0.315457449841577	-10.082910452833	6.57491732116454e-24	1.69954307288413e-20
Plk2	263.065755103405	-2.58843794412009	-3.2417343051167	0.257897988885965	-10.036673629373	1.05160682071155e-23	2.44645810770335e-20
Ptk2b	40.4460727680607	-2.91783070014178	-5.61391974906991	0.316578484425864	-9.21676880674145	3.06187791249936e-20	6.47559343239864e-17
Dapk1	167.172630177147	-1.49375693604024	-1.60739690712903	0.165863743557524	-9.00592802261325	2.13849419612813e-19	4.14582741489373e-16
Septin11	238.94054719029	-1.3248031313135	-1.40365689481203	0.149081073970302	-8.88646087683414	6.30862536251265e-19	1.12895277256534e-15
Septin4	1456.73187908021	0.993443857646769	1.029405186832	0.118928776856537	8.35326725713452	6.64001784651822e-17	1.05231058021502e-13
Tcea3	54.4433361345727	-2.44999420290574	-3.53562786519513	0.293387307279954	-8.35071641517171	6.78501491713607e-17	1.05231058021502e-13
1700007K13Rik	205.31050446257	-1.93320826460509	-2.29066858534974	0.234204444237697	-8.25436199939509	1.52715821711266e-16	2.2204880476818e-13
Pidd1	177.286174455385	-2.51821149712549	-3.91350987211648	0.305887478777196	-8.23247655377132	1.83382050641676e-16	2.50952942713409e-13
Crip2	504.524045928794	-2.32217151211402	-3.18343720889903	0.285595676955567	-8.13097570967541	4.25848680896304e-16	5.50385761798423e-13
Emid1	25.3876578268493	-2.53562369874882	-4.9052960649354	0.318383293170053	-7.9640601537296	1.66484258899042e-15	2.03846831527753e-12
Inka2	93.7616103192929	-2.48010579468955	-4.10631171544797	0.312235249374767	-7.94306792604558	1.97240859320335e-15	2.29430567561414e-12
Gpr179	23.2598321459692	-2.35752706442661	-3.70824235921245	0.304327676709242	-7.74667322380613	9.43312988789493e-15	1.04501111291423e-11
Ephx1	213.467561489895	-1.35923533028296	-1.47854961462496	0.176186928832514	-7.71473422739024	1.21234596321772e-14	1.28200074946805e-11
Dcxr	583.80203851296	-2.03324483665721	-2.59199056833658	0.26526967275114	-7.66482204908766	1.79079316931467e-14	1.8113483604755e-11
Trim72	140.719706007651	-2.33365304797514	-3.70882285159163	0.308966044909957	-7.55310522441146	4.2500134937521e-14	4.11967974661036e-11
Mmp2	81.2572202054818	-2.20710867198897	-3.55379009591073	0.310439958678188	-7.10961527435624	1.16366873530779e-12	1.08286357832802e-09
Ccng1	736.758312959572	-0.979406414541608	-1.028482577983	0.138072339041967	-7.09342958435661	1.30828537678162e-12	1.17061350020952e-09
Tap1	64.8011628489082	-2.1235553737054	-3.18821052892136	0.301914689197431	-7.03362721221141	2.0123233248033e-12	1.73387740104533e-09
Scn3b	206.282777569432	-2.06830832126557	-3.10889621388137	0.303095245822555	-6.82395501009095	8.8567629608242e-12	7.35870476859336e-09
2410124H12Rik	10.9826845391041	-2.17463238876791	-4.38244849460314	0.319831609527817	-6.79930414626129	1.0512567190366e-11	8.43325390057498e-09
Rin1	21.5046355303742	-2.10815050121891	-3.71093093032382	0.31594275746134	-6.67257106368982	2.5136026439692e-11	1.94921506364331e-08
Gjb5	28.0814726551773	-2.15128379083901	-5.76895162070391	0.323745099513218	-6.64499260088779	3.03232307839218e-11	2.27561174502308e-08
Ano3	80.9668697031878	-1.9283727868081	-2.73846526398673	0.293318130113434	-6.57433887929921	4.88698157272662e-11	3.55283560337225e-08
Them5	12.5942593875056	-2.09128021106935	-4.1617993675575	0.320567062739369	-6.5236902169504	6.85983178402781e-11	4.83597353404918e-08
Prss56	12.5634500193761	-2.09671873389821	-4.57916120344226	0.322637974815894	-6.49867311836015	8.10315124413462e-11	5.54446207481023e-08
Tmem43	278.187349470665	-1.32126764882871	-1.48727694952122	0.203753644703804	-6.48463319882909	8.8947913317805e-11	5.9122407297869e-08
Robo3	28.5783859207784	-2.01810348715261	-3.51269628278241	0.316279412152172	-6.38076147106799	1.76209586942781e-10	1.13870550851024e-07
Itpripl1	53.8241143803121	-2.05082242271389	-3.94604251823077	0.321766688617422	-6.37363187446759	1.84603396300317e-10	1.16070632744069e-07
Snord13	18.7723403602864	-1.97187803189749	-3.21588777985749	0.310496990230261	-6.35071544634029	2.14315822264025e-10	1.3120640234606e-07
Gtse1	51.093061378551	-2.02781102427818	-3.9548568248412	0.322091023343427	-6.29577006905916	3.05877496362401e-10	1.82459848086536e-07
Trp53inp1	85.6357300684706	-1.57516335453216	-1.94066954562736	0.252293763657967	-6.24337015586164	4.28241825437626e-10	2.49065445674523e-07
Abhd11os	45.0429047097376	-2.01102346421371	-4.39852242290233	0.323772153661391	-6.21123046399132	5.25713038951595e-10	2.93278805158104e-07
Tnfrsf10b	15.3684069668755	-1.97452919361461	-3.56046451946222	0.317953978888484	-6.21011003075744	5.29475146863841e-10	2.93278805158104e-07
Alox5	18.2113936086188	-1.9649816276714	-4.08227831999533	0.322816054352723	-6.08700094427265	1.15045292234727e-09	6.22421785708997e-07
Slc2a9	11.5561576606954	-1.94295718660353	-4.21706225956273	0.32308466943117	-6.01377091034477	1.81256615827905e-09	9.58353161504632e-07
Myl6	489.725547670844	0.672469785015816	0.694648806753266	0.113893216832285	5.90438837113602	3.53957440214372e-09	1.81209505759545e-06
Gdf15	13.4625195474747	-1.89759799602127	-3.70928880595106	0.321525484559705	-5.90185875505274	3.59428826729402e-09	1.81209505759545e-06
Apaf1	68.8688141706751	-1.66320214802122	-2.24025219513539	0.281954740921405	-5.89882667901242	3.66095545508022e-09	1.81209505759545e-06
9230114K14Rik	102.987652449588	-1.48037099440266	-1.81886270697651	0.251372376096184	-5.88915543303858	3.88174232241054e-09	1.88135111226164e-06
Cacnb3	130.228921629108	-1.35186202701203	-1.59272522589201	0.231829084541576	-5.83128743179588	5.50013465648331e-09	2.61132923772301e-06
Fndc4	1410.77322931829	0.816431070658743	0.858837018874783	0.140330698476835	5.81790783855832	5.95887388029780e-09	2.77254483902496e-06
H1f2	72.5917766209888	-1.57051587742417	-2.04493998074187	0.271757511421522	-5.77910751834988	7.50979249427996e-09	3.42564338405743e-06
Calcb	3716.41457811494	1.24349534415997	1.42458863124963	0.215666875140756	5.76581518765176	8.12640735204226e-09	3.63562962765214e-06
Rgs12	112.207029416849	-1.5285587796713	-1.94899319000227	0.265498647526697	-5.75731286735688	8.5463426041793e-09	3.75136064799297e-06
Hcfc1r1	1596.64189640844	-0.496669447650906	-0.50584627275302	0.0864546398287064	-5.74485589940531	9.19992996724233e-09	3.91773687290482e-06
Eva1c	11.9424029384568	-1.85973194111878	-4.25633044585634	0.32378557880044	-5.74371455334332	9.26218741445001e-09	3.91773687290482e-06
Calca	2543.53569953055	1.07292974064266	1.19287150024194	0.194756003076291	5.50909714563391	3.60678826512163e-08	1.49836289642481e-05
Phlda3	410.206356837765	-1.16042679497982	-1.32313111821038	0.212608697235277	-5.45804009934582	4.8141894973956e-08	1.96486499065634e-05
Klhl26	239.097704346721	-1.01753547497757	-1.12492032776722	0.19022723230601	-5.34905261798009	8.84158356050636e-08	3.48726724701182e-05
Ctxn1	163.52296876278	-1.39379519703798	-1.75138591108094	0.260571101538099	-5.34900143880377	8.84408388814036e-08	3.48726724701182e-05
Cox6b2	109.242891861513	-1.63524864069066	-2.50816885338782	0.306763745588017	-5.33064504593316	9.7864533553349e-08	3.79453418097518e-05
Lrrc49	1445.92425509344	0.593917339945109	0.612678024505943	0.111599736009153	5.321852552558	1.02715813416235e-07	3.91734538248409e-05
Axl	77.8560770813548	-1.59977986634268	-2.3932960748558	0.303018040278069	-5.27948720437441	1.29545925042365e-07	4.86089741965415e-05
Kctd4	33.6528336749267	-1.69656103403906	-3.36500199924903	0.323026986318093	-5.25207213606734	1.50397533632741e-07	5.55372733719378e-05
Lin7b	702.235857534268	0.847214158178518	0.907680246422454	0.161518049159989	5.24532188560131	1.56009712669478e-07	5.67095305553553e-05
Pmaip1	53.3193776766505	-1.6515754433469	-2.76972482541869	0.315937963664665	-5.22753082342418	1.71788766263522e-07	6.14845208977627e-05
Cav2	156.684939750055	-0.909265569080809	-0.986717926940474	0.174131690187488	-5.22171218864183	1.77276344422926e-07	6.24872254038629e-05
Lif	18.8832170661359	-1.66114970085152	-5.18141163877644	0.319656204075268	-5.19667592768004	2.02883594771324e-07	7.04460290859714e-05
R74862	65.1667943699069	-1.09033921618433	-1.24405179997652	0.212793249015448	-5.12393706674959	2.99220890965382e-07	0.000100377270233405
Mgmt	32.0611433306984	-1.65448174510645	-3.23895535953746	0.322916804873077	-5.12355417909188	2.99829439323091e-07	0.000100377270233405
Fas	82.2016115918348	-1.62759199504536	-5.21565997989509	0.317753996399024	-5.12217631718309	3.02029269099827e-07	0.000100377270233405
Cercam	113.471160337144	-1.35106083002008	-1.71961384331248	0.265083065419532	-5.09674515752949	3.45542990474372e-07	0.000113221297611208
Tunar	49.3202321795342	-1.54670196013741	-2.32506577610739	0.303820356096715	-5.09084374729997	3.56473695327469e-07	0.000115180611779142
Aldh4a1	102.688063568086	-1.11377966777959	-1.28564373445916	0.220044623613872	-5.0616081842291	4.15734726143849e-07	0.000131511460739774
Ptov1	755.075187242265	0.644222743998191	0.671241561981038	0.127306046334307	5.06042534936995	4.18322218652996e-07	0.000131511460739774
Hs3st4	79.3073761278482	-1.27694628345188	-1.57946787342092	0.253998837203011	-5.02737058765065	4.97250835475515e-07	0.000152839120146145
Kctd7	200.928331057326	0.790801634505738	0.843899793414065	0.157323971472292	5.02658067365796	4.99302490161066e-07	0.000152839120146145
Vcpkmt	120.370892268769	0.997699628225321	1.11554864079032	0.198892109489295	5.01628561729856	5.26799974910939e-07	0.000159162008004261
Ptprv	29.1751116219721	-1.61587788406151	-3.22310853350374	0.323218469780464	-4.99933647096047	5.75279383174758e-07	0.000169571151953804
Lhx1os	65.8209441827204	-1.50232113565642	-2.20900539875806	0.300515205338903	-4.99915181982953	5.75830510847253e-07	0.000169571151953804
Lgi3	2153.98939004902	0.811581779288301	0.870510905327164	0.16272255891689	4.98751853885737	6.1159752553839e-07	0.000177852560426564
Tagln2	162.543650082845	-1.22873434179968	-1.49852918382794	0.24848775327443	-4.94484869217141	7.62030283834788e-07	0.000218862623742377
Cuta	1032.02028657038	0.663519465704091	0.695371045022126	0.135411683650132	4.90001636356911	9.58286736175174e-07	0.000270043784766436
Cald1	47.2012341493643	-1.4789602793869	-2.19770160116845	0.301892635706019	-4.89896110227445	9.63447134440086e-07	0.000270043784766436
Riok3	351.640184713453	0.830215840553197	0.897113257414143	0.170101492964936	4.88070872325814	1.057052705049e-06	0.000291680242564916
Foxa2	43.2474126431812	-1.57828327629647	-3.6416668134564	0.323478434716981	-4.87909890400376	1.06571615448839e-06	0.000291680242564916
Shisa4	1247.61851711737	0.603630619219266	0.627813429675089	0.124644828245701	4.84280517463096	1.28018798655893e-06	0.000346305736271012
Acad8	111.322020575186	1.1065714856346	1.29766624762318	0.229354638363511	4.82471814623065	1.4020139092573e-06	0.000374901742355883
Homer3	22.6647270270144	-1.45652481559547	-2.17406701955973	0.302166668862602	-4.8202696249657	1.43364326471497e-06	0.000379003146708285
Mdga1	39.7782474479469	-1.48264257108342	-2.2960113524972	0.308086496314934	-4.81242309811534	1.49111257119626e-06	0.000389766773666403
Aldoa	10776.3662810805	0.47862401926679	0.490595495130661	0.0999453987228928	4.78885496863958	1.67735648221617e-06	0.000433578013358634
Necab3	381.217301225315	0.766201232371992	0.820181878369039	0.160653809606825	4.76926899055272	1.84895635654574e-06	0.00047268264482066
Dmbx1	13.3207525069187	-1.52872431270719	-3.76956246189045	0.322937342940004	-4.73381089591489	2.20343031328073e-06	0.000557180465306118
Uspl1	370.933701848923	-0.860426040376422	-0.942304379470636	0.182406453235177	-4.7170811400355	2.3925229098042e-06	0.000598490892190161
Snrpa1	437.933145164057	-0.878956461716128	-0.967313835826827	0.186598799033972	-4.71040792473754	2.4722147035707e-06	0.000611846838977328
Bag3	515.576709590606	1.06139219632308	1.236682490612	0.225792167980625	4.7007485060959	2.59209595632322e-06	0.000634763371872666
Dffa	318.319796236714	0.840756605008957	0.917601797011689	0.179344488297984	4.68794225564393	2.75965856136523e-06	0.000668757258037506
Sema5a	190.95239203922	-1.35438702070326	-1.87840794068581	0.289659180885291	-4.67579524516994	2.92816659140191e-06	0.00070065517196256
Pak4	24.342539574959	-1.42224485478753	-2.1498814478883	0.30439602768233	-4.67235024588362	2.97772615227408e-06	0.00070065517196256
Gpr88	33.3529888983562	-1.49602013739197	-4.0755322587945	0.320204267932867	-4.6720805661017	2.98163952993008e-06	0.00070065517196256
Mab21l3	7.37626933494614	-1.50925273197004	-3.50352809835719	0.323828311256677	-4.66065714301848	3.15201402423567e-06	0.00072863124614502
Mdm2	326.041112126757	-1.20035807796174	-1.49600817962577	0.257592024767804	-4.65991941731798	3.1633320091406e-06	0.00072863124614502
Shisa8	130.713102845993	1.12149281578084	1.34596935347518	0.240971026294891	4.65405668484144	3.25467264476912e-06	0.000742320631450085
Cp	8.41362852950636	1.48528621936413	3.90620610592101	0.322277181879008	4.60872287235573	4.05149923543749e-06	0.000915088137992405
Epdr1	1336.69777923733	0.659583062872627	0.695619163358352	0.143565388618324	4.59430416495556	4.34195669024915e-06	0.000967741943404653
Etnk2	81.0628048920989	-1.35871085394033	-1.94115749653856	0.295817865472216	-4.59306557354612	4.36781740274624e-06	0.000967741943404653
Slc16a6	52.4829741377441	1.19384682073455	1.50275178340163	0.260967862525546	4.57468904094535	4.76927809691053e-06	0.00104672156270308
Esyt1	836.153306392144	0.762101782702506	0.821022726459797	0.167158796106786	4.55914854887835	5.13614326032549e-06	0.0011167031477403
Btg2	82.755429528992	-1.43983114221135	-2.40285994077415	0.316026719019683	-4.55604243425276	5.21264101958803e-06	0.00112284148777496
Celf5	141.028786720631	-1.24936834578465	-1.63712232660459	0.274793577241769	-4.54657040504783	5.45271352916871e-06	0.0011637791517668
Eps8	81.8355975290014	-1.25694446011805	-1.660679820383	0.277094526127482	-4.53615767039646	5.72883578953275e-06	0.00121159668916082
Eda2r	13.2250525981631	-1.44977304541822	-3.96489547927568	0.320427355210228	-4.52449836708556	6.05389203753563e-06	0.00126880850775882
Spc25	55.935487087842	-1.45570152126687	-2.70432582418734	0.321948450239242	-4.52153604151574	6.139250417672e-06	0.00127521001532787
Pm20d1	37.3576000615218	-1.4611984554229	-2.9460669638112	0.323586668441961	-4.51563243460686	6.31280795116237e-06	0.00129965632014019
Mthfsd	250.611222179353	0.84459362917241	0.930336094965302	0.18738213293947	4.50733277459937	6.5647632428128e-06	0.00133967238667366
Ttc39b	717.499376972914	0.530952977280146	0.550077854646102	0.118652379629136	4.47486159940247	7.64608238960044e-06	0.00152259730482531
Lrrc20	19.3318108031771	1.34774727294767	1.99559279665893	0.301187730716044	4.47477481816253	7.64918845071247e-06	0.00152259730482531
Agt	80.1936543677207	-1.22373152840204	-1.59683728524715	0.273547105443338	-4.47356782086483	7.6925143921419e-06	0.00152259730482531
Efs	22.2787434527196	-1.4389701240264	-2.67825725741677	0.321721192356356	-4.47272407977561	7.72294024971573e-06	0.00152259730482531
Tmeff2	1011.38620344138	0.570057051754555	0.594061912378152	0.127553103004146	4.46917431507744	7.85221204544152e-06	0.00153507446239623
Gm11738	9.01810338235086	-1.41986761562547	-4.06822838578368	0.319852858218716	-4.43912748984898	9.03243026686061e-06	0.00175108714773538
Rph3a	2281.89425284692	0.643898371957803	0.680471497333985	0.146079393781166	4.40786585493634	1.04394165961315e-05	0.0019966620837224
Cldn10	51.8149121975193	-1.18565503090609	-1.52746970447843	0.269025885275725	-4.40721542349319	1.04708035683517e-05	0.0019966620837224
Col9a2	51.035115052072	-1.19618018205796	-1.55442350955569	0.271761096670192	-4.40158726438183	1.07461831105507e-05	0.00203251385271425
Fkbp1b	1189.8156936989	0.517130786376844	0.535473981261141	0.117823214433572	4.38903987523102	1.13852194295692e-05	0.00213375396623209
Nlrc5	26.3444928550319	-1.36309998049533	-5.12299970867654	0.310676435827422	-4.38752291227045	1.14648919265393e-05	0.00213375396623209
Nuak2	31.8274780596503	-1.20296294563959	-1.57689861366908	0.27433800266792	-4.38496647909093	1.16003640521985e-05	0.00214183229611386
Prmt3	174.522176595113	0.909227735736199	1.02876574418052	0.207519433780888	4.38141006444831	1.17913714205172e-05	0.00215995641517253
Perp	70.6765711747247	-1.23435876384588	-1.66747880987988	0.283116434217299	-4.35989795950338	1.30123107461317e-05	0.00236498747810944
Zfp804a	859.547594214939	0.663174543221334	0.704603361982307	0.15238031342465	4.35210118890631	1.34838999188071e-05	0.00242889372636436
Bbs4	212.480657181161	0.764604480395672	0.831077021749879	0.175744415650463	4.35066159892324	1.35727383264859e-05	0.00242889372636436
Tnfrsf26	8.18953307156066	-1.39762821702716	-3.68174202715632	0.321639245671373	-4.34532861221529	1.39067316968015e-05	0.00246966569614039
Slc38a2	1025.84944749993	0.614238249334657	0.646699270172659	0.141434939825121	4.34290317579333	1.4061211538222e-05	0.0024781820092818
Thumpd1	238.194053530273	-0.930605939376094	-1.0645403704755	0.214701168878112	-4.33442418706351	1.46142140348118e-05	0.0025562787616982
Tesc	591.256872963138	0.798779347765211	0.877585579539481	0.185170570466814	4.31374891675007	1.60509231719491e-05	0.00278663191546435
Map2k2	594.232604794226	0.540899664069097	0.563268198690376	0.126499910900906	4.27588968416596	1.90375481211282e-05	0.00328066310733279
Fxyd6	271.46364128355	-1.12982545722214	-1.43405380603514	0.264473155857317	-4.27198538755169	1.93740274725966e-05	0.00331409834648887
Map3k20	240.762098568677	-0.802534680736865	-0.884866431272645	0.188080871404907	-4.26696598512211	1.98149357480429e-05	0.00336477857841219
Sorcs3	213.786297185807	0.751564688217354	0.817584342227291	0.176421081193643	4.26006168385525	2.0437049405094e-05	0.00343055446532027
Sgca	9.24958351490035	-1.35253967104885	-4.11001372196719	0.317541951250345	-4.25940467306169	2.04972090216437e-05	0.00343055446532027
Mir3091	24.6928887994946	-1.15059388468323	-1.48724422021604	0.270322154157129	-4.25638027438337	2.07763212247483e-05	0.00345243097837531
Sh3gl3	115.543263112768	-0.799512850835217	-0.881408110822528	0.188035241967431	-4.2519308746054	2.11935283028385e-05	0.00349678186125699
Gns	455.32495738874	0.692615389026868	0.743219026049909	0.163164078287422	4.2449011834994	2.18689773311605e-05	0.00358281611712759
Baiap2	135.094306945664	-1.33140615529842	-2.17378576640293	0.314415229228034	-4.23454728502608	2.29012595230768e-05	0.00371401882691898
Nell2	2550.92020596108	0.44072483972182	0.452735127135209	0.104099539571012	4.23368673423552	2.29891124087145e-05	0.00371401882691898
Cyb5r1	175.186444211387	0.963438593565988	1.12668705017766	0.227906054080178	4.22734971852502	2.36460001879007e-05	0.00379379688531945
Heph	12.3246254607	-1.33473490196915	-4.16359705908005	0.315928035605478	-4.2248067646517	2.39145889497846e-05	0.00381060957073828
Map4k4	246.887947306934	-0.779882312434173	-0.856680439180029	0.184990339136525	-4.21580022002452	2.48894029990667e-05	0.00393895966918563
Cdc34	363.126469540927	-0.755522417774817	-0.825434193937919	0.180321817553655	-4.18985582568237	2.79131751163588e-05	0.00438764936423629
Cyb561	168.190579880232	-0.761555938596748	-0.833766974083148	0.182216203013087	-4.17940844998318	2.92268346341581e-05	0.00456330926798023
Slc5a9	10.4839439812452	-1.30840912777737	-4.30076703999142	0.314470349821487	-4.16067565199741	3.17307460715596e-05	0.00490789850027829
Ruvbl2	429.95334843015	-0.88872943079942	-1.0149320169984	0.213648307562897	-4.1597775378482	3.18557717306578e-05	0.00490789850027829
Ccp110	185.555388412693	-0.853685889164746	-0.963057910370324	0.205462691001553	-4.15494358125725	3.2536781703698e-05	0.00497984006286072
Nefm	76402.0473995805	0.61347002134834	0.649213100552739	0.147745768580991	4.15220027781742	3.29293879704067e-05	0.00500698876956563
Sdhb	3936.35825907751	0.572627780560841	0.601427048020925	0.138312222428132	4.14010974958038	3.47139699369979e-05	0.0052440636143787
Celf2	353.607360337679	-0.984831263780893	-1.17560817583005	0.238671049019392	-4.12631221016201	3.6862674796176e-05	0.00550452874878717
Susd2	1089.28948118006	0.683412015528861	0.735111592661709	0.165635150593477	4.1260083568021	3.69113860389786e-05	0.00550452874878717
Snhg18	9.35664408490825	-1.32220701857696	-3.48812539180541	0.320936049075242	-4.11984575240713	3.79126117626451e-05	0.00561782802577182
Ift27	380.189616494985	-0.822297725812723	-0.92057709318112	0.199953841260624	-4.112437753776	3.91503048422189e-05	0.00576451070790747
Cplx2	286.818105594492	-1.278605936987	-2.01758933310624	0.311098773641384	-4.10996778296818	3.95714322748066e-05	0.00578987295874906
Espn	7.25953765235903	-1.31693285384581	-3.33755541417868	0.321931426204381	-4.09072475269854	4.30027249317315e-05	0.00625259620507376
Rtl1	198.668491873591	-0.698378863437086	-0.755143307500652	0.170866417189104	-4.08727984659598	4.36460523013e-05	0.00630671901079157
Wdr35	264.71359275932	-0.939377507273645	-1.10271870226113	0.229989657555697	-4.08443369696376	4.41844399284795e-05	0.00634510376849474
Pfkm	1955.28823065033	0.455175332381233	0.469527229234113	0.111497342505303	4.08238727626698	4.45754344720434e-05	0.00636198102796085
Stmn4	148.21947510257	-0.859712915802596	-0.977394619668759	0.210689788375197	-4.08046788803839	4.494513842529e-05	0.00637563231906065
Lpp	139.852215836241	0.831249968601311	0.936135567822388	0.204274510003191	4.06927897459319	4.71588532036158e-05	0.00664911249047829
Gna14	164.597071752696	1.10371576669915	1.43053178396695	0.271550485928543	4.0644956422195	4.81364382412546e-05	0.00674606083882258
Abca1	58.8825343177205	-1.18424847717726	-1.65853462967359	0.291724345180825	-4.05947771154719	4.91826020290641e-05	0.0068514015185877
Chrm1	1284.44593027226	0.894842575150731	1.03378877828221	0.220866407066536	4.05151053542134	5.08880342913955e-05	0.0070467811294942
Ndufb10	4355.02318131044	0.597159798665339	0.632006685450385	0.147850345741217	4.0389475971233	5.36915575528108e-05	0.00739100825389699
Fam110a	67.8020734041377	-1.29765217654486	-2.38335844966136	0.321762756192516	-4.03294710643409	5.50816810602976e-05	0.00753776604815744
Pvt1	65.1279596827867	-1.26309926039756	-2.04269941881102	0.313569808222919	-4.02812779570798	5.62227819879517e-05	0.00764892865595151
Syt3	1257.9260509718	0.489244226691563	0.507914535055363	0.121884593648101	4.01399563347671	5.96994511715428e-05	0.00807469786078356
Mical2	218.24686484471	0.740525254435851	0.813319235842239	0.184815523635341	4.00683470668287	6.15378971695457e-05	0.00827524647255672
Fbxo2	1281.64700140362	0.571325945632121	0.602291835141917	0.143048951298811	3.99391914756995	6.49900330640335e-05	0.00865949496900163
Acer2	19.4423261187681	-1.27299795313512	-2.21623872995286	0.31880845563765	-3.99298679386966	6.52462036060696e-05	0.00865949496900163
Neurl2	20.7113880231347	-1.25024728101856	-2.02478365884267	0.313186386758382	-3.99202306958222	6.55119977022131e-05	0.00865949496900163
Eral1	237.826396151896	0.574020962296686	0.605547541023903	0.143932027526722	3.98813920821141	6.65935847099588e-05	0.00875272968752815
Syt5	89.9862481712522	-1.0795717446363	-1.39663608294861	0.270835821439794	-3.98607443763229	6.71754451140342e-05	0.00877960424231961
Plxdc2	157.170520563847	-0.832289355100621	-0.944170547240496	0.209206561804695	-3.97831381540319	6.94057285881147e-05	0.00902041826745196
Mycbpap	11.2717920678509	1.28284204713998	3.05869280146103	0.32275710000595	3.97463618032363	7.0486922034045e-05	0.00911004307888901
Ube2c	59.7659911032527	-1.23077368889401	-1.92555368350392	0.309977539962582	-3.97052537755663	7.17143165480352e-05	0.00921072640137822
Abca2	953.906663046428	0.520413770970279	0.543677755823453	0.131106837416098	3.96938696125074	7.20577804784576e-05	0.00921072640137822
Tshr	7.15104658617332	-1.26001717065896	-3.71252805923768	0.317697256263278	-3.96609396467302	7.30600694551774e-05	0.00928781123390845
Glud1	1094.17829359393	0.569230906131604	0.600390098267624	0.143693100072191	3.9614352104981	7.45005985101136e-05	0.00941946697684392
Kyat1	159.34837638113	0.810044420062151	0.912813671450733	0.20456198689301	3.95989710681594	7.49820631183205e-05	0.00942909576424113
Pak6	217.04369036872	-0.875024187228694	-1.01155479340144	0.221184227658695	-3.95608763107163	7.61872234069249e-05	0.00952913744805754
Tecpr2	115.730591802995	0.878766479698503	1.01831138740877	0.222642560331718	3.94698335479622	7.91420567386664e-05	0.00984577972175581
Sgpp2	681.486387417866	0.579390256582129	0.612705755797095	0.14686558343202	3.9450376530885	7.97874402571001e-05	0.00987327133053818
E4f1	146.919835246908	-0.883584524916769	-1.02643695078266	0.224125414727983	-3.94236649149834	8.06815637890964e-05	0.00990580475036756
Snord118	11.4986043905077	-1.27209894419829	-2.46096675985869	0.322727488498718	-3.94171240298095	8.09019473250446e-05	0.00990580475036756
Nmrk2	17.4847386811021	-1.26810431831737	-2.42329289991665	0.322781533494476	-3.92867678825583	8.54145471262549e-05	0.0104035812792942
A530058N18Rik	204.991347662921	0.978252816269255	1.19412634787251	0.249086460949931	3.92736246096448	8.5882503993409e-05	0.0104060967338681
Olfr920	6.57630720142768	-1.2494069062755	-3.58982549632952	0.318425823703954	-3.92369843545445	8.71998771830667e-05	0.0105109737968231
Trap1	511.310529974555	0.520427221892365	0.544639714743044	0.13352057882729	3.89773042075816	9.70984184869771e-05	0.0116438021014486
Acaa1a	229.634417715132	0.86088584531755	0.995901183487542	0.221698175697488	3.88314356944573	0.000103114642150393	0.0123018412050602
Syt1	1114.05882178444	-0.564732295424833	-0.596582750166648	0.145630856435809	-3.87783406103742	0.000105390558970751	0.0125092141015079
Mybl1	886.463643639842	-1.01712721306002	-1.28477913205724	0.262824014534551	-3.86999344356453	0.000108838280254777	0.0128528616845032
1110008P14Rik	3508.61260173144	0.477456302895952	0.496190211729116	0.123468457796834	3.86703058753353	0.000110168614344174	0.0129442557782973
Gpr149	25.1157881066439	-1.2507870897802	-2.47872045269771	0.323616624844132	-3.86502730007346	0.000111076774913396	0.0129853773446495
Chchd3	611.028636130254	0.465661642536235	0.483057264021723	0.12069195493439	3.85826580395833	0.000114194418843236	0.0132830947998452
Abhd3	347.303982128126	0.716248121858421	0.787675861063203	0.186002303171225	3.85074867163916	0.00011775729544943	0.0136293816981868
Rpl27	58.0193876075988	-0.921455753276303	-1.10323803823192	0.240229867741296	-3.83572518246824	0.000125194338322558	0.0143786477726365
Bloc1s2	155.856523459362	-0.66225986596896	-0.717529996712065	0.17267978739274	-3.83519041787286	0.000125467052005038	0.0143786477726365
Zfp488	10.5137930783856	-1.24122594003162	-2.73078117208026	0.323762333956531	-3.83375646222722	0.000126201092288577	0.0143918735833405
Kcng4	1366.8837472632	0.864422193587853	1.00727276838039	0.225892332351718	3.82670002380574	0.000129872622562138	0.0147383253233443
Aaas	188.235834488045	-0.860969129398462	-1.00202799949214	0.225174961162124	-3.82355624690692	0.000131540566720317	0.0148551443892303
Hdhd5	69.7307160970368	1.04728991996928	1.36937816916921	0.27413767883156	3.82030636734462	0.000133286009724728	0.0149795445905124
AI504432	126.301524922913	-0.838878061970289	-0.9673142585709	0.21972218385314	-3.81790335076492	0.00013459062878348	0.0150534441731677
Ndst3	74.1531217998226	-1.08495839291201	-1.4719763269546	0.284561234553244	-3.81274137573718	0.00013743390184035	0.0152979057053297
Fgf11	1049.19854171474	0.459038093491688	0.476115039652165	0.120460794944517	3.8106845775268	0.000138582496212677	0.0153523009137701
Spata32	8.41063695906416	-1.19938839957034	-3.72054558401781	0.314930598141532	-3.80842130503728	0.000139856840515879	0.0154200452026607
Gm15675	25.0248231873677	-1.22780168723057	-2.31466463043584	0.322500030129572	-3.80713665898658	0.000140585067637008	0.0154272217618272
Rln1	28.8114768988331	-1.22193284943182	-2.21570941084885	0.321246106303842	-3.80372812449309	0.000142534610742075	0.0155677238699701
Ddi2	217.511300142823	0.876993686033233	1.03107953269353	0.23076918597897	3.8003067104165	0.000144517105848621	0.0156925067776997
Phyh	910.054151758364	0.596998882364447	0.636986376895501	0.157128319790851	3.79943528422562	0.0001450261759459	0.0156925067776997
Snhg11	13572.1613059351	0.61257525454985	0.656150384926295	0.161287606357956	3.79803053924876	0.000145850356988277	0.0157086236341448
Cds1	1201.46595810625	0.510742036420091	0.534939639123846	0.134611082759372	3.79420494918002	0.000148117294624502	0.0158792660928314
Gfm2	206.379066421804	0.678214702820094	0.73976121267757	0.178860603732967	3.79186186709201	0.000149522077797175	0.0159563376966674
Slc2a8	184.15517234932	0.879681548620583	1.03806131528596	0.232822275331899	3.77833928204059	0.000157877690880663	0.0167710803682545
Dctd	18.801398577074	1.22271127460126	2.47400882839232	0.323760906006827	3.7765871416714	0.000158991949840482	0.0168126760049499
Tubb3	6293.48718734092	0.380674888474728	0.390384143708864	0.100878900491708	3.77358284655391	0.000160919748043043	0.0168644900243176
Dclk3	8.10992481641454	-1.19020020475464	-3.64408893632507	0.31540478387808	-3.77356421205936	0.000160931773787762	0.0168644900243176
Fbxw9	198.752597806172	-0.787259198822214	-0.892670316159537	0.208983905250211	-3.76708052172558	0.000165167740388718	0.0171322107847478
Snhg15	62.7852970593359	-0.991679157536665	-1.2549479198796	0.263285574718102	-3.7665533274979	0.00016551674259413	0.0171322107847478
Thada	50.2374770912466	0.865110264967521	1.01530715771783	0.229756910540247	3.76532859417945	0.000166330195057308	0.0171322107847478
Myh7b	70.8345154899681	0.988151776460246	1.2470043863147	0.262445087896745	3.76517535298286	0.000166432240257608	0.0171322107847478
9530077C05Rik	71.9968136223591	0.741572107205183	0.827226588474378	0.197155563478129	3.76135521677757	0.000168995231948248	0.0173194056213394
Zfp101	244.525326726611	0.737447676203392	0.821661470063999	0.196449498374666	3.75387915115437	0.000174118833891094	0.0177662304896597
Usp34	341.303438774035	-0.548270274556374	-0.579564691814275	0.146400133610638	-3.74501211873577	0.000180385068270961	0.0183252324377976
Tmem74bos	9.91903939583187	-1.15360269272272	-4.21204330060361	0.308181715290766	-3.74325482494737	0.000181651841470499	0.0183421248182783
Sf3b5	569.65630700667	-0.552374422044235	-0.584486696217057	0.14759121190226	-3.74259696715572	0.000182128216687684	0.0183421248182783
Tnfrsf12a	374.599891151406	0.766570542834555	0.864189722259958	0.204988971436976	3.73956968250967	0.000184335544674762	0.0184844056522141
Gm10109	13.1811611934182	1.19347552908243	3.07401257195595	0.320635194583355	3.72222247976638	0.000197476903192357	0.0197171788663819
Vwa7	235.933559615555	0.643527619339636	0.697547820821043	0.173044444147122	3.71885744446387	0.000200125949350292	0.0198962824174581
Dgcr6	296.558840900398	0.486405275554067	0.508123528069147	0.131040589344559	3.71186727705498	0.000205735865449995	0.0203669752077816
Cnpy2	204.849840047325	0.742539651515848	0.831785119308684	0.200489513142584	3.70363337152587	0.000212533360384205	0.0209507461693989
Ifitm2	44.6265701531848	-1.19525377829979	-2.30199492327215	0.323174756766866	-3.69847506116336	0.000216898656058748	0.0212022189295126
Polk	106.27945231481	-1.11888116230115	-1.65748848723103	0.302611729090528	-3.69741505282642	0.00021780606910938	0.0212022189295126
Mycn	8.60431675891119	-1.16710052278911	-3.45771575204306	0.315654340248514	-3.69740052321236	0.000217818531815402	0.0212022189295126
Sdc1	39.2782870393273	-1.18472168841572	-2.11543160837977	0.320604781182413	-3.69527143059559	0.000219652005541342	0.0212529619337467
Chl1	397.125948141983	-0.868832272347983	-1.02979922940289	0.235157876606282	-3.69467646538859	0.000220166945754511	0.0212529619337467
Psmc5	1134.30435060085	0.47094695883981	0.490783724827022	0.127579424579477	3.69140212375255	0.000223021217637423	0.0213116253918944
Cenpt	145.046593580796	-0.907134569113177	-1.09933611650113	0.245786711381803	-3.69073886872606	0.000223603597561456	0.0213116253918944
Sez6l2	2462.51134493828	0.440344401074113	0.456400167859319	0.119339092300026	3.68985880977761	0.000224378549074946	0.0213116253918944
Spint2	91.3193297679886	-1.0967142341932	-1.57464120461254	0.297229419896015	-3.6897903127385	0.00022443897098582	0.0213116253918944
Sema7a	454.235865017056	0.659131653244797	0.719064656512588	0.179004624517677	3.68220460795808	0.000231225712904773	0.0217872154815425
Naxd	333.177757625407	0.639074614223196	0.693012928942256	0.173562533795848	3.68210004916673	0.000231320590781508	0.0217872154815425
Tmem163	183.8664614999	-1.11786505436112	-1.67627404150628	0.304646320839405	-3.66938636016025	0.000243133387593821	0.0227875815126332
Plekhd1	359.806840475482	0.734240070170594	0.822175147707015	0.200142819661472	3.66858062363921	0.000243900782180436	0.0227875815126332
Lyrm7	37.8542886898848	1.14285081616836	1.82633674872729	0.312530296497468	3.65676809248993	0.000255415261443619	0.0237679225688974
Polr3gl	51.0526498327584	1.0102006386164	1.33432878305095	0.277275850335316	3.64330552911384	0.00026915902788297	0.0249470742018702
Swap70	53.5291217879229	1.15762553956866	1.97180549883339	0.317969388124563	3.64068235120535	0.000271916443960537	0.0251026355249918
Kifc5b	5.83849842017932	-1.16084712660149	-3.1300981983567	0.319747386944218	-3.63051325515292	0.000282858176997778	0.0260095360856771
Npas3	335.286359209198	-0.675641572475322	-0.743236527604953	0.186200084320039	-3.62857823046974	0.000284986394463015	0.0260157099743168
Wnt5b	12.5230510584525	1.10395728395156	1.66309677817227	0.30425295414774	3.62841927712392	0.000285161882885608	0.0260157099743168
Tnks2	594.888750377104	-0.434650401327192	-0.450643112116007	0.119828184350232	-3.62728020694031	0.00028642241003954	0.0260286365123432
Ndufa10	3441.6340227434	0.420835081732715	0.435318046591501	0.116176098287494	3.62238952707208	0.000291894132418929	0.0263993461066221
Rgcc	193.02918609248	0.893711505057611	1.08522794671611	0.246771639700954	3.62161351337065	0.000292771290212711	0.0263993461066221
Serpine2	461.881053064646	-0.740513240385766	-0.834285021749147	0.204537587867844	-3.62042619210033	0.000294118144865494	0.0264183958384203
Fdxr	75.8677216161523	0.863967470232465	1.0324886312067	0.23902239589115	3.61458794273786	0.00030082569236779	0.0269169573355548
Syndig1	791.055114957007	0.529068362783192	0.559303597030422	0.146489580341613	3.61164501631725	0.000304260865739716	0.0271200183163553
Hpcal1	312.978264892629	-0.704398956249097	-0.783484742222429	0.195156916614533	-3.60939785516494	0.000306908593039431	0.0272516088109516
Diras2	159.015816223238	-1.05308788819633	-1.4744520657345	0.292152131617182	-3.60458738523335	0.000312649242806512	0.027560769787725
Tcirg1	54.4345361365989	-1.01526946095646	-1.36253192085705	0.2816675558219	-3.60449558343318	0.000312759767192203	0.027560769787725
Gpc4	27.7680618550764	-1.13233910405988	-3.33964243130634	0.314490573527914	-3.60055022113206	0.000317544484060624	0.027876810857307
Fibp	323.525076439239	0.498844094821237	0.524043902951856	0.138601113745751	3.59913482179021	0.000319277639233218	0.0279235902222616
Gm26780	9.85730650941056	-1.12385249098117	-3.58986304186294	0.312357119585683	-3.5979730267454	0.000320706869017705	0.027943537830816
Camkk1	288.595005291471	0.496755177184276	0.521762126122695	0.138324577694075	3.59122858327405	0.000329122813196824	0.0285698250978019
Taf4b	66.9221609547599	0.853898267658355	1.01791131667645	0.237927054465305	3.58890782545653	0.000332066213609989	0.0287181724662557
Prss12	397.950017549441	0.547348427466581	0.581788282741748	0.152839472550018	3.58119809192259	0.00034202220528769	0.0294696466067141
Stum	46.3678539909005	-1.15195053632148	-2.73296115024931	0.322034685218107	-3.5771008192527	0.000347426199367817	0.0297656240201744
Slc2a6	502.484675144029	0.487999046107004	0.511816889327616	0.136439987447257	3.57665707273426	0.000348016236824598	0.0297656240201744
Fstl1	1797.53190849183	0.487016094286882	0.510728199804663	0.136298419104946	3.57316025736067	0.000352698757671424	0.0299157227569108
Chid1	376.057131194829	0.738149581479868	0.833992108947748	0.206582921300947	3.57313942910383	0.000352726824112432	0.0299157227569108
Ss18l2	2573.75394927298	0.654061877086225	0.71683097381074	0.183083898068865	3.57247078517088	0.000353628944212108	0.0299157227569108
Trim11	146.748067385429	-0.862769653570024	-1.03588579638026	0.24159468759142	-3.57114497082454	0.000355424089394973	0.0299586449843647
Gap43	1647.64826009883	-0.738286805837842	-0.834914743189922	0.207197970447013	-3.56319516183024	0.000366368091599141	0.0307696291803698
Gm4660	63.1658235688332	0.870972085571475	1.05296667207377	0.244638453117017	3.56024195899762	0.000370513241318657	0.0310058275037311
Prkab2	616.142488631075	0.592027344032726	0.637326100981522	0.166456963523913	3.556639094571	0.000375629635584049	0.0312155878858682
Gm14057	9.45865231404177	-1.15034875626731	-2.28106606016625	0.323441716889589	-3.55658746598848	0.000375703430538304	0.0312155878858682
Prpf8	756.332835704595	-0.687540018448165	-0.763333161664487	0.193682438462695	-3.54983148655779	0.000385477815637202	0.0319137220746757
Ckap2	37.9241673861206	-1.14592135825674	-2.43776222351828	0.323812366268696	-3.53884371823485	0.000401883702946943	0.0331539803736088
Btbd19	21.0732749497142	-1.11625171084351	-1.8683994100494	0.316404191082994	-3.52792959860228	0.000418823532350092	0.0344293662777122
Cacna2d3	714.027524699207	0.546256263461188	0.581690561530371	0.154929689368831	3.5258333356672	0.000422152545084458	0.0345808338339607
Pcp4	1521.72752248176	-0.977598937069626	-1.29444315198503	0.278215060526098	-3.51382464781385	0.000441704292593956	0.0360554689926519
Scn3a	450.781231964071	-0.611333070853756	-0.663327103817718	0.174084584913669	-3.51170134424552	0.000445248048964208	0.0362176594793823
Plxnb1	50.2120186588957	-0.9358546194762	-1.1956997367518	0.266967501522657	-3.50550016065074	0.000455750226338297	0.0368371153474316
Sh2d5	67.3330185370979	0.953099561662771	1.23676250567251	0.271899582678585	3.50533661094081	0.000456030313792138	0.0368371153474316
Ly6c2	6.18180285414228	-1.1080699197568	-3.24020007325038	0.316258664478716	-3.50368241003994	0.000458872262014946	0.036938423195556
Gm27031	3213.8495425811	0.470146807896526	0.492313848922148	0.134317815372795	3.50025651170432	0.000464810652338449	0.037287431089661
Grm4	161.991249991494	0.622862290973818	0.678735461735878	0.178083875419955	3.49757825914891	0.000469502940768828	0.0374766669975982
Rcbtb1	132.984994546224	-0.806353403676171	-0.94751086713827	0.230587260562796	-3.49695556340839	0.000470600214772937	0.0374766669975982
Rps15	533.500858986351	0.361813019286935	0.371547826666238	0.103488636646007	3.49616181073631	0.000472002382664042	0.0374766669975982
Sulf2	427.746323240721	-0.617433645289632	-0.672017128074128	0.176942191991246	-3.4894653352106	0.000483987826162191	0.0382975945164531
Spaca3	6.24243325257262	-1.08918753118522	-3.48906839772788	0.312592369878051	-3.48437017707801	0.000493296707997195	0.038901880050328
Anks1b	384.372429846371	-0.550506387505146	-0.587939250833648	0.158159250313254	-3.48070938889	0.000500087767351606	0.0393041953367154
Tmbim4	932.768650773394	-0.635561913191868	-0.696278790549926	0.182744395167419	-3.4778736311426	0.00050540813350086	0.0395114802066872
Sod2	1568.58636203734	0.485230448400476	0.510111727845995	0.139536708129151	3.47743941294187	0.000506227444502573	0.0395114802066872
Cdo1	298.948305491893	0.501216229245394	0.52886781361968	0.144181246508196	3.47629280079016	0.000508396902164004	0.0395114802066872
Tmem191c	130.415822521133	-0.776879428340415	-0.901651738850789	0.223517293097196	-3.47570166753314	0.000509518744068353	0.0395114802066872
Ass1	35.5947614807257	-1.00621950165809	-1.39543153774315	0.290055783657449	-3.46905512095016	0.000522292283917504	0.0402849294614615
Emc9	1076.00429182156	0.450829282587591	0.470604458335352	0.129970154308323	3.468713913489	0.000522956013469798	0.0402849294614615
Emx2	16.8313636083518	-1.11191375708785	-2.77703147094325	0.320759935064273	-3.46649826096593	0.000527285145842633	0.0404843618246965
Crabp2	19.1390466818433	-1.12072779638957	-2.46059901415499	0.323440566163572	-3.46501927597662	0.000530193475873163	0.0405737533641884
Plek2	62.5315594319477	-1.11017636755819	-1.97606390282883	0.320627310579089	-3.46251342579985	0.000535155214484726	0.04081918331073
Ptp4a3	245.870359761486	-0.73139645003144	-0.83275563854666	0.21173748158984	-3.4542606464369	0.000551803789371869	0.0419515142351214
Sfmbt2	170.826576395986	0.601877231517636	0.653225699222279	0.174360841058675	3.45190598911539	0.000556641634770347	0.0421814690270272
Gm9938	10.7459844124294	1.05998561441568	3.71405960468965	0.307337977722357	3.44892493362227	0.000562823140988906	0.0424003633052325
Sbk1	326.35116992246	-0.62090363384685	-0.678169714974445	0.180049279844896	-3.44852050717298	0.000563666666114016	0.0424003633052325
Apoa1	109.44513697211	-0.739179582816503	-0.845072699314859	0.214386481401286	-3.44788336459012	0.000564997963575571	0.0424003633052325
Cop1	168.001644087846	-0.636484000261281	-0.698935057221902	0.184666205451964	-3.44667286958926	0.000567535340270692	0.0424538332992199
Ppa2	643.201448603318	0.373963868068703	0.385128043581816	0.108675442191931	3.44110739764231	0.000579338533457557	0.043197857828066
Asb13	903.955924982363	0.561317293832367	0.602379638576084	0.163245845482663	3.43847827901984	0.000584993466823502	0.0434043830051109
St8sia2	5.89419028894891	-1.0752592872405	-3.41125785106627	0.312749309022867	-3.43808685173428	0.000585839763738171	0.0434043830051109
Itpr1	338.808968669208	0.589203746649866	0.637533791794523	0.171452676963835	3.43653862444007	0.00058919833670688	0.0435146352544408
Pdyn	17.6552939003767	-1.06647898329062	-3.43964992244352	0.310420687163938	-3.43559249557166	0.000591259590774782	0.0435286807588118
Dscaml1	13.092596482585	-1.08056044130112	-3.19158153268298	0.314654005793361	-3.43412262804861	0.000594475190692233	0.0436273527957858
Card9	86.9200515629766	0.997771759455219	1.39066994364382	0.291022652824395	3.4285020419262	0.000606921969865041	0.0444007317828312
Glrx3	1052.24003828284	-0.523823986005869	-0.556923839794306	0.153136277609418	-3.42063940813494	0.000624741069088971	0.04556105401657
Limk2	563.120230795659	-0.463382116316687	-0.485666987871022	0.135533847515558	-3.4189401748039	0.000628655465999393	0.0455984994413268
Usp31	241.641202984494	0.596179288368285	0.647166042022644	0.174473912306461	3.41701106192371	0.000633127069944196	0.0455984994413268
Kcnab1	1049.62486696217	0.642441546191891	0.708227374434261	0.188019210456441	3.4168931176356	0.000633401417435377	0.0455984994413268
Gpr17	103.931223070414	-0.886328705893503	-1.10952264965214	0.259397034648071	-3.41688064050541	0.000633430446667847	0.0455984994413268
Etl4	636.830198364357	0.508089176668617	0.538143790955493	0.148730066955626	3.4161833385055	0.000635054754942825	0.0455984994413268
Stx5a	326.680657076241	-0.524840230016593	-0.558287801989714	0.153736274138332	-3.41389976411384	0.000640401317145999	0.0458409115141062
Adrb3	47.7167381969087	-1.08310445307444	-1.82732281423774	0.317356633421227	-3.41289369438465	0.000642770102091618	0.0458427594773826
Tfrc	936.174378526393	0.583151636142884	0.630632705101309	0.170901104898574	3.41221688700592	0.000644368223396841	0.0458427594773826
Zdhhc24	155.376148325567	0.664836666859021	0.739946161366369	0.195568576324995	3.39950660454878	0.000675075494439168	0.0478809643372951
Htra1	632.751709700726	0.690460083171156	0.776433732255435	0.203218378312895	3.39762618373057	0.000679732321389712	0.0479215354897084
Acan	215.246109162273	0.810298830779261	0.966807463383122	0.238490683102837	3.39761210055263	0.000679767310505665	0.0479215354897084
Stk38	299.269912289783	0.736080941114886	0.844682163709278	0.216758583009382	3.39585602976111	0.000684143344940562	0.0480843225882091
Col9a3	62.4684254575245	-0.857087207459818	-1.05601631977849	0.253018955677621	-3.38744267268204	0.000705474588133217	0.0494342193323228
Trp53	199.776383564624	-0.643705545188782	-0.711474984951383	0.190120747936994	-3.38577221146902	0.000709782743933404	0.0495676860074047
Cpeb1	942.706676010352	0.441464096060602	0.460979334122336	0.130415644588946	3.38505474133906	0.000711640608943998	0.0495676860074047
Hspb1	12.2286177501394	1.03102217875202	1.55591870299614	0.304727629811279	3.38342203951293	0.000715885289437478	0.049580105700358
Gpr26	27.175409327092	-1.0920676432754	-2.05790213297962	0.322777323334161	-3.38334685967025	0.000716081306538871	0.049580105700358
Syt16	137.686402839079	-0.760104693128962	-0.883937882232466	0.224796978315343	-3.38129408511307	0.000721452833352874	0.0496954358688557
Olfm3	87.4329478601021	-0.970314222156199	-1.32811303908005	0.286983648206351	-3.38107842805911	0.000722019314119378	0.0496954358688557

## Sheet: CN7_P2
	baseMean	log2FoldChange	lfcMLE	lfcSE	stat	pvalue	padj
Smn1	70.5118429948189	4.89579780572555	6.83761031013107	0.35269897074743	13.8809529138985	8.26379545243475e-44	1.93579408473284e-39
Fas	24.2706443657477	-2.32284824360542	-3.47716924648992	0.38598846440135	-6.01792140914897	1.76670925475606e-09	2.06925821463303e-05
Gm129	16.7737024177861	2.18469652438042	3.60644017568892	0.408611136932981	5.34663969459733	8.9602131405133e-08	0.000699643309388414
Trim72	19.668064315593	-1.87716941588646	-2.58102994050278	0.366944224125344	-5.11568051073952	3.12611817517619e-07	0.00183073295633755
Snord13	24.229537059672	-1.83105148016247	-2.47425352025325	0.36245287107958	-5.05183328996294	4.37589557351858e-07	0.00195070470357996
Psrc1	23.8269439628064	-2.10249604593319	-5.45289993895975	0.421046015295103	-4.99350657542642	5.92927660997788e-07	0.00195070470357996
Pmch	23.0776408810538	2.0829284344127	5.5439641864246	0.41838160770183	4.97853728765522	6.40666019609087e-07	0.00195070470357996
Mastl	18.516892809057	-2.07387834928053	-4.40032659078556	0.418514809235771	-4.9553284698994	7.22081998739314e-07	0.00195070470357996
C730034F03Rik	41.4264102796934	-2.05883756572167	-3.99505663981049	0.416087719751822	-4.94808538677775	7.49470323680667e-07	0.00195070470357996
Ints5	74.117576797674	1.27293074268684	1.42502311157259	0.260660720637616	4.8834774168239	1.04231092417525e-06	0.00244161333988052
Nfe2l3	40.7575181887577	1.48642087672414	1.77812264603196	0.311980325002975	4.76446992838401	1.89350752344871e-06	0.00385319560670398
Eral1	254.714862826852	1.11887216689668	1.22279075468831	0.235250945112201	4.75607937032111	1.97388889137451e-06	0.00385319560670398
Myo15	44.3980216149773	1.55857504541232	1.92336490864022	0.331361088030077	4.7035548279913	2.55670396097467e-06	0.0046069838681409
Cd53	10.1966136789867	1.90833768134018	3.34619223954351	0.414045690908741	4.6090026372495	4.046052014105e-06	0.00676991203074354
Smoc2	13.2224859500167	-1.92194512518151	-4.32302926175374	0.420194207545495	-4.57394483471887	4.78625909305327e-06	0.00719421555750865
Gm14379	18.8250175475039	1.90705113217741	5.03907943097787	0.417441097151766	4.56843167859939	4.91387188559823e-06	0.00719421555750865
Fcrls	19.6417270302385	1.9061272072141	4.25407655738261	0.420840098790799	4.52933837030021	5.91686768603454e-06	0.00775218791082704
Adgrl4	22.9382560049423	1.90294231090777	4.3497722296242	0.420269013743548	4.52791485614725	5.95685730607841e-06	0.00775218791082704
Abcc5	3138.10293097939	1.05157482507194	1.15445705646422	0.240544188170426	4.37164927188719	1.23311499388021e-05	0.0152030098587599
Plpp5	171.407235199466	1.21321450023327	1.39529969214235	0.284775622885465	4.26024702515082	2.04201089364264e-05	0.0239170525917894
Sla	20.4377976844262	1.76433207928844	4.1017259077719	0.420244354434293	4.19834808170946	2.68869133238609e-05	0.0286427793748984
Irak3	14.3350908008674	1.74248123072815	4.81951462151882	0.415050927876981	4.19823475553008	2.69003691034264e-05	0.0286427793748984
Spata16	10.7424798887815	-1.75555148742769	-4.29337993758759	0.421167244993271	-4.16830014275147	3.06879670118104e-05	0.0312550272718112
Colca2	9.93507610540514	1.7443591339995	4.08040116804455	0.420168027555787	4.15157513089903	3.30194830116989e-05	0.0322283912312103
Zfp358	182.985717087296	1.18488712476701	1.3653885987007	0.286209276451928	4.13993263759927	3.47407821743224e-05	0.0325521128973401
AW146154	23.9199051025706	1.46541237680985	1.91039295287194	0.356321487972051	4.11261298090671	3.91205909549798e-05	0.034037442942311
Slc25a45	17.2457268926818	-1.73180143555627	-4.25514832053138	0.421162413164872	-4.11195629387355	3.92320580338269e-05	0.034037442942311
Sephs2	31.2935372293154	1.58174808739029	2.24612917282033	0.385481314845564	4.10330676604646	4.07286638349858e-05	0.0340738910833765
Ppp1r15a	65.3033054591562	1.38352398657299	1.73279358380131	0.339023115049064	4.0809134397009	4.48590599731933e-05	0.0362352924093811
Gstm1	379.568044567892	0.824896432757935	0.879562661405929	0.203761687915641	4.04833922017493	5.15823496799636e-05	0.0395417224824068
Snhg11	18350.3251682606	0.848211656055787	0.908316134177587	0.209695088860063	4.04497625894247	5.23284267643377e-05	0.0395417224824068
Nme6	82.9836278682935	1.50094049245799	2.03648267327545	0.372291226034676	4.03163004523288	5.53913326064717e-05	0.0405481864470813
Nmt2	1202.43915301159	1.13651390418219	1.30389124030954	0.28267390215033	4.02058306598736	5.80542739577135e-05	0.0410814037137436
Ptgfr	17.111402380216	1.64346322204852	5.08218480203596	0.409404109186537	4.01428120815394	5.96272241736299e-05	0.0410814037137436
Stim1	105.697071457318	1.05141700394719	1.17991141036596	0.262916536912511	3.99905238481465	6.35966040490397e-05	0.0425642985671073
Baiap2	242.542734234011	0.953587871812008	1.04553623904108	0.239056513763577	3.98896418591251	6.63624389779643e-05	0.0431816703627448
Rps18	19.7230611136393	1.47300913332415	1.99372682705252	0.370491521784674	3.97582413284008	7.01359438991952e-05	0.0432994340402166
Slc36a2	17.772537908637	1.67324709441424	3.29102760383055	0.420892855847693	3.97547041050212	7.02402772050472e-05	0.0432994340402166

## Sheet: CN7_P5
	baseMean	log2FoldChange	lfcMLE	lfcSE	stat	pvalue	padj
Smn1	105.37296547595	3.51986845576614	6.63726767368982	0.319635723787365	11.0121247214147	3.34031826132307e-28	7.5641507027661e-24
Cdkn1a	1090.96778471296	-2.64860611938345	-3.68678333129603	0.30408214975649	-8.7101663859732	3.03429076324274e-18	3.43557571668159e-14
Tm4sf5	24.2509236747123	-1.82253050066724	-4.99993909567394	0.334736414895952	-5.44467353883129	5.19004835040588e-08	0.000379285026300628
Ddit4l	28.3852953102301	-1.79702077540228	-5.25149423994692	0.33284050889071	-5.39904466974705	6.69966926563264e-08	0.000379285026300628
Zcchc4	100.430345773992	1.53393621557591	2.0334275617274	0.287629606250889	5.3330261636485	9.65893881264177e-08	0.000437453338824546
Sox5	113.857981492675	1.72046668672375	3.49047963083586	0.336520209676825	5.11252114212096	3.17887395475301e-07	0.00119976001175636
3222401L13Rik	25.8417087110788	-1.67548209548618	-4.89002615888763	0.33164365526461	-5.05205532772624	4.37081041657917e-07	0.00141395716976336
Egfl7	234.601815577698	1.28797748735714	1.58221917009214	0.261188068420008	4.93122635788242	8.17149774016189e-07	0.00231304457907458
Pou6f1	364.510037732372	1.06908702871581	1.21831720989481	0.220762619130872	4.84269951554633	1.28086915648969e-06	0.00322280911652323
Snrpa1	603.486718468956	-1.09100032946874	-1.26583800212846	0.233648433063581	-4.66940999844777	3.02065997336264e-06	0.00674973843959543
Bcl6	354.135248365054	1.01625229758878	1.15446463364546	0.21842965949302	4.65253802962256	3.27874245244203e-06	0.00674973843959543
Plk2	432.782430862414	-1.26621565751245	-1.60647593548668	0.276837922194483	-4.57385190394154	4.78838361258327e-06	0.00903607890891235
Snord13	33.2858269731813	-1.50209401871882	-4.14185945752802	0.331002318757897	-4.53801660470386	5.67857900522445e-06	0.0097406168622145
Gtpbp3	244.649051978548	0.988126478019025	1.12203557798563	0.218340829778952	4.52561474195826	6.02201969843246e-06	0.0097406168622145
Hacd4	64.7567049451012	-1.39972009455418	-2.01830555645059	0.311598167852184	-4.49206779424384	7.05349612427672e-06	0.00977796894708171
Psrc1	24.0225042853416	-1.43017275559988	-5.61768860440594	0.319210889015289	-4.48033824914846	7.45248396757061e-06	0.00977796894708171
Cldn12	237.791249763563	1.03316378886213	1.19625399143054	0.230965804256594	4.47323270294303	7.70458521901149e-06	0.00977796894708171
Smpd2	114.048848485715	1.32088230377753	1.79745497863241	0.295409361474811	4.47136237383647	7.77228708533764e-06	0.00977796894708171
Cstf2	382.061347544355	1.15120253117869	1.41370552424451	0.261218249876227	4.40705246177924	1.04786814925458e-05	0.0122915873070787
Ctxn3	112.100344549249	1.42964449298444	2.3125469007211	0.324964751984052	4.39938326928024	1.08558951707473e-05	0.0122915873070787
Edrf1	239.194509693136	0.981697254854456	1.13319732450413	0.229121954002821	4.28460580797233	1.83063472076925e-05	0.0197403444056284
Necab2	525.418922629922	0.973339174501736	1.12128960345244	0.227908202003339	4.27075096879346	1.94815851740885e-05	0.0200527498303289
Areg	129.169126523616	-1.31317337740504	-1.8956853923439	0.312273168194628	-4.20520720687277	2.60843072108344e-05	0.0256817015995367
AI115009	17.3303592858825	1.38607999208627	4.99703766547258	0.330954857679608	4.18812402937476	2.81269796417032e-05	0.026538977249432
Cidea	168.824848972222	-1.07654109581027	-1.3071582447345	0.258012567550973	-4.17243666085215	3.01359388934503e-05	0.0270464780486309
Gm26710	134.857278268575	1.22875555912221	1.66714100635004	0.294976904607103	4.16559920431349	3.10535848648444e-05	0.0270464780486309
Abhd11os	17.4985305065726	-1.31852854574551	-5.13830675837498	0.317211394694839	-4.15662415599524	3.22984681689628e-05	0.0270888448772653
Czib	917.738103327699	0.667392443799591	0.710976170288299	0.16186812414252	4.12306281632059	3.73867688591764e-05	0.0302365493148589
1500002C15Rik	28.5124512578857	1.37690928557231	3.50088950796429	0.336722072910816	4.08915659632745	4.32944506674699e-05	0.0327835568128857
Cars2	79.9809848949682	1.21791346726333	1.67277991270178	0.297893194874721	4.0884232611474	4.34315170848563e-05	0.0327835568128857
Lamtor2	1038.08557666835	0.762980038522643	0.834856697176241	0.189154282862811	4.0336387153127	5.49197357042994e-05	0.038451236203815
Hint2	705.040642413386	0.896740438012385	1.02443683269203	0.222435829860974	4.03145679620437	5.54321873444529e-05	0.038451236203815
Zfand1	57.8264635203011	-1.30292454579396	-2.02825618952965	0.323841486026601	-4.02334043664478	5.73784629829301e-05	0.038451236203815
Ptpre	115.101771112624	-1.35745982707145	-2.6573133662446	0.337605609736638	-4.02084499760057	5.79897538606034e-05	0.038451236203815
Ncoa3	671.945555236943	0.76497478880504	0.83830735458452	0.190526246148861	4.01506251378801	5.94300405004868e-05	0.038451236203815
Fap	13.8857958163664	-1.28532665324783	-4.45201028444838	0.321166652961337	-4.00205513678458	6.27946600031076e-05	0.0394995854380659
Ints10	495.072094094492	0.81943864962719	0.913951500127041	0.205268458911128	3.99203391487423	6.5509000889622e-05	0.0395122276419624
Mipol1	37.3477206776104	-1.33780988303622	-2.43547659662455	0.335757908847838	-3.9844478649124	6.76372039706181e-05	0.0395122276419624
Ccng1	1020.5557128796	-0.91032111457649	-1.04786135674632	0.228551335702421	-3.98300500751283	6.80493211762656e-05	0.0395122276419624
Lrrc20	98.3379486241801	1.25434971930697	1.91254403761961	0.318319152755447	3.94054114698729	8.12980037069333e-05	0.0437094581217346
Lmo3	95.303047733558	-1.14932177904513	-1.52720440780833	0.292100207734037	-3.93468319643102	8.33065067019602e-05	0.0437094581217346
Tnfsf11	35.3803134939354	-1.29771088950779	-3.47255317948832	0.330311738528999	-3.92874590314887	8.53900060634695e-05	0.0437094581217346
Capn6	14.6915281957686	-1.26137627453932	-4.28222281201057	0.321130536441782	-3.92792379234853	8.56823503509163e-05	0.0437094581217346
Tsnax	561.053261061066	0.682260362340523	0.734923551786794	0.173944904485448	3.92227851892954	8.7715512209798e-05	0.0437094581217346
Cpeb3	252.260486802197	-1.07264006790896	-1.34982209265138	0.273648209008441	-3.91977740981991	8.86307895108555e-05	0.0437094581217346
Klf5	43.9334253563406	-1.27006226556079	-3.87263719441938	0.324049491666647	-3.9193465758228	8.87893607242125e-05	0.0437094581217346
Mesp2	23.2971726126876	-1.25351842685938	-4.16822903279562	0.320873976154468	-3.9065755405977	9.36133864504735e-05	0.0450778855702791
Zfp92	46.0664365922032	-1.27903788429521	-3.59576088047562	0.327897775196118	-3.90072144750055	9.59064519456795e-05	0.0450778855702791
Tmem184a	12.6554661298972	-1.23228052857299	-4.64991555885384	0.316867563676807	-3.88894500362894	0.000100680927475618	0.0450778855702791
Ephx1	226.661955179477	-0.964711349902431	-1.14849276163071	0.248128156439018	-3.88795598108401	0.000101091954108715	0.0450778855702791
Cntn5	128.020463975635	-1.26343305011884	-3.70070630196607	0.325353949977482	-3.88325714258666	0.000103066469642901	0.0450778855702791
Hsd17b14	17.6908940527542	-1.26800068488655	-3.76281084372022	0.326618557608254	-3.88220649240448	0.000103512918951403	0.0450778855702791
Myl6	860.048725769368	0.678317554375347	0.732042709691859	0.175914466196179	3.85595095754598	0.000115280599800648	0.0492552675940693

## Sheet: CN7_P10
	baseMean	log2FoldChange	lfcMLE	lfcSE	stat	pvalue	padj
Dcxr	444.286079072937	-3.43504810481163	-3.92120547861758	0.253407031887754	-13.5554569232837	7.35527046596919e-42	1.60845054549814e-37
Cdkn1a	1332.09149007056	-4.24522938835841	-5.50991984695712	0.319237482972629	-13.2980292565531	2.37649891118061e-40	2.59846390948488e-36
Trim72	94.9113263329844	-3.6841468450424	-4.45956089965901	0.283853906471884	-12.9790246357145	1.60916706066032e-38	1.17297550941733e-34
Cpne2	290.66781885706	-3.25808005576474	-3.74876607159236	0.257698614229121	-12.6429863253668	1.223183222948e-36	6.6871426798567e-33
Smn1	62.7717676145805	4.09027613405906	6.71499755141389	0.346602910167365	11.8010438287549	3.85499570603768e-32	1.68602092199264e-28
Lrdd	128.43403210129	-2.97752852810254	-3.40536583668089	0.254520679831751	-11.6985721163043	1.29616115740237e-31	4.72407536501249e-28
Ddit4l	43.1426371583176	-3.83009048275638	-6.74411842191794	0.358805740931158	-10.6745518419429	1.33902078673431e-26	4.183100937758e-23
Gpx3	710.939792506092	-2.36098472033908	-2.62721332158832	0.233400781141029	-10.1155819136376	4.71208444590213e-24	1.28804828328735e-20
Pmaip1	50.4635857589156	-3.35607395395416	-4.9239714634965	0.345205701644514	-9.72195400587611	2.43071461914721e-22	5.90609636572346e-19
Fas	61.6719897086796	-3.26293793952344	-4.56424173715214	0.338070724361686	-9.65164299773136	4.83743815341066e-22	1.05785097538784e-18
Tnfrsf26	51.991387018809	-3.18689138992417	-4.63656786249469	0.347122607729876	-9.18088110355564	4.27578312845911e-20	8.5002568593767e-17
Gjb5	34.824784231737	-3.38593082966067	-6.4208450929206	0.370240314772827	-9.14522458673421	5.95060890077965e-20	1.08439929535208e-16
Bglap2	28.1323072715294	-3.17228490236027	-5.37480510429584	0.365072056523913	-8.68947607923116	3.64114747771617e-18	6.12497023405364e-15
Bglap	39.3949152943064	-3.15269949625977	-6.58784580536056	0.378795998729128	-8.32294825403957	8.58019105352972e-17	1.34022584256134e-13
2010001M06Rik	30.9661832156778	-3.03882234268324	-5.19970710282641	0.369326619258759	-8.22800790471636	1.90352523964616e-16	2.77508599603881e-13
Tnfrsf10b	23.9212628403056	-3.06229127939423	-5.86987954827602	0.373273027939714	-8.20389112038604	2.32728895731403e-16	3.18082218240895e-13
Arhgap36	3088.19139146857	1.26443654098694	1.32139700277837	0.15728794747125	8.03899193368302	9.0580542419236e-16	1.16518547154344e-12
Scn3b	294.533814522584	-1.97997819338019	-2.24156515282139	0.248167192995904	-7.97840427446377	1.48237185621986e-15	1.80091709732311e-12
Zak	137.661394503911	-2.18618322232138	-2.57370242571101	0.276121502892811	-7.91746821387554	2.42395567293198e-15	2.78984540293034e-12
Spc25	72.0366090474079	-2.73031208083756	-3.82464513318282	0.345340629702126	-7.90614206962152	2.65488175314252e-15	2.90284770888604e-12
Ptprv	23.3505104468688	-2.90827667378175	-5.46003445006792	0.373674885666208	-7.78290643910071	7.08770513751937e-15	7.38066361653683e-12
Chrm2	506.337866827441	1.61446979047292	1.75976186304683	0.212922933375616	7.58241380990578	3.39184410189266e-14	3.37149303728131e-11
Serpine2	596.128166805196	-1.43713000979197	-1.53707793413403	0.190862752132106	-7.52965150998798	5.08759218144187e-14	4.8371941662509e-11
Polk	86.8916913158412	-1.93600956422664	-2.22280245667789	0.258490077719317	-7.48968618566807	6.90384838573142e-14	6.29055652079895e-11
Gfap	100.740991280266	-2.41854677552508	-3.16459934688814	0.324967203595536	-7.44243341717424	9.88472843832095e-14	8.6463696595681e-11
Gm16630	27.9143294383402	-2.59759248039679	-3.90751813690731	0.356309872940698	-7.29026243072731	3.09351847718703e-13	2.50843076089068e-10
Slc13a4	36.0381314501284	-2.57754820557261	-3.77607697198526	0.353567998480538	-7.29010605215869	3.09711132906751e-13	2.50843076089068e-10
Tap1	69.4650347137509	-2.59478991590092	-3.87017182844573	0.359197480157711	-7.22385333761706	5.05347584627146e-13	3.94676463593801e-10
Perp	170.865447232661	-1.9107137409516	-2.21846737159382	0.266722563437128	-7.16367492996894	7.85425253713741e-13	5.92264808559037e-10
Prss56	27.8048127310788	-2.71757177822916	-5.5039211642817	0.38137557333479	-7.12571010897843	1.0354544447679e-12	7.54777259939485e-10
1700007K13Rik	162.267449622976	-2.14366618522459	-2.6561428321044	0.304010727623396	-7.05128467663855	1.7727338986638e-12	1.25052080309613e-09
Ptk2b	55.6941304069713	-2.58725014947408	-4.36572371007372	0.375484039683838	-6.89043974186646	5.56201834258836e-12	3.80094428486632e-09
Ccl17	267.266109961054	-1.68595230325114	-1.90222674906723	0.245894884410279	-6.85639437881965	7.06202495613536e-12	4.67976853759903e-09
Plek2	76.3325471557933	-2.40425325448837	-3.47579077586995	0.352065286068286	-6.82899834101235	8.55095633806898e-12	5.4997739176733e-09
Dmrtb1	21.0885223259739	-2.55793162580314	-4.87413034216491	0.379197782505758	-6.74563972631959	1.52354235949625e-11	9.51909266213254e-09
Gpc4	17.6028908501814	-2.52442925546841	-4.80135468371429	0.37836820886734	-6.67188520680789	2.5253807817064e-11	1.53402852595432e-08
Cuta	652.624024964933	1.11017391042333	1.168325887201	0.168414709609106	6.59190585549244	4.34215925192839e-11	2.56633347354513e-08
Entpd3	134.846271859413	1.78363899333284	2.09102941045455	0.27309843782914	6.53112118659849	6.52791504390154e-11	3.75664332052734e-08
Trp53i11	46.0859964946584	-2.00993422032248	-2.52980878123664	0.310586472423701	-6.47141584962701	9.70888242549187e-11	5.44394463796555e-08
Ccng1	657.934741584891	-1.52625323334615	-1.7063232053319	0.23789269510297	-6.41572130949848	1.40157641848654e-10	7.66241827986593e-08
Snord13	22.0356738573724	-2.40594808933689	-4.5283477320464	0.380039584542492	-6.33078286366741	2.43920405763442e-10	1.30098815444755e-07
Kcne1l	70.6851536963372	-2.01475625336414	-2.59261960979762	0.319550052853718	-6.30497862657666	2.88233669794452e-10	1.50073664072978e-07
Mmp9	189.529921134533	1.60927205990558	1.84121704900558	0.256396982985564	6.27648594443949	3.46310676329887e-10	1.76119113255395e-07
Ephx1	257.870363173391	-1.29652776977402	-1.41261736923954	0.212614974380736	-6.09800778872844	1.07398514997869e-09	5.33770619539408e-07
Psrc1	28.9299348859841	-2.31727174605015	-4.26341465303586	0.381801295882393	-6.06931346499133	1.28458198294735e-09	6.24249751179839e-07
Ly6d	44.6233425552878	-2.32091732283986	-6.73556556245868	0.387055546887083	-5.99634171763193	2.01812125110017e-09	9.59397293892574e-07
Alox5	17.6896127655747	-2.30972879534587	-5.40040659381681	0.386409875457216	-5.97740622600004	2.26718353656341e-09	1.05486743782061e-06
Pvt1	96.0498554885891	-1.7917672181914	-2.22821361791172	0.304803670792393	-5.8784305764211	4.14174440355011e-09	1.88690972118404e-06
Layn	343.38043269867	1.40655793207617	1.57606003987531	0.239676164760597	5.86857659993486	4.39552316927393e-09	1.96165919725882e-06
9230114K14Rik	70.0488898834926	-1.83913227867884	-2.35291414487261	0.318545426506678	-5.77353220495942	7.76267610860965e-09	3.39508402286152e-06
Cutal	16.4934070151181	-2.22902969390549	-5.29515620263228	0.386810419535492	-5.76258958220997	8.28330513890586e-09	3.55175130936457e-06
Rbfox3	415.996973264989	1.021082029867	1.08133757719641	0.177552230905471	5.75088256936981	8.87787661738375e-09	3.73348857440284e-06
Plk2	228.138327708127	-1.72688487221762	-2.15484480045314	0.308018674172934	-5.60642914542278	2.06543472157596e-08	8.52206160215531e-06
Pdyn	49.2071836311415	2.1527850149058	4.24126016369522	0.384688766666977	5.59617332618777	2.19134631403836e-08	8.87414096210942e-06
Trp73	15.6178212130216	-2.14841603372891	-5.21163681868768	0.387124785680622	-5.54967316275468	2.86204147047636e-08	1.1379476886614e-05
Chodl	3355.52409382776	1.14566644545558	1.24203459121842	0.207168544218302	5.53011775884443	3.20015888890292e-08	1.24966204611659e-05
Axl	50.034936391309	-1.99612438996709	-3.09385185776093	0.367991503289642	-5.42437630250382	5.81572476007617e-08	2.23119770269027e-05
Pm20d1	32.4921949672231	-1.90623410560651	-2.73649879544543	0.3516481111272	-5.42085694558723	5.93140117925794e-08	2.23634277565539e-05
Dlk1	218.408258142651	1.29190445824113	1.45226081074473	0.242301431806823	5.33180695057186	9.72402833261429e-08	3.58679615658631e-05
Crip2	869.184429440269	-1.50819637350075	-1.79358478276891	0.282983231457749	-5.32963160301577	9.84121864803269e-08	3.58679615658631e-05
Hapln4	841.142055653412	1.06430554154565	1.14686720676469	0.200130266309457	5.31806388494953	1.04877248112087e-07	3.75976337986085e-05
Plekha7	25.6175478446027	-1.96312311088228	-3.12624117424158	0.370206569822897	-5.30277761364802	1.14053830785401e-07	4.02278898647605e-05
1500009L16Rik	203.577976494916	-1.08642901997227	-1.17544229578971	0.2050302376724	-5.29887216786132	1.16520172832982e-07	4.04454466589152e-05
Pigp	132.105998486978	1.32355931185306	1.50197689435027	0.249932581250679	5.29566535595273	1.18583830348264e-07	4.05186125321224e-05
Car12	12.0092278700131	-2.04163521408833	-4.431227767511	0.38584940919981	-5.29127469268996	1.21466765026951e-07	4.08651571939902e-05
Colq	29.3965828578972	-2.01329045940667	-3.88990417510192	0.385267379370808	-5.22569666472835	1.7350059661561e-07	5.7486531011972e-05
Phlda3	247.870858173249	-1.23663898512841	-1.3891530132516	0.242001249770716	-5.11005206088837	3.22070050996479e-07	0.000105119819032702
Wdr35	213.462747574937	-1.13449288373425	-1.24838311205349	0.222892576617631	-5.08986391987587	3.58320561617611e-07	0.000115231677080205
Itpripl1	119.331156981546	-1.67415250504975	-2.20059540482914	0.329892644345709	-5.07484035714156	3.87821465276848e-07	0.000122420385530495
Them5	17.0562411756718	-1.96169264490748	-5.32995190540312	0.386703109019734	-5.07286494251427	3.91870632299919e-07	0.000122420385530495
Tmprss15	20.1200412870929	1.87122707311019	3.00809419856545	0.369355157790866	5.06619992611475	4.05835682388017e-07	0.000124997390175509
Fam212b	111.788306492062	-1.56492237016156	-1.96021034859949	0.30976122359888	-5.05202798458734	4.37143632713946e-07	0.000131248208651851
Cox6b2	132.423818094116	-1.70130249944996	-2.28875500019712	0.336785163753355	-5.05159574278607	4.38134224967308e-07	0.000131248208651851
Penk	718.26711000971	1.23467202873529	1.39178845739594	0.244949623690043	5.04051408667455	4.64282949371194e-07	0.000137201885633098
Fndc4	943.997145126359	0.896295281554503	0.949754793713815	0.178490763984959	5.02152190703845	5.12636555599544e-07	0.000149471149304678
Tsku	69.8788010091998	-1.62636344978222	-2.11560638479785	0.324832220138448	-5.0067799588632	5.53481377715736e-07	0.000159256983787996
D430036J16Rik	12.8614677794839	1.91742950063996	4.02896310464876	0.385477605874753	4.97416573989762	6.55292272508823e-07	0.000186103005392506
Klhl26	202.149331989808	-1.38777325028438	-1.64053932679104	0.279666722747455	-4.96223947079171	6.96850040080134e-07	0.000195368162518876
Mccc2	133.125636948068	1.24784796215168	1.423592106751	0.254111911246289	4.91062365408856	9.07871840760967e-07	0.00025130811916153
Gabrq	81.4774647940209	1.70445744926313	2.39168259530378	0.347922698114091	4.89895444735888	9.63479762783183e-07	0.00026282584883719
Gpr179	18.9726843397075	-1.89647577954334	-4.32911454229561	0.387279523702223	-4.89691724833231	9.73518097485475e-07	0.00026282584883719
Eda2r	10.5647349677638	-1.89298717624097	-4.62577926971953	0.387277087538715	-4.88794002317973	1.01896560934627e-06	0.000271740731038831
Cenpf	156.75388318489	-1.58620265380101	-2.08247471473378	0.328806494034215	-4.82412203706644	1.40621302286619e-06	0.0003657417597443
Rab42	27.5613754266042	-1.86714219094957	-3.97615762103017	0.387191319312033	-4.82227286052573	1.41931608546637e-06	0.0003657417597443
Ptov1	676.532551364645	0.871895442992785	0.925458887807923	0.180818055332765	4.82194901050235	1.42162290004872e-06	0.0003657417597443
Cck	342.054456200397	1.18280699855885	1.33423702678169	0.245533805038577	4.81728777987621	1.45522733622367e-06	0.000370033853355106
Tmem43	283.345048648809	-1.00165536845129	-1.08752085670474	0.208693448571377	-4.79964931965126	1.5894369430082e-06	0.000395395234785277
Fbxo27	135.870040908727	1.24176138896204	1.42545090804794	0.258831901527951	4.79755927160295	1.60610690933483e-06	0.000395395234785277
Btg2	105.71715378218	-1.52059993296005	-1.93609024395971	0.31697836106979	-4.79717267711298	1.60920870202532e-06	0.000395395234785277
Dennd2c	13.2435613889172	-1.84683398338136	-4.04792202421607	0.386845444105114	-4.7740874592788	1.80523923121541e-06	0.000437525883019728
Rin2	41.7032068080707	-1.63707861653381	-2.24822273698769	0.34303249962644	-4.77237176744645	1.82069029425623e-06	0.000437525883019728
Col9a3	83.7120457521553	-1.3686539083618	-1.64549984840499	0.288786020670152	-4.7393357378786	2.14419974783209e-06	0.000508910905466118
Magt1	396.948287723645	-0.909996815280031	-0.974196763366208	0.192085972451411	-4.73744544521709	2.16429093691005e-06	0.000508910905466118
B930036N10Rik	107.715594064736	-1.51928492349461	-1.9665955362794	0.322672241347515	-4.70844630808621	2.49612094742343e-06	0.00058069332849208
Ces2g	18.068571276069	-1.81300827856821	-3.96848069937519	0.387144966624486	-4.68302169695196	2.82676578870627e-06	0.000650691729130828
Ruvbl2	391.119216258315	-0.844942989896761	-0.897293998371688	0.181630312384577	-4.65199326480104	3.28741819167928e-06	0.000748846468912944
Cgnl1	235.629402056775	1.1952146682834	1.37389264164758	0.260288415751465	4.5918857542421	4.39258819688277e-06	0.00099027957411786
Stxbp2	123.015005917589	-1.42197307253227	-1.7793736161098	0.309833833039759	-4.58946997034309	4.44372918540264e-06	0.000991586426799846
Pcgf2	172.080659841563	-1.01929765399071	-1.12134269871013	0.222737333105585	-4.57623174246918	4.7342609658754e-06	0.00104574564446226
Gm26673	83.52434110376	1.30727748626646	1.56401843175612	0.28603763136466	4.57029894993032	4.87028960804257e-06	0.00106503493148675
Ppp1r13l	24.3182935530807	-1.72790306095674	-2.91540768925301	0.378398800488907	-4.5663544882389	4.96279251511657e-06	0.00107451828436207
Sh3bgr	87.6420343135902	1.21574714488261	1.4103180856909	0.266408884707223	4.5634632126428	5.03166298527626e-06	0.00107874908001982
Rps28	36.1284217404323	-1.50488132541247	-1.99915745375241	0.332456879950244	-4.52654589562922	5.99555828888994e-06	0.00127292105496549
Snrpa1	329.834381188923	-1.04311157374678	-1.15824581720167	0.231676576798872	-4.50244728301709	6.7175420573393e-06	0.00141249240105669
Nr3c2	113.342701269073	1.17743642311467	1.35628500868144	0.261774814674731	4.49789802956292	6.86285969942528e-06	0.0014293049134003
Inf2	58.1813075269649	-1.65823164052064	-2.57503888576805	0.36891684568552	-4.49486560430528	6.96139004336771e-06	0.00143614790064495
Mybl1	1181.34828799666	-1.16598171704702	-1.33942994216786	0.259888242703128	-4.48647351230479	7.24117148696143e-06	0.00147990596333526
Dmbx1	10.0793786515239	-1.72624380639395	-3.85406819406303	0.387268065098543	-4.45749072016741	8.29246257683248e-06	0.00167907010768678
Triobp	29.8928872181913	-1.58660113786438	-2.29840175790881	0.356331890437618	-4.45259372074682	8.48391897536017e-06	0.00170207651516676
Aldh4a1	102.393952731442	-1.28669571242234	-1.54760409802282	0.289197505903398	-4.44919366922942	8.61932684870671e-06	0.00171253341874568
Hecw1	682.206148408048	0.800075695205586	0.848656595488638	0.179898475257827	4.44737340913498	8.69266551494284e-06	0.00171253341874568
Gm11974	48.9104710491654	-1.36710499950642	-1.70187166151236	0.307567096033422	-4.44490004664823	8.79327400448934e-06	0.00171688674937654
Smim1	99.7936084197258	-1.31439000269839	-1.6072192759188	0.2979878230608	-4.41088494555768	1.02949011830617e-05	0.00199229114222295
Mdp1	226.675784919543	1.01192672736621	1.12315426858692	0.231284477145097	4.37524705443755	1.21295022093606e-05	0.00232673644135349
Trp53	123.10195736001	-1.26304133215539	-1.51725021157858	0.289070935061713	-4.36931278437156	1.24638139703911e-05	0.00237007551221314
Tuft1	27.8102441353364	-1.68370956059317	-3.28803787172367	0.386317912107255	-4.35835229955818	1.31045315753067e-05	0.00247043014214488
Glb1l2	14.0556130871278	-1.68410777498613	-3.49918084619611	0.387080885290579	-4.35079033603502	1.35647711660438e-05	0.00253066055755953
Cercam	158.08094763561	-1.04395896564067	-1.1703023849964	0.240027595505843	-4.34932893211964	1.36554758456203e-05	0.00253066055755953
Mmp2	103.930728015097	-1.6050406053117	-2.50324928545947	0.369875776182472	-4.33940449379383	1.42869340282366e-05	0.00262543422965948
Fam110a	61.128777269838	-1.61226874877659	-2.54917968197055	0.372101429572409	-4.33287437414387	1.47175098813742e-05	0.00268202088404909
Bcl11a	16.1126530992195	1.66504130249056	3.27030831207591	0.385148736710704	4.32311245964496	1.53843262107436e-05	0.00278036731881438
Baiap2	169.727548780605	-1.15847281086735	-1.3463749128023	0.268237728812314	-4.31882873448401	1.56859444959641e-05	0.00281164126424379
Pdk1	169.19145950514	1.10738490788965	1.26708058456975	0.256647877663047	4.31480251453135	1.59745643699192e-05	0.00284009572066173
Smad3	16.6236581943566	-1.64137761395267	-2.92364583602233	0.381939669738801	-4.29747874860753	1.7275181703298e-05	0.00304656188296549
Glrx3	1112.1004852626	-0.809471200589956	-0.864669280952108	0.189282672613547	-4.27652034606797	1.89837214304661e-05	0.00332108816193146
Casq2	12.0758424069558	-1.64006335739746	-4.80352007384829	0.383790660299802	-4.27332795466233	1.92576886844258e-05	0.00334227885834145
Ckap2	28.5384676999954	-1.60854688149334	-2.69362128499666	0.376916852258347	-4.2676438367123	1.97548395232042e-05	0.00340156559601126
Cav1	22.3950357493897	-1.59170258956351	-2.61133851600678	0.374463120554728	-4.25062576844836	2.13174092644296e-05	0.00364194613901989
Colgalt2	10.8647804718501	1.63750184469491	3.48313373282788	0.386708748304097	4.23445772012176	2.29103882090504e-05	0.00388375480120553
Apoa1bp	398.345359775603	0.874650680953755	0.948083880982578	0.207043788356459	4.22447197231489	2.39501654586833e-05	0.00402878629423451
Tcf7l2	73.3322464618972	-1.23300298438382	-1.49108395032703	0.292313770721942	-4.21808039128164	2.4639097886705e-05	0.0041130365846295
Card10	54.9525948477503	1.38595434631125	1.82131574093164	0.32888256938467	4.21413135060435	2.50741337322526e-05	0.00415394815497651
Trim47	14.1184714264362	-1.60726313017922	-5.03236869602673	0.3817782908404	-4.20993851337431	2.55440196711191e-05	0.00419997460276715
Anxa3	12.4355946373794	-1.62368316603675	-4.10678771014172	0.386040700949828	-4.20598958099957	2.59942208769832e-05	0.00424210165774529
Stx4a	210.304025449457	0.997885580329425	1.11531842482192	0.237477996029665	4.20201280545071	2.64552164792252e-05	0.00428535314050145
Pld2	43.7664249380473	-1.49455641527977	-2.15452862139235	0.356232958225176	-4.19544677372344	2.72334236737355e-05	0.00437897433012682
Rph3a	1568.23329808188	0.843845253121268	0.910214367639513	0.201364897872117	4.19062737368048	2.7818419521671e-05	0.00442225764566921
Kcnv1	27.2283942054589	1.46323768407774	2.07087105004969	0.349239300885822	4.18978528580928	2.79218535747731e-05	0.00442225764566921
Rprm	118.224907332163	-1.32982166564839	-1.69271391106195	0.317511204643786	-4.18826689010961	2.81092835535038e-05	0.00442225764566921
Gys1	456.31042368544	-1.13971088383372	-1.33389223910499	0.272885647382312	-4.17651457585451	2.96009783082097e-05	0.00462367281174235
Tcirg1	101.907367095437	-1.41649410098453	-1.91547888174343	0.339420779804034	-4.17326865433033	3.0026053345517e-05	0.00462712908344277
Trpm2	93.6015298992802	1.02277034331765	1.15353156385667	0.24508557646371	4.17311519541459	3.00462927496284e-05	0.00462712908344277
Brdt	80.7979699600591	1.2439810420932	1.52358328335431	0.298899797853043	4.16186645500782	3.15656942231712e-05	0.00480568921693934
Trim9	356.791016526802	0.805859952059954	0.863766879260363	0.193656215455497	4.16129144197359	3.16452920815467e-05	0.00480568921693934
Mum1l1	105.12551533264	1.04711773834928	1.19119817475084	0.252164983393839	4.15251048839663	3.28847677230643e-05	0.00495947655564117
Lhfpl1	15.3387981555975	-1.59245431846249	-4.35197367919512	0.38390922453153	-4.14799701779945	3.35396767007583e-05	0.00502360034309714
Lrrc49	724.066054936611	0.775630165618743	0.827313466934599	0.187450467938108	4.13778730002871	3.50671216883226e-05	0.00521665181687237
Mief1	181.73922067027	-0.983269121369805	-1.09963845930175	0.238011004423884	-4.1311918486704	3.60887229896675e-05	0.00533235266444627
Mapk11	109.170534230887	1.17031852957959	1.39563495778517	0.28435093229292	4.11575414978421	3.85915491088179e-05	0.00566389259001094
Carkd	188.656364148001	0.975978338742591	1.09041145768807	0.237273636079668	4.11330291417161	3.90038044436797e-05	0.00568623463716258
Slc26a9	12.3269701297141	-1.56951584842177	-4.83193312573607	0.381845140448688	-4.11034653099816	3.9506578232031e-05	0.00572138975349705
C920021L13Rik	66.743487561307	-1.11849294883393	-1.30818031011568	0.272703611075327	-4.10149665574092	4.10486440780105e-05	0.00590560360985482
Sema7a	201.527012417332	0.846177786259906	0.91714878076096	0.206725181277885	4.09324970005687	4.25369214316499e-05	0.00605254964504255
Sag	13.5055319298205	-1.56943422189404	-2.90902753842683	0.383464299736556	-4.09277792736443	4.26235890495954e-05	0.00605254964504255
Ctxn1	536.748446512099	-0.890598735580235	-0.976366533146341	0.219167883424299	-4.06354581549742	4.83328300793414e-05	0.00679307296829381
Abcd2	167.844554066798	0.935207687117606	1.03702850800532	0.230253740463729	4.06163949925029	4.87292859416019e-05	0.00679307296829381
Dcaf4	172.105373451021	-1.01456882253211	-1.14992428240914	0.249805053030883	-4.06144235363679	4.87704616801778e-05	0.00679307296829381
Aifm3	402.122564824564	0.870388916312768	0.94983780949336	0.214423499610363	4.05920488143503	4.92400964200705e-05	0.00681507866148166
Resp18	3073.442582024	0.715525464169947	0.757296869138559	0.176825223243269	4.04651243214073	5.19863649551643e-05	0.00714992345182096
Arhgef5	11.8299114456052	-1.55552363298727	-3.05406709025023	0.38581122198845	-4.03182578508264	5.53452085133801e-05	0.00756430637356622
Fgfbp3	13.0981465600573	-1.53255387167936	-2.75903609402027	0.382296919248313	-4.00880518392021	6.10267349212868e-05	0.0082890226040913
Elk3	29.4828027920796	-1.47162578020201	-2.25846804938817	0.367401622933532	-4.00549613377251	6.18874461499017e-05	0.00835404118769167
Cflar	69.7061791916599	-1.4164587172373	-2.02864985418058	0.354283438864538	-3.99809463794577	6.38544218017784e-05	0.00856667788933307
Hs3st6	11.2199967456656	-1.51371881388755	-4.68837536361321	0.381082357589841	-3.9721566316034	7.12248602258002e-05	0.00949722709401096
Gm26614	20.3526585750032	1.4076554230188	2.03941549323063	0.354702003879417	3.96855785313617	7.23089037465785e-05	0.0095833400432132
Ddx26b	104.270707699023	1.13656452106872	1.36059482260932	0.286793316905706	3.96300908728084	7.40109634159321e-05	0.00974982980710604
Cpne6	1623.99768598147	0.73580764761061	0.783846513945952	0.185784127709666	3.96055172571305	7.47767926012391e-05	0.0097917299437359
9530059O14Rik	129.262619089755	1.15749160154318	1.40209312917807	0.293565672464607	3.94287108511549	8.05119377892686e-05	0.0104799705689031
Fcgrt	14.9960747986461	-1.52037605498529	-3.74633274635815	0.385790710350232	-3.94093484937739	8.11646705008845e-05	0.010502420204221
Dkkl1	35.3843227291581	-1.4133666825675	-2.08194093420335	0.358903472133622	-3.93801339999657	8.21590073539199e-05	0.0105685480753854
C1qtnf1	14.2810656148939	-1.49337388114688	-4.58615484876511	0.380157032217527	-3.9283079216916	8.55456356541896e-05	0.0109398360262329
Mdm2	259.730566779073	-1.02041705396979	-1.17239060656134	0.260126435767321	-3.92277336580483	8.75354850799836e-05	0.01112922085889
Cryab	406.572802441094	-1.05261767015801	-1.22360951709401	0.268616638829668	-3.91866146022875	8.90420739965078e-05	0.0112553299084141
Lepr	23.9215391809181	-1.48256107292673	-2.49791775503834	0.378480824474575	-3.91713655502863	8.96069953493536e-05	0.0112616423810325
Fgfr3	67.9273317946088	-1.3446828723501	-1.8476463646161	0.34374537934097	-3.9118573024258	9.15890261821128e-05	0.0113564387038291
Gm26724	13.5242543832567	-1.50048722382352	-4.02271848279236	0.383597719347189	-3.91161664458555	9.16803578023105e-05	0.0113564387038291
Ass1	82.0451877388165	-1.16700524600477	-1.42733019977867	0.298391393058486	-3.91098829642193	9.19192267504002e-05	0.0113564387038291
Abcg2	83.9544640920229	-1.26648100182869	-1.63833775662042	0.324116687095715	-3.90748471847326	9.32619380301676e-05	0.0114575958474365
Rtel1	112.279282772075	-1.12601057661461	-1.35359777502213	0.289502245261536	-3.88947096281542	0.000100462987793222	0.0122733218830289
Hspb6	210.335193987757	0.882666966567076	0.975768237988787	0.227439060238148	3.88089436195721	0.000104073041427359	0.0126437181662971
Necab3	308.504159833045	0.944432036160864	1.06330628265214	0.243972765973855	3.87105516630522	0.000108365262236971	0.0130924395281662
Fam43a	50.108712988887	-1.30172393172583	-1.75097927844069	0.336844908005899	-3.86446076751451	0.00011133488222684	0.0133773143106403
Kcnq2	621.43967392948	0.647314924890951	0.680914606276008	0.167751223611384	3.85877915496184	0.000113954853539856	0.01356572174206
Tubb6	81.039277785036	-1.1779433136145	-1.46076280828077	0.305295220787778	-3.85837456143258	0.000114143625413345	0.01356572174206
Rab24	375.998219090911	0.682147359020139	0.722127920363218	0.177109880424962	3.85154886550302	0.000117373102497778	0.01387413516444
Cstf2	166.404368436481	1.00629123374559	1.15857481278221	0.261538736035024	3.8475800908162	0.000119290285771596	0.014024946071254
Gtse1	42.7836460487015	-1.48850714617392	-3.11048502519377	0.387250980840306	-3.84377889229348	0.000121154171239131	0.0141679113190231
AI848285	35.9070221047354	1.31117805065272	1.79609081335194	0.34162372697568	3.83807665310688	0.000124001776604805	0.014423781121244
Susd2	2131.58640691004	0.604096396843286	0.631428466524875	0.157629995345796	3.83236956594505	0.000126914892157711	0.0145586119542429
Clmp	251.889073193943	0.913602636385353	1.02207805027746	0.238479176206619	3.83095350679091	0.000127647626384793	0.0145586119542429
Ldlr	273.37597278175	1.16134301580137	1.43338185385787	0.303297203676017	3.82905942331708	0.000128633947083501	0.0145586119542429
Cdc34	340.90125389463	-0.706568714708571	-0.752078883525825	0.184562763249271	-3.82833840515421	0.000129011292451074	0.0145586119542429
Hrk	159.876169273791	1.05739325872731	1.24394931061416	0.276215796638277	3.82814187890941	0.000129114325380417	0.0145586119542429
Slc15a4	111.296189820758	-1.11666163936404	-1.34681635875134	0.291704050570858	-3.82806353624077	0.000129155419751378	0.0145586119542429
A830018L16Rik	194.577335474452	0.92209396654999	1.03559325139997	0.241756439179356	3.81414439127265	0.000136655556056826	0.0153046489555469
Srsf2	128.613185696542	1.16880255953451	1.45310078151432	0.30673598709932	3.81045136107898	0.00013871330240968	0.0153046489555469
Rasgrf1	526.940426621315	0.763979340863819	0.823502228836991	0.200514916659173	3.81008731715655	0.000138917719467715	0.0153046489555469
Pacsin2	188.719362340732	0.982930956145065	1.12648590516639	0.258010414853693	3.80965612067422	0.000139160210962195	0.0153046489555469
Hopx	106.619237646137	1.14670924695622	1.40939499499883	0.30109529075141	3.80845958797464	0.000139835193688398	0.0153046489555469
Gata6	33.7354724674363	-1.41616698160442	-2.23739164531254	0.371871500929573	-3.80821595111322	0.000139973010385466	0.0153046489555469
Armc9	129.073311339639	0.953294772795789	1.08289761219235	0.251012823149701	3.79779312002421	0.000145990088706187	0.0158323075688906
Thbs2	14.4094711316945	-1.46731576752728	-2.86436134925638	0.386410734711256	-3.79729556070363	0.000146283333385378	0.0158323075688906
Amdhd2	53.2718778642471	1.21504087172311	1.56047160343147	0.320073339303812	3.79613270622892	0.000146970844909676	0.0158323075688906
Fam83h	13.4690662205416	-1.46817903086611	-3.27898567889186	0.386935256203518	-3.79437905263894	0.000148013409287384	0.0158664570308652
Trappc2l	658.182348167951	0.769388936410314	0.831085944692742	0.203042441371281	3.78930105062823	0.000151071744410839	0.0161153019842743
Fasn	690.705492019945	0.837717612590288	0.920255906265916	0.221271964658812	3.78591844602636	0.000153141897356272	0.0162568301523638
Eps8	98.3888499680554	-1.01143227306507	-1.17448691785438	0.267269119921047	-3.78432148601325	0.000154128488658711	0.0162825207245831
Cabp7	500.757851662286	0.829759575877574	0.90987977681424	0.219348874607642	3.78283033073133	0.000155055113042776	0.0163016596731703
Pon2	31.8651325489884	-1.40027425943692	-2.18603392716398	0.370311041642941	-3.78134622512034	0.000155982561168645	0.0163207016633298
Ahcy	11.9356543197294	-1.45643352405405	-2.90645435376155	0.386343367059136	-3.76979042021737	0.000163384688940241	0.0169815497123121
Hist1h1c	131.372938529055	-1.06700580836796	-1.2691217075467	0.283094639281482	-3.769078111391	0.00016385160916855	0.0169815497123121
1700066M21Rik	139.811095925534	0.98326832402461	1.13231965705155	0.261640797953273	3.75808486947137	0.000171218812077379	0.0176613819929629
S100a16	92.8499104010247	-1.14397939943243	-1.41419473931513	0.304500511627017	-3.75690468735137	0.000172027978999596	0.0176615391772919
1110008P14Rik	3049.42898309211	0.651553161179503	0.68815792663837	0.173822335779087	3.74838571958652	0.000177976399086787	0.018186859323504
0610011F06Rik	182.728064520229	1.1368392240262	1.40350746150104	0.303526623611163	3.74543494900323	0.000180081506474162	0.0182434626578943
1700012B15Rik	147.242445417856	0.932128217559847	1.05578945919046	0.248907915999769	3.74487172822865	0.000180485964929284	0.0182434626578943
Tspo	80.3472343667464	-1.23340143991698	-1.61965135258302	0.329424313674603	-3.74411173892678	0.00018103308015196	0.0182434626578943
Ddit4	59.4700201710105	-1.11532037964038	-1.36544187892918	0.298634173992844	-3.73473793949351	0.000187910756803419	0.0188420993216732
Slc38a2	567.076469276696	0.829647133143151	0.912248365472436	0.222205840027461	3.73368734611395	0.000188696714443316	0.0188420993216732
Matn2	116.068281740914	1.14601191032739	1.42710074116753	0.307325795765324	3.72898053504916	0.000192256000537989	0.0190780533142562
Rspo2	311.322037032472	0.838754507766849	0.924855847960451	0.224971960258862	3.7282624323571	0.000192804544652031	0.0190780533142562
Ifi35	18.2461890370647	-1.4385530913723	-2.79567435438897	0.386080791466238	-3.72604160364734	0.000194510313441255	0.0191139191470347
Gtf3c5	100.728876185954	-1.13871829482461	-1.41142521812647	0.305653744135994	-3.72551724515424	0.000194915125744866	0.0191139191470347
Tnfrsf22	23.1233402580748	1.41582330791019	2.4794862084047	0.381010766165411	3.71596666981198	0.000202428267946363	0.0197620596582637
Aox4	11.6178340941105	-1.42673812851499	-3.6533446393886	0.3842874306585	-3.71268486734054	0.000205072166404543	0.0198946066455925
Nrf1	60.7708267935432	1.16658755461074	1.47627187448135	0.31435598621724	3.71103973125727	0.000206409700389804	0.0198946066455925
S100a11	152.97594842491	-0.889195244905908	-0.996144408304831	0.239616473528428	-3.71091032186656	0.000206515260131219	0.0198946066455925
Clic1	233.617898859093	-1.00212592497405	-1.16781993979946	0.270374722015915	-3.70643349164519	0.000210198402076242	0.0201606081429967
Gm1673	619.014913459583	0.631952844413125	0.666126886862166	0.170876868990763	3.69829367863292	0.000217053675215141	0.0207272042340817
Col18a1	25.5033623157409	-1.42141509195509	-2.64766649097601	0.384499871140678	-3.69678951448863	0.000218343228090236	0.0207596943994664
Dync1i1	560.485703541206	0.767813222114441	0.833294265412943	0.208399737097194	3.68432913020589	0.000229305788471173	0.021686344709247
Inadl	281.453833451678	0.962580544533014	1.10808983993962	0.261339429074708	3.6832580064214	0.000230271881992482	0.021686344709247
Gm26703	13.2676809068019	-1.39189238179128	-4.50269039775021	0.377986922999433	-3.68238237118421	0.000231064492283453	0.021686344709247
Gsta4	355.169730960177	-0.725446651049277	-0.779649267467929	0.197125571723312	-3.68012452523168	0.000233120085256931	0.0217857693350367
Guf1	159.831735934204	1.03088810130779	1.22202273184751	0.281075372468707	3.66765715634714	0.00024478309940378	0.0227291536903099
Tcea3	39.4272006095365	-1.39928335596977	-2.43794326216711	0.381575111489954	-3.66712427995087	0.000245293592048342	0.0227291536903099
Arl16	303.141374043139	0.690724871876481	0.737317600417973	0.188445447200396	3.66538370726437	0.000246968018204567	0.0227877494603269
Tnfaip8l3	65.5672452122845	1.0227591952162	1.2104197543484	0.279556465153812	3.65850668004933	0.000253689129737792	0.0233031839700399
2410124H12Rik	11.2930399535401	-1.3752919239956	-4.68396962361923	0.376019475373279	-3.65750184250518	0.000254685429341482	0.0233031839700399
Arpp21	460.803458580749	0.810207895416093	0.890358359103378	0.2216533690258	3.65529249105068	0.00025688892565965	0.0234068626096884
Mgarp	32.2776708934031	-1.39291568519826	-2.4338802132564	0.381383449038762	-3.65227093286026	0.000259931429720352	0.0235858112245836
Tmem19	335.435303598726	-0.799517018698426	-0.87663439641078	0.219216210167751	-3.64716194156723	0.000265152822987736	0.0239601732772554
Afap1l2	10.5076967981317	-1.40832404078106	-3.36721145082449	0.386329655791848	-3.64539459932078	0.000266981823731781	0.024026166754595
Enc1	154.336178954953	-1.1240839924936	-1.40224068580542	0.308738894827608	-3.64088882653174	0.000271698446150607	0.0242556804983837
9530077C05Rik	64.0576776941271	1.11651136130459	1.389090086725	0.306663169857898	3.64083943246904	0.000271750581768063	0.0242556804983837
Gpam	10.0158586634227	1.39127858783348	4.00876924568378	0.382285849898122	3.63936721226864	0.000273308827309881	0.0242955993317581
Gabrb3	522.498245735678	0.645670339911085	0.6837536112963	0.177597682980585	3.63557862397152	0.000277357382583866	0.0245556730459271
Arsg	29.285723465457	1.29379733685871	1.87620059259499	0.356191896139351	3.63230424633958	0.000280901651881694	0.0247691827554391
Ppp1r1c	308.69564118316	0.985222751091343	1.15049636599152	0.271455895849068	3.62940266229891	0.000284077823587862	0.0248257234379047
Rps15	432.359843435157	0.670515927650827	0.713763875199814	0.18477980567236	3.62872947728792	0.000284819508186385	0.0248257234379047
Ccdc81	25.5006804244749	-1.40489800382482	-3.00116374748364	0.387279756893866	-3.62760505504509	0.000286062392891999	0.0248257234379047
Hs3st4	170.025323237835	-0.960627191538928	-1.11046299208904	0.264865351787605	-3.62685109643654	0.000286898628104537	0.0248257234379047
Nup62	104.422798854858	-0.869840645129011	-0.974754287361163	0.239852644010006	-3.62656267025652	0.000287219134341956	0.0248257234379047
Mab21l3	11.6660048228577	-1.36638219440881	-4.37898496385082	0.377635448871433	-3.61825723324508	0.000296593530866145	0.0255350682400821
Slco3a1	164.438319759156	0.773654199789266	0.843997718046282	0.213916145967551	3.6166236834999	0.000298470733935325	0.0255959137635204
Rnf139	221.694111145561	0.850045698899187	0.947622597256315	0.235205865660187	3.61404974537195	0.000301451184694704	0.0257505254175929
AA986860	25.756874853672	-1.35976501355398	-2.26516196131672	0.377354460962288	-3.60341576481288	0.000314062558784872	0.0266593682462461
Pdcd2l	91.4243371017965	0.88539779823765	0.999194169573449	0.245768390486758	3.60256986866404	0.000315086671897854	0.0266593682462461
Tor3a	25.735826574564	1.3192179742796	2.02288982864913	0.366243422783811	3.60202502546597	0.000315747959382556	0.0266593682462461
Neil2	17.8225246106934	-1.33151009103948	-2.09372051878622	0.370367490722534	-3.59510519792623	0.000324260523329026	0.027272804323689
Mis18a	19.0238579059625	-1.39059297833513	-2.89840899819838	0.387276949886174	-3.59069389165517	0.000329798786059292	0.0276323366036191
Mir9-3hg	57.9861151859163	1.09224922545236	1.3532417225875	0.304443896069476	3.58768639987153	0.000333625214668512	0.0278462450166833
Trp53inp1	59.5606861200169	-1.31090266042033	-1.98920210896653	0.365875500820871	-3.58292003011739	0.000339774651670313	0.0282320607946541
Slx1b	50.9471920369108	1.21003081505474	1.63304699048911	0.337798304369149	3.58211038777865	0.000340829707782544	0.0282320607946541
H1f3	19.2987649077427	-1.38340161442664	-3.14337077026925	0.386877855620055	-3.57580976613262	0.000349145481386017	0.0288117486299978
Igsf10	27.6205198346833	-1.36404625281571	-2.3568081074732	0.381689361895043	-3.57370780794986	0.000351961672435348	0.0289349543338954
Carmil1	115.062332955942	0.902911262080053	1.02820576273847	0.253006069248765	3.56873360690916	0.000358710927485922	0.0293793654017308
Blvra	172.360557537149	0.926589480443833	1.06434994250461	0.259911146323171	3.56502402283171	0.000363822863343807	0.0296868596104566
Mtap	568.6381383019	0.69063650227026	0.740847699184589	0.1946756052484	3.5476273536637	0.000388717773131949	0.0316002983749051
Celf5	99.1636520650004	-1.02246128750465	-1.22745341906045	0.288292539435482	-3.54661029212471	0.000390221363879597	0.031605039945626
Phka1	100.679562575817	0.92011292704986	1.05691906844504	0.259681259925552	3.54323961349251	0.000395243407969019	0.0318936636364078
Lrrcc1	205.390378031495	0.940839325669691	1.0896465418468	0.265723229120529	3.54067398918645	0.000399106391980491	0.0320869800729021
Mdga2	23.9223550235757	1.34583487219748	2.32883762739175	0.38043776988614	3.53759531447224	0.000403788416719681	0.0323444875341611
Mirg	162.004119244071	0.882482128470608	1.00073125739797	0.249893074725159	3.53143891418837	0.000413305312264537	0.0329859874766456
Mapkapk3	18.2712461292535	-1.36470667731224	-2.65689901399631	0.386688351138981	-3.52921590033042	0.000416792949002295	0.0331433753046625
S100a3	9.98899753905054	-1.32186462238358	-4.50526069935421	0.375035365796268	-3.52463992182983	0.000424058791214228	0.033598976979249
Mvb12a	104.368179007432	0.892939194532895	1.01750339528205	0.253468212300198	3.52288433500029	0.000426877612462517	0.0337002152683405
Scmh1	123.515402214312	1.05235384804965	1.28873185780228	0.299277848029248	3.51631052875922	0.000437588860319694	0.0344215582642844
Tesc	647.575718991436	0.761748343562173	0.833607817924428	0.217335196885165	3.50494698732422	0.000456698211927001	0.0356045073365438
Pah	19.7458692661485	-1.33136843147355	-2.27074618440562	0.379895087665291	-3.50456869462488	0.000457347559720486	0.0356045073365438
Exoc4	319.204409437641	-0.759367209174459	-0.83050679989256	0.216685128032577	-3.50447313144764	0.000457511732283191	0.0356045073365438
Prpsap1	428.749240879243	0.648524877083493	0.690748298975979	0.185545136864576	3.49524050073505	0.000473634767982582	0.036728528745543
Lratd1	140.038992266674	0.975101173777963	1.15254511997741	0.279322706584938	3.49094846494855	0.000481309083867753	0.0371917563463605
Septin4	621.607632462554	0.738648843501228	0.804049716239375	0.21170927933156	3.48897717583943	0.000484872548174347	0.0373351862094247
Htatip2	137.482761892389	1.03989299037895	1.27081367065961	0.298224052023552	3.48695211980027	0.000488558815996325	0.0374870322393251
AI480526	76.213154434104	1.04978048702768	1.2919559969075	0.301514947690513	3.48168638095256	0.000498266890338625	0.0380047852235787
Apobec1	11.7957361428539	-1.32551128584841	-3.69187580024169	0.380739842468308	-3.48140945075571	0.000498782392498952	0.0380047852235787
Robo3	60.9852755464078	-1.29340209032971	-2.03795998334741	0.371652171909462	-3.48014134744461	0.000501149309606737	0.0380525454947227
Gm26538	9.64439331219609	1.3460591338798	3.05135726898904	0.387133381976543	3.4769906098187	0.000507075576443886	0.0383693034798439
9330133O14Rik	9.87185490191753	-1.34560891042724	-2.99130299782105	0.387136986496252	-3.47579528012953	0.000509340934141157	0.0383772332962079
Necab1	82.8797559111003	1.08673618664163	1.37009981515415	0.312722130398236	3.47508564634592	0.000510690272964903	0.0383772332962079
Jph3	409.102985449085	0.68994328521086	0.742597585626399	0.198707652631198	3.47215256219346	0.000516302836276376	0.038564550441468
Ost4	227.339110895996	0.890758221834281	1.01863933892317	0.256559149853162	3.47194096310381	0.000516709954241363	0.038564550441468
Cfap20	271.215406194017	0.811441172919545	0.903161132796767	0.233907990370075	3.46906136740233	0.000522280140405621	0.0388476942530276
Uspl1	266.702990069533	-0.859745339399919	-0.973156758304473	0.248699354659258	-3.45696650712204	0.000546292741877819	0.0404888512123558
Areg	36.9157038196949	-1.22623152110374	-1.75899531804381	0.354801863690743	-3.45610225478569	0.00054804737327864	0.0404888512123558
Kcng4	247.842580545464	1.03341755103339	1.26483972613284	0.299198811215311	3.45394938848777	0.000552441041397178	0.0405957483557378
Vsig8	24.4071135251446	-1.2435018363357	-1.83638252094464	0.360062138585925	-3.45357565563352	0.000553207106731747	0.0405957483557378
Lypd1	272.142430461786	0.767942465817931	0.844720680998966	0.222503592998127	3.4513710788679	0.000557746146610702	0.0407919489434209
Caskin2	8.17827194431933	-1.29971351070676	-4.20178618819603	0.376787926071678	-3.44945636729217	0.000561716500215954	0.0408930449391143
Fxyd7	5333.58774225374	0.665748745655587	0.713202639737805	0.193032017630859	3.44890321215374	0.000562868416255414	0.0408930449391143
Snhg11	7652.70720284158	0.725180066655087	0.788591500091831	0.210612770198143	3.44319134102288	0.000574892413910507	0.0416283023423674
Bche	217.875999030724	-0.91898848228096	-1.06685125054619	0.267261177212817	-3.43854087550164	0.000584858233859983	0.0422101645480201
Smug1	71.9660453319998	1.04124506103313	1.28511153430765	0.302978909203503	3.43669156302147	0.000588865770586801	0.0423595943131321
Laptm5	11.085462230464	-1.33000797569734	-2.89032932280682	0.387249356572145	-3.43450015636001	0.000593647729520239	0.0424630429206203
Lrrc3	69.4540330160835	-0.969013701896245	-1.15045421322992	0.28217150549291	-3.43413024714713	0.000594458480651347	0.0424630429206203
Tbc1d8	63.8803921647366	-1.18432119408317	-1.62931313540287	0.34494429354867	-3.43336943452309	0.000596129238002123	0.0424630429206203
Dhps	217.500186414778	0.887285272768834	1.01740276149648	0.25860279364841	3.43107381111732	0.000601196993933212	0.0425648553726354
Fam81a	86.5542145795634	-0.929516889871886	-1.08512566191057	0.270920428969645	-3.43095902146248	0.000601451450070621	0.0425648553726354
Carhsp1	121.044696471986	-1.20675935135991	-1.70760409088321	0.351883879359643	-3.42942493857907	0.000604861712354909	0.0425755179115317
Gabra2	108.290482411408	0.90235161523842	1.04132772190678	0.26314221117832	3.42914050618408	0.000605495979078396	0.0425755179115317
Chrnb3	10.1580147025211	-1.2842324917269	-4.27180715168476	0.374715451519574	-3.42722053899563	0.000609793605290897	0.042727187140852
Pdgfd	68.0347073744256	1.11306692952626	1.44398945617031	0.324846966422814	3.42643473566416	0.000611560708573563	0.042727187140852
Atp11b	329.729080146785	0.889382296281573	1.02120872045401	0.259633556653321	3.42552907161047	0.000613603263517859	0.0427333635879253
Htra1	736.324228054993	0.853435011487213	0.967040851460558	0.249335354116856	3.42283995187956	0.000619705536215064	0.0430213354474636
Cln8	59.6344609291384	-1.0588580506881	-1.32356040362971	0.309590154558047	-3.42019290697298	0.000625767438152898	0.043304209674192
Adgra3	43.4908118134931	1.29580229595744	2.19092804059855	0.379030786524408	3.41872571312619	0.000629151123745803	0.043304209674192
Pacsin3	45.2109918062256	1.11325350975922	1.44798376883455	0.325657522086697	3.41847933567109	0.000629720993067178	0.043304209674192
Trap1	322.612552926097	0.692360913552253	0.747807615327625	0.203012209317705	3.41043977541637	0.000648582062689832	0.0444614186423236
Tmem186	77.9559792435095	0.956637564082285	1.13420373775504	0.280835321990549	3.4064004388824	0.000658255539445552	0.0449835379268604
Anxa8	8.37414005264186	-1.30927020970188	-3.3343073446821	0.384664150146294	-3.40367099248512	0.000664867841793901	0.0452938628172867
E4f1	127.82424777565	-0.833455833589068	-0.939591795164843	0.245296849676681	-3.39774373249237	0.000679440341293375	0.0461428614391414
Fads6	40.8035833849824	1.07585840503522	1.36974608551565	0.316795205259586	3.39606909187166	0.000683611013230061	0.0461843056573991
L3mbtl4	9.82564566897266	1.31287704704336	2.65920414838217	0.386666814074521	3.39537037898043	0.000685358174809414	0.0461843056573991
Greb1	54.5697902098954	-1.22461924531704	-1.80055955654859	0.360752005217787	-3.39462907372542	0.000687216377653814	0.0461843056573991
Gm26656	32.7511344687907	-1.30052213295983	-2.3301316009745	0.383179193881047	-3.39403118365441	0.000688718497291029	0.0461843056573991
Gm26666	14.6481421301865	-1.31100670882617	-2.5107642440717	0.386353839667766	-3.39327987513606	0.000690610387322549	0.0461843056573991
Fndc1	181.407895387663	0.999385402782232	1.21285420088579	0.294779446719679	3.39028183241214	0.000698208036119691	0.0464076920054606
Tmem175	110.792496978918	1.07816802776379	1.37476948816377	0.31804642966034	3.38997054271362	0.00069900134302912	0.0464076920054606
Stab1	15.9761192522501	-1.31237797259743	-2.85465069416118	0.387194405099182	-3.38945489736933	0.000700317283784617	0.0464076920054606
Mgam	7.28742479131988	-1.29895144493921	-3.3658564484002	0.383618940790147	-3.38604616931513	0.000709074528958488	0.0465412126719017
Lhx4	164.259607168566	0.842485509200465	0.953989561047898	0.248813214285219	3.38601593818369	0.000709152647935756	0.0465412126719017
B3galt5	284.327509771102	0.659878763679561	0.708007873565843	0.194910714464949	3.38554381420744	0.000710373681485659	0.0465412126719017
Dgkk	2178.59739319577	0.579063719942665	0.610452297093402	0.171049293420566	3.38536166015546	0.000710845300549441	0.0465412126719017
Hipk4	208.914879517587	0.817226712458783	0.917354889314274	0.241493726824721	3.38404944593834	0.000714251389809319	0.0466246250517916
Pard6g	58.1383009658735	-1.01812067285145	-1.25003798122087	0.301159193458778	-3.38067273045348	0.000723086107113458	0.0469054132585252
Ift46	424.060327081955	0.718054797354717	0.782156009106016	0.212425373860934	3.38026848819293	0.000724150529509764	0.0469054132585252
Il1b	9.12787910312965	-1.26141390316719	-4.36725085676267	0.373293378398192	-3.37914888439741	0.000727106195306232	0.0469054132585252
2310009B15Rik	68.2226451049514	1.03538152024353	1.28735352801607	0.30640395297997	3.37913891179863	0.000727132572463876	0.0469054132585252
Mrps35	299.316977138029	0.608113301297331	0.64512020006042	0.180116139129096	3.37622882789795	0.000734867726124399	0.0472649630437893
Bora	14.7779887061512	1.29278317958316	2.3670793011362	0.383618000548457	3.36997528201197	0.000751749266583872	0.0482089529667334
E230016M11Rik	48.2402761452106	1.16239900040075	1.61009855923689	0.345398412232488	3.36538605631556	0.000764366300167614	0.0488747434270918
Tecpr1	404.043771290487	0.620373595634373	0.660207451536057	0.184443275299988	3.36349262192056	0.000769628934656806	0.0489280044341172
Ccdc82	16.5092409716318	1.23946687534013	1.93258572603312	0.368507675074648	3.36347641901639	0.000769674114017575	0.0489280044341172
Yipf1	228.49210184685	0.910991259914684	1.06343638473279	0.271253828465743	3.3584457224711	0.000783821128011284	0.0496828997894225

[truncated: 9 more sheets: CN10_P2, CN10_P5, CN10_P10, CN12_P2, CN12_P5, CN12_P10, SC_P2, SC_P5, SC_P10]
