# Supplementary material for: LCM-seq reveals unique transcriptional adaptation mechanisms of resistant neurons and identifies protective pathways in spinal muscular atrophy
Source: Genome Res. 2020 Aug;30(8):1083–96. doi: 10.1101/gr.265017.120 (PMC7462070; doi:10.1101/gr.265017.120)
Supplement: Supplemental Material [file supp_gr.265017.120_Supplemental_Table_S6.xlsx]

## Sheet: Content
This file contains:
	Supplemental_Table_S6	Gene lists from Venn diagram in Fig. 3B. Overlap in differentially expressed genes (SMA versus control) between somatic motor neurons from all time points combined.

## Sheet: Table_S6
Gene lists from Venn diagram in Fig. 3B. Overlap in differentially expressed genes (SMA versus control) between somatic motor neurons from all time points combined.
Cell types	CN12, CN3/4, CN7, SC		CN12, CN3/4, CN7		CN12, CN3/4, SC		CN12, CN7, SC		CN3/4, CN7, SC		CN12, CN3/4		CN12, CN7		CN12, SC		CN3/4, CN7		CN3/4, SC		CN7, SC		CN12		CN3/4		CN7		SC
direction	up	down	up	down	up	down	up	down	up	down	up	down	up	down	up	down	up	down	up	down	up	down	up	down	up	down	up	down	up	down
N. genes	16	3	3	2	0	0	0	2	32	5	4	18	1	6	0	2	31	20	10	9	21	11	66	156	165	238	115	150	87	91
1	Cdkn1a	Smn1	Uspl1	Abcc5				Pmch	Btg2	Mapk11	Olfr920	Arglu1	Hacd4	Yipf1		Avp	Lepr	Card10	Iapp	Miat	Gm16630	Chrm2	Lars2	Strada	Prima1	Gm23347	Mastl	Ciart	Sesn2	Oxt
2	Dcxr	Snhg11	Snord13	Lratd1				Cstf2	Eda2r	AI480526	Snhg18	Nipsnap2		Guf1		Ssna1	Gpr179	Ncoa3	Rin1	Hapln1	Slc13a4	Entpd3	Gm15564	Sod1	Ttyh2	Myef2	C730034F03Rik	Ints5	Nfkbie	mt-Co1
3	Fas	Rph3a	Spc25						Cpne2	Lrrc49	Stum	Gm12940		Nmt2			Ephx1	Septin4	Rgs12	Mgat3	Colq	Chodl	Apol9b	Fgfr3	Nup37	Gm17066	Smoc2	Nfe2l3	Smad7	Pou4f3
4	Inka2								Ly6d	Necab3	Tshr	Hsf2		Cgnl1			Scn3b	Myl6	Hcfc1r1	Shisa4	Tsku	Mccc2	Yam1	Gm9958	Agt	Ubp1	Spata16	Myo15	Usp11	Haghl
5	9230114K14Rik								Ptk2b	Susd2		Actr2		Egfl7			2410124H12Rik	Fndc4	Eva1c	Ndufb10	Rab42	Abcd2	Ldb1	Ypel4	Arl10	Col5a2	Slc25a45	Cd53	Luc7l	Il23a
6	Gtse1								Tcea3			Magi1		Dlk1			Them5	Ptov1	Cav2	Abca2	Magt1	Ints6l	Acy1	Set	Sema5a	Klhl23	Tm4sf5	Gm14379	Zfp52	Smr3a
7	Ckap2								1700007K13Rik			Sirt6					Trp53inp1	Cuta	Efs	A530058N18Rik	B930036N10Rik	9530059O14Rik	Tubb2b	Alpk3	Etaa1os	Col1a2	3222401L13Rik	Fcrls	Mpzl3	Slc8b1
8	Plk2								Pidd1			Actb					Alox5	Shisa8	Ift27	Plekhd1	Stxbp2	Kcnq2	Orai1	Sec23ip	Syn1	Lysmd2	Areg	Adgrl4	Commd2	Fam72a
9	Ddit4l								Crip2			Tial1					H1f2	Lrrc20	Sf3b5	Etl4	Pcgf2	Prpsap1	Lyn	Pan3	Slc25a35	Pnn	Cidea	Plpp5	Zdhhc7	Nutf2
10	Snrpa1								Trim72			Micu3					Ctxn1	Slc38a2	Prpf8		Inf2	Fndc1	Rny1	Prps1l3	Bdnf	Arsj	Zfand1	Sla	Sox10	Twist2
11	Psrc1								Mmp2			Sema4b					Axl	Tesc			Smim1	Tmem175	Snord49b	Noct	Ccdc151	Gm17477	Ptpre	Irak3	Vipr2	Htr1b
12	Pmaip1								Ccng1			Gm2a					Cercam	Eral1			Trim47		Rtl5	Fry	Pwwp2b	Rbm26	Fap	Colca2	Vav2	Myg1
13	Gpx3								Tap1			Sdhb					Aldh4a1	Trap1			Rprm		Gm12913	Mrpl38	A2m	Pitrm1	Mipol1	Zfp358	Bcor	Snx6
14	Ccl17								Gjb5			Zscan26					Hs3st4	1110008P14Rik			Gys1		Srbd1	Ciao2a	Kcnq5	Flnb	Lmo3	AW146154	Wdr91	Plxdc1
15	Cox6b2								Prss56			Wtap					Dmbx1	Kcng4			Slc26a9		Gabrb2	4933434E20Rik	Gm10125	Tmed8	Tnfsf11	Sephs2	Ddx10	Ccdc74a
16	Ptprv								Tmem43			Bhlhe41					Mab21l3	9530077C05Rik			C920021L13Rik		Gm10287	Taz	Fkbp14	Msl3	Capn6	Ppp1r15a	Mt1	Ace
17									Robo3			Lgr4					Celf5	Sema7a			Dcaf4		Fam167a	Ywhae	Cbx6	4921531C22Rik	Cpeb3	Gstm1	Lgals3bp	Cadm1
18									Itpripl1			Nvl					Pm20d1	Naxd			Tubb6		Acrbp	Gm26507	Nrm	Slc4a2	Klf5	Nme6	0610030E20Rik	Arhgap9
19									Abhd11os								Perp	Rps15			Clic1		Vat1	Slc39a1	Rce1	Jmjd1c	Mesp2	Ptgfr	Adat3	Polr3g
20									Tnfrsf10b								Cdc34	Htra1			Tbc1d8		Cep44	Dctn4	Katna1	Ube2b	Zfp92	Stim1	Afg1l	Bicral
21									Phlda3								Ruvbl2				Gm26656		Sema6b	Otub1	Ube2m	Pdpk1	Tmem184a	Baiap2	Fat1	Lhpp
22									Klhl26								Wdr35						Gm24514	St13	Eipr1	Klhdc4	Cntn5	Rps18	Gstm6	Slc35d3
23									Mdm2								Fam110a						Irs2	Mal2	Mrps34	Rock1	Hsd17b14	Slc36a2	Zfp248	Dnah2
24									Eps8								Pvt1						Sult5a1	Lrrc8a	C030014I23Rik	Dock7	Bglap2	Zcchc4	Alox8	Ddrgk1
25									Tnfrsf26								E4f1						Rac3	Syt4	Uggt1	Gm11418	Bglap	Sox5	Ssc5d	Nefh
26									Map3k20								Mybl1						Bod1l	Map3k12	Traf6	Cpq	Gfap	Pou6f1	BC028528	Scn4b
27									Baiap2								Serpine2						E130309D02Rik	Nadk2	Gm12592	Ankrd13a	Dmrtb1	Bcl6	Fahd1	Srgap2
28									Snhg15								Gpc4						Gpr82	Gm8566	Mlana	Gbp3	Trp53i11	Gtpbp3	Csrp3	Ptchd4
29									Polk								Ass1						Zfp445	Ppm1h	Pcdhb11	Gria3	Kcne1l	Cldn12	Siglec5	Spata33
30									Tcirg1								Glrx3						Pde1a	BC031181	Ddias	Adamts16	Cutal	Smpd2	Timeless	Prkcb
31									Plek2								Col9a3						Ehd4	Upf1	Gbp7	C2cd5	Trp73	Ctxn3	Gm26710	CK137956
32									Trp53														Med25	Kdelr2	Gm4419	Nudt5	Plekha7	Edrf1	Rab11fip1	C2cd2l
33																							Prox1	Ppp4r3a	Hcst	Tlr3	1500009L16Rik	Necab2	Flt4	Pde1b
34																							Adgrf4	Smg7	Spag16	Tmtc4	Car12	AI115009	Sec16b	Il4ra
35																							Ncam2	Csrnp2	Gabrd	Zbtb6	Cenpf	Gm26710	Mreg	Mettl14
36																							Neu3	Prelid3b	Abi3bp	Gm3468	Dennd2c	Czib	Gm15714	Syndig1l
37																							Gm22567	Gsdme	Gas2l2	Gsap	Rin2	1500002C15Rik	Gm26815	Tsc22d3
38																							Fam219a	Ap1ar	Rbm38	Cplane1	Ces2g	Cars2	Klhdc7a	Thop1
39																							Taf3	Clec1a	Ube2l6	Rtel1	Ppp1r13l	Lamtor2	Gm26772	Vav3
40																							Kifc3	AI593442	Chrac1	Rcor3	Rps28	Hint2	Eola1	Slc43a2
41																							Eif4g1	Psma3	Ano3	Bicd1	Triobp	Ints10	Slc27a3	Prelid3a
42																							Fam207a	Efcab14	Kif13b	Fam120a	Tuft1	Tsnax	Mak16	Phtf1
43																							Katnal2	Tmem222	Gm26798	Osbpl8	Glb1l2	Arhgap36	5830454E08Rik	Rsrp1
44																							Lrrc19	Ahctf1	Pgr	Nktr	Smad3	Mmp9	Snrnp200	Nsdhl
45																							2500004C02Rik	Khsrp	Gm11613	Acsl1	Casq2	Layn	Zfp87	Alas1
46																							Mtf1	Gm5436	Gm24289	Ino80	Cav1	Rbfox3	Carlr	Sqle
47																							Zfp647	Schip1	Bhlhe22	Tmem236	Tcf7l2	Pdyn	Rnase4	Hnrnpdl
48																							Eif4ebp2	Pdpn	Serpina3c	4930594M22Rik	Anxa3	Hapln4	Irgm1	Syde1
49																							Rfc4	RP23-35K5.2	Rpl28	Fubp3	Pld2	Pigp	Smco3	Kif3a
50																							Nkd1	Fam3c	Gm26547	Fbxo11	Lhfpl1	Tmprss15	Txnl4a	Pask
51																							Csn3	1810037I17Rik	Gm5898	Evi5	Mief1	Penk	Jmjd6	Begain
52																							Gm26601	B4galt1	Actc1	Cnot9	Sag	D430036J16Rik	Gsto1	Impdh1
53																							Tedc1	Ddhd2	Zc2hc1c	Angptl3	Arhgef5	Gabrq	Mpo	mt-Nd4
54																							Stk17b	Gpat3	Sdcbp2	Fam13a	Fgfbp3	Cck	Aamp	Mvk
55																							Neurod2	Inpp4a	Erf	Ythdc2	Elk3	Fbxo27	Pard6a	Gdf11
56																							Ccl7	Mcmbp	Cr2	Ano4	Cflar	Gm26673	Gon7	Brms1l
57																							Lpl	Pik3r6	Ak8	Stat4	Hs3st6	Sh3bgr	Zfp365	Zfp687
58																							Slc17a6	Shc2	Dapk1	Atp7b	Fcgrt	Nr3c2	Cd44	Chpt1
59																							Rbbp9	Tagap1	Septin11	Ddx31	Dkkl1	Hecw1	Ddit3	Adam23
60																							Nfyb	Bnip2	Emid1	Ice1	C1qtnf1	Mdp1	H4c8	Map3k5
61																							BB218582	Ndufa12-ps	Slc2a9	Smpd4	Cryab	Bcl11a	Foxo3	Arhgef25
62																							Cyp2d22	Gnb5	Gdf15	Naa15	Fgfr3	Pdk1	Zfp750	Vwa8
63																							Ldlrap1	Hcrt	Apaf1	Sdcbp2	Gm26724	Colgalt2	Gm26707	Tjp1
64																							Tpm2	Inip	Cacnb3	Thoc2l	Abcg2	Naxe	Ndufaf3	Lama1
65																							Fchsd1	Acsl4	Kctd4	Pip4p2	Rtel1	Stx4a	Rad51d	Itgb5
66																							Pde5a	Rdh13	Lif	Nr1d2	Fam43a	Kcnv1	Pmm1	Tox2
67																								2310057M21Rik	R74862	Mtmr6	Slc15a4	Trpm2	Igfbp6	Cadps
68																								6430590A07Rik	Mgmt	Gas5	Gata6	Brdt	Shroom1	Atp11c
69																								Sc5d	Tunar	Lmo2	Thbs2	Trim9	N4bp1	Pip4k2a
70																								Hmgcr	Lhx1os	Hdac6	Fam83h	Pwwp3b	Bet1l	Acat2
71																								C730034F03Rik	Tagln2	Glis2	Pon2	Aifm3	Pamr1	Rexo2
72																								Mrps25	Cald1	Man2a1	Ahcy	Resp18	Ces2e	Fryl
73																								Rab40b	Foxa2	Luc7l	S100a16	Gm26614	Parp4	Prr18
74																								Anapc5	Homer3	Ccnt2	Tspo	Cpne6	Rgs5	Csad
75																								Eif3m	Mdga1	Tppp	Ddit4	Hspb6	Il17rb	Morn1
76																								Ovol2	Pak4	Luzp1	Ifi35	Rab24	Cckbr	Dcun1d4
77																								Eef1a1	Gpr88	B830012L14Rik	Gtf3c5	Clmp	Siva1	Pigc
78																								Pfdn1	Etnk2	Snhg20	Aox4	Ldlr	Rchy1	Nrp2
79																								Ndufb6	Gm11738	Acad10	S100a11	Hrk	Hmcn2	Adamtsl2
80																								Abhd2	Cldn10	Las1l	Col18a1	A830018L16Rik	Brix1	Fzd10os
81																								Scn2b	Col9a2	Gm26205	Gm26703	Srsf2	Colec11	Evi5l
82																								Klhl9	Nlrc5	Chrac1	Gsta4	Rasgrf1	Efcab10	Jph4
83																								Vapa	Nuak2	Rasal3	Mgarp	Pacsin2	Ankrd34c	Hsd17b7
84																								Folh1	Thumpd1	Med7	Tmem19	Hopx	Tbrg4	Gpcpd1
85																								Aptx	Fxyd6	Etfb	Afap1l2	Armc9	Nnt	Taf15
86																								Ovca2	Sgca	Frmpd3	Enc1	Amdhd2	Nphs1	Alpl
87																								Utp18	Mir3091	Sgpp1	Ccdc81	Trappc2l	F11r	Kif5a
88																								Psmg3	Sh3gl3	Mtif2	Nup62	Fasn		Creb3l2
89																								Gnb1	Heph	Arsa	AA986860	Cabp7		Malat1
90																								Abl1	Map4k4	Adamts15	Neil2	1700066M21Rik		Slc25a33
91																								Gm16586	Cyb561	Gal	Mis18a	Mettl26		Erc2
92																								Mpc1-ps	Slc5a9	Tmem30c	H1f3	Rab10os
93																								Fam219b	Ccp110	Zfp286	Igsf10	Matn2
94																								Ap2a2	Celf2	Tln1	Mapkapk3	Rspo2
95																								Birc6	Cplx2	Zbtb33	S100a3	Tnfrsf22
96																								Raf1	Espn	Tsku	Pah	Nrf1
97																								Gm16973	Rtl1	Magt1	Exoc4	Gm1673
98																								Picalm	Stmn4	3110001I22Rik	Apobec1	Dync1i1
99																								Cinp	Abca1	Cmas	9330133O14Rik	Patj
100																								Wbp1l	Acer2	Hnrnpu	Vsig8	Arl16
101																								BC002059	Neurl2	Vgf	Caskin2	Tnfaip8l3
102																								Mtmr2	Syt5	Cdkn1b	Bche	Arpp21
103																								Gsk3b	Plxdc2	Gad1	Laptm5	Gpam
104																								Syt12	Ube2c	Decr2	Lrrc3	Gabrb3
105																								Gstm5	Pak6	Tmppe	Fam81a	Arsg
106																								Nek3	Snord118	Megf6	Carhsp1	Ppp1r1c
107																								Shtn1	Nmrk2	Per3	Chrnb3	Slco3a1
108																								Gm5424	Syt1	Pde11a	Cln8	Rnf139
109																								A230072C01Rik	Gpr149	Slc36a1	Anxa8	Pdcd2l
110																								Gtf2a2	Rpl27	Nrbp2	Greb1	Tor3a
111																								Fn3krp	Bloc1s2	Ndufb7	Gm26666	Mir9-3hg
112																								Iqsec1	Zfp488	Pik3c2a	Stab1	Slx1b
113																								Gm6485	Aaas	Gm26705	Mgam	Carmil1
114																								Calm2	AI504432	Pde1c	Pard6g	Blvra
115																								1700113A16Rik	Ndst3	Galm	Il1b	Mtap
116																								Cct4	Spata32	Tmem258		Phka1
117																								Gm16493	Gm15675	Iars2		Lrrcc1
118																								Commd4	Rln1	Cdan1		Mdga2
119																								Cux2	Dclk3	Zc3h7a		Mirg
120																								Zfand4	Fbxw9	Acaa1a		Mvb12a
121																								Sub1	Usp34	Fmc1		Scmh1
122																								Med28	Tmem74bos	AU021092		Htatip2
123																								Tmem260	Ifitm2	R3hdm4		Gm26538
124																								Prr15	Mycn	Pax8		Necab1
125																								Peg12	Sdc1	Qtrt1		Jph3
126																								Polk	Chl1	Pzp		Ost4
127																								H2-K1	Cenpt	Ptgs1		Cfap20
128																								Rnf138	Spint2	Kif22		Lypd1
129																								Pdcd4	Tmem163	Trpc2		Fxyd7
130																								Slitrk2	Kifc5b	Cdc45		Smug1
131																								Naip1	Npas3	Ppp4r1		Dhps
132																								Cbx3	Tnks2	Spry2		Gabra2
133																								Insyn2a	Hpcal1	Epb41l5		Pdgfd
134																								Synj2bp	Diras2	Mrpl42		Atp11b
135																								Trappc8	Gm26780	Kctd2		Adgra3
136																								Atp5o	Trim11	Clvs2		Pacsin3
137																								Ccnb2-ps	Gap43	Lig1		Tmem186
138																								Arhgap24	Gm14057	Gm12115		Fads6
139																								Tsga10	Btbd19	Calcb		L3mbtl4
140																								Slc6a7	Pcp4	Calca		Lhx4
141																								Iqub	Scn3a	Lin7b		B3galt5
142																								Pex7	Plxnb1	Kctd7		Dgkk
143																								Tmem98	Ly6c2	Vcpkmt		Hipk4
144																								Wdr27	Rcbtb1	Lgi3		Ift46
145																								Coro1a	Sulf2	Riok3		2310009B15Rik
146																								Lgi2	Spaca3	Acad8		Mrps35
147																								Apmap	Anks1b	Aldoa		Bora
148																								Sgsh	Tmbim4	Bag3		E230016M11Rik
149																								Lum	Tmem191c	Dffa		Tecpr1
150																								Rhbdl3	Emx2	Cp		Ccdc82
151																								Kctd15	Crabp2	Epdr1
152																								Tgfbrap1	Ptp4a3	Slc16a6
153																								Gstt1	Sbk1	Esyt1
154																								Dym	Apoa1	Mthfsd
155																								Gm11716	Cop1	Ttc39b
156																								Tmem243	St8sia2	Tmeff2
157																									Pdyn	Fkbp1b
158																									Dscaml1	Prmt3
159																									Limk2	Zfp804a
160																									Gpr17	Bbs4
161																									Stx5a	Map2k2
162																									Adrb3	Sorcs3
163																									Gpr26	Gns
164																									Syt16	Nell2
165																									Olfm3	Cyb5r1
166																										Nefm
167																										Pfkm
168																										Lpp
169																										Gna14
170																										Chrm1
171																										Syt3
172																										Mical2
173																										Fbxo2
174																										Mycbpap
175																										Glud1
176																										Kyat1
177																										Tecpr2
178																										Sgpp2
179																										Chchd3
180																										Abhd3
181																										Hdhd5
182																										Fgf11
183																										Ddi2
184																										Phyh
185																										Cds1
186																										Gfm2
187																										Slc2a8
188																										Dctd
189																										Tubb3
190																										Thada
191																										Myh7b
192																										Zfp101
193																										Tnfrsf12a
194																										Gm10109
195																										Vwa7
196																										Dgcr6
197																										Cnpy2
198																										Psmc5
199																										Sez6l2
200																										Lyrm7
201																										Polr3gl
202																										Swap70
203																										Wnt5b
204																										Ndufa10
205																										Rgcc
206																										Fdxr
207																										Syndig1
208																										Fibp
209																										Camkk1
210																										Taf4b
211																										Prss12
212																										Slc2a6
213																										Fstl1
214																										Chid1
215																										Ss18l2
216																										Gm4660
217																										Prkab2
218																										Cacna2d3
219																										Sh2d5
220																										Gm27031
221																										Grm4
222																										Sod2
223																										Cdo1
224																										Emc9
225																										Sfmbt2
226																										Gm9938
227																										Ppa2
228																										Asb13
229																										Itpr1
230																										Card9
231																										Usp31
232																										Kcnab1
233																										Tfrc
234																										Zdhhc24
235																										Acan
236																										Stk38
237																										Cpeb1
238																										Hspb1
