# Supplementary material for: LCM-seq reveals unique transcriptional adaptation mechanisms of resistant neurons and identifies protective pathways in spinal muscular atrophy
Source: Genome Res. 2020 Aug;30(8):1083–96. doi: 10.1101/gr.265017.120 (PMC7462070; doi:10.1101/gr.265017.120)
Supplement: Supplemental Material [file supp_gr.265017.120_Supplemental_Table_S7.xlsx]

## Sheet: Content
This file contains:
	Supplemental_Table_S7	Gene lists from Venn diagram in Supplemental Fig. S8D. Overlap in differentially expressed genes (SMA versus control) between CN3/4 and SC motor neurons and unaffected controls (all time points combined).

## Sheet: Table_S7
Gene lists from Venn diagram in Supplemental Fig. S8D. Overlap in differentially expressed genes (SMA versus control) between CN3/4 and SC motor neurons and unaffected controls (all time points combined).
Cell types	RN, CN3/4, CN10, SC	RN, CN3/4, CN10	RN, CN3/4, SC	RN, CN10, SC	CN3/4, CN10, SC	RN, CN3/4	RN, CN10	RN, SC	CN3/4, CN10	CN3/4, SC	CN10, SC	RN	CN3/4	CN10	SC
N. genes	1	0	2	0	0	3	4	3	2	75	4	68	471	70	204
1	Smn1		Itpripl1			Actr2	Ubap1l	Rab11fip1	Cdc45	1700007K13Rik	Avp	1110004F10Rik	Snhg18	Vxn	0610030E20Rik
2			Plek2			Klhl23	Lars2	Smim1	Pik3c2a	Abhd11os	Oxt	2900026A02Rik	Fmc1	Platr14	Eola1
3						Traf6	Olig2	Zfp52		9230114K14Rik	Pmch	Susd6	1110008P14Rik	A730060N03Rik	Bcor
4							Ptgds			A530058N18Rik	Scn4b	A730011C13Rik	Lhx1os	Acot6	Carlr
5										Abca2		A930003A15Rik	Cplane1	Acsbg1	5830454E08Rik
6										AI480526		A930038B10Rik	2410124H12Rik	Acta1	Fzd10os
7										Baiap2		Adamts10	Snhg20	Ano2	9530059O14Rik
8										Btg2		Aga	Tunar	Arl2	Aamp
9										Cav2		Arhgef9	Etaa1os	Arrdc3	Abcd2
10										Ccl17		Arrb2	3110001I22Rik	AW549877	Acat2
11										Ccng1		Aurka	Ddias	Bace2	Ace
12										Cdkn1a		B230216N24Rik	4921531C22Rik	Ccdc142	Adam23
13										Ckap2		B3galnt1	Stum	Cebpe	Adamtsl2
14										Cox6b2		Erich3	9530077C05Rik	Chrne	Adat3
15										Cpne2		C330011M18Rik	A2m	Cntnap5c	Gon7
16										Crip2		Cdh12	Aaas	CT030684.1	Alas1
17										Dcxr		Col6a3	Abca1	Dalrd3	Alox8
18										Ddit4l		Cpm	Abcc5	Ddx39a	Alpl
19										Eda2r		Crabp1	Abhd3	Efcc1	Ankrd34c
20										Efs		Cystm1	Abi3bp	Elovl7	Arhgap9
21										Eps8		D730003I15Rik	Acaa1a	Ergic3	Arhgef25
22										Etl4		Dbpht2	Acad10	Fbxl21	Atp11c
23										Eva1c		Desi2	Acad8	Gja1	B930036N10Rik
24										Inka2		Dnah8	Acan	Gm10118	BC028528
25										Fas		Ednrb	Acer2	Gm960	Begain
26										Gjb5		Egfr	Acsl1	Gmeb1	Bet1l
27										Snhg15		Enpp1	Actb	Grp	Brix1
28										Gpx3		Pimreg	Actc1	Hcrt	Brms1l
29										Gtse1		Dipk1c	Adamts15	Hexb	C2cd2l
30										Hapln1		Fbn1	Adamts16	Ilkap	C920021L13Rik
31										Hcfc1r1		Gad2	Adrb3	Kat5	Cadm1
32										Iapp		Gm12002	Agt	Krt25	Cadps
33										Ift27		Gm17137	AI504432	Krt83	Ccdc74a
34										Klhl26		Gm21992	Shisa8	Lama4	Cckbr
35										Pidd1		Gm24336	Ak8	Map4k5	Cd44
36										Lrrc49		Gm24514	Aldh4a1	Mog	Ces2e
37										Luc7l		Gm26917	Aldoa	Msn	Chodl
38										Ly6d		Golt1b	Alox5	Ndnf	Chpt1
39										Magt1		Gtf3c4	Angptl3	Nudt8	Chrm2
40										Mapk11		Hmmr	Ankrd13a	Oasl2	CK137956
41										Mdm2		Igfbp7	Anks1b	Ociad2	Clic1
42										Mgat3		L3mbtl1	Ano3	Pcid2	Colec11
43										Miat		Lct	Ano4	Pltp	Colq
44										Mmp2		Lrr1	Apaf1	Polr1b	Commd2
45										Ndufb10		Meis2	Apoa1	Pon2	Creb3l2
46										Necab3		Mgst1	Arglu1	Prlh	Csad
47										Phlda3		Msc	Arl10	Psph	Csrp3
48										Plekhd1		Nme4	Arsa	Rassf10	Cstf2
49										Plk2		Obscn	Arsj	Rnf180	Rsrp1
50										Pmaip1		Odf4	Asb13	Rnf2	Dcaf4
51										Polk		Orai1	Ass1	RP23-442I7.1	Dcun1d4
52										Prpf8		Phxr4	Atp7b	Rsph10b	Ddit3
53										Prss56		Pnrc2	AU021092	Ska1	Ddrgk1
54										Psrc1		Slc66a1	Axl	Slc26a6	Ddx10
55										Ptk2b		Ptprc	B830012L14Rik	Smim6	Ints6l
56										Ptprv		Rab31	Bag3	Sptb	Dnah2
57										Rgs12		Rbms2	Bbs4	Tceanc	Efcab10
58										Rin1		Rhno1	Ice1	Tdrd1	Entpd3
59										Robo3		Rpusd1	Tmem74bos	Tmem255a	Erc2
60										Rph3a		Rrm2	Bdnf	Trh	Evi5l
61										Sf3b5		Kmt5c	Bhlhe22	Tspear	F11r
62										Shisa4		Syt4	Bhlhe41	Tubgcp4	Fahd1
63										Snhg11		Tctex1d2	Bicd1	Upk3a	Fam72a
64										Snrpa1		Tnc	Bloc1s2	Wasf3	Fat1
65										Susd2		Tsix	Btbd19	Wdyhv1	Flt4
66										Tap1		Selenos	C030014I23Rik	Zfp423	Fndc1
67										Tcea3		Zfp112	C2cd5	Zfp658	Foxo3
68										Tcirg1		Zfp945	Cacna2d3	Zic3	Fryl
69										Tmem43			Cacnb3	Zmat2	Gdf11
70										Tnfrsf10b			Calca	Zup1	Bicral
71										Tnfrsf26			Calcb		Gm15714
72										Trim72			Cald1		Gm16630
73										Trp53			Camkk1		Gm26656
74										Tsku			Card10		Gm26707
75										Map3k20			Card9		Gm26710
76													Naxd		Gm26772
77													Cbx6		Gm26815
78													Kyat1		Gpcpd1
79													Ccdc151		Gstm6
80													Ccnt2		Gsto1
81													Ccp110		Gys1
82													Cdan1		Haghl
83													Cdc34		H4c8
84													Cdkn1b		Hmcn2
85													Cdo1		Hnrnpdl
86													Cds1		Hsd17b7
87													Hdhd5		Htr1b
88													Celf2		Igfbp6
89													Celf5		Il17rb
90													Cenpt		Il23a
91													Cercam		Il4ra
92													Chchd3		Impdh1
93													Chid1		Inf2
94													Chl1		Irgm1
95													Chrac1		Itgb5
96													Chrm1		Jmjd6
97													Cldn10		Jph4
98													Clvs2		Kcnq2
99													Cmas		Kif3a
100													Cnpy2		Kif5a
101													Col1a2		Klhdc7a
102													Col5a2		Afg1l
103													Col9a2		Lama1
104													Col9a3		Lgals3bp
105													Cp		Lhpp
106													Cpeb1		Mak16
107													Cplx2		Malat1
108													Cpq		Map3k5
109													Cr2		Mccc2
110													Crabp2		Mettl14
111													Ctxn1		Morn1
112													Cuta		Mpo
113													Cyb561		Mpzl3
114													Cyb5r1		Mreg
115													Thoc2l		Mt1
116													Dapk1		mt-Co1
117													Dclk3		mt-Nd4
118													Dctd		Mvk
119													Ddi2		Myg1
120													Ddx31		N4bp1
121													Ss18l2		Ndufaf3
122													Decr2		Nefh
123													Dffa		Nfkbie
124													Dgcr6		Nnt
125													Diras2		Nphs1
126													Dmbx1		Nrp2
127													Dock7		Nsdhl
128													Dscaml1		Nutf2
129													E4f1		Pamr1
130													Emc9		Pard6a
131													Emid1		Parp4
132													Emx2		Pask
133													Epb41l5		Pcgf2
134													Epdr1		Pde1b
135													Ephx1		Phtf1
136													Eral1		Pigc
137													Erf		Pip4k2a
138													Espn		Plxdc1
139													Esyt1		Pmm1
140													Etfb		Polr3g
141													Etnk2		Pou4f3
142													Evi5		Prkcb
143													Fam110a		Prpsap1
144													Fam120a		Prr18
145													Fam13a		Ptchd4
146													Lratd1		Rab42
147													Fbxo11		Rad51d
148													Fbxo2		Rchy1
149													Fbxw9		Rexo2
150													Fdxr		Rgs5
151													Fgf11		Rnase4
152													Fibp		Rprm
153													Fkbp14		Sec16b
154													Fkbp1b		Sesn2
155													Flnb		Shroom1
156													Fndc4		Siglec5
157													Foxa2		Siva1
158													Frmpd3		Slc13a4
159													Fstl1		Slc25a33
160													Fubp3		Slc26a9
161													Fxyd6		Slc27a3
162													Gabrd		Slc35d3
163													Gad1		Slc43a2
164													Gal		Slc8b1
165													Galm		Prelid3a
166													Gap43		Smad7
167													Gas2l2		Smco3
168													Gas5		Smr3a
169													Nipsnap2		Snrnp200
170													Gbp3		Snx6
171													Gbp7		Sox10
172													Gdf15		Spata33
173													Gfm2		Sqle
174													Glis2		Srgap2
175													Glrx3		Ssc5d
176													Glud1		Ssna1
177													Gm10109		Stxbp2
178													Gm10125		Syde1
179													Gm11418		Syndig1l
180													Gm11613		Taf15
181													Gm11738		Tbc1d8
182													Gm12115		Tbrg4
183													Gm12592		Thop1
184													Gm12940		Timeless
185													Gm14057		Tjp1
186													Gm15675		Tmem175
187													4930594M22Rik		Tox2
188													Gm17066		Trim47
189													Gm17477		Tsc22d3
190													Gm23347		Tubb6
191													Gm24289		Twist2
192													Gm26205		Txnl4a
193													Gm26547		Usp11
194													Gm26705		Vav2
195													Gm26780		Vav3
196													Gm26798		Vipr2
197													Gm27031		Vwa8
198													Gm2a		Wdr91
199													Gm3468		Zdhhc7
200													Gm4419		Zfp248
201													Gm4660		Zfp365
202													Gm5898		Zfp687
203													Gm9938		Zfp750
204													Gna14		Zfp87
205													Gns
206													Gpc4
207													Gpr149
208													Gpr17
209													Gpr179
210													Gpr26
211													Gpr88
212													Gria3
213													Grm4
214													Gsap
215													Hcst
216													Hdac6
217													Heph
218													H1f2
219													Hnrnpu
220													Homer3
221													Hpcal1
222													Hs3st4
223													Hsf2
224													Hspb1
225													Htra1
226													Iars2
227													Ifitm2
228													Ino80
229													Itpr1
230													Jmjd1c
231													Katna1
232													Kcnab1
233													Kcng4
234													Kcnq5
235													Kctd2
236													Kctd4
237													Kctd7
238													Kif13b
239													Kif22
240													Kifc5b
241													Klhdc4
242													Las1l
243													Lepr
244													Lgi3
245													Lgr4
246													Lif
247													Lig1
248													Limk2
249													Lin7b
250													Lmo2
251													Lpp
252													Lrrc20
253													Luzp1
254													Ly6c2
255													Lyrm7
256													Lysmd2
257													Mab21l3
258													Magi1
259													Man2a1
260													Map2k2
261													Map4k4
262													Mdga1
263													Med7
264													Megf6
265													Vcpkmt
266													Mgmt
267													Mical2
268													Micu3
269													Mir3091
270													Mlana
271													Mrpl42
272													Mrps34
273													Msl3
274													Mthfsd
275													Mtif2
276													Mtmr6
277													Mybl1
278													Mycbpap
279													Mycn
280													Myef2
281													Myh7b
282													Myl6
283													Naa15
284													Ncoa3
285													Ndst3
286													Ndufa10
287													Ndufb7
288													Nefm
289													Nell2
290													Neurl2
291													Nktr
292													Nlrc5
293													Nmrk2
294													Npas3
295													Nr1d2
296													Nrbp2
297													Nrm
298													Nuak2
299													Nudt5
300													Nup37
301													Nvl
302													Olfm3
303													Olfr920
304													Osbpl8
305													Pak4
306													Pak6
307													Pax8
308													Pcdhb11
309													Pcp4
310													Pde11a
311													Pde1c
312													Pdpk1
313													Pdyn
314													Per3
315													Perp
316													Pfkm
317													Pgr
318													Phyh
319													Pitrm1
320													Plxdc2
321													Plxnb1
322													Pm20d1
323													Pnn
324													Polr3gl
325													Ppa2
326													Ppp4r1
327													Prima1
328													Prkab2
329													Prmt3
330													Prss12
331													Psmc5
332													Ptgs1
333													Ptov1
334													Ptp4a3
335													Pvt1
336													Pwwp2b
337													Pzp
338													Qtrt1
339													R3hdm4
340													R74862
341													Rasal3
342													Rbm26
343													Rbm38
344													Rcbtb1
345													Rce1
346													Rcor3
347													Cop1
348													Rgcc
349													Riok3
350													Rln1
351													Rock1
352													Rpl27
353													Rpl28
354													Rps15
355													Cnot9
356													Rtel1
357													Rtl1
358													Ruvbl2
359													Sbk1
360													Scn3a
361													Scn3b
362													Sdc1
363													Sdcbp2
364													Sdhb
365													Sema4b
366													Sema5a
367													Sema7a
368													Septin11
369													Septin4
370													Serpina3c
371													Serpine2
372													Sez6l2
373													Sfmbt2
374													Sgca
375													Sgpp1
376													Sgpp2
377													Sh2d5
378													Sh3gl3
379													Sirt6
380													Slc16a6
381													Slc25a35
382													Slc2a6
383													Slc2a8
384													Slc2a9
385													Slc36a1
386													Slc38a2
387													Slc4a2
388													Slc5a9
389													Smpd4
390													Snord118
391													Snord13
392													Sod2
393													Sorcs3
394													Spaca3
395													Spag16
396													Spata32
397													Spc25
398													Spint2
399													Spry2
400													St8sia2
401													Stat4
402													Stk38
403													Stmn4
404													Stx5a
405													Sulf2
406													Swap70
407													Syn1
408													Syndig1
409													Syt1
410													Syt16
411													Syt3
412													Syt5
413													Taf4b
414													Tagln2
415													Tecpr2
416													Tesc
417													Tfrc
418													Thada
419													Them5
420													Thumpd1
421													Tial1
422													Tln1
423													Tlr3
424													Tmbim4
425													Tmed8
426													Tmeff2
427													Tmem163
428													Tmem191c
429													Tmem236
430													Tmem258
431													Tmem30c
432													Pip4p2
433													Tmppe
434													Tmtc4
435													Tnfrsf12a
436													Tnks2
437													Tppp
438													Trap1
439													Trim11
440													Trp53inp1
441													Trpc2
442													Tshr
443													Eipr1
444													Ttc39b
445													Ttyh2
446													Tubb3
447													Ube2b
448													Ube2c
449													Ube2l6
450													Ube2m
451													Ubp1
452													Uggt1
453													Usp31
454													Usp34
455													Uspl1
456													Vgf
457													Vwa7
458													Wdr35
459													Wnt5b
460													Wtap
461													Ythdc2
462													Zbtb33
463													Zbtb6
464													Zc2hc1c
465													Zc3h7a
466													Zdhhc24
467													Zfp101
468													Zfp286
469													Zfp488
470													Zfp804a
471													Zscan26
