# Supplementary material for: LCM-seq reveals unique transcriptional adaptation mechanisms of resistant neurons and identifies protective pathways in spinal muscular atrophy
Source: Genome Res. 2020 Aug;30(8):1083–96. doi: 10.1101/gr.265017.120 (PMC7462070; doi:10.1101/gr.265017.120)
Supplement: Supplemental Material [file supp_gr.265017.120_Supplemental_Table_S8.xlsx]

## Sheet: Content
This file contains:
	Supplemental_Table_S8	Disease module (Midnightblue) genes from the WGCNA of all somatic samples, related to Fig. 3.

## Sheet: Table_S8
Disease module (Midnightblue) genes from the WGCNA of all somatic samples. MM = module membership.
Note: positive MM values in the module indicate increased expression levels over time
Rank	geneSymbol	MM.midnightblue	p.MM.midnightblue
1	Trim72	0.7929	6.24003e-27
2	Them5	0.754908	3.55598e-23
3	Bglap2	0.734054	2.1561e-21
4	Psrc1	0.730563	4.12903e-21
5	Fas	0.722834	1.67934e-20
6	Zmat3	0.72154	2.11404e-20
7	Spaca3	0.716427	5.18569e-20
8	Zfp87	0.706459	2.82143e-19
9	Ddit4l	0.704164	4.12604e-19
10	Tnfrsf10b	0.702069	5.818e-19
11	Cdc34	0.70008	8.04176e-19
12	Pmaip1	0.697388	1.2409e-18
13	Crip2	0.69485	1.85962e-18
14	Alox5	0.679363	2.01101e-17
15	Lif	0.679153	2.07479e-17
16	Ly6d	0.67914	2.07889e-17
17	Bglap	0.676347	3.14413e-17
18	Tmbim4	0.673627	4.68269e-17
19	Slc5a9	0.672547	5.47897e-17
20	Pmm1	0.672336	5.64928e-17
21	Gtse1	0.66898	9.16143e-17
22	Smn1	-0.668126	1.03504e-16
23	Klhl26	0.66765	1.10774e-16
24	Eda2r	0.666684	1.27065e-16
25	Cdkn1a	0.662462	2.30174e-16
26	Tnfrsf26	0.657389	4.64123e-16
27	Dcxr	0.657167	4.78435e-16
28	Icam1	0.655585	5.93673e-16
29	Slc2a9	0.654799	6.60564e-16
30	Cpne2	0.648776	1.48101e-15
31	Sf3b5	0.648526	1.53099e-15
32	Hs3st6	0.641469	3.85137e-15
33	Prpf8	0.640409	4.41472e-15
34	Klhdc7a	0.63649	7.27874e-15
35	Rps27l	0.633356	1.08023e-14
36	Ddx56	0.632742	1.16646e-14
37	Iapp	0.628776	1.90812e-14
38	Cutal	0.6268	2.43193e-14
39	Snrpa1	0.625918	2.70846e-14
40	Tmem19	0.621736	4.49312e-14
41	Gjb5	0.619785	5.67527e-14
42	Ddx24	0.615723	9.18115e-14
43	Il1b	0.611023	1.58836e-13
44	Mdm2	0.608663	2.08448e-13
45	Plk2	0.602803	4.05435e-13
46	Tmem74bos	0.599429	5.91005e-13
47	Slc22a7	0.596229	8.41546e-13
48	Trp73	0.5943	1.03943e-12
49	Lpin1	0.592789	1.22522e-12
50	Slc26a9	0.585051	2.80656e-12
51	Pm20d1	0.582933	3.50817e-12
52	2410124H12Rik	0.576408	6.90569e-12
53	Plek2	0.562309	2.83827e-11
54	Mab21l3	0.562195	2.87007e-11
55	Sytl1	0.562164	2.87892e-11
56	Gm16630	0.559052	3.89754e-11
57	Ptk2b	0.558711	4.02819e-11
58	Ces2e	0.557713	4.43576e-11
59	Riok3	-0.556611	4.93196e-11
60	Palm3	0.556168	5.14631e-11
61	Inka2	0.551966	7.6799e-11
62	9230114K14Rik	0.542417	1.86858e-10
63	4930562A09Rik	0.540252	2.27712e-10
64	Rnu1a1	0.537908	2.81651e-10
65	9130230L23Rik	0.537209	2.99974e-10
66	Rapgef3	0.534718	3.75124e-10
67	S100a3	0.534657	3.77167e-10
68	Ruvbl2	0.533495	4.18365e-10
69	Pdk1	-0.53129	5.08766e-10
70	Tap1	0.530469	5.46997e-10
71	Ptp4a3	0.528313	6.61072e-10
72	Gdf15	0.52531	8.5869e-10
73	Abhd11os	0.523954	9.65577e-10
74	Gm14706	0.523635	9.92452e-10
75	Exoc4	0.519215	1.4489e-09
76	Nub1	0.518866	1.49247e-09
77	Gm24517	0.514563	2.14514e-09
78	Ptprv	0.513975	2.25321e-09
79	Aamp	0.513314	2.38103e-09
80	Trp53inp1	0.511936	2.67036e-09
81	Ppp5c	0.510712	2.95525e-09
82	Dhx30	0.508958	3.41503e-09
83	Ift27	0.507338	3.90037e-09
84	Hmcn2	0.506357	4.22564e-09
85	Lhfpl1	0.504981	4.72598e-09
86	Homer3	0.50464	4.85867e-09
87	Slc37a2	0.504629	4.86312e-09
88	Mlana	0.501706	6.15675e-09
89	Sgca	0.497469	8.63271e-09
90	Wdr35	0.494367	1.10241e-08
91	Gpr1	0.49151	1.37798e-08
92	Cstf2	-0.490174	1.52849e-08
93	Aaas	0.489275	1.63843e-08
94	Snord118	0.488303	1.76587e-08
95	Tshr	0.487895	1.82218e-08
96	Olfr920	0.487784	1.8378e-08
97	Gm11738	0.487243	1.91569e-08
98	Wdr70	0.485092	2.25781e-08
99	Pigp	-0.482738	2.69929e-08
100	Scrn3	0.477758	3.92127e-08
101	Zfp622	0.475989	4.47112e-08
102	Gm26724	0.474946	4.8292e-08
103	Hspa14	0.47306	5.54712e-08
104	Trim11	0.470457	6.70757e-08
105	Spc25	0.469771	7.05008e-08
106	Adam8	0.469523	7.17771e-08
107	4930591A17Rik	0.469354	7.26609e-08
108	Epyc	0.468148	7.92793e-08
109	Dnajc8	-0.466966	8.63271e-08
110	Pdcd6ip	0.466156	9.14917e-08
111	Casq2	0.465204	9.79407e-08
112	Agpat5	0.465126	9.84913e-08
113	A430018G15Rik	0.463738	1.08734e-07
114	Prpf31	0.463012	1.14492e-07
115	Ube4a	0.462643	1.17529e-07
116	Padi4	0.46159	1.26614e-07
117	Adrb2	0.459033	1.5157e-07
118	Prss56	0.458536	1.56944e-07
119	Apoa1	0.458345	1.59049e-07
120	Rhod	0.458041	1.62473e-07
121	Stx5a	0.457213	1.72125e-07
122	Mtor	0.456069	1.86385e-07
123	Gfer	0.456009	1.87154e-07
124	Mettl4-ps1	0.454893	2.02201e-07
125	Tnfaip2	0.454888	2.02271e-07
126	Uspl1	0.452902	2.31955e-07
127	Mesp2	0.451218	2.60331e-07
128	Eif4b	0.451009	2.64072e-07
129	Ccnb1	0.446642	3.55092e-07
130	Cep170b	0.445504	3.83329e-07
131	Smad3	0.444768	4.0273e-07
132	Fam83h	0.443981	4.24488e-07
133	Ckap2	0.443472	4.39157e-07
134	Psmb9	0.442867	4.57213e-07
135	Poln	0.442605	4.65232e-07
136	Snord13	0.440969	5.18568e-07
137	Nmrk2	0.440552	5.33047e-07
138	H3c15	0.439749	5.62046e-07
139	Aox4	0.438404	6.14014e-07
140	Dhx8	0.435394	7.47368e-07
141	Gm25588	0.433208	8.61031e-07
142	Sec16b	0.432055	9.27413e-07
143	Gm5576	0.430594	1.01852e-06
144	S100a2	0.430238	1.04198e-06
145	Cdc20	0.430177	1.04602e-06
146	Perp	0.429843	1.06856e-06
147	Rab42	0.429497	1.09243e-06
148	Gm11693	0.429229	1.11123e-06
149	Tnfrsf13b	0.428288	1.17977e-06
150	Tbc1d17	0.428192	1.18698e-06
151	Trim47	0.42646	1.32463e-06
152	B230369F24Rik	0.426031	1.36092e-06
153	Cpsf1	0.425991	1.3644e-06
154	Wnt10a	0.425572	1.40092e-06
155	Neu4	0.425022	1.45026e-06
156	Fpr2	0.419533	2.04157e-06
157	Cav1	0.416045	2.52927e-06
158	B230206L02Rik	0.415707	2.58201e-06
159	Gm5544	0.414484	2.78163e-06
160	E4f1	0.414416	2.79321e-06
161	Irf2bp1	0.413562	2.94172e-06
162	Socs6	0.412361	3.16319e-06
163	Siglec5	0.412252	3.18415e-06
164	Tmem115	0.410907	3.45262e-06
165	Dpf2	0.410837	3.46718e-06
166	Axl	0.410574	3.52242e-06
167	Mccc2	-0.409787	3.69248e-06
168	Fbln2	0.40482	4.95937e-06
169	Anxa8	0.40336	5.40354e-06
170	Eci3	0.40105	6.18411e-06
171	Ly6c2	0.399667	6.70112e-06
172	D330023K18Rik	0.398122	7.32684e-06
173	Rps23rg1	0.397176	7.73693e-06
174	Gm25360	0.396036	8.25985e-06
175	Cd68	0.394392	9.07304e-06
176	Fahd1	0.393953	9.30218e-06
177	Gimap9	0.393324	9.64069e-06
178	Sf3a3	0.391626	1.06136e-05
179	Ppp2r5c	-0.39094	1.1032e-05
180	Ccdc17	0.390347	1.14062e-05
181	Lgals3bp	0.389621	1.18808e-05
182	Ccdc81	0.389353	1.20608e-05
183	Plrg1	0.388207	1.28591e-05
184	Eaf2	0.387946	1.30471e-05
185	Dgki	0.387425	1.34315e-05
186	1700028P14Rik	0.386489	1.41488e-05
187	Gm24873	0.382432	1.76968e-05
188	Actr8	0.380967	1.91718e-05
189	Nlrx1	0.377294	2.33938e-05
190	Gm22997	0.375639	2.55682e-05
191	Sult6b2	0.374504	2.71688e-05
192	Smpdl3b	0.374471	2.72172e-05
193	Lncbate3	0.373161	2.91834e-05
194	Ces2g	0.372836	2.96907e-05
195	Tff3	0.371251	3.22912e-05
196	Prpf3	0.369238	3.59001e-05
197	Kifc5b	0.368667	3.69897e-05
198	Nat1	0.368466	3.73807e-05
199	Aar2	0.368321	3.76655e-05
200	Depdc7	0.367608	3.90956e-05
201	Castor1	0.367197	3.99416e-05
202	Gm26739	0.365138	4.44507e-05
203	Mlst8	0.364154	4.67685e-05
204	Relb	0.363992	4.716e-05
205	Gm12240	0.363626	4.80585e-05
206	Sertad3	0.362602	5.06567e-05
207	Atr	0.360574	5.61919e-05
208	Dydc2	0.360278	5.70459e-05
209	Taf11	0.356963	6.74771e-05
210	Map1s	0.352252	8.53911e-05
211	Setd3	0.351956	8.66507e-05
212	Gtf3c3	0.350584	9.27309e-05
213	Brix1	0.349988	9.54964e-05
214	Ttc4	-0.346381	0.000113923
215	1700003M07Rik	0.343733	0.000129498
216	Art4	0.343511	0.000130891
217	Gm26693	0.343409	0.000131536
218	1810059C17Rik	0.342789	0.000135521
219	Zfas1	0.34129	0.000145608
220	Faf1	-0.338488	0.000166372
221	Armcx3	-0.336664	0.000181327
222	A230020J21Rik	0.335661	0.000190081
223	Gm23037	0.335508	0.000191443
224	Dus1l	0.335495	0.000191566
225	Gm22973	0.335233	0.000193926
226	Nolc1	0.334722	0.000198623
227	Txlng	0.333815	0.000207207
228	Polr1e	0.329696	0.000250717
229	Lrrfip1	0.32894	0.00025957
230	Nlrc5	0.327589	0.000276119
231	Zakit	0.327113	0.000282167
232	Gm25681	0.325607	0.000302155
233	A930001C03Rik	0.324914	0.00031178
234	Gm17552	0.324362	0.00031965
235	Kank4os	0.323908	0.000326257
236	Islr	0.323092	0.000338464
237	S100a4	0.321928	0.000356595
238	Gabarapl2	0.321595	0.000361938
239	Txnrd2	-0.321078	0.000370389
240	B230208H11Rik	0.318517	0.000415021
241	Krt79	0.316192	0.000459775
242	Gm25873	0.313779	0.000510877
243	4930524J08Rik	0.313393	0.000519528
244	Nubp1	0.311558	0.00056249
245	C130040N14Rik	0.310306	0.00059366
246	Rgn	0.308812	0.000632913
247	Arhgef5	0.308318	0.000646419
248	Agrn	-0.308007	0.000655045
249	Marchf10	0.305265	0.000735875
250	Krt7	0.300997	0.000879991
251	Ints6l	-0.300344	0.000904207
