# Supplementary material for: LCM-seq reveals unique transcriptional adaptation mechanisms of resistant neurons and identifies protective pathways in spinal muscular atrophy
Source: Genome Res. 2020 Aug;30(8):1083–96. doi: 10.1101/gr.265017.120 (PMC7462070; doi:10.1101/gr.265017.120)
Supplement: Supplemental Material [file supp_gr.265017.120_Supplemental_Table_S9.xlsx]

## Sheet: Content
This file contains:
	Supplemental_Table_S9	GO term analysis of somatic motor neurons: Disease module (Midnightblue) and DEGs per cell type and time point.

## Sheet: Table_S9
GO term analysis of somatic motor neurons: Disease module (Midnightblue) and DEGs per cell type and time point.
MF = GO molecular function complete, BP = GO biological process complete, CC = GO cellular compartment complete
PANTHER Overrepresentation Test (release 20170413), GO Ontology database Released 2017-09-26,
Reference List: Mus musculus (all genes in database), Bonferroni correction: true
Group, GO domain	GO term	Number of genes (# genes in term)	Number of genes expected	fold enrichment	P-value
Midnightblue, MF	N/A
Midnightblue, BP	spliceosomal tri-snRNP complex assembly (GO:0000244)	4 (9)	.09	46.81	1.73E-02
	regulation of nitric oxide biosynthetic process (GO:0045428)	8 (62)	.59	13.59	1.62E-03
	signal transduction by p53 class mediator (GO:0072331)	8 (80)	.76	10.53	1.07E-02
	regulation of reactive oxygen species biosynthetic process (GO:1903426)	8 (87)	.83	9.68	1.99E-02
	positive regulation of supramolecular fiber organization (GO:1902905)	10 (166)	1.58	6.34	4.60E-02
	apoptotic signaling pathway (GO:0097190)	16 (282)	2.68	5.98	1.54E-04
	positive regulation of proteolysis (GO:0045862)	14 (297)	2.82	4.96	1.09E-02
	positive regulation of hydrolase activity (GO:0051345)	17 (479)	4.55	3.74	3.60E-02
	positive regulation of cellular component biogenesis (GO:0044089)	17 (479)	4.55	3.74	3.60E-02
	positive regulation of organelle organization (GO:0010638)	21 (598)	5.68	3.70	3.02E-03
	apoptotic process (GO:0006915)	23 (791)	7.51	3.06	2.02E-02
	programmed cell death (GO:0012501)	23 (824)	7.82	2.94	3.94E-02
	positive regulation of intracellular signal transduction (GO:1902533)	24 (886)	8.41	2.85	3.99E-02
	positive regulation of catalytic activity (GO:0043085)	27 (1014)	9.63	2.80	1.33E-02
	regulation of organelle organization (GO:0033043)	30 (1163)	11.04	2.72	6.32E-03
	positive regulation of cellular protein metabolic process (GO:0032270)	34 (1393)	13.23	2.57	3.71E-03
	intracellular signal transduction (GO:0035556)	30 (1261)	11.97	2.51	3.21E-02
	positive regulation of cellular component organization (GO:0051130)	29 (1220)	11.58	2.50	4.81E-02
	regulation of intracellular signal transduction (GO:1902531)	37 (1570)	14.91	2.48	2.49E-03
	positive regulation of protein metabolic process (GO:0051247)	35 (1487)	14.12	2.48	5.67E-03
	positive regulation of signal transduction (GO:0009967)	31 (1334)	12.67	2.45	3.48E-02
	regulation of cellular component organization (GO:0051128)	46 (2336)	22.18	2.07	1.18E-02
	positive regulation of biological process (GO:0048518)	81 (5414)	51.41	1.58	3.72E-02
Midnightblue, CC*	U2-type precatalytic spliceosome (GO:0071005)	5 (16)	.15	33.13	7.46E-04	* PANTHER Overrepresentation Test (Released 20171205), GO Ontology database Released 2018-04-04, Reference List: Mus musculus (all genes in database), Bonferroni correction: true
	precatalytic spliceosome (GO:0071011)	6 (40)	.38	15.90	3.69E-03
	Cajal body (GO:0015030)	5 (35)	.33	15.14	3.23E-02
	U2-type spliceosomal complex (GO:0005684)	7 (68)	.64	10.91	6.32E-03
	small nuclear ribonucleoprotein complex (GO:0030532)	6 (63)	.59	10.10	4.71E-02
	Sm-like protein family complex (GO:0120114)	7 (74)	.70	10.03	1.09E-02
	cytosol (GO:0005829)	64 (3366)	31.75	2.02	1.99E-05
	intracellular organelle part (GO:0044446)	102 (7029)	66.31	1.54	2.94E-04
	organelle part (GO:0044422)	102 (7293)	68.80	1.48	2.01E-03
	cytoplasmic part (GO:0044444)	115 (8233)	77.66	1.48	1.67E-04
	nucleus (GO:0005634)	92 (6641)	62.65	1.47	1.71E-02
	intracellular (GO:0005622)	172 (13486)	127.21	1.35	3.03E-08
	intracellular part (GO:0044424)	171 (13409)	126.49	1.35	4.63E-08
	intracellular membrane-bounded organelle (GO:0043231)	128 (10081)	95.10	1.35	4.94E-03
	intracellular organelle (GO:0043229)	149 (11737)	110.72	1.35	7.20E-05
	cytoplasm (GO:0005737)	135 (10672)	100.67	1.34	1.83E-03
	organelle (GO:0043226)	151 (11981)	113.02	1.34	8.09E-05
	membrane-bounded organelle (GO:0043227)	135 (10788)	101.76	1.33	3.78E-03
	cell part (GO:0044464)	187 (15775)	148.81	1.26	2.79E-07
	cell (GO:0005623)	187 (15778)	148.84	1.26	2.86E-07
	cellular_component (GO:0005575)	209 (20721)	195.46	1.07	6.46E-03
CN3/4 P2, MF	organic cyclic compound binding (GO:0097159)	51 (5248)	28.34	1.80	1.19E-02
	heterocyclic compound binding (GO:1901363)	50 (5154)	27.83	1.80	1.68E-02
	ion binding (GO:0043167)	50 (5293)	28.58	1.75	3.66E-02
CN3/4 P2, BP	N/A
CN3/4 P2, CC	nucleus (GO:0005634)	57 (6464)	34.91	1.63	2.07E-02
	intracellular membrane-bounded organelle (GO:0043231)	82 (9748)	52.64	1.56	7.32E-05
	membrane-bounded organelle (GO:0043227)	91 (11384)	61.48	1.48	3.65E-05
	intracellular organelle (GO:0043229)	86 (11286)	60.95	1.41	3.43E-03
	organelle (GO:0043226)	93 (12315)	66.50	1.40	5.25E-04
	intracellular (GO:0005622)	94 (13036)	70.40	1.34	5.78E-03
	intracellular part (GO:0044424)	92 (12923)	69.79	1.32	2.20E-02
CN3/4 P5, MF	N/A
CN3/4 P5, BP	N/A
CN3/4 P5, CC	N/A
CN3/4 P10, MF	phosphatidylserine binding (GO:0001786)	7 (41)	.59	11.93	8.29E-03
	syntaxin binding (GO:0019905)	10 (89)	1.27	7.85	2.70E-03
	modified amino acid binding (GO:0072341)	9 (81)	1.16	7.76	1.04E-02
	SNARE binding (GO:0000149)	11 (125)	1.79	6.15	8.02E-03
	anion binding (GO:0043168)	73 (2579)	36.91	1.98	2.86E-05
	carbohydrate derivative binding (GO:0097367)	53 (2033)	29.09	1.82	4.88E-02
	small molecule binding (GO:0036094)	59 (2302)	32.94	1.79	2.46E-02
	ion binding (GO:0043167)	115 (5293)	75.75	1.52	1.67E-03
	protein binding (GO:0005515)	179 (8469)	121.20	1.48	1.24E-07
	binding (GO:0005488)	226 (12655)	181.10	1.25	4.45E-04
CN3/4 P10, BP	DNA damage response, signal transduction by p53 class mediator resulting in cell cycle arrest (GO:0006977)	5 (11)	.16	31.76	5.85E-03
	signal transduction involved in mitotic G1 DNA damage checkpoint (GO:0072431)	5 (12)	.17	29.12	8.94E-03
	intracellular signal transduction involved in G1 DNA damage checkpoint (GO:1902400)	5 (12)	.17	29.12	8.94E-03
	signal transduction involved in mitotic cell cycle checkpoint (GO:0072413)	5 (14)	.20	24.96	1.89E-02
	signal transduction involved in mitotic DNA integrity checkpoint (GO:1902403)	5 (14)	.20	24.96	1.89E-02
	signal transduction involved in mitotic DNA damage checkpoint (GO:1902402)	5 (14)	.20	24.96	1.89E-02
	signal transduction involved in DNA damage checkpoint (GO:0072422)	5 (16)	.23	21.84	3.59E-02
	signal transduction involved in DNA integrity checkpoint (GO:0072401)	5 (16)	.23	21.84	3.59E-02
	signal transduction involved in cell cycle checkpoint (GO:0072395)	5 (16)	.23	21.84	3.59E-02
	signal transduction by p53 class mediator (GO:0072331)	9 (80)	1.14	7.86	2.61E-02
	positive regulation of neuron projection development (GO:0010976)	18 (316)	4.52	3.98	8.96E-03
	apoptotic signaling pathway (GO:0097190)	16 (282)	4.04	3.96	3.75E-02
	positive regulation of cell projection organization (GO:0031346)	22 (411)	5.88	3.74	1.60E-03
	regulation of neuron projection development (GO:0010975)	24 (522)	7.47	3.21	6.58E-03
	regulation of plasma membrane bounded cell projection organization (GO:0120035)	29 (672)	9.62	3.02	1.65E-03
	regulation of cell projection organization (GO:0031344)	29 (681)	9.75	2.98	2.17E-03
	behavior (GO:0007610)	27 (635)	9.09	2.97	5.89E-03
	positive regulation of cellular component organization (GO:0051130)	42 (1216)	17.40	2.41	1.29E-03
	generation of neurons (GO:0048699)	51 (1498)	21.44	2.38	7.83E-05
	neurogenesis (GO:0022008)	52 (1599)	22.88	2.27	2.43E-04
	intracellular signal transduction (GO:0035556)	40 (1259)	18.02	2.22	2.06E-02
	regulation of apoptotic process (GO:0042981)	44 (1460)	20.89	2.11	2.41E-02
	regulation of programmed cell death (GO:0043067)	44 (1478)	21.15	2.08	3.29E-02
	regulation of cell death (GO:0010941)	47 (1617)	23.14	2.03	2.79E-02
	nervous system development (GO:0007399)	60 (2104)	30.11	1.99	1.79E-03
	regulation of cellular component organization (GO:0051128)	61 (2332)	33.37	1.83	2.43E-02
	regulation of cell communication (GO:0010646)	71 (2844)	40.70	1.74	1.63E-02
	regulation of signaling (GO:0023051)	71 (2866)	41.01	1.73	2.14E-02
	cellular component organization (GO:0016043)	102 (4667)	66.79	1.53	2.32E-02
	cellular component organization or biogenesis (GO:0071840)	104 (4840)	69.26	1.50	3.84E-02
	cellular process (GO:0009987)	240 (13782)	197.23	1.22	2.08E-03
CN3/4 P10, CC	postsynaptic density (GO:0014069)	14 (234)	3.35	4.18	1.28E-02
	postsynaptic specialization (GO:0099572)	14 (236)	3.38	4.15	1.41E-02
	asymmetric synapse (GO:0032279)	14 (238)	3.41	4.11	1.55E-02
	neuron to neuron synapse (GO:0098984)	14 (240)	3.43	4.08	1.69E-02
	dendrite (GO:0030425)	27 (606)	8.67	3.11	3.74E-04
	postsynapse (GO:0098794)	21 (473)	6.77	3.10	8.56E-03
	synapse part (GO:0044456)	32 (736)	10.53	3.04	4.87E-05
	neuronal cell body (GO:0043025)	28 (656)	9.39	2.98	5.21E-04
	somatodendritic compartment (GO:0036477)	38 (899)	12.87	2.95	4.92E-06
	synapse (GO:0045202)	38 (924)	13.22	2.87	1.02E-05
	cell body (GO:0044297)	29 (734)	10.50	2.76	1.50E-03
	neuron projection (GO:0043005)	49 (1316)	18.83	2.60	1.44E-06
	neuron part (GO:0097458)	57 (1591)	22.77	2.50	2.09E-07
	cell junction (GO:0030054)	37 (1223)	17.50	2.11	2.29E-02
	plasma membrane bounded cell projection (GO:0120025)	58 (1990)	28.48	2.04	2.25E-04
	cell projection (GO:0042995)	62 (2163)	30.95	2.00	1.38E-04
	cell periphery (GO:0071944)	113 (4913)	70.31	1.61	4.47E-05
	plasma membrane (GO:0005886)	109 (4790)	68.55	1.59	1.63E-04
	vesicle (GO:0031982)	86 (3867)	55.34	1.55	1.63E-02
	cytoplasm (GO:0005737)	200 (10309)	147.53	1.36	3.24E-06
	cytoplasmic part (GO:0044444)	150 (7733)	110.67	1.36	4.89E-03
	membrane (GO:0016020)	179 (9458)	135.35	1.32	7.78E-04
	organelle (GO:0043226)	226 (12315)	176.24	1.28	9.47E-06
	intracellular part (GO:0044424)	231 (12923)	184.94	1.25	7.52E-05
	membrane-bounded organelle (GO:0043227)	203 (11384)	162.91	1.25	5.11E-03
	cell part (GO:0044464)	271 (15203)	217.57	1.25	5.91E-09
	cell (GO:0005623)	271 (15207)	217.62	1.25	6.19E-09
	intracellular (GO:0005622)	232 (13036)	186.56	1.24	1.04E-04
	intracellular organelle (GO:0043229)	198 (11286)	161.51	1.23	3.27E-02
	cellular_component (GO:0005575)	315 (20795)	297.59	1.06	1.80E-03
CN7 P2, MF	N/A
CN7 P2, BP	N/A
CN7 P2, CC	N/A
CN7 P5, MF	N/A
CN7 P5, BP	N/A
CN7 P5, CC	N/A
CN7 P10, MF	ion binding (GO:0043167)	110 (5296)	75.55	1.46	2.65E-02
	protein binding (GO:0005515)	170 (8645)	123.33	1.38	2.43E-04
	binding (GO:0005488)	223 (12759)	182.02	1.23	4.33E-03
CN7 P10, BP	DNA damage response, signal transduction by p53 class mediator resulting in cell cycle arrest (GO:0006977)	5 (11)	.16	31.86	5.77E-03
	signal transduction involved in mitotic G1 DNA damage checkpoint (GO:0072431)	5 (12)	.17	29.21	8.81E-03
	intracellular signal transduction involved in G1 DNA damage checkpoint (GO:1902400)	5 (12)	.17	29.21	8.81E-03
	signal transduction involved in mitotic cell cycle checkpoint (GO:0072413)	5 (14)	.20	25.03	1.86E-02
	signal transduction involved in mitotic DNA integrity checkpoint (GO:1902403)	5 (14)	.20	25.03	1.86E-02
	signal transduction involved in mitotic DNA damage checkpoint (GO:1902402)	5 (14)	.20	25.03	1.86E-02
	signal transduction involved in DNA damage checkpoint (GO:0072422)	5 (16)	.23	21.91	3.54E-02
	signal transduction involved in DNA integrity checkpoint (GO:0072401)	5 (16)	.23	21.91	3.54E-02
	signal transduction involved in cell cycle checkpoint (GO:0072395)	5 (16)	.23	21.91	3.54E-02
	signal transduction by p53 class mediator (GO:0072331)	10 (80)	1.14	8.76	2.81E-03
	apoptotic signaling pathway (GO:0097190)	18 (282)	4.02	4.47	1.70E-03
	response to oxidative stress (GO:0006979)	18 (315)	4.49	4.01	8.21E-03
	positive regulation of programmed cell death (GO:0043068)	27 (597)	8.52	3.17	1.70E-03
	positive regulation of cell death (GO:0010942)	29 (651)	9.29	3.12	8.07E-04
	positive regulation of apoptotic process (GO:0043065)	25 (591)	8.43	2.97	1.60E-02
	regulation of programmed cell death (GO:0043067)	51 (1483)	21.16	2.41	5.08E-05
	regulation of apoptotic process (GO:0042981)	50 (1465)	20.90	2.39	9.35E-05
	response to oxygen-containing compound (GO:1901700)	38 (1121)	15.99	2.38	7.74E-03
	cellular response to stress (GO:0033554)	44 (1319)	18.82	2.34	1.50E-03
	regulation of cell death (GO:0010941)	54 (1622)	23.14	2.33	5.09E-05
	regulation of transport (GO:0051049)	52 (1867)	26.63	1.95	2.42E-02
	response to stress (GO:0006950)	79 (2886)	41.17	1.92	6.07E-05
	regulation of localization (GO:0032879)	65 (2609)	37.22	1.75	4.80E-02
CN7 P10, CC	perikaryon (GO:0043204)	10 (130)	1.85	5.39	3.00E-02
	somatodendritic compartment (GO:0036477)	31 (911)	13.00	2.39	1.21E-02
	plasma membrane (GO:0005886)	101 (4794)	68.39	1.48	1.82E-02
	cell periphery (GO:0071944)	103 (4917)	70.14	1.47	1.83E-02
	cytoplasmic part (GO:0044444)	153 (7749)	110.55	1.38	8.56E-04
	cytoplasm (GO:0005737)	200 (10324)	147.28	1.36	2.59E-06
	membrane-bounded organelle (GO:0043227)	209 (11394)	162.54	1.29	1.23E-04
	organelle (GO:0043226)	223 (12328)	175.87	1.27	5.28E-05
	intracellular (GO:0005622)	236 (13052)	186.20	1.27	4.80E-06
	intracellular part (GO:0044424)	232 (12938)	184.57	1.26	2.83E-05
	intracellular organelle (GO:0043229)	201 (11301)	161.22	1.25	5.93E-03
	cell part (GO:0044464)	270 (15213)	217.03	1.24	8.29E-09
	cell (GO:0005623)	270 (15217)	217.08	1.24	8.67E-09
	cellular_component (GO:0005575)	314 (20796)	296.67	1.06	1.94E-03
CN12 P2, MF	binding (GO:0005488)	136 (12759)	106.80	1.27	2.01E-02
CN12 P2, BP	cellular nitrogen compound metabolic process (GO:0034641)	60 (4108)	34.39	1.74	4.12E-02
	cellular metabolic process (GO:0044237)	91 (7163)	59.96	1.52	1.45E-02
CN12 P2, CC	nucleus (GO:0005634)	86 (6469)	54.15	1.59	7.78E-04
	intracellular organelle part (GO:0044446)	88 (6662)	55.76	1.58	6.73E-04
	organelle part (GO:0044422)	90 (6902)	57.77	1.56	8.02E-04
	intracellular membrane-bounded organelle (GO:0043231)	119 (9759)	81.69	1.46	3.88E-05
	cytoplasmic part (GO:0044444)	92 (7749)	64.86	1.42	4.03E-02
	intracellular organelle (GO:0043229)	134 (11301)	94.59	1.42	4.21E-06
	cytoplasm (GO:0005737)	121 (10324)	86.42	1.40	3.36E-04
	membrane-bounded organelle (GO:0043227)	133 (11394)	95.37	1.39	2.00E-05
	intracellular part (GO:0044424)	150 (12938)	108.30	1.39	9.34E-08
	intracellular (GO:0005622)	150 (13052)	109.25	1.37	2.26E-07
	organelle (GO:0043226)	137 (12328)	103.19	1.33	3.13E-04
	cell part (GO:0044464)	160 (15213)	127.34	1.26	3.57E-05
	cell (GO:0005623)	160 (15217)	127.37	1.26	3.67E-05
CN12 P5, MF	N/A
CN12 P5, BP	N/A
CN12 P5, CC	N/A
CN12 P10, MF	protein complex binding (GO:0032403)	10 (920)	1.86	5.37	3.83E-02
CN12 P10, BP	N/A
CN12 P10, CC	N/A
SC P2, MF	neurohypophyseal hormone activity (GO:0005185)	2 (2)	.00	> 100	3.39E-03
SC P2, BP	N/A
SC P2, CC	N/A
SC P5, MF	N/A
SC P5, BP	signal transduction by p53 class mediator (GO:0072331)	5 (80)	.17	30.19	6.25E-03
SC P5, CC	N/A
SC P10, MF	binding (GO:0005488)	167 (12655)	129.28	1.29	4.76E-04
SC P10, BP	DNA damage response, signal transduction by p53 class mediator resulting in cell cycle arrest (GO:0006977)	5 (11)	.11	44.50	1.11E-03
	signal transduction involved in mitotic G1 DNA damage checkpoint (GO:0072431)	5 (12)	.12	40.79	1.70E-03
	intracellular signal transduction involved in G1 DNA damage checkpoint (GO:1902400)	5 (12)	.12	40.79	1.70E-03
	signal transduction involved in mitotic cell cycle checkpoint (GO:0072413)	5 (14)	.14	34.96	3.62E-03
	signal transduction involved in mitotic DNA integrity checkpoint (GO:1902403)	5 (14)	.14	34.96	3.62E-03
	signal transduction involved in mitotic DNA damage checkpoint (GO:1902402)	5 (14)	.14	34.96	3.62E-03
	signal transduction involved in DNA damage checkpoint (GO:0072422)	5 (16)	.16	30.59	6.94E-03
	signal transduction involved in DNA integrity checkpoint (GO:0072401)	5 (16)	.16	30.59	6.94E-03
	signal transduction involved in cell cycle checkpoint (GO:0072395)	5 (16)	.16	30.59	6.94E-03
	mitotic G1 DNA damage checkpoint (GO:0031571)	5 (21)	.21	23.31	2.60E-02
	mitotic G1/S transition checkpoint (GO:0044819)	5 (22)	.22	22.25	3.25E-02
	G1 DNA damage checkpoint (GO:0044783)	5 (22)	.22	22.25	3.25E-02
	DNA damage response, signal transduction by p53 class mediator (GO:0030330)	6 (32)	.33	18.35	1.03E-02
	signal transduction by p53 class mediator (GO:0072331)	9 (80)	.82	11.01	1.61E-03
SC P10, CC	cytoplasmic part (GO:0044444)	116 (7733)	79.00	1.47	4.55E-04
	cytoplasm (GO:0005737)	144 (10309)	105.31	1.37	2.37E-04
	intracellular (GO:0005622)	170 (13036)	133.17	1.28	3.08E-04
	intracellular organelle (GO:0043229)	147 (11286)	115.29	1.28	1.97E-02
	intracellular part (GO:0044424)	167 (12923)	132.02	1.27	1.28E-03
	organelle (GO:0043226)	158 (12315)	125.80	1.26	1.11E-02
	cell part (GO:0044464)	193 (15203)	155.31	1.24	9.89E-06
	cell (GO:0005623)	193 (15207)	155.35	1.24	1.02E-05
