# Supplementary material for: LCM-seq reveals unique transcriptional adaptation mechanisms of resistant neurons and identifies protective pathways in spinal muscular atrophy
Source: Genome Res. 2020 Aug;30(8):1083–96. doi: 10.1101/gr.265017.120 (PMC7462070; doi:10.1101/gr.265017.120)
Supplement: Supplemental Material [file supp_gr.265017.120_Supplemental_Table_S10.xlsx]

## Sheet: Content
This file contains:
	Supplemental_Table_S10	Gene lists from Venn diagram in Fig. 4A. Overlap in differentially expressed genes (SMA versus control) between time points within cell type.

## Sheet: Table_S10
Gene lists from Venn diagram in Fig. 4A. Overlap in differentially expressed genes (SMA versus control) between time points within cell type.
CN3/4	P2, P5, P10	P2, P5	P2, P10	P5, P10	P2	P5	P10		SC	P2, P5, P10	P2, P5	P2, P10	P5, P10	P2	P5	P10
N. genes	1	6	4	6	123	87	327		N. genes	4	0	0	15	13	30	227
1	Smn1	Arglu1	Agt	Cdkn1a	Prima1	Gm12592	Iapp		1	Snrpa1			Dcxr	Sesn2	Eps8	Ly6d
2		Magi1	Sema5a	Eda2r	Ttyh2	Mlana	Cpne2		2	Cdkn1a			Tap1	Nfkbie	Smad7	Fas
3		Zscan26	Btg2	Snrpa1	Nup37	Pcdhb11	Ly6d		3	Trim72			Crip2	Avp	Usp11	Ddit4l
4		Sdcbp2	Snhg11	Snord13	Arl10	Ddias	Gpx3		4	Smn1			Ccng1	Oxt	Luc7l	Ccl17
5		Abcc5		Ano3	Etaa1os	Gbp7	Ccl17		5				Zfp52	Pmch	Prpf8	Inf2
6		Chrac1		Acaa1a	Syn1	Gm4419	Ddit4l		6				Phlda3	mt-Co1	Clic1	Rgs12
7					Slc25a35	Hcst	Psrc1		7				Pidd1	Pou4f3	Mpzl3	Alox8
8					Bdnf	Spag16	Plk2		8				Plk2	Haghl	Commd2	Abhd11os
9					Ccdc151	Gabrd	Ptk2b		9				Cpne2	Ndufb10	Zdhhc7	Ssc5d
10					Pwwp2b	Abi3bp	Dapk1		10				Eda2r	Il23a	Sox10	Tcea3
11					A2m	Gas2l2	Septin11		11				B930036N10Rik	Smr3a	Vipr2	Magt1
12					Kcnq5	Rbm38	Tcea3		12				Pmaip1	Ssna1	Vav2	BC028528
13					Gm10125	Ube2l6	1700007K13Rik		13				Fat1	Slc8b1	Bcor	Dcaf4
14					Fkbp14	Kif13b	Pidd1		14				Inka2		Wdr91	Fahd1
15					Cbx6	Gm26798	Crip2		15				Chodl		Ddx10	Robo3
16					Nrm	Pgr	Emid1		16						Mt1	Gpx3
17					Rce1	Gm11613	Inka2		17						Lgals3bp	Stxbp2
18					Katna1	Gm24289	Gpr179		18						0610030E20Rik	Slc13a4
19					Ube2m	Bhlhe22	Ephx1		19						Adat3	Gtse1
20					Eipr1	Serpina3c	Dcxr		20						Afg1l	Tnfrsf26
21					Mrps34	Rpl28	Trim72		21						Rprm	Csrp3
22					C030014I23Rik	Gm26547	Mmp2		22						Gstm6	Gjb5
23					Uggt1	Gm5898	Ccng1		23						Zfp248	Polk
24					Traf6	Actc1	Tap1		24						Fam72a	C920021L13Rik
25					Mapk11	Zc2hc1c	Scn3b		25						Hapln1	Siglec5
26					Gm23347	Lepr	2410124H12Rik		26						Nutf2	Gm16630
27					Myef2	Erf	Rin1		27						Twist2	9230114K14Rik
28					Gm17066	Cr2	Gjb5		28						Htr1b	Prss56
29					Ubp1	Ak8	Them5		29						Myg1	Timeless
30					Col5a2	Gal	Prss56		30						Snx6	Colq
31					Klhl23	Tmem30c	Tmem43		31							Gm26710
32					Col1a2	Ncoa3	Robo3		32							Rab11fip1
33					Lysmd2	Mgat3	Itpripl1		33							Tubb6
34					Gm12940	Zfp286	Gtse1		34							Gys1
35					Pnn	Tln1	Trp53inp1		35							Flt4
36					Arsj	Zbtb33	Abhd11os		36							Sec16b
37					Gm17477	Tsku	Tnfrsf10b		37							Ptk2b
38					Rbm26	Magt1	Alox5		38							Rab42
39					Pitrm1	3110001I22Rik	Slc2a9		39							Mreg
40					Flnb	Cmas	Gdf15		40							Trim47
41					Tmed8	Hnrnpu	Apaf1		41							Gm15714
42					Msl3	Vgf	9230114K14Rik		42							Sf3b5
43					4921531C22Rik	Cdkn1b	Cacnb3		43							Gm26815
44					Slc4a2	Gm2a	H1f2		44							Eva1c
45					Jmjd1c	Gad1	Rgs12		45							Itpripl1
46					Ube2b	Decr2	Hcfc1r1		46							Tcirg1
47					Pdpk1	Sirt6	Eva1c		47							Mdm2
48					Klhdc4	Tmppe	Phlda3		48							Klhdc7a
49					Rock1	Megf6	Klhl26		49							Map3k20
50					Dock7	Per3	Ctxn1		50							Gm26772
51					Gm11418	Pde11a	Cox6b2		51							Rin1
52					Cpq	Slc36a1	Axl		52							Tmem43
53					Miat	Nvl	Kctd4		53							Ptprv
54					Ankrd13a	Nrbp2	Pmaip1		54							Cox6b2
55					Gbp3	Sema4b	Cav2		55							Eola1
56					Gria3	Ndufb7	Lif		56							Plek2
57					Adamts16	Pik3c2a	R74862		57							Slc27a3
58					C2cd5	Gm26705	Mgmt		58							Psrc1
59					Nudt5	Pde1c	Fas		59							Mak16
60					Tlr3	Galm	Cercam		60							Gm26656
61					Tmtc4	Tmem258	Tunar		61							Snhg15
62					Zbtb6	Iars2	Aldh4a1		62							Smim1
63					Gm3468	Cdan1	Hs3st4		63							Pcgf2
64					Gsap	Zc3h7a	Ptprv		64							Ckap2
65					Tial1	AI480526	Lhx1os		65							5830454E08Rik
66					Cplane1	Fmc1	Tagln2		66							Snrnp200
67					Rtel1	AU021092	Cald1		67							Iapp
68					Rcor3	R3hdm4	Foxa2		68							Tsku
69					Bicd1	Pax8	Homer3		69							Zfp87
70					Fam120a	Lratd1	Mdga1		70							Carlr
71					Osbpl8	Qtrt1	Dmbx1		71							Mmp2
72					Nktr	Pzp	Uspl1		72							Rnase4
73					Acsl1	Actb	Pak4		73							Irgm1
74					Ino80	Ptgs1	Gpr88		74							Smco3
75					Tmem236	Kif22	Mab21l3		75							Trp53
76					4930594M22Rik	Trpc2	Mdm2		76							Txnl4a
77					Fubp3	Cdc45	Etnk2		77							Jmjd6
78					Fbxo11	Ppp4r1	Celf5		78							Tnfrsf10b
79					Hapln1	Spry2	Eps8		79							Gsto1
80					Evi5	Nipsnap2	Spc25		80							Tbc1d8
81					Cnot9	Epb41l5	Pm20d1		81							Mpo
82					Angptl3	Mrpl42	Efs		82							Aamp
83					Fam13a	Hsf2	Gm11738		83							Pard6a
84					Bhlhe41	Kctd2	Cldn10		84							Gon7
85					Ythdc2	Clvs2	Col9a2		85							Zfp365
86					Ano4	Lig1	Nlrc5		86							Cd44
87					Stat4	Gm12115	Nuak2		87							Ddit3
88					Atp7b		Perp		88							H4c8
89					Ddx31		Tnfrsf26		89							Baiap2
90					Ice1		Thumpd1		90							Foxo3
91					Smpd4		Fxyd6		91							Zfp750
92					Actr2		Map3k20		92							Gm26707
93					Naa15		Sgca		93							Ndufaf3
94					Wtap		Mir3091		94							Rad51d
95					Thoc2l		Sh3gl3		95							Cav2
96					Pip4p2		Baiap2		96							Pmm1
97					Nr1d2		Heph		97							Igfbp6
98					Card10		Map4k4		98							Shroom1
99					Mtmr6		Cdc34		99							N4bp1
100					Gas5		Cyb561		100							Bet1l
101					Lmo2		Slc5a9		101							Pamr1
102					Hdac6		Ruvbl2		102							Ces2e
103					Glis2		Ccp110		103							Parp4
104					Man2a1		Celf2		104							Rgs5
105					Luc7l		Snhg18		105							Hcfc1r1
106					Ccnt2		Ift27		106							Slc26a9
107					Tppp		Cplx2		107							Btg2
108					Luzp1		Espn		108							Il17rb
109					B830012L14Rik		Rtl1		109							1700007K13Rik
110					Snhg20		Wdr35		110							Cckbr
111					Acad10		Stmn4		111							Siva1
112					Las1l		Abca1		112							Rchy1
113					Gm26205		Fam110a		113							Klhl26
114					Micu3		Pvt1		114							Hmcn2
115					Rasal3		Acer2		115							Ift27
116					Med7		Neurl2		116							Brix1
117					Etfb		Syt5		117							Colec11
118					Frmpd3		Plxdc2		118							Efcab10
119					Sgpp1		Ube2c		119							Ankrd34c
120					Mtif2		Tshr		120							Tbrg4
121					Arsa		Pak6		121							Nnt
122					Adamts15		E4f1		122							Efs
123					Lgr4		Snord118		123							Nphs1
124							Nmrk2		124							F11r
125							Olfr920		125							Abcd2
126							Syt1		126							Plxdc1
127							Mybl1		127							Ccdc74a
128							Gpr149		128							Ace
129							Rpl27		129							Cadm1
130							Bloc1s2		130							Arhgap9
131							Zfp488		131							Snhg11
132							Aaas		132							Entpd3
133							AI504432		133							Polr3g
134							Ndst3		134							Bicral
135							Spata32		135							Lhpp
136							Gm15675		136							Cstf2
137							Rln1		137							Slc35d3
138							Dclk3		138							Miat
139							Fbxw9		139							Mccc2
140							Snhg15		140							Dnah2
141							Usp34		141							Ddrgk1
142							Tmem74bos		142							Nefh
143							Sf3b5		143							Rph3a
144							Ifitm2		144							Scn4b
145							Polk		145							Srgap2
146							Mycn		146							Ptchd4
147							Sdc1		147							Spata33
148							Chl1		148							Prpsap1
149							Cenpt		149							A530058N18Rik
150							Spint2		150							Prkcb
151							Tmem163		151							CK137956
152							Kifc5b		152							C2cd2l
153							Npas3		153							Pde1b
154							Tnks2		154							Il4ra
155							Serpine2		155							Mettl14
156							Hpcal1		156							Lrrc49
157							Diras2		157							Syndig1l
158							Tcirg1		158							9530059O14Rik
159							Gpc4		159							Tsc22d3
160							Gm26780		160							Thop1
161							Stum		161							Mapk11
162							Trim11		162							Vav3
163							Gap43		163							Slc43a2
164							Gm14057		164							Prelid3a
165							Prpf8		165							Mgat3
166							Ckap2		166							Phtf1
167							Btbd19		167							Rsrp1
168							Pcp4		168							Necab3
169							Scn3a		169							Abca2
170							Plxnb1		170							Nsdhl
171							Ly6c2		171							Alas1
172							Rcbtb1		172							Sqle
173							Sulf2		173							Hnrnpdl
174							Spaca3		174							Syde1
175							Anks1b		175							Kif3a
176							Tmbim4		176							Pask
177							Tmem191c		177							Begain
178							Ass1		178							Impdh1
179							Emx2		179							Susd2
180							Crabp2		180							mt-Nd4
181							Plek2		181							Mvk
182							Ptp4a3		182							Gdf11
183							Sbk1		183							Brms1l
184							Apoa1		184							Zfp687
185							Cop1		185							Chpt1
186							St8sia2		186							Adam23
187							Pdyn		187							Map3k5
188							Dscaml1		188							Arhgef25
189							Glrx3		189							Plekhd1
190							Limk2		190							Vwa8
191							Gpr17		191							Tjp1
192							Stx5a		192							Lama1
193							Adrb3		193							Itgb5
194							Col9a3		194							Chrm2
195							Trp53		195							Tox2
196							Gpr26		196							Cadps
197							Syt16		197							Atp11c
198							Olfm3		198							Kcnq2
199							Septin4		199							AI480526
200							Myl6		200							Pip4k2a
201							Fndc4		201							Acat2
202							Calcb		202							Rexo2
203							Calca		203							Fryl
204							Lrrc49		204							Etl4
205							Lin7b		205							Prr18
206							Ptov1		206							Csad
207							Kctd7		207							Shisa4
208							Vcpkmt		208							Morn1
209							Lgi3		209							Dcun1d4
210							Cuta		210							Pigc
211							Riok3		211							Nrp2
212							Shisa4		212							Adamtsl2
213							Acad8		213							Fzd10os
214							Aldoa		214							Evi5l
215							Necab3		215							Jph4
216							Bag3		216							Hsd17b7
217							Dffa		217							Gpcpd1
218							Shisa8		218							Fndc1
219							Cp		219							Taf15
220							Epdr1		220							Tmem175
221							Slc16a6		221							Ints6l
222							Esyt1		222							Alpl
223							Mthfsd		223							Kif5a
224							Ttc39b		224							Creb3l2
225							Lrrc20		225							Malat1
226							Tmeff2		226							Slc25a33
227							Rph3a		227							Erc2
228							Fkbp1b
229							Prmt3
230							Zfp804a
231							Bbs4
232							Slc38a2
233							Tesc
234							Map2k2
235							Sorcs3
236							Gns
237							Nell2
238							Cyb5r1
239							Nefm
240							Sdhb
241							Susd2
242							Pfkm
243							Lpp
244							Gna14
245							Chrm1
246							Ndufb10
247							Syt3
248							Mical2
249							Fbxo2
250							Eral1
251							Mycbpap
252							Abca2
253							Glud1
254							Kyat1
255							Tecpr2
256							Sgpp2
257							A530058N18Rik
258							Trap1
259							1110008P14Rik
260							Chchd3
261							Abhd3
262							Kcng4
263							Hdhd5
264							Fgf11
265							Ddi2
266							Phyh
267							Cds1
268							Gfm2
269							Slc2a8
270							Dctd
271							Tubb3
272							Thada
273							Myh7b
274							9530077C05Rik
275							Zfp101
276							Tnfrsf12a
277							Gm10109
278							Vwa7
279							Dgcr6
280							Cnpy2
281							Psmc5
282							Sez6l2
283							Sema7a
284							Naxd
285							Plekhd1
286							Lyrm7
287							Polr3gl
288							Swap70
289							Wnt5b
290							Ndufa10
291							Rgcc
292							Fdxr
293							Syndig1
294							Fibp
295							Camkk1
296							Taf4b
297							Prss12
298							Slc2a6
299							Fstl1
300							Chid1
301							Ss18l2
302							Gm4660
303							Prkab2
304							Cacna2d3
305							Sh2d5
306							Gm27031
307							Grm4
308							Rps15
309							Sod2
310							Cdo1
311							Emc9
312							Sfmbt2
313							Gm9938
314							Ppa2
315							Asb13
316							Itpr1
317							Card9
318							Usp31
319							Kcnab1
320							Etl4
321							Tfrc
322							Zdhhc24
323							Htra1
324							Acan
325							Stk38
326							Cpeb1
327							Hspb1
