# Supplementary material for: LCM-seq reveals unique transcriptional adaptation mechanisms of resistant neurons and identifies protective pathways in spinal muscular atrophy
Source: Genome Res. 2020 Aug;30(8):1083–96. doi: 10.1101/gr.265017.120 (PMC7462070; doi:10.1101/gr.265017.120)
Supplement: Supplemental Material [file supp_gr.265017.120_Supplemental_Table_S11.xlsx]

## Sheet: Content
This file contains:
	Supplemental_Table_S11	Gene lists from Venn diagram in Fig. 4B. Overlap in differentially expressed genes (SMA versus control) between CN3/4 and SC per time point.

## Sheet: Table_S11
Gene lists from Venn diagram in Fig. 4B. Overlap in differentially expressed genes (SMA versus control) between CN3/4 and SC per time point.
P2	CN3/4 up	SC up	Shared up	CN3/4 down	SC down	Shared down	P5	CN3/4 up	SC up	Shared up	CN3/4 down	SC down	Shared down	P10	CN3/4 up	SC up	Shared up	CN3/4 down	SC down	Shared down
N. genes	27	5	0	106	11	1	N. genes	33	37	3	63	8	1	N. genes	150	85	56	121	94	11
1	Prima1	Snrpa1		Mapk11	Avp	Smn1	1	Gm12592	Dcxr	Cdkn1a	Gal	Fam72a	Smn1	1	Dapk1	Inf2	Cdkn1a	Septin4	Abcd2	Smn1
2	Ttyh2	Cdkn1a		Gm23347	Oxt		2	Mlana	Tap1	Eda2r	Tmem30c	Hapln1		2	Septin11	B930036N10Rik	Iapp	Myl6	Plxdc1	Lrrc49
3	Nup37	Sesn2		Myef2	Pmch		3	Pcdhb11	Crip2	Snrpa1	Ncoa3	Nutf2		3	Emid1	Alox8	Cpne2	Fndc4	Ccdc74a	Shisa4
4	Agt	Trim72		Snhg11	mt-Co1		4	Ddias	Eps8		Mgat3	Chodl		4	Gpr179	Ssc5d	Ly6d	Calcb	Ace	Necab3
5	Arl10	Nfkbie		Gm17066	Pou4f3		5	Gbp7	Ccng1		Zfp286	Twist2		5	Ephx1	Magt1	Gpx3	Calca	Cadm1	Rph3a
6	Sema5a			Ubp1	Haghl		6	Gm4419	Smad7		Tln1	Htr1b		6	Scn3b	BC028528	Ccl17	Lin7b	Arhgap9	Susd2
7	Etaa1os			Col5a2	Ndufb10		7	Hcst	Usp11		Zbtb33	Myg1		7	2410124H12Rik	Dcaf4	Ddit4l	Ptov1	Entpd3	Abca2
8	Syn1			Klhl23	Il23a		8	Spag16	Luc7l		Tsku	Snx6		8	Ano3	Fahd1	Psrc1	Kctd7	Polr3g	A530058N18Rik
9	Slc25a35			Col1a2	Smr3a		9	Gabrd	Zfp52		Magt1			9	Them5	Stxbp2	Plk2	Vcpkmt	Bicral	Snhg11
10	Bdnf			Lysmd2	Ssna1		10	Abi3bp	Prpf8		3110001I22Rik			10	Snord13	Slc13a4	Ptk2b	Lgi3	Lhpp	Plekhd1
11	Ccdc151			Gm12940	Slc8b1		11	Gas2l2	Phlda3		Cmas			11	Trp53inp1	Csrp3	Tcea3	Cuta	Cstf2	Etl4
12	Pwwp2b			Pnn			12	Snord13	Clic1		Hnrnpu			12	Alox5	C920021L13Rik	1700007K13Rik	Riok3	Slc35d3
13	Btg2			Arsj			13	Rbm38	Mpzl3		Vgf			13	Slc2a9	Siglec5	Pidd1	Acad8	Miat
14	A2m			Gm17477			14	Ube2l6	Commd2		Cdkn1b			14	Gdf15	Gm16630	Crip2	Aldoa	Mccc2
15	Kcnq5			Rbm26			15	Chrac1	Pidd1		Gm2a			15	Apaf1	Timeless	Inka2	Bag3	Dnah2
16	Gm10125			Pitrm1			16	Ano3	Plk2		Gad1			16	Cacnb3	Colq	Dcxr	Dffa	Ddrgk1
17	Fkbp14			Flnb			17	Kif13b	Zdhhc7		Decr2			17	H1f2	Gm26710	Trim72	Shisa8	Nefh
18	Cbx6			Tmed8			18	Gm26798	Sox10		Sirt6			18	Ctxn1	Rab11fip1	Mmp2	Cp	Scn4b
19	Nrm			Arglu1			19	Pgr	Cpne2		Tmppe			19	Axl	Tubb6	Ccng1	Epdr1	Srgap2
20	Rce1			Msl3			20	Gm11613	Vipr2		Zscan26			20	Kctd4	Gys1	Tap1	Slc16a6	Ptchd4
21	Katna1			Magi1			21	Gm24289	Vav2		Megf6			21	Lif	Flt4	Rin1	Esyt1	Spata33
22	Ube2m			4921531C22Rik			22	Bhlhe22	B930036N10Rik		Per3			22	R74862	Sec16b	Gjb5	Mthfsd	Prpsap1
23	Eipr1			Slc4a2			23	Serpina3c	Bcor		Pde11a			23	Mgmt	Zfp52	Prss56	Ttc39b	Prkcb
24	Mrps34			Jmjd1c			24	Rpl28	Wdr91		Slc36a1			24	Cercam	Rab42	Tmem43	Lrrc20	CK137956
25	C030014I23Rik			Ube2b			25	Gm26547	Pmaip1		Nvl			25	Tunar	Mreg	Robo3	Tmeff2	C2cd2l
26	Uggt1			Pdpk1			26	Gm5898	Ddx10		Nrbp2			26	Aldh4a1	Trim47	Itpripl1	Fkbp1b	Pde1b
27	Traf6			Klhdc4			27	Actc1	Trim72		Sema4b			27	Hs3st4	Gm15714	Gtse1	Prmt3	Il4ra
28				Zscan26			28	Zc2hc1c	Mt1		Ndufb7			28	Lhx1os	Gm26815	Abhd11os	Zfp804a	Mettl14
29				Rock1			29	Lepr	Lgals3bp		Pik3c2a			29	Tagln2	Klhdc7a	Tnfrsf10b	Bbs4	Syndig1l
30				Dock7			30	Sdcbp2	0610030E20Rik		Gm26705			30	Cald1	Gm26772	9230114K14Rik	Slc38a2	9530059O14Rik
31				Gm11418			31	Erf	Adat3		Pde1c			31	Foxa2	Eola1	Rgs12	Tesc	Tsc22d3
32				Cpq			32	Cr2	Afg1l		Galm			32	Homer3	Slc27a3	Hcfc1r1	Map2k2	Thop1
33				Miat			33	Ak8	Fat1		Tmem258			33	Mdga1	Mak16	Eva1c	Sorcs3	Mapk11
34				Ankrd13a			34		Rprm		Iars2			34	Dmbx1	Gm26656	Phlda3	Gns	Vav3
35				Gbp3			35		Gstm6		Cdan1			35	Uspl1	Smim1	Klhl26	Nell2	Slc43a2
36				Gria3			36		Zfp248		Zc3h7a			36	Sema5a	Pcgf2	Cox6b2	Cyb5r1	Prelid3a
37				Adamts16			37		Inka2		Acaa1a			37	Pak4	5830454E08Rik	Pmaip1	Nefm	Mgat3
38				C2cd5			38				AI480526			38	Gpr88	Snrnp200	Cav2	Sdhb	Phtf1
39				Nudt5			39				Fmc1			39	Mab21l3	Tsku	Fas	Pfkm	Rsrp1
40				Tlr3			40				AU021092			40	Etnk2	Zfp87	Ptprv	Lpp	Nsdhl
41				Tmtc4			41				R3hdm4			41	Celf5	Carlr	Snrpa1	Gna14	Alas1
42				Zbtb6			42				Pax8			42	Eps8	Rnase4	Mdm2	Chrm1	Sqle
43				Gm3468			43				Lratd1			43	Spc25	Irgm1	Btg2	Ndufb10	Hnrnpdl
44				Gsap			44				Qtrt1			44	Pm20d1	Smco3	Eda2r	Syt3	Syde1
45				Tial1			45				Pzp			45	Agt	Txnl4a	Efs	Mical2	Kif3a
46				Cplane1			46				Actb			46	Gm11738	Jmjd6	Tnfrsf26	Fbxo2	Pask
47				Rtel1			47				Abcc5			47	Cldn10	Gsto1	Map3k20	Eral1	Begain
48				Rcor3			48				Ptgs1			48	Col9a2	Tbc1d8	Baiap2	Mycbpap	Impdh1
49				Bicd1			49				Arglu1			49	Nlrc5	Mpo	Ift27	Glud1	mt-Nd4
50				Fam120a			50				Kif22			50	Nuak2	Aamp	Snhg15	Kyat1	Mvk
51				Osbpl8			51				Trpc2			51	Perp	Pard6a	Sf3b5	Tecpr2	Gdf11
52				Nktr			52				Cdc45			52	Thumpd1	Gon7	Polk	Sgpp2	Brms1l
53				Acsl1			53				Ppp4r1			53	Fxyd6	Zfp365	Tcirg1	Trap1	Zfp687
54				Ino80			54				Spry2			54	Sgca	Cd44	Ckap2	Acaa1a	Chpt1
55				Tmem236			55				Nipsnap2			55	Mir3091	Ddit3	Plek2	1110008P14Rik	Adam23
56				4930594M22Rik			56				Epb41l5			56	Sh3gl3	Fat1	Trp53	Chchd3	Map3k5
57				Fubp3			57				Mrpl42			57	Heph	H4c8		Abhd3	Arhgef25
58				Fbxo11			58				Hsf2			58	Map4k4	Foxo3		Kcng4	Vwa8
59				Hapln1			59				Kctd2			59	Cdc34	Zfp750		Hdhd5	Tjp1
60				Evi5			60				Clvs2			60	Cyb561	Gm26707		Fgf11	Lama1
61				Cnot9			61				Magi1			61	Slc5a9	Ndufaf3		Ddi2	Itgb5
62				Angptl3			62				Lig1			62	Ruvbl2	Rad51d		Phyh	Chrm2
63				Fam13a			63				Gm12115			63	Ccp110	Pmm1		Cds1	Tox2
64				Bhlhe41										64	Celf2	Igfbp6		Gfm2	Cadps
65				Ythdc2										65	Snhg18	Shroom1		Slc2a8	Atp11c
66				Ano4										66	Cplx2	N4bp1		Dctd	Kcnq2
67				Stat4										67	Espn	Bet1l		Tubb3	AI480526
68				Atp7b										68	Rtl1	Pamr1		Thada	Pip4k2a
69				Ddx31										69	Wdr35	Ces2e		Myh7b	Acat2
70				Ice1										70	Stmn4	Parp4		9530077C05Rik	Rexo2
71				Smpd4										71	Abca1	Rgs5		Zfp101	Fryl
72				Actr2										72	Fam110a	Slc26a9		Tnfrsf12a	Prr18
73				Naa15										73	Pvt1	Il17rb		Gm10109	Csad
74				Wtap										74	Acer2	Cckbr		Vwa7	Chodl
75				Sdcbp2										75	Neurl2	Siva1		Dgcr6	Morn1
76				Thoc2l										76	Syt5	Rchy1		Cnpy2	Dcun1d4
77				Pip4p2										77	Plxdc2	Hmcn2		Psmc5	Pigc
78				Nr1d2										78	Ube2c	Brix1		Sez6l2	Nrp2
79				Abcc5										79	Tshr	Colec11		Sema7a	Adamtsl2
80				Card10										80	Pak6	Efcab10		Naxd	Fzd10os
81				Mtmr6										81	E4f1	Ankrd34c		Lyrm7	Evi5l
82				Gas5										82	Snord118	Tbrg4		Polr3gl	Jph4
83				Lmo2										83	Nmrk2	Nnt		Swap70	Hsd17b7
84				Hdac6										84	Olfr920	Nphs1		Wnt5b	Gpcpd1
85				Glis2										85	Syt1	F11r		Ndufa10	Fndc1
86				Man2a1										86	Mybl1			Rgcc	Taf15
87				Luc7l										87	Gpr149			Fdxr	Tmem175
88				Ccnt2										88	Rpl27			Syndig1	Ints6l
89				Tppp										89	Bloc1s2			Fibp	Alpl
90				Luzp1										90	Zfp488			Camkk1	Kif5a
91				B830012L14Rik										91	Aaas			Taf4b	Creb3l2
92				Snhg20										92	AI504432			Prss12	Malat1
93				Acad10										93	Ndst3			Slc2a6	Slc25a33
94				Las1l										94	Spata32			Fstl1	Erc2
95				Gm26205										95	Gm15675			Chid1
96				Chrac1										96	Rln1			Ss18l2
97				Micu3										97	Dclk3			Gm4660
98				Rasal3										98	Fbxw9			Prkab2
99				Med7										99	Usp34			Cacna2d3
100				Etfb										100	Tmem74bos			Sh2d5
101				Frmpd3										101	Ifitm2			Gm27031
102				Sgpp1										102	Mycn			Grm4
103				Mtif2										103	Sdc1			Rps15
104				Arsa										104	Chl1			Sod2
105				Adamts15										105	Cenpt			Cdo1
106				Lgr4										106	Spint2			Emc9
														107	Tmem163			Sfmbt2
														108	Kifc5b			Gm9938
														109	Npas3			Ppa2
														110	Tnks2			Asb13
														111	Serpine2			Itpr1
														112	Hpcal1			Card9
														113	Diras2			Usp31
														114	Gpc4			Kcnab1
														115	Gm26780			Tfrc
														116	Stum			Zdhhc24
														117	Trim11			Htra1
														118	Gap43			Acan
														119	Gm14057			Stk38
														120	Prpf8			Cpeb1
														121	Btbd19			Hspb1
														122	Pcp4
														123	Scn3a
														124	Plxnb1
														125	Ly6c2
														126	Rcbtb1
														127	Sulf2
														128	Spaca3
														129	Anks1b
														130	Tmbim4
														131	Tmem191c
														132	Ass1
														133	Emx2
														134	Crabp2
														135	Ptp4a3
														136	Sbk1
														137	Apoa1
														138	Cop1
														139	St8sia2
														140	Pdyn
														141	Dscaml1
														142	Glrx3
														143	Limk2
														144	Gpr17
														145	Stx5a
														146	Adrb3
														147	Col9a3
														148	Gpr26
														149	Syt16
														150	Olfm3
